# Supplementary material for: Enhancing precision in PANI/Gr nanocomposite design: robust machine learning models, outlier resilience, and molecular input insights for superior electrical conductivity and gas sensing performance
Source: Royal Society of Chemistry journal article supplement (doi:10.1039/d3ta06385b), 2023-12-11
Supplement: d3ta06385b1.xlsx [file d3ta06385b1.xlsx]

## Sheet: Cover
		Supplementary data
		Enhancing Precision in PANI/Gr Nanocomposite Design: Robust Machine Learning Models, Outlier Resilience, and Molecular Input Insights for Superior Electrical Conductivity and Gas Sensing Performance
		Abir Boublia a,1, Zahir Guezzout b, Nacerddine Haddaoui a, Michael Badawi c, Ahmad S. Darwish d, e, Tarek Lemaoui d, e, Fawzi Banat d, f, Krishna Kumar Yadav g, h, Byong-Hun Jeon i, Noureddine Elboughdiri j, k, Yacine Benguerba l,j,* , Inas M. AlNashef d, e, f
		a Laboratoire de Physico-Chimie des Hauts Polymères (LPCHP), Département de Génie des Procédés, Faculté de Technologie, Université Ferhat ABBAS Sétif-1, Sétif, 19000, Algeria
		b Unité de Recherche sur les Matériaux Emergents –Sétif‑ URMES, Equipe de Valorisation Des Polymères, Université Ferhat ABBAS Sétif-1, Sétif, 19000, Algeria
		c Université de Lorraine, CNRS, L2CM, F-57000 Metz, France
		d Department of Chemical Engineering, Khalifa University of Science and Technology, Abu Dhabi, Al Saada St., 127788, United Arab Emirates (UAE)
		e Research & Innovation Center for Graphene and 2D Materials (RIC-2D), Khalifa University, Abu Dhabi, P.O. Box 127788, United Arab Emirates (UAE)
		f Center for Membrane and Advanced Water Technology (CMAT), Khalifa University, Abu Dhabi, Al Saada St., 127788, United Arab Emirates (UAE)
		g Environmental and Atmospheric Sciences Research Group, Scientific Research Center, Al-Ayen University, Thi-Qar, Nasiriyah, 64001, Iraq
		h Faculty of Science and Technology, Madhyanchal Professional University, Ratibad, Bhopal, 462044, India
		iDepartment of Earth Resources & Environmental Engineering, Hanyang University, 222-Wangsimni-ro, Seongdong-gu, Seoul, 04763, Republic of Korea
		j Chemical Engineering Department, College of Engineering, University of Ha’il, P.O. Box 2440, Ha'il 81441, Saudi Arabia
		k Chemical Engineering Process Department, National School of Engineers Gabes, University of Gabes, Gabes 6029, Tunisia
		l Laboratoire de Biopharmacie Et Pharmacotechnie (LBPT), Université Ferhat ABBAS Sétif-1, Sétif, Algeria
		1First authorship: Abir Boublia
	*Corresponding author:
		Yacine Benguerba
		E-mail address: yacinebenguerba@univ-setif.dz

## Sheet: Table S1
	Table S1. Experimental dataset and literature citations for published Electrical Conductivity values.
#	Polymer System#	Set	Monomer			Oxidant			Graphene Filler			Doping Agent				Additive 1			Additive 2			Additive 3			Additive 4				σ-profiles, Additives mix
			Type	Abb.	Amount (mole)	Type	Abb.	Amount (mole)	Type	Abb.	Loading (wt%)	Type	Abb.	Volume (ml)	Concentration (mol/l)	Type	Abb.	Amount (mole)	Type	Abb.	Amount (mole)	Type	Abb.	Amount (mole)	Type	Abb.	Amount (mole)		σ1	σ2	σ3	σ4	σ5	σ6	σ7	σ8	σ9	σ10	σ11	σ12	σ13	σ14	σ15	σ16	σ17	σ18	σ19	σ20	σ21
1	PANI	Training	Aniline	[Ani]	0.004	Ammonium persulfate	[APS]	0.004	/	[/]	0	p-toluenesulfonic acid	[C7H8O3S]	15	0.002	water	[H2O]	3	methanol	[CH3OH]	1.2	/	[/]	0	/	[/]	0		0	0	0	0	0	0	0	0	0	0	0	0	0.3726	2.3832	7.1652	10.722	8.6952	6.4236	7.2816	5.796	3.501
2	PANI	Test	Aniline	[Ani]	0.018	Ammonium persulfate	[APS]	0.018	/	[/]	0	hydrochloric acid	[HCl]	70	0.25	water	[H2O]	3	ethanol	[C2H5OH]	0.9	/	[/]	0	/	[/]	0		0	0	0	0	0	0	0	0	0	0	0	0	0.4428	2.2845	6.7866	10.3512	7.9698	5.6925	7.3116	6.0726	3.6231
3	PANI	Training	Aniline	[Ani]	0.018	Ammonium persulfate	[APS]	0.018	/	[/]	0	hydrochloric acid	[HCl]	70	0.25	water	[H2O]	3	ethanol	[C2H5OH]	0.9	/	[/]	0	/	[/]	0		0	0	0	0	0	0	0	0	0	0	0	0	0.4428	2.2845	6.7866	10.3512	7.9698	5.6925	7.3116	6.0726	3.6231
4	PANI	Training	Aniline	[Ani]	0.018	Ammonium persulfate	[APS]	0.018	/	[/]	0	hydrochloric acid	[HCl]	70	0.25	water	[H2O]	3	ethanol	[C2H5OH]	0.9	/	[/]	0	/	[/]	0		0	0	0	0	0	0	0	0	0	0	0	0	0.4428	2.2845	6.7866	10.3512	7.9698	5.6925	7.3116	6.0726	3.6231
5	PANI	Test	Aniline	[Ani]	0.018	Ammonium persulfate	[APS]	0.018	/	[/]	0	hydrochloric acid	[HCl]	70	0.25	water	[H2O]	3	ethanol	[C2H5OH]	0.9	/	[/]	0	/	[/]	0		0	0	0	0	0	0	0	0	0	0	0	0	0.4428	2.2845	6.7866	10.3512	7.9698	5.6925	7.3116	6.0726	3.6231
6	PANI	Training	Aniline	[Ani]	0.018	Ammonium persulfate	[APS]	0.018	/	[/]	0	hydrochloric acid	[HCl]	70	0.25	water	[H2O]	3	ethanol	[C2H5OH]	0.9	/	[/]	0	/	[/]	0		0	0	0	0	0	0	0	0	0	0	0	0	0.4428	2.2845	6.7866	10.3512	7.9698	5.6925	7.3116	6.0726	3.6231
7	PANI	Training	Aniline	[Ani]	0.018	Ammonium persulfate	[APS]	0.018	/	[/]	0	hydrochloric acid	[HCl]	70	0.25	water	[H2O]	3	ethanol	[C2H5OH]	0.9	/	[/]	0	/	[/]	0		0	0	0	0	0	0	0	0	0	0	0	0	0.4428	2.2845	6.7866	10.3512	7.9698	5.6925	7.3116	6.0726	3.6231
8	PANI	Training	Aniline	[Ani]	0.018	Ammonium persulfate	[APS]	0.018	/	[/]	0	hydrochloric acid	[HCl]	70	0.25	water	[H2O]	3	ethanol	[C2H5OH]	0.9	/	[/]	0	/	[/]	0		0	0	0	0	0	0	0	0	0	0	0	0	0.4428	2.2845	6.7866	10.3512	7.9698	5.6925	7.3116	6.0726	3.6231
9	PANI	Training	Aniline	[Ani]	0.018	Ammonium persulfate	[APS]	0.018	/	[/]	0	hydrochloric acid	[HCl]	70	0.25	water	[H2O]	3	ethanol	[C2H5OH]	0.9	/	[/]	0	/	[/]	0		0	0	0	0	0	0	0	0	0	0	0	0	0.4428	2.2845	6.7866	10.3512	7.9698	5.6925	7.3116	6.0726	3.6231
10	PANI	Training	Aniline	[Ani]	0.018	Ammonium persulfate	[APS]	0.018	/	[/]	0	hydrochloric acid	[HCl]	70	0.25	water	[H2O]	3	ethanol	[C2H5OH]	0.9	/	[/]	0	/	[/]	0		0	0	0	0	0	0	0	0	0	0	0	0	0.4428	2.2845	6.7866	10.3512	7.9698	5.6925	7.3116	6.0726	3.6231
11	PANI	Training	Aniline	[Ani]	0.018	Ammonium persulfate	[APS]	0.018	/	[/]	0	hydrochloric acid	[HCl]	70	0.25	water	[H2O]	3	ethanol	[C2H5OH]	0.9	/	[/]	0	/	[/]	0		0	0	0	0	0	0	0	0	0	0	0	0	0.4428	2.2845	6.7866	10.3512	7.9698	5.6925	7.3116	6.0726	3.6231
12	PANI	Training	Aniline	[Ani]	0.018	Ammonium persulfate	[APS]	0.018	/	[/]	0	hydrochloric acid	[HCl]	70	0.25	water	[H2O]	3	ethanol	[C2H5OH]	0.9	/	[/]	0	/	[/]	0		0	0	0	0	0	0	0	0	0	0	0	0	0.4428	2.2845	6.7866	10.3512	7.9698	5.6925	7.3116	6.0726	3.6231
13	PANI	Test	Aniline	[Ani]	0.018	Ammonium persulfate	[APS]	0.018	/	[/]	0	hydrochloric acid	[HCl]	70	0.25	water	[H2O]	3	ethanol	[C2H5OH]	0.9	/	[/]	0	/	[/]	0		0	0	0	0	0	0	0	0	0	0	0	0	0.4428	2.2845	6.7866	10.3512	7.9698	5.6925	7.3116	6.0726	3.6231
14	PANI	Training	Aniline	[Ani]	0.018	Ammonium persulfate	[APS]	0.018	/	[/]	0	hydrochloric acid	[HCl]	70	0.25	water	[H2O]	3	ethanol	[C2H5OH]	0.9	/	[/]	0	/	[/]	0		0	0	0	0	0	0	0	0	0	0	0	0	0.4428	2.2845	6.7866	10.3512	7.9698	5.6925	7.3116	6.0726	3.6231
15	PANI	Training	Aniline	[Ani]	0.018	Ammonium persulfate	[APS]	0.018	/	[/]	0	hydrochloric acid	[HCl]	70	0.5	water	[H2O]	3	ethanol	[C2H5OH]	0.9	/	[/]	0	/	[/]	0		0	0	0	0	0	0	0	0	0	0	0	0	0.4428	2.2845	6.7866	10.3512	7.9698	5.6925	7.3116	6.0726	3.6231
16	PANI	Training	Aniline	[Ani]	0.018	Ammonium persulfate	[APS]	0.018	/	[/]	0	hydrochloric acid	[HCl]	70	0.5	water	[H2O]	3	ethanol	[C2H5OH]	0.9	/	[/]	0	/	[/]	0		0	0	0	0	0	0	0	0	0	0	0	0	0.4428	2.2845	6.7866	10.3512	7.9698	5.6925	7.3116	6.0726	3.6231
17	PANI	Training	Aniline	[Ani]	0.018	Ammonium persulfate	[APS]	0.018	/	[/]	0	hydrochloric acid	[HCl]	70	0.5	water	[H2O]	3	ethanol	[C2H5OH]	0.9	/	[/]	0	/	[/]	0		0	0	0	0	0	0	0	0	0	0	0	0	0.4428	2.2845	6.7866	10.3512	7.9698	5.6925	7.3116	6.0726	3.6231
18	PANI	Training	Aniline	[Ani]	0.018	Ammonium persulfate	[APS]	0.018	/	[/]	0	hydrochloric acid	[HCl]	70	0.5	water	[H2O]	3	ethanol	[C2H5OH]	0.9	/	[/]	0	/	[/]	0		0	0	0	0	0	0	0	0	0	0	0	0	0.4428	2.2845	6.7866	10.3512	7.9698	5.6925	7.3116	6.0726	3.6231
19	PANI	Training	Aniline	[Ani]	0.018	Ammonium persulfate	[APS]	0.018	/	[/]	0	hydrochloric acid	[HCl]	70	0.5	water	[H2O]	3	ethanol	[C2H5OH]	0.9	/	[/]	0	/	[/]	0		0	0	0	0	0	0	0	0	0	0	0	0	0.4428	2.2845	6.7866	10.3512	7.9698	5.6925	7.3116	6.0726	3.6231
20	PANI	Test	Aniline	[Ani]	0.018	Ammonium persulfate	[APS]	0.018	/	[/]	0	hydrochloric acid	[HCl]	70	0.5	water	[H2O]	3	ethanol	[C2H5OH]	0.9	/	[/]	0	/	[/]	0		0	0	0	0	0	0	0	0	0	0	0	0	0.4428	2.2845	6.7866	10.3512	7.9698	5.6925	7.3116	6.0726	3.6231
21	PANI	Training	Aniline	[Ani]	0.018	Ammonium persulfate	[APS]	0.018	/	[/]	0	hydrochloric acid	[HCl]	70	0.5	water	[H2O]	3	ethanol	[C2H5OH]	0.9	/	[/]	0	/	[/]	0		0	0	0	0	0	0	0	0	0	0	0	0	0.4428	2.2845	6.7866	10.3512	7.9698	5.6925	7.3116	6.0726	3.6231
22	PANI	Training	Aniline	[Ani]	0.018	Ammonium persulfate	[APS]	0.018	/	[/]	0	hydrochloric acid	[HCl]	70	0.5	water	[H2O]	3	ethanol	[C2H5OH]	0.9	/	[/]	0	/	[/]	0		0	0	0	0	0	0	0	0	0	0	0	0	0.4428	2.2845	6.7866	10.3512	7.9698	5.6925	7.3116	6.0726	3.6231
23	PANI	Training	Aniline	[Ani]	0.018	Ammonium persulfate	[APS]	0.018	/	[/]	0	hydrochloric acid	[HCl]	70	0.5	water	[H2O]	3	ethanol	[C2H5OH]	0.9	/	[/]	0	/	[/]	0		0	0	0	0	0	0	0	0	0	0	0	0	0.4428	2.2845	6.7866	10.3512	7.9698	5.6925	7.3116	6.0726	3.6231
24	PANI	Training	Aniline	[Ani]	0.018	Ammonium persulfate	[APS]	0.018	/	[/]	0	hydrochloric acid	[HCl]	70	0.5	water	[H2O]	3	ethanol	[C2H5OH]	0.9	/	[/]	0	/	[/]	0		0	0	0	0	0	0	0	0	0	0	0	0	0.4428	2.2845	6.7866	10.3512	7.9698	5.6925	7.3116	6.0726	3.6231
25	PANI	Test	Aniline	[Ani]	0.018	Ammonium persulfate	[APS]	0.018	/	[/]	0	hydrochloric acid	[HCl]	70	0.5	water	[H2O]	3	ethanol	[C2H5OH]	0.9	/	[/]	0	/	[/]	0		0	0	0	0	0	0	0	0	0	0	0	0	0.4428	2.2845	6.7866	10.3512	7.9698	5.6925	7.3116	6.0726	3.6231
26	PANI	Training	Aniline	[Ani]	0.018	Ammonium persulfate	[APS]	0.018	/	[/]	0	hydrochloric acid	[HCl]	70	0.5	water	[H2O]	3	ethanol	[C2H5OH]	0.9	/	[/]	0	/	[/]	0		0	0	0	0	0	0	0	0	0	0	0	0	0.4428	2.2845	6.7866	10.3512	7.9698	5.6925	7.3116	6.0726	3.6231
27	PANI	Training	Aniline	[Ani]	0.018	Ammonium persulfate	[APS]	0.018	/	[/]	0	hydrochloric acid	[HCl]	70	0.5	water	[H2O]	3	ethanol	[C2H5OH]	0.9	/	[/]	0	/	[/]	0		0	0	0	0	0	0	0	0	0	0	0	0	0.4428	2.2845	6.7866	10.3512	7.9698	5.6925	7.3116	6.0726	3.6231
28	PANI	Test	Aniline	[Ani]	0.018	Ammonium persulfate	[APS]	0.018	/	[/]	0	hydrochloric acid	[HCl]	70	1	water	[H2O]	3	ethanol	[C2H5OH]	0.9	/	[/]	0	/	[/]	0		0	0	0	0	0	0	0	0	0	0	0	0	0.4428	2.2845	6.7866	10.3512	7.9698	5.6925	7.3116	6.0726	3.6231
29	PANI	Training	Aniline	[Ani]	0.018	Ammonium persulfate	[APS]	0.018	/	[/]	0	hydrochloric acid	[HCl]	70	1	water	[H2O]	3	ethanol	[C2H5OH]	0.9	/	[/]	0	/	[/]	0		0	0	0	0	0	0	0	0	0	0	0	0	0.4428	2.2845	6.7866	10.3512	7.9698	5.6925	7.3116	6.0726	3.6231
30	PANI	Training	Aniline	[Ani]	0.018	Ammonium persulfate	[APS]	0.018	/	[/]	0	hydrochloric acid	[HCl]	70	1	water	[H2O]	3	ethanol	[C2H5OH]	0.9	/	[/]	0	/	[/]	0		0	0	0	0	0	0	0	0	0	0	0	0	0.4428	2.2845	6.7866	10.3512	7.9698	5.6925	7.3116	6.0726	3.6231
31	PANI	Test	Aniline	[Ani]	0.018	Ammonium persulfate	[APS]	0.018	/	[/]	0	hydrochloric acid	[HCl]	70	1	water	[H2O]	3	ethanol	[C2H5OH]	0.9	/	[/]	0	/	[/]	0		0	0	0	0	0	0	0	0	0	0	0	0	0.4428	2.2845	6.7866	10.3512	7.9698	5.6925	7.3116	6.0726	3.6231
32	PANI	Test	Aniline	[Ani]	0.018	Ammonium persulfate	[APS]	0.018	/	[/]	0	hydrochloric acid	[HCl]	70	1	water	[H2O]	3	ethanol	[C2H5OH]	0.9	/	[/]	0	/	[/]	0		0	0	0	0	0	0	0	0	0	0	0	0	0.4428	2.2845	6.7866	10.3512	7.9698	5.6925	7.3116	6.0726	3.6231
33	PANI	Test	Aniline	[Ani]	0.018	Ammonium persulfate	[APS]	0.018	/	[/]	0	hydrochloric acid	[HCl]	70	1	water	[H2O]	3	ethanol	[C2H5OH]	0.9	/	[/]	0	/	[/]	0		0	0	0	0	0	0	0	0	0	0	0	0	0.4428	2.2845	6.7866	10.3512	7.9698	5.6925	7.3116	6.0726	3.6231
34	PANI	Training	Aniline	[Ani]	0.018	Ammonium persulfate	[APS]	0.018	/	[/]	0	hydrochloric acid	[HCl]	70	1	water	[H2O]	3	ethanol	[C2H5OH]	0.9	/	[/]	0	/	[/]	0		0	0	0	0	0	0	0	0	0	0	0	0	0.4428	2.2845	6.7866	10.3512	7.9698	5.6925	7.3116	6.0726	3.6231
35	PANI	Training	Aniline	[Ani]	0.018	Ammonium persulfate	[APS]	0.018	/	[/]	0	hydrochloric acid	[HCl]	70	1	water	[H2O]	3	ethanol	[C2H5OH]	0.9	/	[/]	0	/	[/]	0		0	0	0	0	0	0	0	0	0	0	0	0	0.4428	2.2845	6.7866	10.3512	7.9698	5.6925	7.3116	6.0726	3.6231
36	PANI	Test	Aniline	[Ani]	0.018	Ammonium persulfate	[APS]	0.018	/	[/]	0	hydrochloric acid	[HCl]	70	1	water	[H2O]	3	ethanol	[C2H5OH]	0.9	/	[/]	0	/	[/]	0		0	0	0	0	0	0	0	0	0	0	0	0	0.4428	2.2845	6.7866	10.3512	7.9698	5.6925	7.3116	6.0726	3.6231
37	PANI	Training	Aniline	[Ani]	0.018	Ammonium persulfate	[APS]	0.018	/	[/]	0	hydrochloric acid	[HCl]	70	1	water	[H2O]	3	ethanol	[C2H5OH]	0.9	/	[/]	0	/	[/]	0		0	0	0	0	0	0	0	0	0	0	0	0	0.4428	2.2845	6.7866	10.3512	7.9698	5.6925	7.3116	6.0726	3.6231
38	PANI	Training	Aniline	[Ani]	0.018	Ammonium persulfate	[APS]	0.018	/	[/]	0	hydrochloric acid	[HCl]	70	1	water	[H2O]	3	ethanol	[C2H5OH]	0.9	/	[/]	0	/	[/]	0		0	0	0	0	0	0	0	0	0	0	0	0	0.4428	2.2845	6.7866	10.3512	7.9698	5.6925	7.3116	6.0726	3.6231
39	PANI	Training	Aniline	[Ani]	0.018	Ammonium persulfate	[APS]	0.018	/	[/]	0	hydrochloric acid	[HCl]	70	1	water	[H2O]	3	ethanol	[C2H5OH]	0.9	/	[/]	0	/	[/]	0		0	0	0	0	0	0	0	0	0	0	0	0	0.4428	2.2845	6.7866	10.3512	7.9698	5.6925	7.3116	6.0726	3.6231
40	PANI	Training	Aniline	[Ani]	0.018	Ammonium persulfate	[APS]	0.018	/	[/]	0	hydrochloric acid	[HCl]	70	1	water	[H2O]	3	ethanol	[C2H5OH]	0.9	/	[/]	0	/	[/]	0		0	0	0	0	0	0	0	0	0	0	0	0	0.4428	2.2845	6.7866	10.3512	7.9698	5.6925	7.3116	6.0726	3.6231
41	PANI	Test	Aniline	[Ani]	0.018	Ammonium persulfate	[APS]	0.018	/	[/]	0	hydrochloric acid	[HCl]	70	1.25	water	[H2O]	3	ethanol	[C2H5OH]	0.9	/	[/]	0	/	[/]	0		0	0	0	0	0	0	0	0	0	0	0	0	0.4428	2.2845	6.7866	10.3512	7.9698	5.6925	7.3116	6.0726	3.6231
42	PANI	Training	Aniline	[Ani]	0.018	Ammonium persulfate	[APS]	0.018	/	[/]	0	hydrochloric acid	[HCl]	70	1.25	water	[H2O]	3	ethanol	[C2H5OH]	0.9	/	[/]	0	/	[/]	0		0	0	0	0	0	0	0	0	0	0	0	0	0.4428	2.2845	6.7866	10.3512	7.9698	5.6925	7.3116	6.0726	3.6231
43	PANI	Training	Aniline	[Ani]	0.018	Ammonium persulfate	[APS]	0.018	/	[/]	0	hydrochloric acid	[HCl]	70	1.25	water	[H2O]	3	ethanol	[C2H5OH]	0.9	/	[/]	0	/	[/]	0		0	0	0	0	0	0	0	0	0	0	0	0	0.4428	2.2845	6.7866	10.3512	7.9698	5.6925	7.3116	6.0726	3.6231
44	PANI	Training	Aniline	[Ani]	0.018	Ammonium persulfate	[APS]	0.018	/	[/]	0	hydrochloric acid	[HCl]	70	1.25	water	[H2O]	3	ethanol	[C2H5OH]	0.9	/	[/]	0	/	[/]	0		0	0	0	0	0	0	0	0	0	0	0	0	0.4428	2.2845	6.7866	10.3512	7.9698	5.6925	7.3116	6.0726	3.6231
45	PANI	Training	Aniline	[Ani]	0.018	Ammonium persulfate	[APS]	0.018	/	[/]	0	hydrochloric acid	[HCl]	70	1.25	water	[H2O]	3	ethanol	[C2H5OH]	0.9	/	[/]	0	/	[/]	0		0	0	0	0	0	0	0	0	0	0	0	0	0.4428	2.2845	6.7866	10.3512	7.9698	5.6925	7.3116	6.0726	3.6231
46	PANI	Training	Aniline	[Ani]	0.018	Ammonium persulfate	[APS]	0.018	/	[/]	0	hydrochloric acid	[HCl]	70	1.25	water	[H2O]	3	ethanol	[C2H5OH]	0.9	/	[/]	0	/	[/]	0		0	0	0	0	0	0	0	0	0	0	0	0	0.4428	2.2845	6.7866	10.3512	7.9698	5.6925	7.3116	6.0726	3.6231
47	PANI	Training	Aniline	[Ani]	0.018	Ammonium persulfate	[APS]	0.018	/	[/]	0	hydrochloric acid	[HCl]	70	1.25	water	[H2O]	3	ethanol	[C2H5OH]	0.9	/	[/]	0	/	[/]	0		0	0	0	0	0	0	0	0	0	0	0	0	0.4428	2.2845	6.7866	10.3512	7.9698	5.6925	7.3116	6.0726	3.6231
48	PANI	Training	Aniline	[Ani]	0.018	Ammonium persulfate	[APS]	0.018	/	[/]	0	hydrochloric acid	[HCl]	70	1.25	water	[H2O]	3	ethanol	[C2H5OH]	0.9	/	[/]	0	/	[/]	0		0	0	0	0	0	0	0	0	0	0	0	0	0.4428	2.2845	6.7866	10.3512	7.9698	5.6925	7.3116	6.0726	3.6231
49	PANI	Training	Aniline	[Ani]	0.018	Ammonium persulfate	[APS]	0.018	/	[/]	0	hydrochloric acid	[HCl]	70	1.25	water	[H2O]	3	ethanol	[C2H5OH]	0.9	/	[/]	0	/	[/]	0		0	0	0	0	0	0	0	0	0	0	0	0	0.4428	2.2845	6.7866	10.3512	7.9698	5.6925	7.3116	6.0726	3.6231
50	PANI	Training	Aniline	[Ani]	0.018	Ammonium persulfate	[APS]	0.018	/	[/]	0	hydrochloric acid	[HCl]	70	1.25	water	[H2O]	3	ethanol	[C2H5OH]	0.9	/	[/]	0	/	[/]	0		0	0	0	0	0	0	0	0	0	0	0	0	0.4428	2.2845	6.7866	10.3512	7.9698	5.6925	7.3116	6.0726	3.6231
51	PANI	Training	Aniline	[Ani]	0.018	Ammonium persulfate	[APS]	0.018	/	[/]	0	hydrochloric acid	[HCl]	70	1.25	water	[H2O]	3	ethanol	[C2H5OH]	0.9	/	[/]	0	/	[/]	0		0	0	0	0	0	0	0	0	0	0	0	0	0.4428	2.2845	6.7866	10.3512	7.9698	5.6925	7.3116	6.0726	3.6231
52	PANI	Training	Aniline	[Ani]	0.018	Ammonium persulfate	[APS]	0.018	/	[/]	0	hydrochloric acid	[HCl]	70	1.25	water	[H2O]	3	ethanol	[C2H5OH]	0.9	/	[/]	0	/	[/]	0		0	0	0	0	0	0	0	0	0	0	0	0	0.4428	2.2845	6.7866	10.3512	7.9698	5.6925	7.3116	6.0726	3.6231
53	PANI	Training	Aniline	[Ani]	0.018	Ammonium persulfate	[APS]	0.018	/	[/]	0	hydrochloric acid	[HCl]	70	1.25	water	[H2O]	3	ethanol	[C2H5OH]	0.9	/	[/]	0	/	[/]	0		0	0	0	0	0	0	0	0	0	0	0	0	0.4428	2.2845	6.7866	10.3512	7.9698	5.6925	7.3116	6.0726	3.6231
54	PANI	Training	Aniline	[Ani]	0.018	Ammonium persulfate	[APS]	0.018	/	[/]	0	hydrochloric acid	[HCl]	70	1.5	water	[H2O]	3	ethanol	[C2H5OH]	0.9	/	[/]	0	/	[/]	0		0	0	0	0	0	0	0	0	0	0	0	0	0.4428	2.2845	6.7866	10.3512	7.9698	5.6925	7.3116	6.0726	3.6231
55	PANI	Test	Aniline	[Ani]	0.018	Ammonium persulfate	[APS]	0.018	/	[/]	0	hydrochloric acid	[HCl]	70	1.5	water	[H2O]	3	ethanol	[C2H5OH]	0.9	/	[/]	0	/	[/]	0		0	0	0	0	0	0	0	0	0	0	0	0	0.4428	2.2845	6.7866	10.3512	7.9698	5.6925	7.3116	6.0726	3.6231
56	PANI	Test	Aniline	[Ani]	0.018	Ammonium persulfate	[APS]	0.018	/	[/]	0	hydrochloric acid	[HCl]	70	1.5	water	[H2O]	3	ethanol	[C2H5OH]	0.9	/	[/]	0	/	[/]	0		0	0	0	0	0	0	0	0	0	0	0	0	0.4428	2.2845	6.7866	10.3512	7.9698	5.6925	7.3116	6.0726	3.6231
57	PANI	Training	Aniline	[Ani]	0.018	Ammonium persulfate	[APS]	0.018	/	[/]	0	hydrochloric acid	[HCl]	70	1.5	water	[H2O]	3	ethanol	[C2H5OH]	0.9	/	[/]	0	/	[/]	0		0	0	0	0	0	0	0	0	0	0	0	0	0.4428	2.2845	6.7866	10.3512	7.9698	5.6925	7.3116	6.0726	3.6231
58	PANI	Training	Aniline	[Ani]	0.018	Ammonium persulfate	[APS]	0.018	/	[/]	0	hydrochloric acid	[HCl]	70	1.5	water	[H2O]	3	ethanol	[C2H5OH]	0.9	/	[/]	0	/	[/]	0		0	0	0	0	0	0	0	0	0	0	0	0	0.4428	2.2845	6.7866	10.3512	7.9698	5.6925	7.3116	6.0726	3.6231
59	PANI	Training	Aniline	[Ani]	0.018	Ammonium persulfate	[APS]	0.018	/	[/]	0	hydrochloric acid	[HCl]	70	1.5	water	[H2O]	3	ethanol	[C2H5OH]	0.9	/	[/]	0	/	[/]	0		0	0	0	0	0	0	0	0	0	0	0	0	0.4428	2.2845	6.7866	10.3512	7.9698	5.6925	7.3116	6.0726	3.6231
60	PANI	Test	Aniline	[Ani]	0.018	Ammonium persulfate	[APS]	0.018	/	[/]	0	hydrochloric acid	[HCl]	70	1.5	water	[H2O]	3	ethanol	[C2H5OH]	0.9	/	[/]	0	/	[/]	0		0	0	0	0	0	0	0	0	0	0	0	0	0.4428	2.2845	6.7866	10.3512	7.9698	5.6925	7.3116	6.0726	3.6231
61	PANI	Training	Aniline	[Ani]	0.018	Ammonium persulfate	[APS]	0.018	/	[/]	0	hydrochloric acid	[HCl]	70	1.5	water	[H2O]	3	ethanol	[C2H5OH]	0.9	/	[/]	0	/	[/]	0		0	0	0	0	0	0	0	0	0	0	0	0	0.4428	2.2845	6.7866	10.3512	7.9698	5.6925	7.3116	6.0726	3.6231
62	PANI	Training	Aniline	[Ani]	0.018	Ammonium persulfate	[APS]	0.018	/	[/]	0	hydrochloric acid	[HCl]	70	1.5	water	[H2O]	3	ethanol	[C2H5OH]	0.9	/	[/]	0	/	[/]	0		0	0	0	0	0	0	0	0	0	0	0	0	0.4428	2.2845	6.7866	10.3512	7.9698	5.6925	7.3116	6.0726	3.6231
63	PANI	Training	Aniline	[Ani]	0.018	Ammonium persulfate	[APS]	0.018	/	[/]	0	hydrochloric acid	[HCl]	70	1.5	water	[H2O]	3	ethanol	[C2H5OH]	0.9	/	[/]	0	/	[/]	0		0	0	0	0	0	0	0	0	0	0	0	0	0.4428	2.2845	6.7866	10.3512	7.9698	5.6925	7.3116	6.0726	3.6231
64	PANI	Training	Aniline	[Ani]	0.018	Ammonium persulfate	[APS]	0.018	/	[/]	0	hydrochloric acid	[HCl]	70	1.5	water	[H2O]	3	ethanol	[C2H5OH]	0.9	/	[/]	0	/	[/]	0		0	0	0	0	0	0	0	0	0	0	0	0	0.4428	2.2845	6.7866	10.3512	7.9698	5.6925	7.3116	6.0726	3.6231
65	PANI	Training	Aniline	[Ani]	0.018	Ammonium persulfate	[APS]	0.018	/	[/]	0	hydrochloric acid	[HCl]	70	1.5	water	[H2O]	3	ethanol	[C2H5OH]	0.9	/	[/]	0	/	[/]	0		0	0	0	0	0	0	0	0	0	0	0	0	0.4428	2.2845	6.7866	10.3512	7.9698	5.6925	7.3116	6.0726	3.6231
66	PANI	Training	Aniline	[Ani]	0.018	Ammonium persulfate	[APS]	0.018	/	[/]	0	hydrochloric acid	[HCl]	70	1.5	water	[H2O]	3	ethanol	[C2H5OH]	0.9	/	[/]	0	/	[/]	0		0	0	0	0	0	0	0	0	0	0	0	0	0.4428	2.2845	6.7866	10.3512	7.9698	5.6925	7.3116	6.0726	3.6231
67	PANI	Training	Aniline	[Ani]	0.02	Ammonium persulfate	[APS]	0.02	/	[/]	0	camphorsulfonic acid	[C10H16O4S]	20	1	water	[H2O]	3	methanol	[CH3OH]	1.2	Ethyl ether	[(C2H5)2O]	0.5	/	[/]	0		0	0	0	0	0	0	0	0	0	0	0	0	0.3726	2.3832	7.1652	10.722	8.6952	6.4236	7.2816	5.796	3.501
68	PANI	Test	Aniline	[Ani]	0.02	Ammonium persulfate	[APS]	0.02	/	[/]	0	camphorsulfonic acid	[C10H16O4S]	20	1	water	[H2O]	3	methanol	[CH3OH]	1.2	Ethyl ether	[(C2H5)2O]	0.5	/	[/]	0		0	0	0	0	0	0	0	0	0	0	0	0	0.3726	2.3832	7.1652	10.722	8.6952	6.4236	7.2816	5.796	3.501
69	PANI	Training	Aniline	[Ani]	2.15	Potassium persulfate	[KPS]	0.27	/	[/]	0	hydrochloric acid	[HCl]	2100	1	water	[H2O]	55.6	/	[/]	0	/	[/]	0	/	[/]	0		0	0	0	0	0	0	0	0	0	0	0	0	6.5052	33.5824	107.864	173.694	136.998	94.4088	119.762	99.9688	60.326
70	PANI /TiO2	Training	Aniline	[Ani]	2.15	Potassium persulfate	[KPS]	0.27	/	[/]	0	hydrochloric acid	[HCl]	2300	1	water	[H2O]	55.6	titanium dioxide	[TiO2]	0.6	/	[/]	0	/	[/]	0		0	0	0	0	0	0	0.447	1.3098	2.9502	4.047	2.2476	0.288	6.5052	34.0498	109.758	176.079	137.957	94.4088	120.335	101.26	61.1906
71	PANI /TiO2	Test	Aniline	[Ani]	2.15	Potassium persulfate	[KPS]	0.27	/	[/]	0	hydrochloric acid	[HCl]	2300	1	water	[H2O]	55.6	titanium dioxide	[TiO2]	1.9	/	[/]	0	/	[/]	0		0	0	0	0	0	0	1.4155	4.1477	9.3423	12.8155	7.1174	0.912	6.5052	35.0625	113.862	181.247	140.035	94.4088	121.575	104.058	63.0639
72	PANI /TiO2	Training	Aniline	[Ani]	2.15	Potassium persulfate	[KPS]	0.27	/	[/]	0	hydrochloric acid	[HCl]	2300	1	water	[H2O]	55.6	titanium dioxide	[TiO2]	3.1	/	[/]	0	/	[/]	0		0	0	0	0	0	0	2.3095	6.7673	15.2427	20.9095	11.6126	1.488	6.5052	35.9973	117.651	186.017	141.952	94.4088	122.72	106.64	64.7931
73	PANI /TiO2	Training	Aniline	[Ani]	2.15	Potassium persulfate	[KPS]	0.27	/	[/]	0	hydrochloric acid	[HCl]	2300	1	water	[H2O]	55.6	titanium dioxide	[TiO2]	4.4	/	[/]	0	/	[/]	0		0	0	0	0	0	0	3.278	9.6052	21.6348	29.678	16.4824	2.112	6.5052	37.01	121.755	191.184	144.03	94.4088	123.96	109.438	66.6664
74	PANI /TiO2	Training	Aniline	[Ani]	2.15	Potassium persulfate	[KPS]	0.27	/	[/]	0	hydrochloric acid	[HCl]	2300	1	water	[H2O]	55.6	titanium dioxide	[TiO2]	6.3	/	[/]	0	/	[/]	0		0	0	0	0	0	0	4.6935	13.7529	30.9771	42.4935	23.5998	3.024	6.5052	38.4901	127.753	198.737	147.066	94.4088	125.773	113.526	69.4043
75	PANI	Training	Aniline	[Ani]	2.15	Potassium persulfate	[KPS]	0.27	/	[/]	0	hydrochloric acid	[HCl]	2300	1	water	[H2O]	55.6	/	[/]	0	/	[/]	0	/	[/]	0		0	0	0	0	0	0	0	0	0	0	0	0	6.5052	33.5824	107.864	173.694	136.998	94.4088	119.762	99.9688	60.326
76	PANI	Training	Aniline	[Ani]	2.15	Potassium persulfate	[KPS]	0.27	/	[/]	0	hydrochloric acid	[HCl]	2300	1	water	[H2O]	55.6	/	[/]	0	/	[/]	0	/	[/]	0		0	0	0	0	0	0	0	0	0	0	0	0	6.5052	33.5824	107.864	173.694	136.998	94.4088	119.762	99.9688	60.326
77	PANI	Test	Aniline	[Ani]	2.15	Potassium persulfate	[KPS]	0.27	/	[/]	0	hydrochloric acid	[HCl]	2300	1	water	[H2O]	55.6	/	[/]	0	/	[/]	0	/	[/]	0		0	0	0	0	0	0	0	0	0	0	0	0	6.5052	33.5824	107.864	173.694	136.998	94.4088	119.762	99.9688	60.326
78	PANI	Training	Aniline	[Ani]	2.15	Potassium persulfate	[KPS]	0.27	/	[/]	0	hydrochloric acid	[HCl]	2300	1	water	[H2O]	55.6	/	[/]	0	/	[/]	0	/	[/]	0		0	0	0	0	0	0	0	0	0	0	0	0	6.5052	33.5824	107.864	173.694	136.998	94.4088	119.762	99.9688	60.326
79	PANI	Training	Aniline	[Ani]	2.15	Potassium persulfate	[KPS]	0.27	/	[/]	0	hydrochloric acid	[HCl]	2300	1	water	[H2O]	55.6	/	[/]	0	/	[/]	0	/	[/]	0		0	0	0	0	0	0	0	0	0	0	0	0	6.5052	33.5824	107.864	173.694	136.998	94.4088	119.762	99.9688	60.326
80	PANI	Training	Aniline	[Ani]	2.15	Potassium persulfate	[KPS]	0.27	/	[/]	0	hydrochloric acid	[HCl]	2300	1	water	[H2O]	55.6	/	[/]	0	/	[/]	0	/	[/]	0		0	0	0	0	0	0	0	0	0	0	0	0	6.5052	33.5824	107.864	173.694	136.998	94.4088	119.762	99.9688	60.326
81	PANI	Training	Aniline	[Ani]	2.15	Potassium persulfate	[KPS]	0.27	/	[/]	0	hydrochloric acid	[HCl]	2300	1	water	[H2O]	55.6	/	[/]	0	/	[/]	0	/	[/]	0		0	0	0	0	0	0	0	0	0	0	0	0	6.5052	33.5824	107.864	173.694	136.998	94.4088	119.762	99.9688	60.326
82	PANI	Training	Aniline	[Ani]	2.15	Potassium persulfate	[KPS]	0.27	/	[/]	0	hydrochloric acid	[HCl]	2300	1	water	[H2O]	55.6	/	[/]	0	/	[/]	0	/	[/]	0		0	0	0	0	0	0	0	0	0	0	0	0	6.5052	33.5824	107.864	173.694	136.998	94.4088	119.762	99.9688	60.326
83	PANI	Training	Aniline	[Ani]	2.15	Potassium persulfate	[KPS]	0.27	/	[/]	0	hydrochloric acid	[HCl]	2300	1	water	[H2O]	55.6	/	[/]	0	/	[/]	0	/	[/]	0		0	0	0	0	0	0	0	0	0	0	0	0	6.5052	33.5824	107.864	173.694	136.998	94.4088	119.762	99.9688	60.326
84	PANI	Training	Aniline	[Ani]	2.15	Potassium persulfate	[KPS]	0.27	/	[/]	0	hydrochloric acid	[HCl]	2300	1	water	[H2O]	55.6	/	[/]	0	/	[/]	0	/	[/]	0		0	0	0	0	0	0	0	0	0	0	0	0	6.5052	33.5824	107.864	173.694	136.998	94.4088	119.762	99.9688	60.326
85	PANI	Training	Aniline	[Ani]	2.15	Potassium persulfate	[KPS]	0.27	/	[/]	0	hydrochloric acid	[HCl]	2300	1	water	[H2O]	55.6	/	[/]	0	/	[/]	0	/	[/]	0		0	0	0	0	0	0	0	0	0	0	0	0	6.5052	33.5824	107.864	173.694	136.998	94.4088	119.762	99.9688	60.326
86	PANI	Training	Aniline	[Ani]	2.15	Potassium persulfate	[KPS]	0.27	/	[/]	0	hydrochloric acid	[HCl]	2300	1	water	[H2O]	55.6	/	[/]	0	/	[/]	0	/	[/]	0		0	0	0	0	0	0	0	0	0	0	0	0	6.5052	33.5824	107.864	173.694	136.998	94.4088	119.762	99.9688	60.326
87	PANI /TiO2	Training	Aniline	[Ani]	2.15	Potassium persulfate	[KPS]	0.27	/	[/]	0	hydrochloric acid	[HCl]	2300	1	water	[H2O]	55.6	titanium dioxide	[TiO2]	0.6	/	[/]	0	/	[/]	0		0	0	0	0	0	0	0.447	1.3098	2.9502	4.047	2.2476	0.288	6.5052	34.0498	109.758	176.079	137.957	94.4088	120.335	101.26	61.1906
88	PANI /TiO2	Training	Aniline	[Ani]	2.15	Potassium persulfate	[KPS]	0.27	/	[/]	0	hydrochloric acid	[HCl]	2300	1	water	[H2O]	55.6	titanium dioxide	[TiO2]	0.6	/	[/]	0	/	[/]	0		0	0	0	0	0	0	0.447	1.3098	2.9502	4.047	2.2476	0.288	6.5052	34.0498	109.758	176.079	137.957	94.4088	120.335	101.26	61.1906
89	PANI /TiO2	Training	Aniline	[Ani]	2.15	Potassium persulfate	[KPS]	0.27	/	[/]	0	hydrochloric acid	[HCl]	2300	1	water	[H2O]	55.6	titanium dioxide	[TiO2]	0.6	/	[/]	0	/	[/]	0		0	0	0	0	0	0	0.447	1.3098	2.9502	4.047	2.2476	0.288	6.5052	34.0498	109.758	176.079	137.957	94.4088	120.335	101.26	61.1906
90	PANI /TiO2	Training	Aniline	[Ani]	2.15	Potassium persulfate	[KPS]	0.27	/	[/]	0	hydrochloric acid	[HCl]	2300	1	water	[H2O]	55.6	titanium dioxide	[TiO2]	0.6	/	[/]	0	/	[/]	0		0	0	0	0	0	0	0.447	1.3098	2.9502	4.047	2.2476	0.288	6.5052	34.0498	109.758	176.079	137.957	94.4088	120.335	101.26	61.1906
91	PANI /TiO2	Training	Aniline	[Ani]	2.15	Potassium persulfate	[KPS]	0.27	/	[/]	0	hydrochloric acid	[HCl]	2300	1	water	[H2O]	55.6	titanium dioxide	[TiO2]	0.6	/	[/]	0	/	[/]	0		0	0	0	0	0	0	0.447	1.3098	2.9502	4.047	2.2476	0.288	6.5052	34.0498	109.758	176.079	137.957	94.4088	120.335	101.26	61.1906
92	PANI /TiO2	Training	Aniline	[Ani]	2.15	Potassium persulfate	[KPS]	0.27	/	[/]	0	hydrochloric acid	[HCl]	2300	1	water	[H2O]	55.6	titanium dioxide	[TiO2]	0.6	/	[/]	0	/	[/]	0		0	0	0	0	0	0	0.447	1.3098	2.9502	4.047	2.2476	0.288	6.5052	34.0498	109.758	176.079	137.957	94.4088	120.335	101.26	61.1906
93	PANI /TiO2	Training	Aniline	[Ani]	2.15	Potassium persulfate	[KPS]	0.27	/	[/]	0	hydrochloric acid	[HCl]	2300	1	water	[H2O]	55.6	titanium dioxide	[TiO2]	0.6	/	[/]	0	/	[/]	0		0	0	0	0	0	0	0.447	1.3098	2.9502	4.047	2.2476	0.288	6.5052	34.0498	109.758	176.079	137.957	94.4088	120.335	101.26	61.1906
94	PANI /TiO2	Training	Aniline	[Ani]	2.15	Potassium persulfate	[KPS]	0.27	/	[/]	0	hydrochloric acid	[HCl]	2300	1	water	[H2O]	55.6	titanium dioxide	[TiO2]	0.6	/	[/]	0	/	[/]	0		0	0	0	0	0	0	0.447	1.3098	2.9502	4.047	2.2476	0.288	6.5052	34.0498	109.758	176.079	137.957	94.4088	120.335	101.26	61.1906
95	PANI /TiO2	Test	Aniline	[Ani]	2.15	Potassium persulfate	[KPS]	0.27	/	[/]	0	hydrochloric acid	[HCl]	2300	1	water	[H2O]	55.6	titanium dioxide	[TiO2]	0.6	/	[/]	0	/	[/]	0		0	0	0	0	0	0	0.447	1.3098	2.9502	4.047	2.2476	0.288	6.5052	34.0498	109.758	176.079	137.957	94.4088	120.335	101.26	61.1906
96	PANI /TiO2	Training	Aniline	[Ani]	2.15	Potassium persulfate	[KPS]	0.27	/	[/]	0	hydrochloric acid	[HCl]	2300	1	water	[H2O]	55.6	titanium dioxide	[TiO2]	0.6	/	[/]	0	/	[/]	0		0	0	0	0	0	0	0.447	1.3098	2.9502	4.047	2.2476	0.288	6.5052	34.0498	109.758	176.079	137.957	94.4088	120.335	101.26	61.1906
97	PANI /TiO2	Test	Aniline	[Ani]	2.15	Potassium persulfate	[KPS]	0.27	/	[/]	0	hydrochloric acid	[HCl]	2300	1	water	[H2O]	55.6	titanium dioxide	[TiO2]	0.6	/	[/]	0	/	[/]	0		0	0	0	0	0	0	0.447	1.3098	2.9502	4.047	2.2476	0.288	6.5052	34.0498	109.758	176.079	137.957	94.4088	120.335	101.26	61.1906
98	PANI /TiO2	Training	Aniline	[Ani]	2.15	Potassium persulfate	[KPS]	0.27	/	[/]	0	hydrochloric acid	[HCl]	2300	1	water	[H2O]	55.6	titanium dioxide	[TiO2]	0.6	/	[/]	0	/	[/]	0		0	0	0	0	0	0	0.447	1.3098	2.9502	4.047	2.2476	0.288	6.5052	34.0498	109.758	176.079	137.957	94.4088	120.335	101.26	61.1906
99	PANI /TiO2	Training	Aniline	[Ani]	2.15	Potassium persulfate	[KPS]	0.27	/	[/]	0	hydrochloric acid	[HCl]	2300	1	water	[H2O]	55.6	titanium dioxide	[TiO2]	1.9	/	[/]	0	/	[/]	0		0	0	0	0	0	0	1.4155	4.1477	9.3423	12.8155	7.1174	0.912	6.5052	35.0625	113.862	181.247	140.035	94.4088	121.575	104.058	63.0639
100	PANI /TiO2	Training	Aniline	[Ani]	2.15	Potassium persulfate	[KPS]	0.27	/	[/]	0	hydrochloric acid	[HCl]	2300	1	water	[H2O]	55.6	titanium dioxide	[TiO2]	1.9	/	[/]	0	/	[/]	0		0	0	0	0	0	0	1.4155	4.1477	9.3423	12.8155	7.1174	0.912	6.5052	35.0625	113.862	181.247	140.035	94.4088	121.575	104.058	63.0639
101	PANI /TiO2	Training	Aniline	[Ani]	2.15	Potassium persulfate	[KPS]	0.27	/	[/]	0	hydrochloric acid	[HCl]	2300	1	water	[H2O]	55.6	titanium dioxide	[TiO2]	1.9	/	[/]	0	/	[/]	0		0	0	0	0	0	0	1.4155	4.1477	9.3423	12.8155	7.1174	0.912	6.5052	35.0625	113.862	181.247	140.035	94.4088	121.575	104.058	63.0639
102	PANI /TiO2	Training	Aniline	[Ani]	2.15	Potassium persulfate	[KPS]	0.27	/	[/]	0	hydrochloric acid	[HCl]	2300	1	water	[H2O]	55.6	titanium dioxide	[TiO2]	1.9	/	[/]	0	/	[/]	0		0	0	0	0	0	0	1.4155	4.1477	9.3423	12.8155	7.1174	0.912	6.5052	35.0625	113.862	181.247	140.035	94.4088	121.575	104.058	63.0639
103	PANI /TiO2	Test	Aniline	[Ani]	2.15	Potassium persulfate	[KPS]	0.27	/	[/]	0	hydrochloric acid	[HCl]	2300	1	water	[H2O]	55.6	titanium dioxide	[TiO2]	1.9	/	[/]	0	/	[/]	0		0	0	0	0	0	0	1.4155	4.1477	9.3423	12.8155	7.1174	0.912	6.5052	35.0625	113.862	181.247	140.035	94.4088	121.575	104.058	63.0639
104	PANI /TiO2	Test	Aniline	[Ani]	2.15	Potassium persulfate	[KPS]	0.27	/	[/]	0	hydrochloric acid	[HCl]	2300	1	water	[H2O]	55.6	titanium dioxide	[TiO2]	1.9	/	[/]	0	/	[/]	0		0	0	0	0	0	0	1.4155	4.1477	9.3423	12.8155	7.1174	0.912	6.5052	35.0625	113.862	181.247	140.035	94.4088	121.575	104.058	63.0639
105	PANI /TiO2	Training	Aniline	[Ani]	2.15	Potassium persulfate	[KPS]	0.27	/	[/]	0	hydrochloric acid	[HCl]	2300	1	water	[H2O]	55.6	titanium dioxide	[TiO2]	1.9	/	[/]	0	/	[/]	0		0	0	0	0	0	0	1.4155	4.1477	9.3423	12.8155	7.1174	0.912	6.5052	35.0625	113.862	181.247	140.035	94.4088	121.575	104.058	63.0639
106	PANI /TiO2	Training	Aniline	[Ani]	2.15	Potassium persulfate	[KPS]	0.27	/	[/]	0	hydrochloric acid	[HCl]	2300	1	water	[H2O]	55.6	titanium dioxide	[TiO2]	1.9	/	[/]	0	/	[/]	0		0	0	0	0	0	0	1.4155	4.1477	9.3423	12.8155	7.1174	0.912	6.5052	35.0625	113.862	181.247	140.035	94.4088	121.575	104.058	63.0639
107	PANI /TiO2	Training	Aniline	[Ani]	2.15	Potassium persulfate	[KPS]	0.27	/	[/]	0	hydrochloric acid	[HCl]	2300	1	water	[H2O]	55.6	titanium dioxide	[TiO2]	1.9	/	[/]	0	/	[/]	0		0	0	0	0	0	0	1.4155	4.1477	9.3423	12.8155	7.1174	0.912	6.5052	35.0625	113.862	181.247	140.035	94.4088	121.575	104.058	63.0639
108	PANI /TiO2	Training	Aniline	[Ani]	2.15	Potassium persulfate	[KPS]	0.27	/	[/]	0	hydrochloric acid	[HCl]	2300	1	water	[H2O]	55.6	titanium dioxide	[TiO2]	1.9	/	[/]	0	/	[/]	0		0	0	0	0	0	0	1.4155	4.1477	9.3423	12.8155	7.1174	0.912	6.5052	35.0625	113.862	181.247	140.035	94.4088	121.575	104.058	63.0639
109	PANI /TiO2	Training	Aniline	[Ani]	2.15	Potassium persulfate	[KPS]	0.27	/	[/]	0	hydrochloric acid	[HCl]	2300	1	water	[H2O]	55.6	titanium dioxide	[TiO2]	1.9	/	[/]	0	/	[/]	0		0	0	0	0	0	0	1.4155	4.1477	9.3423	12.8155	7.1174	0.912	6.5052	35.0625	113.862	181.247	140.035	94.4088	121.575	104.058	63.0639
110	PANI /TiO2	Training	Aniline	[Ani]	2.15	Potassium persulfate	[KPS]	0.27	/	[/]	0	hydrochloric acid	[HCl]	2300	1	water	[H2O]	55.6	titanium dioxide	[TiO2]	1.9	/	[/]	0	/	[/]	0		0	0	0	0	0	0	1.4155	4.1477	9.3423	12.8155	7.1174	0.912	6.5052	35.0625	113.862	181.247	140.035	94.4088	121.575	104.058	63.0639
111	PANI /TiO2	Training	Aniline	[Ani]	2.15	Potassium persulfate	[KPS]	0.27	/	[/]	0	hydrochloric acid	[HCl]	2300	1	water	[H2O]	55.6	titanium dioxide	[TiO2]	3.1	/	[/]	0	/	[/]	0		0	0	0	0	0	0	2.3095	6.7673	15.2427	20.9095	11.6126	1.488	6.5052	35.9973	117.651	186.017	141.952	94.4088	122.72	106.64	64.7931
112	PANI /TiO2	Training	Aniline	[Ani]	2.15	Potassium persulfate	[KPS]	0.27	/	[/]	0	hydrochloric acid	[HCl]	2300	1	water	[H2O]	55.6	titanium dioxide	[TiO2]	3.1	/	[/]	0	/	[/]	0		0	0	0	0	0	0	2.3095	6.7673	15.2427	20.9095	11.6126	1.488	6.5052	35.9973	117.651	186.017	141.952	94.4088	122.72	106.64	64.7931
113	PANI /TiO2	Test	Aniline	[Ani]	2.15	Potassium persulfate	[KPS]	0.27	/	[/]	0	hydrochloric acid	[HCl]	2300	1	water	[H2O]	55.6	titanium dioxide	[TiO2]	3.1	/	[/]	0	/	[/]	0		0	0	0	0	0	0	2.3095	6.7673	15.2427	20.9095	11.6126	1.488	6.5052	35.9973	117.651	186.017	141.952	94.4088	122.72	106.64	64.7931
114	PANI /TiO2	Test	Aniline	[Ani]	2.15	Potassium persulfate	[KPS]	0.27	/	[/]	0	hydrochloric acid	[HCl]	2300	1	water	[H2O]	55.6	titanium dioxide	[TiO2]	3.1	/	[/]	0	/	[/]	0		0	0	0	0	0	0	2.3095	6.7673	15.2427	20.9095	11.6126	1.488	6.5052	35.9973	117.651	186.017	141.952	94.4088	122.72	106.64	64.7931
115	PANI /TiO2	Training	Aniline	[Ani]	2.15	Potassium persulfate	[KPS]	0.27	/	[/]	0	hydrochloric acid	[HCl]	2300	1	water	[H2O]	55.6	titanium dioxide	[TiO2]	3.1	/	[/]	0	/	[/]	0		0	0	0	0	0	0	2.3095	6.7673	15.2427	20.9095	11.6126	1.488	6.5052	35.9973	117.651	186.017	141.952	94.4088	122.72	106.64	64.7931
116	PANI /TiO2	Training	Aniline	[Ani]	2.15	Potassium persulfate	[KPS]	0.27	/	[/]	0	hydrochloric acid	[HCl]	2300	1	water	[H2O]	55.6	titanium dioxide	[TiO2]	3.1	/	[/]	0	/	[/]	0		0	0	0	0	0	0	2.3095	6.7673	15.2427	20.9095	11.6126	1.488	6.5052	35.9973	117.651	186.017	141.952	94.4088	122.72	106.64	64.7931
117	PANI /TiO2	Training	Aniline	[Ani]	2.15	Potassium persulfate	[KPS]	0.27	/	[/]	0	hydrochloric acid	[HCl]	2300	1	water	[H2O]	55.6	titanium dioxide	[TiO2]	3.1	/	[/]	0	/	[/]	0		0	0	0	0	0	0	2.3095	6.7673	15.2427	20.9095	11.6126	1.488	6.5052	35.9973	117.651	186.017	141.952	94.4088	122.72	106.64	64.7931
118	PANI /TiO2	Training	Aniline	[Ani]	2.15	Potassium persulfate	[KPS]	0.27	/	[/]	0	hydrochloric acid	[HCl]	2300	1	water	[H2O]	55.6	titanium dioxide	[TiO2]	3.1	/	[/]	0	/	[/]	0		0	0	0	0	0	0	2.3095	6.7673	15.2427	20.9095	11.6126	1.488	6.5052	35.9973	117.651	186.017	141.952	94.4088	122.72	106.64	64.7931
119	PANI /TiO2	Training	Aniline	[Ani]	2.15	Potassium persulfate	[KPS]	0.27	/	[/]	0	hydrochloric acid	[HCl]	2300	1	water	[H2O]	55.6	titanium dioxide	[TiO2]	3.1	/	[/]	0	/	[/]	0		0	0	0	0	0	0	2.3095	6.7673	15.2427	20.9095	11.6126	1.488	6.5052	35.9973	117.651	186.017	141.952	94.4088	122.72	106.64	64.7931
120	PANI /TiO2	Training	Aniline	[Ani]	2.15	Potassium persulfate	[KPS]	0.27	/	[/]	0	hydrochloric acid	[HCl]	2300	1	water	[H2O]	55.6	titanium dioxide	[TiO2]	3.1	/	[/]	0	/	[/]	0		0	0	0	0	0	0	2.3095	6.7673	15.2427	20.9095	11.6126	1.488	6.5052	35.9973	117.651	186.017	141.952	94.4088	122.72	106.64	64.7931
121	PANI /TiO2	Training	Aniline	[Ani]	2.15	Potassium persulfate	[KPS]	0.27	/	[/]	0	hydrochloric acid	[HCl]	2300	1	water	[H2O]	55.6	titanium dioxide	[TiO2]	3.1	/	[/]	0	/	[/]	0		0	0	0	0	0	0	2.3095	6.7673	15.2427	20.9095	11.6126	1.488	6.5052	35.9973	117.651	186.017	141.952	94.4088	122.72	106.64	64.7931
122	PANI /TiO2	Test	Aniline	[Ani]	2.15	Potassium persulfate	[KPS]	0.27	/	[/]	0	hydrochloric acid	[HCl]	2300	1	water	[H2O]	55.6	titanium dioxide	[TiO2]	3.1	/	[/]	0	/	[/]	0		0	0	0	0	0	0	2.3095	6.7673	15.2427	20.9095	11.6126	1.488	6.5052	35.9973	117.651	186.017	141.952	94.4088	122.72	106.64	64.7931
123	PANI /TiO2	Training	Aniline	[Ani]	2.15	Potassium persulfate	[KPS]	0.27	/	[/]	0	hydrochloric acid	[HCl]	2300	1	water	[H2O]	55.6	titanium dioxide	[TiO2]	4.4	/	[/]	0	/	[/]	0		0	0	0	0	0	0	3.278	9.6052	21.6348	29.678	16.4824	2.112	6.5052	37.01	121.755	191.184	144.03	94.4088	123.96	109.438	66.6664
124	PANI /TiO2	Training	Aniline	[Ani]	2.15	Potassium persulfate	[KPS]	0.27	/	[/]	0	hydrochloric acid	[HCl]	2300	1	water	[H2O]	55.6	titanium dioxide	[TiO2]	4.4	/	[/]	0	/	[/]	0		0	0	0	0	0	0	3.278	9.6052	21.6348	29.678	16.4824	2.112	6.5052	37.01	121.755	191.184	144.03	94.4088	123.96	109.438	66.6664
125	PANI /TiO2	Training	Aniline	[Ani]	2.15	Potassium persulfate	[KPS]	0.27	/	[/]	0	hydrochloric acid	[HCl]	2300	1	water	[H2O]	55.6	titanium dioxide	[TiO2]	4.4	/	[/]	0	/	[/]	0		0	0	0	0	0	0	3.278	9.6052	21.6348	29.678	16.4824	2.112	6.5052	37.01	121.755	191.184	144.03	94.4088	123.96	109.438	66.6664
126	PANI /TiO2	Training	Aniline	[Ani]	2.15	Potassium persulfate	[KPS]	0.27	/	[/]	0	hydrochloric acid	[HCl]	2300	1	water	[H2O]	55.6	titanium dioxide	[TiO2]	4.4	/	[/]	0	/	[/]	0		0	0	0	0	0	0	3.278	9.6052	21.6348	29.678	16.4824	2.112	6.5052	37.01	121.755	191.184	144.03	94.4088	123.96	109.438	66.6664
127	PANI /TiO2	Training	Aniline	[Ani]	2.15	Potassium persulfate	[KPS]	0.27	/	[/]	0	hydrochloric acid	[HCl]	2300	1	water	[H2O]	55.6	titanium dioxide	[TiO2]	4.4	/	[/]	0	/	[/]	0		0	0	0	0	0	0	3.278	9.6052	21.6348	29.678	16.4824	2.112	6.5052	37.01	121.755	191.184	144.03	94.4088	123.96	109.438	66.6664
128	PANI /TiO2	Training	Aniline	[Ani]	2.15	Potassium persulfate	[KPS]	0.27	/	[/]	0	hydrochloric acid	[HCl]	2300	1	water	[H2O]	55.6	titanium dioxide	[TiO2]	4.4	/	[/]	0	/	[/]	0		0	0	0	0	0	0	3.278	9.6052	21.6348	29.678	16.4824	2.112	6.5052	37.01	121.755	191.184	144.03	94.4088	123.96	109.438	66.6664
129	PANI /TiO2	Training	Aniline	[Ani]	2.15	Potassium persulfate	[KPS]	0.27	/	[/]	0	hydrochloric acid	[HCl]	2300	1	water	[H2O]	55.6	titanium dioxide	[TiO2]	4.4	/	[/]	0	/	[/]	0		0	0	0	0	0	0	3.278	9.6052	21.6348	29.678	16.4824	2.112	6.5052	37.01	121.755	191.184	144.03	94.4088	123.96	109.438	66.6664
130	PANI /TiO2	Training	Aniline	[Ani]	2.15	Potassium persulfate	[KPS]	0.27	/	[/]	0	hydrochloric acid	[HCl]	2300	1	water	[H2O]	55.6	titanium dioxide	[TiO2]	4.4	/	[/]	0	/	[/]	0		0	0	0	0	0	0	3.278	9.6052	21.6348	29.678	16.4824	2.112	6.5052	37.01	121.755	191.184	144.03	94.4088	123.96	109.438	66.6664
131	PANI /TiO2	Training	Aniline	[Ani]	2.15	Potassium persulfate	[KPS]	0.27	/	[/]	0	hydrochloric acid	[HCl]	2300	1	water	[H2O]	55.6	titanium dioxide	[TiO2]	4.4	/	[/]	0	/	[/]	0		0	0	0	0	0	0	3.278	9.6052	21.6348	29.678	16.4824	2.112	6.5052	37.01	121.755	191.184	144.03	94.4088	123.96	109.438	66.6664
132	PANI /TiO2	Training	Aniline	[Ani]	2.15	Potassium persulfate	[KPS]	0.27	/	[/]	0	hydrochloric acid	[HCl]	2300	1	water	[H2O]	55.6	titanium dioxide	[TiO2]	4.4	/	[/]	0	/	[/]	0		0	0	0	0	0	0	3.278	9.6052	21.6348	29.678	16.4824	2.112	6.5052	37.01	121.755	191.184	144.03	94.4088	123.96	109.438	66.6664
133	PANI /TiO2	Training	Aniline	[Ani]	2.15	Potassium persulfate	[KPS]	0.27	/	[/]	0	hydrochloric acid	[HCl]	2300	1	water	[H2O]	55.6	titanium dioxide	[TiO2]	4.4	/	[/]	0	/	[/]	0		0	0	0	0	0	0	3.278	9.6052	21.6348	29.678	16.4824	2.112	6.5052	37.01	121.755	191.184	144.03	94.4088	123.96	109.438	66.6664
134	PANI /TiO2	Training	Aniline	[Ani]	2.15	Potassium persulfate	[KPS]	0.27	/	[/]	0	hydrochloric acid	[HCl]	2300	1	water	[H2O]	55.6	titanium dioxide	[TiO2]	4.4	/	[/]	0	/	[/]	0		0	0	0	0	0	0	3.278	9.6052	21.6348	29.678	16.4824	2.112	6.5052	37.01	121.755	191.184	144.03	94.4088	123.96	109.438	66.6664
135	PANI /TiO2	Test	Aniline	[Ani]	2.15	Potassium persulfate	[KPS]	0.27	/	[/]	0	hydrochloric acid	[HCl]	2300	1	water	[H2O]	55.6	titanium dioxide	[TiO2]	6.3	/	[/]	0	/	[/]	0		0	0	0	0	0	0	4.6935	13.7529	30.9771	42.4935	23.5998	3.024	6.5052	38.4901	127.753	198.737	147.066	94.4088	125.773	113.526	69.4043
136	PANI /TiO2	Test	Aniline	[Ani]	2.15	Potassium persulfate	[KPS]	0.27	/	[/]	0	hydrochloric acid	[HCl]	2300	1	water	[H2O]	55.6	titanium dioxide	[TiO2]	6.3	/	[/]	0	/	[/]	0		0	0	0	0	0	0	4.6935	13.7529	30.9771	42.4935	23.5998	3.024	6.5052	38.4901	127.753	198.737	147.066	94.4088	125.773	113.526	69.4043
137	PANI /TiO2	Test	Aniline	[Ani]	2.15	Potassium persulfate	[KPS]	0.27	/	[/]	0	hydrochloric acid	[HCl]	2300	1	water	[H2O]	55.6	titanium dioxide	[TiO2]	6.3	/	[/]	0	/	[/]	0		0	0	0	0	0	0	4.6935	13.7529	30.9771	42.4935	23.5998	3.024	6.5052	38.4901	127.753	198.737	147.066	94.4088	125.773	113.526	69.4043
138	PANI /TiO2	Training	Aniline	[Ani]	2.15	Potassium persulfate	[KPS]	0.27	/	[/]	0	hydrochloric acid	[HCl]	2300	1	water	[H2O]	55.6	titanium dioxide	[TiO2]	6.3	/	[/]	0	/	[/]	0		0	0	0	0	0	0	4.6935	13.7529	30.9771	42.4935	23.5998	3.024	6.5052	38.4901	127.753	198.737	147.066	94.4088	125.773	113.526	69.4043
139	PANI /TiO2	Training	Aniline	[Ani]	2.15	Potassium persulfate	[KPS]	0.27	/	[/]	0	hydrochloric acid	[HCl]	2300	1	water	[H2O]	55.6	titanium dioxide	[TiO2]	6.3	/	[/]	0	/	[/]	0		0	0	0	0	0	0	4.6935	13.7529	30.9771	42.4935	23.5998	3.024	6.5052	38.4901	127.753	198.737	147.066	94.4088	125.773	113.526	69.4043
140	PANI /TiO2	Training	Aniline	[Ani]	2.15	Potassium persulfate	[KPS]	0.27	/	[/]	0	hydrochloric acid	[HCl]	2300	1	water	[H2O]	55.6	titanium dioxide	[TiO2]	6.3	/	[/]	0	/	[/]	0		0	0	0	0	0	0	4.6935	13.7529	30.9771	42.4935	23.5998	3.024	6.5052	38.4901	127.753	198.737	147.066	94.4088	125.773	113.526	69.4043
141	PANI /TiO2	Training	Aniline	[Ani]	2.15	Potassium persulfate	[KPS]	0.27	/	[/]	0	hydrochloric acid	[HCl]	2300	1	water	[H2O]	55.6	titanium dioxide	[TiO2]	6.3	/	[/]	0	/	[/]	0		0	0	0	0	0	0	4.6935	13.7529	30.9771	42.4935	23.5998	3.024	6.5052	38.4901	127.753	198.737	147.066	94.4088	125.773	113.526	69.4043
142	PANI /TiO2	Training	Aniline	[Ani]	2.15	Potassium persulfate	[KPS]	0.27	/	[/]	0	hydrochloric acid	[HCl]	2300	1	water	[H2O]	55.6	titanium dioxide	[TiO2]	6.3	/	[/]	0	/	[/]	0		0	0	0	0	0	0	4.6935	13.7529	30.9771	42.4935	23.5998	3.024	6.5052	38.4901	127.753	198.737	147.066	94.4088	125.773	113.526	69.4043
143	PANI /TiO2	Training	Aniline	[Ani]	2.15	Potassium persulfate	[KPS]	0.27	/	[/]	0	hydrochloric acid	[HCl]	2300	1	water	[H2O]	55.6	titanium dioxide	[TiO2]	6.3	/	[/]	0	/	[/]	0		0	0	0	0	0	0	4.6935	13.7529	30.9771	42.4935	23.5998	3.024	6.5052	38.4901	127.753	198.737	147.066	94.4088	125.773	113.526	69.4043
144	PANI /TiO2	Test	Aniline	[Ani]	2.15	Potassium persulfate	[KPS]	0.27	/	[/]	0	hydrochloric acid	[HCl]	2300	1	water	[H2O]	55.6	titanium dioxide	[TiO2]	6.3	/	[/]	0	/	[/]	0		0	0	0	0	0	0	4.6935	13.7529	30.9771	42.4935	23.5998	3.024	6.5052	38.4901	127.753	198.737	147.066	94.4088	125.773	113.526	69.4043
145	PANI /TiO2	Training	Aniline	[Ani]	2.15	Potassium persulfate	[KPS]	0.27	/	[/]	0	hydrochloric acid	[HCl]	2300	1	water	[H2O]	55.6	titanium dioxide	[TiO2]	6.3	/	[/]	0	/	[/]	0		0	0	0	0	0	0	4.6935	13.7529	30.9771	42.4935	23.5998	3.024	6.5052	38.4901	127.753	198.737	147.066	94.4088	125.773	113.526	69.4043
146	PANI /TiO2	Training	Aniline	[Ani]	2.15	Potassium persulfate	[KPS]	0.27	/	[/]	0	hydrochloric acid	[HCl]	2300	1	water	[H2O]	55.6	titanium dioxide	[TiO2]	6.3	/	[/]	0	/	[/]	0		0	0	0	0	0	0	4.6935	13.7529	30.9771	42.4935	23.5998	3.024	6.5052	38.4901	127.753	198.737	147.066	94.4088	125.773	113.526	69.4043
147	PANI	Training	Aniline	[Ani]	0.01	Ammonium persulfate	[APS]	0.005	/	[/]	0	hydrochloric acid	[HCl]	50	0.5	water	[H2O]	1.4	ethanol	[C2H5OH]	0.5	/	[/]	0	/	[/]	0		0	0	0	0	0	0	0	0	0	0	0	0	0.2148	1.1081	3.253	4.9176	3.7706	2.7097	3.4876	2.8942	1.7235
148	PANI	Training	Aniline	[Ani]	0.01	Ammonium persulfate	[APS]	0.005	/	[/]	0	selenous acid	[H2SeO3]	50	0.5	water	[H2O]	1.4	ethanol	[C2H5OH]	0.5	/	[/]	0	/	[/]	0		0	0	0	0	0	0	0	0	0	0	0	0	0.2148	1.1081	3.253	4.9176	3.7706	2.7097	3.4876	2.8942	1.7235
149	PANI	Training	Aniline	[Ani]	0.01	Ammonium persulfate	[APS]	0.005	/	[/]	0	selenous acid	[H2SeO3]	50	0.5	water	[H2O]	1.4	ethanol	[C2H5OH]	0.5	/	[/]	0	/	[/]	0		0	0	0	0	0	0	0	0	0	0	0	0	0.2148	1.1081	3.253	4.9176	3.7706	2.7097	3.4876	2.8942	1.7235
150	PANI	Test	Aniline	[Ani]	0.0107	Ammonium persulfate	[APS]	0.0107	/	[/]	0	formic acid	[HCOOH]	50	1	ethanol	[C2H5OH]	1.7	water	[H2O]	5.6	/	[/]	0	/	[/]	0		0	0	0	0	0	0	0	0	0	0	0	0	0.8286	4.2749	12.6898	19.344	14.8898	10.6393	13.6672	11.3506	6.7713
151	PANI	Test	Aniline	[Ani]	0.0002	Ammonium persulfate	[APS]	0.05	/	[/]	0	hydrochloric acid	[HCl]	200	1	water	[H2O]	5.6	ethanol	[C2H5OH]	1.7	/	[/]	0	/	[/]	0		0	0	0	0	0	0	0	0	0	0	0	0	0.8286	4.2749	12.6898	19.344	14.8898	10.6393	13.6672	11.3506	6.7713
152	PANI	Test	Aniline	[Ani]	0.1	Ammonium persulfate	[APS]	0.125	/	[/]	0	hydrochloric acid	[HCl]	100	0.1	sodium 4-dodecylbenzenesulfonic acid	[SDBS]	200	water	[H2O]	56	/	[/]	0	/	[/]	0		0	0	0	0	0	0	70.4	577.2	1154.2	1019.6	570.8	290.4	217.152	248.024	263.44	328.544	364.184	343.888	328.824	329.288	349.16
153	PANI	Training	Aniline	[Ani]	0.1	Ammonium persulfate	[APS]	0.125	/	[/]	0	hydrochloric acid	[HCl]	100	0.1	sodium 4-dodecylbenzenesulfonic acid	[SDBS]	200	water	[H2O]	56	/	[/]	0	/	[/]	0		0	0	0	0	0	0	70.4	577.2	1154.2	1019.6	570.8	290.4	217.152	248.024	263.44	328.544	364.184	343.888	328.824	329.288	349.16
154	PANI	Training	Aniline	[Ani]	0.1	Ammonium persulfate	[APS]	0.125	/	[/]	0	hydrochloric acid	[HCl]	100	0.1	sodium 4-dodecylbenzenesulfonic acid	[SDBS]	200	water	[H2O]	56	/	[/]	0	/	[/]	0		0	0	0	0	0	0	70.4	577.2	1154.2	1019.6	570.8	290.4	217.152	248.024	263.44	328.544	364.184	343.888	328.824	329.288	349.16
155	PANI	Training	Aniline	[Ani]	0.1	Ammonium persulfate	[APS]	0.025	/	[/]	0	hydrochloric acid	[HCl]	420	1	Ammonia solution	[NH4OH]	10.4	N-Methyl-2-pyrrolidone	[C5H9NO]	0.1	/	[/]	0	/	[/]	0		0	0	0	0	0	0	0	0	0	0	0	0	0	0	0.6552	4.0664	9.36	20.3216	41.9432	55.7856	53.6328
156	PANI	Training	Aniline	[Ani]	0.1	Ammonium persulfate	[APS]	0.025	/	[/]	0	hydrochloric acid	[HCl]	200	0.1	ethanol	[C2H5OH]	1.7	/	[/]	0	/	[/]	0	/	[/]	0		0	0	0	0	0	0	0	0	0	0	0	0	0.1734	0.8925	1.8258	1.8496	1.0914	1.1305	1.6048	1.2818	0.6953
157	PANI	Training	Aniline	[Ani]	0.0001	Ammonium persulfate	[APS]	0.1	/	[/]	0	hydrochloric acid	[HCl]	136	4.66	water	[H2O]	27.8	ethanol	[C2H5OH]	8.6	/	[/]	0	/	[/]	0		0	0	0	0	0	0	0	0	0	0	0	0	4.1298	21.3062	63.1684	96.204	74.0204	52.9234	67.9996	56.4688	33.6804
158	PANI	Training	Aniline	[Ani]	0.0001	Ammonium persulfate	[APS]	0.1	/	[/]	0	hydrochloric acid	[HCl]	136	4.66	water	[H2O]	27.8	ethanol	[C2H5OH]	8.6	/	[/]	0	/	[/]	0		0	0	0	0	0	0	0	0	0	0	0	0	4.1298	21.3062	63.1684	96.204	74.0204	52.9234	67.9996	56.4688	33.6804
159	PANI	Test	Aniline	[Ani]	0.0001	Ammonium persulfate	[APS]	0.1	/	[/]	0	hydrochloric acid	[HCl]	136	4.66	water	[H2O]	27.8	ethanol	[C2H5OH]	8.6	/	[/]	0	/	[/]	0		0	0	0	0	0	0	0	0	0	0	0	0	4.1298	21.3062	63.1684	96.204	74.0204	52.9234	67.9996	56.4688	33.6804
160	PANI	Training	Aniline	[Ani]	0.1	Ammonium persulfate	[APS]	0.125	/	[/]	0	hydrochloric acid	[HCl]	100	0.1	sodium 4-dodecylbenzenesulfonic acid	[SDBS]	200	water	[H2O]	56	/	[/]	0	/	[/]	0		0	0	0	0	0	0	70.4	577.2	1154.2	1019.6	570.8	290.4	217.152	248.024	263.44	328.544	364.184	343.888	328.824	329.288	349.16
161	PANI	Training	Aniline	[Ani]	0.0215	Ammonium persulfate	[APS]	0.0215	/	[/]	0	hydrochloric acid	[HCl]	200	1	hydrochloric acid	[HCl]	30	/	[/]	0	/	[/]	0	/	[/]	0		0	0	0	0	0	0	0	0	0	0	0	0.06	10.89	36.81	55.8	46.44	22.53	22.02	28.38	12.27	1.59
162	PANI	Training	Aniline	[Ani]	0.008	Ammonium persulfate	[APS]	0.004	/	[/]	0	hydrochloric acid	[HCl]	190	1	water	[H2O]	5.6	methanol	[CH3OH]	0.2	acetone	[C3H6O]	1.3	sodium dodecylsulfate	[SDS]	2		0	0	0	0	0.026	2.556	12.532	19.582	12.532	4.008	1.462	0.676	1.4228	5.0836	13.3222	19.5194	15.0756	10.4524	12.837	10.6678	6.509
163	PANI	Training	Aniline	[Ani]	0.008	Ammonium persulfate	[APS]	0.004	reduced graphene oxide	[rGO]	0.1	hydrochloric acid	[HCl]	190	1	water	[H2O]	5.6	ammonia solution	[NH4OH]	2.6	methanol	[CH3OH]	2.5	acetone	[C3H6O]	1.3		0	0	0	0	0	0	0	0	0	0	0	0	0.7002	4.5724	13.8303	21.3235	18.8534	17.3592	24.2557	24.8527	19.9967
164	PANI	Training	Aniline	[Ani]	0.008	Ammonium persulfate	[APS]	0.004	/	[/]	0	hydrochloric acid	[HCl]	190	1	water	[H2O]	5.6	methanol	[CH3OH]	0.2	acetone	[C3H6O]	1.3	sodium dodecylsulfate	[SDS]	2		0	0	0	0	0.026	2.556	12.532	19.582	12.532	4.008	1.462	0.676	1.4228	5.0836	13.3222	19.5194	15.0756	10.4524	12.837	10.6678	6.509
165	PANI	Training	Aniline	[Ani]	0.008	Ammonium persulfate	[APS]	0.004	reduced graphene oxide	[rGO]	0.1	hydrochloric acid	[HCl]	190	1	ammonia solution	[NH4OH]	2.6	water	[H2O]	5.6	methanol	[CH3OH]	2.5	acetone	[C3H6O]	1.3		0	0	0	0	0	0	0	0	0	0	0	0	0.7002	4.5724	13.8303	21.3235	18.8534	17.3592	24.2557	24.8527	19.9967
166	PANI	Training	Aniline	[Ani]	0.1	Ammonium persulfate	[APS]	0.1	/	[/]	0	hydrochloric acid	[HCl]	100	1	ethylene glycol	[C2H6O2]	1.8	/	[/]	0	/	[/]	0	/	[/]	0		0	0	0	0	0	0	0	0	0	0	0	0.0396	0.747	1.6974	1.9566	2.439	2.8368	2.4102	2.3076	2.5524	2.3634
167	PANI	Training	Aniline	[Ani]	0.01	Ammonium persulfate	[APS]	0.0027	/	[/]	0	hydrochloric acid	[HCl]	100	1	water	[H2O]	5.6	/	[/]	0	/	[/]	0	/	[/]	0		0	0	0	0	0	0	0	0	0	0	0	0	0.6552	3.3824	10.864	17.4944	13.7984	9.5088	12.0624	10.0688	6.076
168	PANI	Training	Aniline	[Ani]	0.1	Ammonium persulfate	[APS]	0.1	/	[/]	0	camphorsulfonic acid	[C10H16O4S]	200	0.5	hydrochloric acid	[HCl]	200	water	[H2O]	56	methanol	[CH3OH]	2.5	cetyltrimethylammonium bromide	[CTAB]	0.1		0	0	0	0	0	0	0	0	0	0	0	0.4	79.197	280.414	483.447	487.375	290.957	244.779	311.748	183.739	72.5818
169	PANI	Training	Aniline	[Ani]	0.1	Ammonium persulfate	[APS]	0.1	/	[/]	0	camphorsulfonic acid	[C10H16O4S]	200	0.5	hydrochloric acid	[HCl]	200	water	[H2O]	56	methanol	[CH3OH]	2.5	cetyltrimethylammonium bromide	[CTAB]	0.1		0	0	0	0	0	0	0	0	0	0	0	0.4	79.197	280.414	483.447	487.375	290.957	244.779	311.748	183.739	72.5818
170	PANI	Training	Aniline	[Ani]	0.1	Ammonium persulfate	[APS]	0.1	/	[/]	0	camphorsulfonic acid	[C10H16O4S]	200	0.5	hydrochloric acid	[HCl]	200	water	[H2O]	56	methanol	[CH3OH]	2.5	cetyltrimethylammonium bromide	[CTAB]	0.1		0	0	0	0	0	0	0	0	0	0	0	0.4	79.197	280.414	483.447	487.375	290.957	244.779	311.748	183.739	72.5818
171	PANI	Test	Aniline	[Ani]	0.1	Ammonium persulfate	[APS]	0.1	/	[/]	0	camphorsulfonic acid	[C10H16O4S]	200	0.5	hydrochloric acid	[HCl]	200	water	[H2O]	56	methanol	[CH3OH]	2.5	cetyltrimethylammonium bromide	[CTAB]	0.1		0	0	0	0	0	0	0	0	0	0	0	0.4	79.197	280.414	483.447	487.375	290.957	244.779	311.748	183.739	72.5818
172	PANI	Training	Aniline	[Ani]	0.1	Ammonium persulfate	[APS]	0.1	/	[/]	0	camphorsulfonic acid	[C10H16O4S]	200	0.5	hydrochloric acid	[HCl]	200	water	[H2O]	56	methanol	[CH3OH]	2.5	cetyltrimethylammonium bromide	[CTAB]	0.1		0	0	0	0	0	0	0	0	0	0	0	0.4	79.197	280.414	483.447	487.375	290.957	244.779	311.748	183.739	72.5818
173	PANI	Training	Aniline	[Ani]	0.1	Ammonium persulfate	[APS]	0.1	/	[/]	0	camphorsulfonic acid	[C10H16O4S]	200	0.5	hydrochloric acid	[HCl]	200	water	[H2O]	56	methanol	[CH3OH]	2.5	cetyltrimethylammonium bromide	[CTAB]	0.1		0	0	0	0	0	0	0	0	0	0	0	0.4	79.197	280.414	483.447	487.375	290.957	244.779	311.748	183.739	72.5818
174	PANI	Training	Aniline	[Ani]	0.1	Ammonium persulfate	[APS]	0.1	/	[/]	0	camphorsulfonic acid	[C10H16O4S]	200	0.5	hydrochloric acid	[HCl]	200	water	[H2O]	56	methanol	[CH3OH]	2.5	cetyltrimethylammonium bromide	[CTAB]	0.1		0	0	0	0	0	0	0	0	0	0	0	0.4	79.197	280.414	483.447	487.375	290.957	244.779	311.748	183.739	72.5818
175	PANI	Training	Aniline	[Ani]	0.1	Ammonium persulfate	[APS]	0.1	/	[/]	0	camphorsulfonic acid	[C10H16O4S]	200	0.5	hydrochloric acid	[HCl]	200	water	[H2O]	56	methanol	[CH3OH]	2.5	cetyltrimethylammonium bromide	[CTAB]	0.1		0	0	0	0	0	0	0	0	0	0	0	0.4	79.197	280.414	483.447	487.375	290.957	244.779	311.748	183.739	72.5818
176	PANI	Training	Aniline	[Ani]	0.1	Ammonium persulfate	[APS]	0.1	/	[/]	0	camphorsulfonic acid	[C10H16O4S]	200	0.5	hydrochloric acid	[HCl]	200	water	[H2O]	56	methanol	[CH3OH]	2.5	cetyltrimethylammonium bromide	[CTAB]	0.1		0	0	0	0	0	0	0	0	0	0	0	0.4	79.197	280.414	483.447	487.375	290.957	244.779	311.748	183.739	72.5818
177	PANI	Training	Aniline	[Ani]	0.8	Ammonium persulfate	[APS]	0.2	/	[/]	0	hydrochloric acid	[HCl]	200	1	water	[H2O]	11.1	methanol	[CH3OH]	0.2	/	[/]	0	/	[/]	0		0	0	0	0	0	0	0	0	0	0	0	0	1.3023	6.7996	21.7582	34.9014	27.5676	19.0694	24.046	20.0248	12.0845
178	PANI	Training	Aniline	[Ani]	0.8	Ammonium persulfate	[APS]	0.2	/	[/]	0	hydrochloric acid	[HCl]	200	1	water	[H2O]	11.1	methanol	[CH3OH]	0.2	/	[/]	0	/	[/]	0		0	0	0	0	0	0	0	0	0	0	0	0	1.3023	6.7996	21.7582	34.9014	27.5676	19.0694	24.046	20.0248	12.0845
179	PANI	Training	Aniline	[Ani]	0.8	Ammonium persulfate	[APS]	0.2	/	[/]	0	hydrochloric acid	[HCl]	200	1	water	[H2O]	11.1	methanol	[CH3OH]	0.2	/	[/]	0	/	[/]	0		0	0	0	0	0	0	0	0	0	0	0	0	1.3023	6.7996	21.7582	34.9014	27.5676	19.0694	24.046	20.0248	12.0845
180	PANI	Training	Aniline	[Ani]	0.8	Ammonium persulfate	[APS]	0.2	/	[/]	0	hydrochloric acid	[HCl]	200	1	water	[H2O]	11.1	methanol	[CH3OH]	0.2	/	[/]	0	/	[/]	0		0	0	0	0	0	0	0	0	0	0	0	0	1.3023	6.7996	21.7582	34.9014	27.5676	19.0694	24.046	20.0248	12.0845
181	PANI	Training	Aniline	[Ani]	0.8	Ammonium persulfate	[APS]	0.2	/	[/]	0	hydrochloric acid	[HCl]	200	1	water	[H2O]	11.1	methanol	[CH3OH]	0.2	/	[/]	0	/	[/]	0		0	0	0	0	0	0	0	0	0	0	0	0	1.3023	6.7996	21.7582	34.9014	27.5676	19.0694	24.046	20.0248	12.0845
182	PANI	Training	Aniline	[Ani]	0.8	Ammonium persulfate	[APS]	0.2	/	[/]	0	hydrochloric acid	[HCl]	200	1	water	[H2O]	11.1	methanol	[CH3OH]	0.2	/	[/]	0	/	[/]	0		0	0	0	0	0	0	0	0	0	0	0	0	1.3023	6.7996	21.7582	34.9014	27.5676	19.0694	24.046	20.0248	12.0845
183	PANI	Training	Aniline	[Ani]	0.8	Ammonium persulfate	[APS]	0.2	/	[/]	0	hydrochloric acid	[HCl]	200	1	water	[H2O]	11.1	methanol	[CH3OH]	0.2	/	[/]	0	/	[/]	0		0	0	0	0	0	0	0	0	0	0	0	0	1.3023	6.7996	21.7582	34.9014	27.5676	19.0694	24.046	20.0248	12.0845
184	PANI	Training	Aniline	[Ani]	0.8	Ammonium persulfate	[APS]	0.2	/	[/]	0	hydrochloric acid	[HCl]	200	1	water	[H2O]	11.1	methanol	[CH3OH]	0.2	/	[/]	0	/	[/]	0		0	0	0	0	0	0	0	0	0	0	0	0	1.3023	6.7996	21.7582	34.9014	27.5676	19.0694	24.046	20.0248	12.0845
185	PANI	Training	Aniline	[Ani]	0.05	Ammonium persulfate	[APS]	0.02	/	[/]	0	/	[/]	0	0	/	[/]	0	/	[/]	0	/	[/]	0	/	[/]	0		0	0	0	0	0	0	0	0	0	0	0	0	0	0	0	0	0	0	0	0	0
186	PANI	Training	Aniline	[Ani]	0.05	Ammonium persulfate	[APS]	0.02	/	[/]	0	/	[/]	0	0	sodium 4-dodecylbenzenesulfonic acid	[SDBS]	0.05	/	[/]	0	/	[/]	0	/	[/]	0		0	0	0	0	0	0	0.0176	0.1443	0.28855	0.2549	0.1427	0.0726	0.05265	0.05355	0.0387	0.0384	0.05655	0.0622	0.05205	0.05715	0.0721
187	PANI	Training	Aniline	[Ani]	0.01	Potassium persulfate	[KPS]	0.005	/	[/]	0	hydrochloric acid	[HCl]	100	1	water	[H2O]	12.2	methanol	[CH3OH]	2.5	acetone	[C3H6O]	0.1	/	[/]	0		0	0	0	0	0	0	0	0	0	0	0	0	1.4724	8.5588	26.4705	40.9253	32.7758	23.4856	27.9863	22.7731	13.7495
188	PANI	Training	Aniline	[Ani]	0.01	Ammonium persulfate	[APS]	0.01	/	[/]	0	hydrochloric acid	[HCl]	150	1	water	[H2O]	5.6	methanol	[CH3OH]	0.2	/	[/]	0	/	[/]	0		0	0	0	0	0	0	0	0	0	0	0	0	0.6588	3.4776	11.0882	17.7194	14.0156	9.7304	12.199	10.1358	6.117
189	PANI	Training	Aniline	[Ani]	0.5	Ammonium persulfate	[APS]	0.5	/	[/]	0	hydrochloric acid	[HCl]	80	1	dimethyl propylene urea	[C6H12N2O]	0.6	/	[/]	0	/	[/]	0	/	[/]	0		0	0	0	0	0	0	0	0	0	0	0	0	0	0	0	0	0	0	0	0	0
190	PANI	Training	Aniline	[Ani]	0.5	Ammonium persulfate	[APS]	0.5	/	[/]	0	hydrochloric acid	[HCl]	80	1	dimethyl propylene urea	[C6H12N2O]	0.6	/	[/]	0	/	[/]	0	/	[/]	0		0	0	0	0	0	0	0	0	0	0	0	0	0	0	0	0	0	0	0	0	0
191	PANI	Training	Aniline	[Ani]	0.5	Ammonium persulfate	[APS]	0.5	/	[/]	0	hydrochloric acid	[HCl]	80	1	dimethyl propylene urea	[C6H12N2O]	0.6	/	[/]	0	/	[/]	0	/	[/]	0		0	0	0	0	0	0	0	0	0	0	0	0	0	0	0	0	0	0	0	0	0
192	PANI	Training	Aniline	[Ani]	0.5	Ammonium persulfate	[APS]	0.5	/	[/]	0	hydrochloric acid	[HCl]	80	1	dimethyl propylene urea	[C6H12N2O]	0.6	/	[/]	0	/	[/]	0	/	[/]	0		0	0	0	0	0	0	0	0	0	0	0	0	0	0	0	0	0	0	0	0	0
193	PANI	Training	Aniline	[Ani]	0.5	Ammonium persulfate	[APS]	0.5	/	[/]	0	hydrochloric acid	[HCl]	80	1	dimethyl propylene urea	[C6H12N2O]	0.6	/	[/]	0	/	[/]	0	/	[/]	0		0	0	0	0	0	0	0	0	0	0	0	0	0	0	0	0	0	0	0	0	0
194	PANI	Training	Aniline	[Ani]	0.5	Ammonium persulfate	[APS]	0.5	/	[/]	0	hydrochloric acid	[HCl]	80	1	dimethyl propylene urea	[C6H12N2O]	0.6	/	[/]	0	/	[/]	0	/	[/]	0		0	0	0	0	0	0	0	0	0	0	0	0	0	0	0	0	0	0	0	0	0
195	PANI	Test	Aniline	[Ani]	0.5	Ammonium persulfate	[APS]	0.5	/	[/]	0	hydrochloric acid	[HCl]	80	1	dimethyl propylene urea	[C6H12N2O]	0.6	/	[/]	0	/	[/]	0	/	[/]	0		0	0	0	0	0	0	0	0	0	0	0	0	0	0	0	0	0	0	0	0	0
196	PANI	Training	Aniline	[Ani]	0.5	Ammonium persulfate	[APS]	0.5	/	[/]	0	hydrochloric acid	[HCl]	80	1	dimethyl propylene urea	[C6H12N2O]	0.6	/	[/]	0	/	[/]	0	/	[/]	0		0	0	0	0	0	0	0	0	0	0	0	0	0	0	0	0	0	0	0	0	0
197	PANI	Training	Aniline	[Ani]	0.5	Ammonium persulfate	[APS]	0.5	/	[/]	0	hydrochloric acid	[HCl]	80	1	dimethyl propylene urea	[C6H12N2O]	0.6	/	[/]	0	/	[/]	0	/	[/]	0		0	0	0	0	0	0	0	0	0	0	0	0	0	0	0	0	0	0	0	0	0
198	PANI	Training	Aniline	[Ani]	0.5	Ammonium persulfate	[APS]	0.5	/	[/]	0	hydrochloric acid	[HCl]	80	1	dimethyl propylene urea	[C6H12N2O]	0.6	/	[/]	0	/	[/]	0	/	[/]	0		0	0	0	0	0	0	0	0	0	0	0	0	0	0	0	0	0	0	0	0	0
199	PANI	Test	Aniline	[Ani]	0.5	Ammonium persulfate	[APS]	0.5	/	[/]	0	hydrochloric acid	[HCl]	80	1	dimethyl propylene urea	[C6H12N2O]	0.6	/	[/]	0	/	[/]	0	/	[/]	0		0	0	0	0	0	0	0	0	0	0	0	0	0	0	0	0	0	0	0	0	0
200	PANI	Training	Aniline	[Ani]	0.5	Ammonium persulfate	[APS]	0.5	/	[/]	0	hydrochloric acid	[HCl]	80	1	dimethyl propylene urea	[C6H12N2O]	0.6	/	[/]	0	/	[/]	0	/	[/]	0		0	0	0	0	0	0	0	0	0	0	0	0	0	0	0	0	0	0	0	0	0
201	PANI	Training	Aniline	[Ani]	0.5	Ammonium persulfate	[APS]	0.5	/	[/]	0	hydrochloric acid	[HCl]	80	1	dimethyl propylene urea	[C6H12N2O]	0.6	/	[/]	0	/	[/]	0	/	[/]	0		0	0	0	0	0	0	0	0	0	0	0	0	0	0	0	0	0	0	0	0	0
202	PANI	Test	Aniline	[Ani]	0.5	Ammonium persulfate	[APS]	0.5	/	[/]	0	hydrochloric acid	[HCl]	80	1	dimethyl propylene urea	[C6H12N2O]	0.6	/	[/]	0	/	[/]	0	/	[/]	0		0	0	0	0	0	0	0	0	0	0	0	0	0	0	0	0	0	0	0	0	0
203	PANI	Training	Aniline	[Ani]	0.5	Ammonium persulfate	[APS]	0.5	/	[/]	0	hydrochloric acid	[HCl]	80	1	dimethyl propylene urea	[C6H12N2O]	0.6	/	[/]	0	/	[/]	0	/	[/]	0		0	0	0	0	0	0	0	0	0	0	0	0	0	0	0	0	0	0	0	0	0
204	PANI	Test	Aniline	[Ani]	0.5	Ammonium persulfate	[APS]	0.5	/	[/]	0	hydrochloric acid	[HCl]	80	1	dimethyl propylene urea	[C6H12N2O]	0.6	/	[/]	0	/	[/]	0	/	[/]	0		0	0	0	0	0	0	0	0	0	0	0	0	0	0	0	0	0	0	0	0	0
205	PANI	Test	Aniline	[Ani]	0.5	Ammonium persulfate	[APS]	0.5	/	[/]	0	hydrochloric acid	[HCl]	80	1	dimethyl propylene urea	[C6H12N2O]	0.6	/	[/]	0	/	[/]	0	/	[/]	0		0	0	0	0	0	0	0	0	0	0	0	0	0	0	0	0	0	0	0	0	0
206	PANI	Training	Aniline	[Ani]	0.5	Ammonium persulfate	[APS]	0.5	/	[/]	0	hydrochloric acid	[HCl]	80	1	dimethyl propylene urea	[C6H12N2O]	0.6	/	[/]	0	/	[/]	0	/	[/]	0		0	0	0	0	0	0	0	0	0	0	0	0	0	0	0	0	0	0	0	0	0
207	PANI	Training	Aniline	[Ani]	0.5	Ammonium persulfate	[APS]	0.5	/	[/]	0	hydrochloric acid	[HCl]	80	1	dimethyl propylene urea	[C6H12N2O]	0.6	/	[/]	0	/	[/]	0	/	[/]	0		0	0	0	0	0	0	0	0	0	0	0	0	0	0	0	0	0	0	0	0	0
208	PANI	Training	Aniline	[Ani]	0.5	Ammonium persulfate	[APS]	0.5	/	[/]	0	hydrochloric acid	[HCl]	80	1	dimethyl propylene urea	[C6H12N2O]	0.6	/	[/]	0	/	[/]	0	/	[/]	0		0	0	0	0	0	0	0	0	0	0	0	0	0	0	0	0	0	0	0	0	0
209	PANI	Training	Aniline	[Ani]	0.5	Ammonium persulfate	[APS]	0.5	/	[/]	0	hydrochloric acid	[HCl]	80	1	dimethyl propylene urea	[C6H12N2O]	0.6	/	[/]	0	/	[/]	0	/	[/]	0		0	0	0	0	0	0	0	0	0	0	0	0	0	0	0	0	0	0	0	0	0
210	PANI	Training	Aniline	[Ani]	0.5	Ammonium persulfate	[APS]	0.5	/	[/]	0	hydrochloric acid	[HCl]	80	1	dimethyl propylene urea	[C6H12N2O]	0.6	/	[/]	0	/	[/]	0	/	[/]	0		0	0	0	0	0	0	0	0	0	0	0	0	0	0	0	0	0	0	0	0	0
211	PANI	Training	Aniline	[Ani]	0.5	Ammonium persulfate	[APS]	0.5	/	[/]	0	hydrochloric acid	[HCl]	80	1	dimethyl propylene urea	[C6H12N2O]	0.6	/	[/]	0	/	[/]	0	/	[/]	0		0	0	0	0	0	0	0	0	0	0	0	0	0	0	0	0	0	0	0	0	0
212	PANI	Training	Aniline	[Ani]	0.5	Ammonium persulfate	[APS]	0.5	/	[/]	0	hydrochloric acid	[HCl]	80	1	dimethyl propylene urea	[C6H12N2O]	0.6	/	[/]	0	/	[/]	0	/	[/]	0		0	0	0	0	0	0	0	0	0	0	0	0	0	0	0	0	0	0	0	0	0
213	PANI	Training	Aniline	[Ani]	0.5	Ammonium persulfate	[APS]	0.5	/	[/]	0	hydrochloric acid	[HCl]	80	1	dimethyl propylene urea	[C6H12N2O]	0.6	/	[/]	0	/	[/]	0	/	[/]	0		0	0	0	0	0	0	0	0	0	0	0	0	0	0	0	0	0	0	0	0	0
214	PANI	Training	Aniline	[Ani]	0.5	Ammonium persulfate	[APS]	0.5	/	[/]	0	hydrochloric acid	[HCl]	80	1	dimethyl propylene urea	[C6H12N2O]	0.6	/	[/]	0	/	[/]	0	/	[/]	0		0	0	0	0	0	0	0	0	0	0	0	0	0	0	0	0	0	0	0	0	0
215	PANI	Training	Aniline	[Ani]	0.5	Ammonium persulfate	[APS]	0.5	/	[/]	0	hydrochloric acid	[HCl]	80	1	dimethyl propylene urea	[C6H12N2O]	0.6	/	[/]	0	/	[/]	0	/	[/]	0		0	0	0	0	0	0	0	0	0	0	0	0	0	0	0	0	0	0	0	0	0
216	PANI	Training	Aniline	[Ani]	0.5	Ammonium persulfate	[APS]	0.5	/	[/]	0	hydrochloric acid	[HCl]	80	1	dimethyl propylene urea	[C6H12N2O]	0.6	/	[/]	0	/	[/]	0	/	[/]	0		0	0	0	0	0	0	0	0	0	0	0	0	0	0	0	0	0	0	0	0	0
217	PANI	Training	Aniline	[Ani]	0.5	Ammonium persulfate	[APS]	0.5	/	[/]	0	hydrochloric acid	[HCl]	80	1	dimethyl propylene urea	[C6H12N2O]	0.6	/	[/]	0	/	[/]	0	/	[/]	0		0	0	0	0	0	0	0	0	0	0	0	0	0	0	0	0	0	0	0	0	0
218	PANI	Training	Aniline	[Ani]	0.5	Ammonium persulfate	[APS]	0.5	/	[/]	0	hydrochloric acid	[HCl]	80	1	dimethyl propylene urea	[C6H12N2O]	0.6	/	[/]	0	/	[/]	0	/	[/]	0		0	0	0	0	0	0	0	0	0	0	0	0	0	0	0	0	0	0	0	0	0
219	PANI	Test	Aniline	[Ani]	0.5	Ammonium persulfate	[APS]	0.5	/	[/]	0	hydrochloric acid	[HCl]	80	1	dimethyl propylene urea	[C6H12N2O]	0.6	/	[/]	0	/	[/]	0	/	[/]	0		0	0	0	0	0	0	0	0	0	0	0	0	0	0	0	0	0	0	0	0	0
220	PANI	Training	Aniline	[Ani]	0.5	Ammonium persulfate	[APS]	0.5	/	[/]	0	hydrochloric acid	[HCl]	80	1	dimethyl propylene urea	[C6H12N2O]	0.6	/	[/]	0	/	[/]	0	/	[/]	0		0	0	0	0	0	0	0	0	0	0	0	0	0	0	0	0	0	0	0	0	0
221	PANI	Training	Aniline	[Ani]	0.5	Ammonium persulfate	[APS]	0.5	/	[/]	0	hydrochloric acid	[HCl]	80	1	dimethyl propylene urea	[C6H12N2O]	0.6	/	[/]	0	/	[/]	0	/	[/]	0		0	0	0	0	0	0	0	0	0	0	0	0	0	0	0	0	0	0	0	0	0
222	PANI	Test	Aniline	[Ani]	0.5	Ammonium persulfate	[APS]	0.5	/	[/]	0	hydrochloric acid	[HCl]	80	1	dimethyl propylene urea	[C6H12N2O]	0.6	/	[/]	0	/	[/]	0	/	[/]	0		0	0	0	0	0	0	0	0	0	0	0	0	0	0	0	0	0	0	0	0	0
223	PANI	Training	Aniline	[Ani]	0.01	Ammonium persulfate	[APS]	0.03	/	[/]	0	sulferic acid	[H2SO4]	10	1	water	[H2O]	5.6	hexane	[C6H14]	0.1	/	[/]	0	/	[/]	0		0	0	0	0	0	0	0	0	0	0	0	0	0.6552	3.3824	10.864	17.4944	13.7984	9.5088	12.0624	10.0688	6.076
224	PANI	Training	Aniline	[Ani]	0.01	Ammonium persulfate	[APS]	0.03	/	[/]	0	sulferic acid	[H2SO4]	10	1	water	[H2O]	5.6	hexane	[C6H14]	0.1	/	[/]	0	/	[/]	0		0	0	0	0	0	0	0	0	0	0	0	0	0.6552	3.3824	10.864	17.4944	13.7984	9.5088	12.0624	10.0688	6.076
225	PANI	Training	Aniline	[Ani]	0.01	Ammonium persulfate	[APS]	0.03	/	[/]	0	sulferic acid	[H2SO4]	10	1	water	[H2O]	5.6	hexane	[C6H14]	0.1	/	[/]	0	/	[/]	0		0	0	0	0	0	0	0	0	0	0	0	0	0.6552	3.3824	10.864	17.4944	13.7984	9.5088	12.0624	10.0688	6.076
226	PANI	Test	Aniline	[Ani]	0.01	Ammonium persulfate	[APS]	0.03	/	[/]	0	sulferic acid	[H2SO4]	10	1	water	[H2O]	5.6	hexane	[C6H14]	0.1	/	[/]	0	/	[/]	0		0	0	0	0	0	0	0	0	0	0	0	0	0.6552	3.3824	10.864	17.4944	13.7984	9.5088	12.0624	10.0688	6.076
227	PANI	Training	Aniline	[Ani]	0.01	Ammonium persulfate	[APS]	0.03	/	[/]	0	sulferic acid	[H2SO4]	10	1	water	[H2O]	5.6	hexane	[C6H14]	0.1	/	[/]	0	/	[/]	0		0	0	0	0	0	0	0	0	0	0	0	0	0.6552	3.3824	10.864	17.4944	13.7984	9.5088	12.0624	10.0688	6.076
228	PANI	Test	Aniline	[Ani]	0.01	Ammonium persulfate	[APS]	0.03	/	[/]	0	sulferic acid	[H2SO4]	10	1	water	[H2O]	5.6	hexane	[C6H14]	0.1	/	[/]	0	/	[/]	0		0	0	0	0	0	0	0	0	0	0	0	0	0.6552	3.3824	10.864	17.4944	13.7984	9.5088	12.0624	10.0688	6.076
229	PANI	Training	Aniline	[Ani]	0.01	Ammonium persulfate	[APS]	0.03	/	[/]	0	sulferic acid	[H2SO4]	10	1	water	[H2O]	5.6	hexane	[C6H14]	0.1	/	[/]	0	/	[/]	0		0	0	0	0	0	0	0	0	0	0	0	0	0.6552	3.3824	10.864	17.4944	13.7984	9.5088	12.0624	10.0688	6.076
230	PANI	Training	Aniline	[Ani]	0.01	Ammonium persulfate	[APS]	0.03	/	[/]	0	sulferic acid	[H2SO4]	10	1	water	[H2O]	5.6	hexane	[C6H14]	0.1	/	[/]	0	/	[/]	0		0	0	0	0	0	0	0	0	0	0	0	0	0.6552	3.3824	10.864	17.4944	13.7984	9.5088	12.0624	10.0688	6.076
231	PANI	Training	Aniline	[Ani]	0.01	Ammonium persulfate	[APS]	0.03	/	[/]	0	sulferic acid	[H2SO4]	10	1	water	[H2O]	5.6	hexane	[C6H14]	0.1	/	[/]	0	/	[/]	0		0	0	0	0	0	0	0	0	0	0	0	0	0.6552	3.3824	10.864	17.4944	13.7984	9.5088	12.0624	10.0688	6.076
232	PANI	Training	Aniline	[Ani]	0.01	Ammonium persulfate	[APS]	0.03	/	[/]	0	sulferic acid	[H2SO4]	10	1	water	[H2O]	5.6	hexane	[C6H14]	0.1	/	[/]	0	/	[/]	0		0	0	0	0	0	0	0	0	0	0	0	0	0.6552	3.3824	10.864	17.4944	13.7984	9.5088	12.0624	10.0688	6.076
233	PANI	Training	Aniline	[Ani]	0.01	Ammonium persulfate	[APS]	0.03	/	[/]	0	sulferic acid	[H2SO4]	10	1	water	[H2O]	5.6	hexane	[C6H14]	0.1	/	[/]	0	/	[/]	0		0	0	0	0	0	0	0	0	0	0	0	0	0.6552	3.3824	10.864	17.4944	13.7984	9.5088	12.0624	10.0688	6.076
234	PANI	Training	Aniline	[Ani]	0.01	Ammonium persulfate	[APS]	0.03	/	[/]	0	sulferic acid	[H2SO4]	10	1	water	[H2O]	5.6	hexane	[C6H14]	0.1	/	[/]	0	/	[/]	0		0	0	0	0	0	0	0	0	0	0	0	0	0.6552	3.3824	10.864	17.4944	13.7984	9.5088	12.0624	10.0688	6.076
235	PANI	Training	Aniline	[Ani]	0.01	Ammonium persulfate	[APS]	0.03	/	[/]	0	sulferic acid	[H2SO4]	10	1	water	[H2O]	5.6	hexane	[C6H14]	0.1	/	[/]	0	/	[/]	0		0	0	0	0	0	0	0	0	0	0	0	0	0.6552	3.3824	10.864	17.4944	13.7984	9.5088	12.0624	10.0688	6.076
236	PANI	Training	Aniline	[Ani]	0.01	Ammonium persulfate	[APS]	0.03	/	[/]	0	sulferic acid	[H2SO4]	10	1	water	[H2O]	5.6	hexane	[C6H14]	0.1	/	[/]	0	/	[/]	0		0	0	0	0	0	0	0	0	0	0	0	0	0.6552	3.3824	10.864	17.4944	13.7984	9.5088	12.0624	10.0688	6.076
237	PANI	Training	Aniline	[Ani]	0.01	Ammonium persulfate	[APS]	0.03	/	[/]	0	sulferic acid	[H2SO4]	10	1	water	[H2O]	5.6	hexane	[C6H14]	0.1	/	[/]	0	/	[/]	0		0	0	0	0	0	0	0	0	0	0	0	0	0.6552	3.3824	10.864	17.4944	13.7984	9.5088	12.0624	10.0688	6.076
238	PANI	Training	Aniline	[Ani]	0.01	Ammonium persulfate	[APS]	0.03	/	[/]	0	sulferic acid	[H2SO4]	10	1	water	[H2O]	5.6	hexane	[C6H14]	0.1	/	[/]	0	/	[/]	0		0	0	0	0	0	0	0	0	0	0	0	0	0.6552	3.3824	10.864	17.4944	13.7984	9.5088	12.0624	10.0688	6.076
239	PANI	Test	Aniline	[Ani]	0.01	Ammonium persulfate	[APS]	0.03	/	[/]	0	sulferic acid	[H2SO4]	10	1	water	[H2O]	5.6	hexane	[C6H14]	0.1	/	[/]	0	/	[/]	0		0	0	0	0	0	0	0	0	0	0	0	0	0.6552	3.3824	10.864	17.4944	13.7984	9.5088	12.0624	10.0688	6.076
240	PANI	Training	Aniline	[Ani]	0.01	Ammonium persulfate	[APS]	0.03	/	[/]	0	sulferic acid	[H2SO4]	10	1	water	[H2O]	5.6	hexane	[C6H14]	0.1	/	[/]	0	/	[/]	0		0	0	0	0	0	0	0	0	0	0	0	0	0.6552	3.3824	10.864	17.4944	13.7984	9.5088	12.0624	10.0688	6.076
241	PANI	Training	Aniline	[Ani]	0.01	Ammonium persulfate	[APS]	0.03	/	[/]	0	sulferic acid	[H2SO4]	10	1	water	[H2O]	5.6	hexane	[C6H14]	0.1	/	[/]	0	/	[/]	0		0	0	0	0	0	0	0	0	0	0	0	0	0.6552	3.3824	10.864	17.4944	13.7984	9.5088	12.0624	10.0688	6.076
242	PANI	Training	Aniline	[Ani]	0.01	Ammonium persulfate	[APS]	0.03	/	[/]	0	sulferic acid	[H2SO4]	10	1	water	[H2O]	5.6	hexane	[C6H14]	0.1	/	[/]	0	/	[/]	0		0	0	0	0	0	0	0	0	0	0	0	0	0.6552	3.3824	10.864	17.4944	13.7984	9.5088	12.0624	10.0688	6.076
243	PANI	Test	Aniline	[Ani]	0.01	Ammonium persulfate	[APS]	0.03	/	[/]	0	sulferic acid	[H2SO4]	10	1	water	[H2O]	5.6	hexane	[C6H14]	0.1	/	[/]	0	/	[/]	0		0	0	0	0	0	0	0	0	0	0	0	0	0.6552	3.3824	10.864	17.4944	13.7984	9.5088	12.0624	10.0688	6.076
244	PANI	Training	Aniline	[Ani]	0.01	Ammonium persulfate	[APS]	0.03	/	[/]	0	sulferic acid	[H2SO4]	10	1	water	[H2O]	5.6	hexane	[C6H14]	0.1	/	[/]	0	/	[/]	0		0	0	0	0	0	0	0	0	0	0	0	0	0.6552	3.3824	10.864	17.4944	13.7984	9.5088	12.0624	10.0688	6.076
245	PANI	Training	Aniline	[Ani]	0.01	Ammonium persulfate	[APS]	0.03	/	[/]	0	sulferic acid	[H2SO4]	10	1	water	[H2O]	5.6	hexane	[C6H14]	0.1	/	[/]	0	/	[/]	0		0	0	0	0	0	0	0	0	0	0	0	0	0.6552	3.3824	10.864	17.4944	13.7984	9.5088	12.0624	10.0688	6.076
246	PANI	Training	Aniline	[Ani]	0.01	Ammonium persulfate	[APS]	0.03	/	[/]	0	sulferic acid	[H2SO4]	10	1	water	[H2O]	5.6	hexane	[C6H14]	0.1	/	[/]	0	/	[/]	0		0	0	0	0	0	0	0	0	0	0	0	0	0.6552	3.3824	10.864	17.4944	13.7984	9.5088	12.0624	10.0688	6.076
247	PANI	Training	Aniline	[Ani]	0.01	Ammonium persulfate	[APS]	0.03	/	[/]	0	sulferic acid	[H2SO4]	10	1	water	[H2O]	5.6	hexane	[C6H14]	0.1	/	[/]	0	/	[/]	0		0	0	0	0	0	0	0	0	0	0	0	0	0.6552	3.3824	10.864	17.4944	13.7984	9.5088	12.0624	10.0688	6.076
248	PANI	Training	Aniline	[Ani]	0.01	Ammonium persulfate	[APS]	0.03	/	[/]	0	sulferic acid	[H2SO4]	10	1	water	[H2O]	5.6	hexane	[C6H14]	0.1	/	[/]	0	/	[/]	0		0	0	0	0	0	0	0	0	0	0	0	0	0.6552	3.3824	10.864	17.4944	13.7984	9.5088	12.0624	10.0688	6.076
249	PANI	Training	Aniline	[Ani]	0.01	Ammonium persulfate	[APS]	0.03	/	[/]	0	sulferic acid	[H2SO4]	10	1	water	[H2O]	5.6	hexane	[C6H14]	0.1	/	[/]	0	/	[/]	0		0	0	0	0	0	0	0	0	0	0	0	0	0.6552	3.3824	10.864	17.4944	13.7984	9.5088	12.0624	10.0688	6.076
250	PANI	Test	Aniline	[Ani]	0.0025	Ammonium persulfate	[APS]	0.0025	/	[/]	0	hydrochloric acid	[HCl]	45	1	/	[/]	0	/	[/]	0	/	[/]	0	/	[/]	0		0	0	0	0	0	0	0	0	0	0	0	0	0	0	0	0	0	0	0	0	0
251	PANI	Training	Aniline	[Ani]	0.0025	Ammonium persulfate	[APS]	0.0025	/	[/]	0	hydrochloric acid	[HCl]	45	1	/	[/]	0	/	[/]	0	/	[/]	0	/	[/]	0		0	0	0	0	0	0	0	0	0	0	0	0	0	0	0	0	0	0	0	0	0
252	PANI	Training	Aniline	[Ani]	0.0025	Ammonium persulfate	[APS]	0.0025	/	[/]	0	hydrochloric acid	[HCl]	45	1	/	[/]	0	/	[/]	0	/	[/]	0	/	[/]	0		0	0	0	0	0	0	0	0	0	0	0	0	0	0	0	0	0	0	0	0	0
253	PANI	Training	Aniline	[Ani]	0.0025	Ammonium persulfate	[APS]	0.0025	/	[/]	0	hydrochloric acid	[HCl]	45	1	/	[/]	0	/	[/]	0	/	[/]	0	/	[/]	0		0	0	0	0	0	0	0	0	0	0	0	0	0	0	0	0	0	0	0	0	0
254	PANI	Training	Aniline	[Ani]	0.004	Ammonium persulfate	[APS]	0.004	/	[/]	0	hydrochloric acid	[HCl]	100	1	chloroform	[CHCl3]	0.2	/	[/]	0	/	[/]	0	/	[/]	0		0	0	0	0	0	0	0	0	0	0	0	0	0	0	0	0	0.0452	0.2758	0.499	0.3892	0.2436
255	PANI	Training	Aniline	[Ani]	0.5	Ammonium persulfate	[APS]	0.5	/	[/]	0	/	[/]	0	0	hydrochloric acid	[HCl]	6.6	m-cresol	[C7H8O]	0.1	/	[/]	0	/	[/]	0		0	0	0	0	0	0	0	0	0	0.0035	0.0154	0.0723	2.5112	8.2021	12.3545	10.3059	5.0413	4.9329	6.3365	2.7717	0.397
256	PANI	Training	Aniline	[Ani]	0.5	Ammonium persulfate	[APS]	0.5	/	[/]	0	p-toluenesulfonic acid	[C7H8O3S]	15	1	hydrochloric acid	[HCl]	6.6	m-cresol	[C7H8O]	0.1	/	[/]	0	/	[/]	0		0	0	0	0	0	0	0	0	0	0.0035	0.0154	0.0723	2.5112	8.2021	12.3545	10.3059	5.0413	4.9329	6.3365	2.7717	0.397
257	PANI	Training	Aniline	[Ani]	0.1	Ammonium persulfate	[APS]	0.15	/	[/]	0	p-toluenesulfonic acid	[C7H8O3S]	100	0.4	water	[H2O]	55.6	/	[/]	0	/	[/]	0	/	[/]	0		0	0	0	0	0	0	0	0	0	0	0	0	6.5052	33.5824	107.864	173.694	136.998	94.4088	119.762	99.9688	60.326
258	PANI	Training	Aniline	[Ani]	0.02	Ammonium persulfate	[APS]	0.05	/	[/]	0	hydrochloric acid	[HCl]	500	1	/	[/]	0	/	[/]	0	/	[/]	0	/	[/]	0		0	0	0	0	0	0	0	0	0	0	0	0	0	0	0	0	0	0	0	0	0
259	PANI/Gr	Training	Aniline	[Ani]	0.01	Ammonium persulfate	[APS]	0.005	graphene	[Gr]	0.5	hydrochloric acid	[HCl]	50	0.5	ethanol	[C2H5OH]	0.5	/	[/]	0	/	[/]	0	/	[/]	0		0	0	0	0	0	0	0	0	0	0	0	0	0.051	0.2625	0.537	0.544	0.321	0.3325	0.472	0.377	0.2045
260	PANI/Gr	Training	Aniline	[Ani]	0.01	Ammonium persulfate	[APS]	0.005	graphene	[Gr]	1	hydrochloric acid	[HCl]	50	0.5	ethanol	[C2H5OH]	0.5	/	[/]	0	/	[/]	0	/	[/]	0		0	0	0	0	0	0	0	0	0	0	0	0	0.051	0.2625	0.537	0.544	0.321	0.3325	0.472	0.377	0.2045
261	PANI/Gr	Training	Aniline	[Ani]	0.01	Ammonium persulfate	[APS]	0.005	graphene	[Gr]	3	hydrochloric acid	[HCl]	50	0.5	ethanol	[C2H5OH]	0.5	/	[/]	0	/	[/]	0	/	[/]	0		0	0	0	0	0	0	0	0	0	0	0	0	0.051	0.2625	0.537	0.544	0.321	0.3325	0.472	0.377	0.2045
262	PANI/Gr	Training	Aniline	[Ani]	0.01	Ammonium persulfate	[APS]	0.005	graphene	[Gr]	5	hydrochloric acid	[HCl]	50	0.5	ethanol	[C2H5OH]	0.5	/	[/]	0	/	[/]	0	/	[/]	0		0	0	0	0	0	0	0	0	0	0	0	0	0.051	0.2625	0.537	0.544	0.321	0.3325	0.472	0.377	0.2045
263	PANI/Gr	Test	Aniline	[Ani]	0.01	Ammonium persulfate	[APS]	0.005	graphene	[Gr]	0.5	selenous acid	[H2SeO3]	50	0.5	ethanol	[C2H5OH]	0.5	/	[/]	0	/	[/]	0	/	[/]	0		0	0	0	0	0	0	0	0	0	0	0	0	0.051	0.2625	0.537	0.544	0.321	0.3325	0.472	0.377	0.2045
264	PANI/Gr	Training	Aniline	[Ani]	0.01	Ammonium persulfate	[APS]	0.005	graphene	[Gr]	1	selenous acid	[H2SeO3]	50	0.5	ethanol	[C2H5OH]	0.5	/	[/]	0	/	[/]	0	/	[/]	0		0	0	0	0	0	0	0	0	0	0	0	0	0.051	0.2625	0.537	0.544	0.321	0.3325	0.472	0.377	0.2045
265	PANI/Gr	Training	Aniline	[Ani]	0.01	Ammonium persulfate	[APS]	0.005	graphene	[Gr]	3	selenous acid	[H2SeO3]	50	0.5	ethanol	[C2H5OH]	0.5	/	[/]	0	/	[/]	0	/	[/]	0		0	0	0	0	0	0	0	0	0	0	0	0	0.051	0.2625	0.537	0.544	0.321	0.3325	0.472	0.377	0.2045
266	PANI/Gr	Training	Aniline	[Ani]	0.01	Ammonium persulfate	[APS]	0.005	graphene	[Gr]	5	selenous acid	[H2SeO3]	50	0.5	ethanol	[C2H5OH]	0.5	/	[/]	0	/	[/]	0	/	[/]	0		0	0	0	0	0	0	0	0	0	0	0	0	0.051	0.2625	0.537	0.544	0.321	0.3325	0.472	0.377	0.2045
267	PANI/Gr	Training	Aniline	[Ani]	0.01	Ammonium persulfate	[APS]	0.005	graphene	[Gr]	0.5	selenous acid	[H2SeO3]	50	0.5	ethanol	[C2H5OH]	0.5	/	[/]	0	/	[/]	0	/	[/]	0		0	0	0	0	0	0	0	0	0	0	0	0	0.051	0.2625	0.537	0.544	0.321	0.3325	0.472	0.377	0.2045
268	PANI/Gr	Training	Aniline	[Ani]	0.01	Ammonium persulfate	[APS]	0.005	graphene	[Gr]	1	selenous acid	[H2SeO3]	50	0.5	ethanol	[C2H5OH]	0.5	/	[/]	0	/	[/]	0	/	[/]	0		0	0	0	0	0	0	0	0	0	0	0	0	0.051	0.2625	0.537	0.544	0.321	0.3325	0.472	0.377	0.2045
269	PANI/Gr	Training	Aniline	[Ani]	0.01	Ammonium persulfate	[APS]	0.005	graphene	[Gr]	3	selenous acid	[H2SeO3]	50	0.5	ethanol	[C2H5OH]	0.5	/	[/]	0	/	[/]	0	/	[/]	0		0	0	0	0	0	0	0	0	0	0	0	0	0.051	0.2625	0.537	0.544	0.321	0.3325	0.472	0.377	0.2045
270	PANI/Gr	Training	Aniline	[Ani]	0.01	Ammonium persulfate	[APS]	0.005	graphene	[Gr]	5	selenous acid	[H2SeO3]	50	0.5	ethanol	[C2H5OH]	0.5	/	[/]	0	/	[/]	0	/	[/]	0		0	0	0	0	0	0	0	0	0	0	0	0	0.051	0.2625	0.537	0.544	0.321	0.3325	0.472	0.377	0.2045
271	PANI/Gr	Training	Aniline	[Ani]	0.1	Ammonium persulfate	[APS]	0.025	graphene	[Gr]	33	hydrochloric acid	[HCl]	200	1	ethanol	[C2H5OH]	1.7	/	[/]	0	/	[/]	0	/	[/]	0		0	0	0	0	0	0	0	0	0	0	0	0	0.1734	0.8925	1.8258	1.8496	1.0914	1.1305	1.6048	1.2818	0.6953
272	PANI/Gr	Test	Aniline	[Ani]	0.1	Ammonium persulfate	[APS]	0.025	graphene	[Gr]	43	hydrochloric acid	[HCl]	200	1	ethanol	[C2H5OH]	1.7	/	[/]	0	/	[/]	0	/	[/]	0		0	0	0	0	0	0	0	0	0	0	0	0	0.1734	0.8925	1.8258	1.8496	1.0914	1.1305	1.6048	1.2818	0.6953
273	PANI/Gr	Training	Aniline	[Ani]	0.1	Ammonium persulfate	[APS]	0.125	graphene	[Gr]	0.5	hydrochloric acid	[HCl]	100	0.1	/	[/]	0	/	[/]	0	/	[/]	0	/	[/]	0		0	0	0	0	0	0	0	0	0	0	0	0	0	0	0	0	0	0	0	0	0
274	PANI/Gr	Training	Aniline	[Ani]	0.1	Ammonium persulfate	[APS]	0.125	graphene	[Gr]	1	hydrochloric acid	[HCl]	100	0.1	/	[/]	0	/	[/]	0	/	[/]	0	/	[/]	0		0	0	0	0	0	0	0	0	0	0	0	0	0	0	0	0	0	0	0	0	0
275	PANI/Gr	Training	Aniline	[Ani]	0.1	Ammonium persulfate	[APS]	0.125	graphene	[Gr]	3	hydrochloric acid	[HCl]	100	0.1	/	[/]	0	/	[/]	0	/	[/]	0	/	[/]	0		0	0	0	0	0	0	0	0	0	0	0	0	0	0	0	0	0	0	0	0	0
276	PANI/Gr	Test	Aniline	[Ani]	0.1	Ammonium persulfate	[APS]	0.125	graphene	[Gr]	5	hydrochloric acid	[HCl]	100	0.1	/	[/]	0	/	[/]	0	/	[/]	0	/	[/]	0		0	0	0	0	0	0	0	0	0	0	0	0	0	0	0	0	0	0	0	0	0
277	PANI	Training	Aniline	[Ani]	0.1	Ammonium persulfate	[APS]	0.125	/	[/]	0	hydrochloric acid	[HCl]	100	0.1	/	[/]	0	/	[/]	0	/	[/]	0	/	[/]	0		0	0	0	0	0	0	0	0	0	0	0	0	0	0	0	0	0	0	0	0	0
278	PANI	Test	Aniline	[Ani]	0.1	Ammonium persulfate	[APS]	0.125	/	[/]	0	hydrochloric acid	[HCl]	100	0.1	/	[/]	0	/	[/]	0	/	[/]	0	/	[/]	0		0	0	0	0	0	0	0	0	0	0	0	0	0	0	0	0	0	0	0	0	0
279	PANI/Gr	Training	Aniline	[Ani]	0.0215	Ammonium persulfate	[APS]	0.0215	graphene	[Gr]	10	hydrochloric acid	[HCl]	200	1	/	[/]	0	/	[/]	0	/	[/]	0	/	[/]	0		0	0	0	0	0	0	0	0	0	0	0	0	0	0	0	0	0	0	0	0	0
280	PANI/Gr	Test	Aniline	[Ani]	0.215	Ammonium persulfate	[APS]	0.0215	graphene	[Gr]	20	hydrochloric acid	[HCl]	200	1	/	[/]	0	/	[/]	0	/	[/]	0	/	[/]	0		0	0	0	0	0	0	0	0	0	0	0	0	0	0	0	0	0	0	0	0	0
281	PANI/Gr	Training	Aniline	[Ani]	0.215	Ammonium persulfate	[APS]	0.0215	graphene	[Gr]	30	hydrochloric acid	[HCl]	200	1	/	[/]	0	/	[/]	0	/	[/]	0	/	[/]	0		0	0	0	0	0	0	0	0	0	0	0	0	0	0	0	0	0	0	0	0	0
282	PANI/Gr	Training	Aniline	[Ani]	0.215	Ammonium persulfate	[APS]	0.0215	graphene	[Gr]	40	hydrochloric acid	[HCl]	200	1	/	[/]	0	/	[/]	0	/	[/]	0	/	[/]	0		0	0	0	0	0	0	0	0	0	0	0	0	0	0	0	0	0	0	0	0	0
283	PANI	Training	Aniline	[Ani]	2.15	Potassium persulfate	[KPS]	0.27	graphene	[Gr]	0	hydrochloric acid	[HCl]	2000	1	water	[H2O]	55.6	methanol	[C2H5OH]	3.44	/	[/]	0	/	[/]	0		0	0	0	0	0	0	0	0	0	0	0	0	6.85608	35.3884	111.559	177.437	139.207	96.6964	123.01	102.563	61.733
284	PANI	Test	Aniline	[Ani]	2.15	Potassium persulfate	[KPS]	0.27	graphene	[Gr]	0	hydrochloric acid	[HCl]	2000	1	water	[H2O]	55.6	methanol	[C2H5OH]	3.44	sulferic acid	[H2SO4]	18.66	/	[/]	0		0	0	0	0	0	0	3.47076	18.2308	43.1233	57.9206	47.5643	27.9713	29.2108	62.9679	138.821	194.679	146.746	102.593	130.791	115.755	83.8637
285	PANI /Gr	Training	Aniline	[Ani]	2.15	Potassium persulfate	[KPS]	0.27	graphene	[Gr]	3	hydrochloric acid	[HCl]	2000	1	water	[H2O]	55.6	methanol	[C2H5OH]	3.44	sulferic acid	[H2SO4]	18.66	/	[/]	0		0	0	0	0	0	0	3.47076	18.2308	43.1233	57.9206	47.5643	27.9713	29.2108	62.9679	138.821	194.679	146.746	102.593	130.791	115.755	83.8637
286	PANI /Gr	Test	Aniline	[Ani]	2.15	Potassium persulfate	[KPS]	0.27	graphene	[Gr]	3	hydrochloric acid	[HCl]	2000	1	water	[H2O]	55.6	methanol	[C2H5OH]	3.44	sulferic acid	[H2SO4]	18.66	/	[/]	0		0	0	0	0	0	0	3.47076	18.2308	43.1233	57.9206	47.5643	27.9713	29.2108	62.9679	138.821	194.679	146.746	102.593	130.791	115.755	83.8637
287	PANI /Gr	Training	Aniline	[Ani]	2.15	Potassium persulfate	[KPS]	0.27	graphene	[Gr]	3	hydrochloric acid	[HCl]	2000	1	water	[H2O]	55.6	methanol	[C2H5OH]	3.44	sulferic acid	[H2SO4]	18.66	/	[/]	0		0	0	0	0	0	0	3.47076	18.2308	43.1233	57.9206	47.5643	27.9713	29.2108	62.9679	138.821	194.679	146.746	102.593	130.791	115.755	83.8637
288	PANI /Gr	Training	Aniline	[Ani]	2.15	Potassium persulfate	[KPS]	0.27	graphene	[Gr]	3	hydrochloric acid	[HCl]	2000	1	water	[H2O]	55.6	methanol	[C2H5OH]	3.44	sulferic acid	[H2SO4]	18.66	/	[/]	0		0	0	0	0	0	0	3.47076	18.2308	43.1233	57.9206	47.5643	27.9713	29.2108	62.9679	138.821	194.679	146.746	102.593	130.791	115.755	83.8637
289	PANI /Gr	Training	Aniline	[Ani]	2.15	Potassium persulfate	[KPS]	0.27	graphene	[Gr]	3	hydrochloric acid	[HCl]	2000	1	water	[H2O]	55.6	methanol	[C2H5OH]	3.44	sulferic acid	[H2SO4]	18.66	/	[/]	0		0	0	0	0	0	0	3.47076	18.2308	43.1233	57.9206	47.5643	27.9713	29.2108	62.9679	138.821	194.679	146.746	102.593	130.791	115.755	83.8637
290	PANI /Gr	Training	Aniline	[Ani]	2.15	Potassium persulfate	[KPS]	0.27	graphene	[Gr]	3	hydrochloric acid	[HCl]	2000	1	water	[H2O]	55.6	methanol	[C2H5OH]	3.44	sulferic acid	[H2SO4]	18.66	/	[/]	0		0	0	0	0	0	0	3.47076	18.2308	43.1233	57.9206	47.5643	27.9713	29.2108	62.9679	138.821	194.679	146.746	102.593	130.791	115.755	83.8637
291	PANI /Gr	Training	Aniline	[Ani]	2.15	Potassium persulfate	[KPS]	0.27	graphene	[Gr]	3	hydrochloric acid	[HCl]	2000	1	water	[H2O]	55.6	methanol	[C2H5OH]	3.44	sulferic acid	[H2SO4]	18.66	/	[/]	0		0	0	0	0	0	0	3.47076	18.2308	43.1233	57.9206	47.5643	27.9713	29.2108	62.9679	138.821	194.679	146.746	102.593	130.791	115.755	83.8637
292	PANI /Gr	Test	Aniline	[Ani]	2.15	Potassium persulfate	[KPS]	0.27	graphene	[Gr]	3	hydrochloric acid	[HCl]	2000	1	water	[H2O]	55.6	methanol	[C2H5OH]	3.44	sulferic acid	[H2SO4]	18.66	/	[/]	0		0	0	0	0	0	0	3.47076	18.2308	43.1233	57.9206	47.5643	27.9713	29.2108	62.9679	138.821	194.679	146.746	102.593	130.791	115.755	83.8637
293	PANI /Gr	Training	Aniline	[Ani]	2.15	Potassium persulfate	[KPS]	0.27	graphene	[Gr]	3	hydrochloric acid	[HCl]	2000	1	water	[H2O]	55.6	methanol	[C2H5OH]	3.44	sulferic acid	[H2SO4]	18.66	/	[/]	0		0	0	0	0	0	0	3.47076	18.2308	43.1233	57.9206	47.5643	27.9713	29.2108	62.9679	138.821	194.679	146.746	102.593	130.791	115.755	83.8637
294	PANI /Gr	Training	Aniline	[Ani]	2.15	Potassium persulfate	[KPS]	0.27	graphene	[Gr]	3	hydrochloric acid	[HCl]	2000	1	water	[H2O]	55.6	methanol	[C2H5OH]	3.44	sulferic acid	[H2SO4]	18.66	/	[/]	0		0	0	0	0	0	0	3.47076	18.2308	43.1233	57.9206	47.5643	27.9713	29.2108	62.9679	138.821	194.679	146.746	102.593	130.791	115.755	83.8637
295	PANI /Gr	Training	Aniline	[Ani]	2.15	Potassium persulfate	[KPS]	0.27	graphene	[Gr]	3	hydrochloric acid	[HCl]	2000	1	water	[H2O]	55.6	methanol	[C2H5OH]	3.44	sulferic acid	[H2SO4]	18.66	/	[/]	0		0	0	0	0	0	0	3.47076	18.2308	43.1233	57.9206	47.5643	27.9713	29.2108	62.9679	138.821	194.679	146.746	102.593	130.791	115.755	83.8637
296	PANI /Gr	Training	Aniline	[Ani]	2.15	Potassium persulfate	[KPS]	0.27	graphene	[Gr]	3	hydrochloric acid	[HCl]	2000	1	water	[H2O]	55.6	methanol	[C2H5OH]	3.44	sulferic acid	[H2SO4]	18.66	/	[/]	0		0	0	0	0	0	0	3.47076	18.2308	43.1233	57.9206	47.5643	27.9713	29.2108	62.9679	138.821	194.679	146.746	102.593	130.791	115.755	83.8637
297	PANI /Gr	Test	Aniline	[Ani]	2.15	Potassium persulfate	[KPS]	0.27	graphene	[Gr]	3	hydrochloric acid	[HCl]	2000	1	water	[H2O]	55.6	methanol	[C2H5OH]	3.44	sulferic acid	[H2SO4]	18.66	/	[/]	0		0	0	0	0	0	0	3.47076	18.2308	43.1233	57.9206	47.5643	27.9713	29.2108	62.9679	138.821	194.679	146.746	102.593	130.791	115.755	83.8637
298	PANI /Gr	Training	Aniline	[Ani]	2.15	Potassium persulfate	[KPS]	0.27	graphene	[Gr]	3	hydrochloric acid	[HCl]	2000	1	water	[H2O]	55.6	methanol	[C2H5OH]	3.44	sulferic acid	[H2SO4]	18.66	/	[/]	0		0	0	0	0	0	0	3.47076	18.2308	43.1233	57.9206	47.5643	27.9713	29.2108	62.9679	138.821	194.679	146.746	102.593	130.791	115.755	83.8637
299	PANI /Gr	Training	Aniline	[Ani]	1	Potassium persulfate	[KPS]	0.5	graphene	[Gr]	3	p-toluenesulfonic acid	[C7H8O3S]	500	1	water	[H2O]	11.11	hydrochloric acid	[HCl]	6.6	ammonia solution	[NH4OH]	2.5	cetyltrimethylammonium bromide	[CTAB]	0.25		0	0	0	0	0	0	0	0	0	0	0	0.0132	3.69567	14.8086	33.9994	45.9479	34.7279	28.8972	40.7978	37.1192	27.0699
300	PANI /Gr	Training	Aniline	[Ani]	1	Potassium persulfate	[KPS]	0.5	graphene	[Gr]	3	p-toluenesulfonic acid	[C7H8O3S]	500	1	water	[H2O]	11.11	hydrochloric acid	[HCl]	6.6	ammonia solution	[NH4OH]	2.5	cetyltrimethylammonium bromide	[CTAB]	0.25		0	0	0	0	0	0	0	0	0	0	0	0.0132	3.69567	14.8086	33.9994	45.9479	34.7279	28.8972	40.7978	37.1192	27.0699
301	PANI /Gr	Test	Aniline	[Ani]	1	Potassium persulfate	[KPS]	0.5	graphene	[Gr]	3	p-toluenesulfonic acid	[C7H8O3S]	500	1	water	[H2O]	11.11	hydrochloric acid	[HCl]	6.6	ammonia solution	[NH4OH]	2.5	cetyltrimethylammonium bromide	[CTAB]	0.25		0	0	0	0	0	0	0	0	0	0	0	0.0132	3.69567	14.8086	33.9994	45.9479	34.7279	28.8972	40.7978	37.1192	27.0699
302	PANI /Gr	Training	Aniline	[Ani]	1	Potassium persulfate	[KPS]	0.5	graphene	[Gr]	3	p-toluenesulfonic acid	[C7H8O3S]	500	1	water	[H2O]	11.11	hydrochloric acid	[HCl]	6.6	ammonia solution	[NH4OH]	2.5	cetyltrimethylammonium bromide	[CTAB]	0.25		0	0	0	0	0	0	0	0	0	0	0	0.0132	3.69567	14.8086	33.9994	45.9479	34.7279	28.8972	40.7978	37.1192	27.0699
303	PANI /Gr	Training	Aniline	[Ani]	1	Potassium persulfate	[KPS]	0.5	graphene	[Gr]	3	p-toluenesulfonic acid	[C7H8O3S]	500	1	water	[H2O]	11.11	hydrochloric acid	[HCl]	6.6	ammonia solution	[NH4OH]	2.5	cetyltrimethylammonium bromide	[CTAB]	0.25		0	0	0	0	0	0	0	0	0	0	0	0.0132	3.69567	14.8086	33.9994	45.9479	34.7279	28.8972	40.7978	37.1192	27.0699
304	PANI /Gr	Test	Aniline	[Ani]	1	Potassium persulfate	[KPS]	0.5	graphene	[Gr]	3	p-toluenesulfonic acid	[C7H8O3S]	500	1	water	[H2O]	11.11	hydrochloric acid	[HCl]	6.6	ammonia solution	[NH4OH]	2.5	cetyltrimethylammonium bromide	[CTAB]	0.25		0	0	0	0	0	0	0	0	0	0	0	0.0132	3.69567	14.8086	33.9994	45.9479	34.7279	28.8972	40.7978	37.1192	27.0699
305	PANI /Gr	Training	Aniline	[Ani]	1	Potassium persulfate	[KPS]	0.5	graphene	[Gr]	3	p-toluenesulfonic acid	[C7H8O3S]	500	1	water	[H2O]	11.11	hydrochloric acid	[HCl]	6.6	ammonia solution	[NH4OH]	2.5	cetyltrimethylammonium bromide	[CTAB]	0.25		0	0	0	0	0	0	0	0	0	0	0	0.0132	3.69567	14.8086	33.9994	45.9479	34.7279	28.8972	40.7978	37.1192	27.0699
306	PANI /Gr	Training	Aniline	[Ani]	1	Potassium persulfate	[KPS]	0.5	graphene	[Gr]	3	p-toluenesulfonic acid	[C7H8O3S]	500	1	water	[H2O]	11.11	hydrochloric acid	[HCl]	6.6	ammonia solution	[NH4OH]	2.5	cetyltrimethylammonium bromide	[CTAB]	0.25		0	0	0	0	0	0	0	0	0	0	0	0.0132	3.69567	14.8086	33.9994	45.9479	34.7279	28.8972	40.7978	37.1192	27.0699
307	PANI /Gr	Training	Aniline	[Ani]	1	Potassium persulfate	[KPS]	0.5	graphene	[Gr]	3	p-toluenesulfonic acid	[C7H8O3S]	500	1	water	[H2O]	11.11	hydrochloric acid	[HCl]	6.6	ammonia solution	[NH4OH]	2.5	cetyltrimethylammonium bromide	[CTAB]	0.25		0	0	0	0	0	0	0	0	0	0	0	0.0132	3.69567	14.8086	33.9994	45.9479	34.7279	28.8972	40.7978	37.1192	27.0699
308	PANI /Gr	Training	Aniline	[Ani]	1	Potassium persulfate	[KPS]	0.5	graphene	[Gr]	3	p-toluenesulfonic acid	[C7H8O3S]	500	1	water	[H2O]	11.11	hydrochloric acid	[HCl]	6.6	ammonia solution	[NH4OH]	2.5	cetyltrimethylammonium bromide	[CTAB]	0.25		0	0	0	0	0	0	0	0	0	0	0	0.0132	3.69567	14.8086	33.9994	45.9479	34.7279	28.8972	40.7978	37.1192	27.0699
309	PANI /Gr	Training	Aniline	[Ani]	1	Potassium persulfate	[KPS]	0.5	graphene	[Gr]	3	p-toluenesulfonic acid	[C7H8O3S]	500	1	water	[H2O]	11.11	hydrochloric acid	[HCl]	6.6	ammonia solution	[NH4OH]	2.5	cetyltrimethylammonium bromide	[CTAB]	0.25		0	0	0	0	0	0	0	0	0	0	0	0.0132	3.69567	14.8086	33.9994	45.9479	34.7279	28.8972	40.7978	37.1192	27.0699
310	PANI /Gr	Training	Aniline	[Ani]	1	Potassium persulfate	[KPS]	0.5	graphene	[Gr]	3	p-toluenesulfonic acid	[C7H8O3S]	500	1	water	[H2O]	11.11	hydrochloric acid	[HCl]	6.6	ammonia solution	[NH4OH]	2.5	cetyltrimethylammonium bromide	[CTAB]	0.25		0	0	0	0	0	0	0	0	0	0	0	0.0132	3.69567	14.8086	33.9994	45.9479	34.7279	28.8972	40.7978	37.1192	27.0699
311	PANI /Gr	Training	Aniline	[Ani]	1	Potassium persulfate	[KPS]	0.5	graphene	[Gr]	3	p-toluenesulfonic acid	[C7H8O3S]	500	1	water	[H2O]	11.11	hydrochloric acid	[HCl]	6.6	ammonia solution	[NH4OH]	2.5	cetyltrimethylammonium bromide	[CTAB]	0.25		0	0	0	0	0	0	0	0	0	0	0	0.0132	3.69567	14.8086	33.9994	45.9479	34.7279	28.8972	40.7978	37.1192	27.0699
312	PANI /Gr	Training	Aniline	[Ani]	1	Potassium persulfate	[KPS]	0.5	graphene	[Gr]	3	p-toluenesulfonic acid	[C7H8O3S]	500	1	water	[H2O]	11.11	hydrochloric acid	[HCl]	6.6	ammonia solution	[NH4OH]	2.5	cetyltrimethylammonium bromide	[CTAB]	0.25		0	0	0	0	0	0	0	0	0	0	0	0.0132	3.69567	14.8086	33.9994	45.9479	34.7279	28.8972	40.7978	37.1192	27.0699
313	PANI /Gr	Training	Aniline	[Ani]	1	Potassium persulfate	[KPS]	0.5	graphene	[Gr]	3	p-toluenesulfonic acid	[C7H8O3S]	500	1	water	[H2O]	11.11	hydrochloric acid	[HCl]	6.6	ammonia solution	[NH4OH]	2.5	cetyltrimethylammonium bromide	[CTAB]	0.25		0	0	0	0	0	0	0	0	0	0	0	0.0132	3.69567	14.8086	33.9994	45.9479	34.7279	28.8972	40.7978	37.1192	27.0699
314	PANI /Gr	Test	Aniline	[Ani]	1	Potassium persulfate	[KPS]	0.5	graphene	[Gr]	3	p-toluenesulfonic acid	[C7H8O3S]	500	1	water	[H2O]	11.11	hydrochloric acid	[HCl]	6.6	ammonia solution	[NH4OH]	2.5	cetyltrimethylammonium bromide	[CTAB]	0.25		0	0	0	0	0	0	0	0	0	0	0	0.0132	3.69567	14.8086	33.9994	45.9479	34.7279	28.8972	40.7978	37.1192	27.0699
315	PANI /Gr	Training	Aniline	[Ani]	1	Potassium persulfate	[KPS]	0.5	graphene	[Gr]	3	p-toluenesulfonic acid	[C7H8O3S]	500	1	water	[H2O]	11.11	hydrochloric acid	[HCl]	6.6	ammonia solution	[NH4OH]	2.5	cetyltrimethylammonium bromide	[CTAB]	0.25		0	0	0	0	0	0	0	0	0	0	0	0.0132	3.69567	14.8086	33.9994	45.9479	34.7279	28.8972	40.7978	37.1192	27.0699
316	PANI /Gr	Test	Aniline	[Ani]	0.1	Ammonium persulfate	[APS]	0.1	graphene	[Gr]	10	camphorsulfonic acid	[C10H16O4S]	200	0.5	hydrochloric acid	[HCl]	6.6	water	[H2O]	5.6	methanol	[CH3OH]	2.5	cetyltrimethylammonium bromide	[CTAB]	0.1		0	0	0	0	0	0	0	0	0	0	0	0.0132	3.096	12.6706	25.9475	30.5421	21.5285	17.2444	20.2298	14.0193	7.6476
317	PANI /Gr	Test	Aniline	[Ani]	0.05	Ammonium persulfate	[APS]	0.02	graphene	[Gr]	1	/	[/]	0	0	sodium 4-dodecylbenzenesulfonic acid	[SDBS]	0.05	/	[/]	0	/	[/]	0	/	[/]	0		0	0	0	0	0	0	0.0176	0.1443	0.28855	0.2549	0.1427	0.0726	0.05265	0.05355	0.0387	0.0384	0.05655	0.0622	0.05205	0.05715	0.0721
318	PANI /Gr	Test	Aniline	[Ani]	0.05	Ammonium persulfate	[APS]	0.02	graphene	[Gr]	3	/	[/]	0	0	sodium 4-dodecylbenzenesulfonic acid	[SDBS]	0.05	/	[/]	0	/	[/]	0	/	[/]	0		0	0	0	0	0	0	0.0176	0.1443	0.28855	0.2549	0.1427	0.0726	0.05265	0.05355	0.0387	0.0384	0.05655	0.0622	0.05205	0.05715	0.0721
319	PANI /Gr	Training	Aniline	[Ani]	0.05	Ammonium persulfate	[APS]	0.02	graphene	[Gr]	5	/	[/]	0	0	sodium 4-dodecylbenzenesulfonic acid	[SDBS]	0.5	/	[/]	0	/	[/]	0	/	[/]	0		0	0	0	0	0	0	0.176	1.443	2.8855	2.549	1.427	0.726	0.5265	0.5355	0.387	0.384	0.5655	0.622	0.5205	0.5715	0.721
320	PANI /Gr	Training	Aniline	[Ani]	0.01	Potassium persulfate	[KPS]	0.005	graphene	[Gr]	0.1	hydrochloric acid	[HCl]	100	1	water	[H2O]	12.2	methanol	[CH3OH]	2.5	acetone	[C3H6O]	1.3	/	[/]	0		0	0	0	0	0	0	0	0	0	0	0	0	1.4724	8.5588	26.4705	40.9253	32.7758	23.4856	27.9863	22.7731	13.7495
321	PANI /Gr	Test	Aniline	[Ani]	0.01	Potassium persulfate	[KPS]	0.005	graphene	[Gr]	0.5	hydrochloric acid	[HCl]	100	1	water	[H2O]	12.2	methanol	[CH3OH]	2.5	acetone	[C3H6O]	1.3	/	[/]	0		0	0	0	0	0	0	0	0	0	0	0	0	1.4724	8.5588	26.4705	40.9253	32.7758	23.4856	27.9863	22.7731	13.7495
322	PANI /Gr	Training	Aniline	[Ani]	0.01	Potassium persulfate	[KPS]	0.005	graphene	[Gr]	1	hydrochloric acid	[HCl]	100	1	water	[H2O]	12.2	methanol	[CH3OH]	2.5	acetone	[C3H6O]	1.3	/	[/]	0		0	0	0	0	0	0	0	0	0	0	0	0	1.4724	8.5588	26.4705	40.9253	32.7758	23.4856	27.9863	22.7731	13.7495
323	PANI /Gr	Training	Aniline	[Ani]	0.5	Ammonium persulfate	[APS]	0.5	graphene	[Gr]	2	hydrochloric acid	[HCl]	80	1	dimethyl propylene urea	[C6H12N2O]	0.6	/	[/]	0	/	[/]	0	/	[/]	0		0	0	0	0	0	0	0	0	0	0	0	0	0	0	0	0	0	0	0	0	0
324	PANI /Gr	Training	Aniline	[Ani]	0.5	Ammonium persulfate	[APS]	0.5	graphene	[Gr]	2	hydrochloric acid	[HCl]	80	1	dimethyl propylene urea	[C6H12N2O]	0.6	/	[/]	0	/	[/]	0	/	[/]	0		0	0	0	0	0	0	0	0	0	0	0	0	0	0	0	0	0	0	0	0	0
325	PANI /Gr	Training	Aniline	[Ani]	0.5	Ammonium persulfate	[APS]	0.5	graphene	[Gr]	2	hydrochloric acid	[HCl]	80	1	dimethyl propylene urea	[C6H12N2O]	0.6	/	[/]	0	/	[/]	0	/	[/]	0		0	0	0	0	0	0	0	0	0	0	0	0	0	0	0	0	0	0	0	0	0
326	PANI /Gr	Training	Aniline	[Ani]	0.5	Ammonium persulfate	[APS]	0.5	graphene	[Gr]	2	hydrochloric acid	[HCl]	80	1	dimethyl propylene urea	[C6H12N2O]	0.6	/	[/]	0	/	[/]	0	/	[/]	0		0	0	0	0	0	0	0	0	0	0	0	0	0	0	0	0	0	0	0	0	0
327	PANI /Gr	Test	Aniline	[Ani]	0.5	Ammonium persulfate	[APS]	0.5	graphene	[Gr]	2	hydrochloric acid	[HCl]	80	1	dimethyl propylene urea	[C6H12N2O]	0.6	/	[/]	0	/	[/]	0	/	[/]	0		0	0	0	0	0	0	0	0	0	0	0	0	0	0	0	0	0	0	0	0	0
328	PANI /Gr	Test	Aniline	[Ani]	0.5	Ammonium persulfate	[APS]	0.5	graphene	[Gr]	2	hydrochloric acid	[HCl]	80	1	dimethyl propylene urea	[C6H12N2O]	0.6	/	[/]	0	/	[/]	0	/	[/]	0		0	0	0	0	0	0	0	0	0	0	0	0	0	0	0	0	0	0	0	0	0
329	PANI /Gr	Training	Aniline	[Ani]	0.5	Ammonium persulfate	[APS]	0.5	graphene	[Gr]	2	hydrochloric acid	[HCl]	80	1	dimethyl propylene urea	[C6H12N2O]	0.6	/	[/]	0	/	[/]	0	/	[/]	0		0	0	0	0	0	0	0	0	0	0	0	0	0	0	0	0	0	0	0	0	0
330	PANI /Gr	Training	Aniline	[Ani]	0.5	Ammonium persulfate	[APS]	0.5	graphene	[Gr]	2	hydrochloric acid	[HCl]	80	1	dimethyl propylene urea	[C6H12N2O]	0.6	/	[/]	0	/	[/]	0	/	[/]	0		0	0	0	0	0	0	0	0	0	0	0	0	0	0	0	0	0	0	0	0	0
331	PANI /Gr	Test	Aniline	[Ani]	0.5	Ammonium persulfate	[APS]	0.5	graphene	[Gr]	2	hydrochloric acid	[HCl]	80	1	dimethyl propylene urea	[C6H12N2O]	0.6	/	[/]	0	/	[/]	0	/	[/]	0		0	0	0	0	0	0	0	0	0	0	0	0	0	0	0	0	0	0	0	0	0
332	PANI /Gr	Training	Aniline	[Ani]	0.5	Ammonium persulfate	[APS]	0.5	graphene	[Gr]	2	hydrochloric acid	[HCl]	80	1	dimethyl propylene urea	[C6H12N2O]	0.6	/	[/]	0	/	[/]	0	/	[/]	0		0	0	0	0	0	0	0	0	0	0	0	0	0	0	0	0	0	0	0	0	0
333	PANI /Gr	Training	Aniline	[Ani]	0.5	Ammonium persulfate	[APS]	0.5	graphene	[Gr]	2	hydrochloric acid	[HCl]	80	1	dimethyl propylene urea	[C6H12N2O]	0.6	/	[/]	0	/	[/]	0	/	[/]	0		0	0	0	0	0	0	0	0	0	0	0	0	0	0	0	0	0	0	0	0	0
334	PANI /Gr	Test	Aniline	[Ani]	0.5	Ammonium persulfate	[APS]	0.5	graphene	[Gr]	2	hydrochloric acid	[HCl]	80	1	dimethyl propylene urea	[C6H12N2O]	0.6	/	[/]	0	/	[/]	0	/	[/]	0		0	0	0	0	0	0	0	0	0	0	0	0	0	0	0	0	0	0	0	0	0
335	PANI /Gr	Training	Aniline	[Ani]	0.5	Ammonium persulfate	[APS]	0.5	graphene	[Gr]	2	hydrochloric acid	[HCl]	80	1	dimethyl propylene urea	[C6H12N2O]	0.6	/	[/]	0	/	[/]	0	/	[/]	0		0	0	0	0	0	0	0	0	0	0	0	0	0	0	0	0	0	0	0	0	0
336	PANI /Gr	Training	Aniline	[Ani]	0.5	Ammonium persulfate	[APS]	0.5	graphene	[Gr]	2	hydrochloric acid	[HCl]	80	1	dimethyl propylene urea	[C6H12N2O]	0.6	/	[/]	0	/	[/]	0	/	[/]	0		0	0	0	0	0	0	0	0	0	0	0	0	0	0	0	0	0	0	0	0	0
337	PANI /Gr	Training	Aniline	[Ani]	0.5	Ammonium persulfate	[APS]	0.5	graphene	[Gr]	2	hydrochloric acid	[HCl]	80	1	dimethyl propylene urea	[C6H12N2O]	0.6	/	[/]	0	/	[/]	0	/	[/]	0		0	0	0	0	0	0	0	0	0	0	0	0	0	0	0	0	0	0	0	0	0
338	PANI /Gr	Training	Aniline	[Ani]	0.5	Ammonium persulfate	[APS]	0.5	graphene	[Gr]	2	hydrochloric acid	[HCl]	80	1	dimethyl propylene urea	[C6H12N2O]	0.6	/	[/]	0	/	[/]	0	/	[/]	0		0	0	0	0	0	0	0	0	0	0	0	0	0	0	0	0	0	0	0	0	0
339	PANI /Gr	Training	Aniline	[Ani]	0.5	Ammonium persulfate	[APS]	0.5	graphene	[Gr]	2	hydrochloric acid	[HCl]	80	1	dimethyl propylene urea	[C6H12N2O]	0.6	/	[/]	0	/	[/]	0	/	[/]	0		0	0	0	0	0	0	0	0	0	0	0	0	0	0	0	0	0	0	0	0	0
340	PANI /Gr	Training	Aniline	[Ani]	0.5	Ammonium persulfate	[APS]	0.5	graphene	[Gr]	2	hydrochloric acid	[HCl]	80	1	dimethyl propylene urea	[C6H12N2O]	0.6	/	[/]	0	/	[/]	0	/	[/]	0		0	0	0	0	0	0	0	0	0	0	0	0	0	0	0	0	0	0	0	0	0
341	PANI /Gr	Training	Aniline	[Ani]	0.5	Ammonium persulfate	[APS]	0.5	graphene	[Gr]	2	hydrochloric acid	[HCl]	80	1	dimethyl propylene urea	[C6H12N2O]	0.6	/	[/]	0	/	[/]	0	/	[/]	0		0	0	0	0	0	0	0	0	0	0	0	0	0	0	0	0	0	0	0	0	0
342	PANI /Gr	Training	Aniline	[Ani]	0.5	Ammonium persulfate	[APS]	0.5	graphene	[Gr]	2	hydrochloric acid	[HCl]	80	1	dimethyl propylene urea	[C6H12N2O]	0.6	/	[/]	0	/	[/]	0	/	[/]	0		0	0	0	0	0	0	0	0	0	0	0	0	0	0	0	0	0	0	0	0	0
343	PANI /Gr	Training	Aniline	[Ani]	0.5	Ammonium persulfate	[APS]	0.5	graphene	[Gr]	2	hydrochloric acid	[HCl]	80	1	dimethyl propylene urea	[C6H12N2O]	0.6	/	[/]	0	/	[/]	0	/	[/]	0		0	0	0	0	0	0	0	0	0	0	0	0	0	0	0	0	0	0	0	0	0
344	PANI /Gr	Training	Aniline	[Ani]	0.5	Ammonium persulfate	[APS]	0.5	graphene	[Gr]	2	hydrochloric acid	[HCl]	80	1	dimethyl propylene urea	[C6H12N2O]	0.6	/	[/]	0	/	[/]	0	/	[/]	0		0	0	0	0	0	0	0	0	0	0	0	0	0	0	0	0	0	0	0	0	0
345	PANI /Gr	Test	Aniline	[Ani]	0.5	Ammonium persulfate	[APS]	0.5	graphene	[Gr]	2	hydrochloric acid	[HCl]	80	1	dimethyl propylene urea	[C6H12N2O]	0.6	/	[/]	0	/	[/]	0	/	[/]	0		0	0	0	0	0	0	0	0	0	0	0	0	0	0	0	0	0	0	0	0	0
346	PANI /Gr	Training	Aniline	[Ani]	0.5	Ammonium persulfate	[APS]	0.5	graphene	[Gr]	2	hydrochloric acid	[HCl]	80	1	dimethyl propylene urea	[C6H12N2O]	0.6	/	[/]	0	/	[/]	0	/	[/]	0		0	0	0	0	0	0	0	0	0	0	0	0	0	0	0	0	0	0	0	0	0
347	PANI /Gr	Training	Aniline	[Ani]	0.5	Ammonium persulfate	[APS]	0.5	graphene	[Gr]	2	hydrochloric acid	[HCl]	80	1	dimethyl propylene urea	[C6H12N2O]	0.6	/	[/]	0	/	[/]	0	/	[/]	0		0	0	0	0	0	0	0	0	0	0	0	0	0	0	0	0	0	0	0	0	0
348	PANI /Gr	Training	Aniline	[Ani]	0.5	Ammonium persulfate	[APS]	0.5	graphene	[Gr]	2	hydrochloric acid	[HCl]	80	1	dimethyl propylene urea	[C6H12N2O]	0.6	/	[/]	0	/	[/]	0	/	[/]	0		0	0	0	0	0	0	0	0	0	0	0	0	0	0	0	0	0	0	0	0	0
349	PANI /Gr	Training	Aniline	[Ani]	0.5	Ammonium persulfate	[APS]	0.5	graphene	[Gr]	2	hydrochloric acid	[HCl]	80	1	dimethyl propylene urea	[C6H12N2O]	0.6	/	[/]	0	/	[/]	0	/	[/]	0		0	0	0	0	0	0	0	0	0	0	0	0	0	0	0	0	0	0	0	0	0
350	PANI /Gr	Training	Aniline	[Ani]	0.5	Ammonium persulfate	[APS]	0.5	graphene	[Gr]	2	hydrochloric acid	[HCl]	80	1	dimethyl propylene urea	[C6H12N2O]	0.6	/	[/]	0	/	[/]	0	/	[/]	0		0	0	0	0	0	0	0	0	0	0	0	0	0	0	0	0	0	0	0	0	0
351	PANI /Gr	Training	Aniline	[Ani]	0.5	Ammonium persulfate	[APS]	0.5	graphene	[Gr]	2	hydrochloric acid	[HCl]	80	1	dimethyl propylene urea	[C6H12N2O]	0.6	/	[/]	0	/	[/]	0	/	[/]	0		0	0	0	0	0	0	0	0	0	0	0	0	0	0	0	0	0	0	0	0	0
352	PANI /Gr	Training	Aniline	[Ani]	0.5	Ammonium persulfate	[APS]	0.5	graphene	[Gr]	2	hydrochloric acid	[HCl]	80	1	dimethyl propylene urea	[C6H12N2O]	0.6	/	[/]	0	/	[/]	0	/	[/]	0		0	0	0	0	0	0	0	0	0	0	0	0	0	0	0	0	0	0	0	0	0
353	PANI /Gr	Test	Aniline	[Ani]	0.5	Ammonium persulfate	[APS]	0.5	graphene	[Gr]	2	hydrochloric acid	[HCl]	80	1	dimethyl propylene urea	[C6H12N2O]	0.6	/	[/]	0	/	[/]	0	/	[/]	0		0	0	0	0	0	0	0	0	0	0	0	0	0	0	0	0	0	0	0	0	0
354	PANI /Gr	Training	Aniline	[Ani]	0.5	Ammonium persulfate	[APS]	0.5	graphene	[Gr]	2	hydrochloric acid	[HCl]	80	1	dimethyl propylene urea	[C6H12N2O]	0.6	/	[/]	0	/	[/]	0	/	[/]	0		0	0	0	0	0	0	0	0	0	0	0	0	0	0	0	0	0	0	0	0	0
355	PANI /Gr	Training	Aniline	[Ani]	0.5	Ammonium persulfate	[APS]	0.5	graphene	[Gr]	2	hydrochloric acid	[HCl]	80	1	dimethyl propylene urea	[C6H12N2O]	0.6	/	[/]	0	/	[/]	0	/	[/]	0		0	0	0	0	0	0	0	0	0	0	0	0	0	0	0	0	0	0	0	0	0
356	PANI /Gr	Training	Aniline	[Ani]	0.5	Ammonium persulfate	[APS]	0.5	graphene	[Gr]	2	hydrochloric acid	[HCl]	80	1	dimethyl propylene urea	[C6H12N2O]	0.6	/	[/]	0	/	[/]	0	/	[/]	0		0	0	0	0	0	0	0	0	0	0	0	0	0	0	0	0	0	0	0	0	0
357	PANI /Gr	Training	Aniline	[Ani]	0.5	Ammonium persulfate	[APS]	0.5	graphene	[Gr]	4	hydrochloric acid	[HCl]	80	1	dimethyl propylene urea	[C6H12N2O]	0.6	/	[/]	0	/	[/]	0	/	[/]	0		0	0	0	0	0	0	0	0	0	0	0	0	0	0	0	0	0	0	0	0	0
358	PANI /Gr	Training	Aniline	[Ani]	0.5	Ammonium persulfate	[APS]	0.5	graphene	[Gr]	4	hydrochloric acid	[HCl]	80	1	dimethyl propylene urea	[C6H12N2O]	0.6	/	[/]	0	/	[/]	0	/	[/]	0		0	0	0	0	0	0	0	0	0	0	0	0	0	0	0	0	0	0	0	0	0
359	PANI /Gr	Training	Aniline	[Ani]	0.5	Ammonium persulfate	[APS]	0.5	graphene	[Gr]	4	hydrochloric acid	[HCl]	80	1	dimethyl propylene urea	[C6H12N2O]	0.6	/	[/]	0	/	[/]	0	/	[/]	0		0	0	0	0	0	0	0	0	0	0	0	0	0	0	0	0	0	0	0	0	0
360	PANI /Gr	Training	Aniline	[Ani]	0.5	Ammonium persulfate	[APS]	0.5	graphene	[Gr]	4	hydrochloric acid	[HCl]	80	1	dimethyl propylene urea	[C6H12N2O]	0.6	/	[/]	0	/	[/]	0	/	[/]	0		0	0	0	0	0	0	0	0	0	0	0	0	0	0	0	0	0	0	0	0	0
361	PANI /Gr	Training	Aniline	[Ani]	0.5	Ammonium persulfate	[APS]	0.5	graphene	[Gr]	4	hydrochloric acid	[HCl]	80	1	dimethyl propylene urea	[C6H12N2O]	0.6	/	[/]	0	/	[/]	0	/	[/]	0		0	0	0	0	0	0	0	0	0	0	0	0	0	0	0	0	0	0	0	0	0
362	PANI /Gr	Training	Aniline	[Ani]	0.5	Ammonium persulfate	[APS]	0.5	graphene	[Gr]	4	hydrochloric acid	[HCl]	80	1	dimethyl propylene urea	[C6H12N2O]	0.6	/	[/]	0	/	[/]	0	/	[/]	0		0	0	0	0	0	0	0	0	0	0	0	0	0	0	0	0	0	0	0	0	0
363	PANI /Gr	Training	Aniline	[Ani]	0.5	Ammonium persulfate	[APS]	0.5	graphene	[Gr]	4	hydrochloric acid	[HCl]	80	1	dimethyl propylene urea	[C6H12N2O]	0.6	/	[/]	0	/	[/]	0	/	[/]	0		0	0	0	0	0	0	0	0	0	0	0	0	0	0	0	0	0	0	0	0	0
364	PANI /Gr	Training	Aniline	[Ani]	0.5	Ammonium persulfate	[APS]	0.5	graphene	[Gr]	4	hydrochloric acid	[HCl]	80	1	dimethyl propylene urea	[C6H12N2O]	0.6	/	[/]	0	/	[/]	0	/	[/]	0		0	0	0	0	0	0	0	0	0	0	0	0	0	0	0	0	0	0	0	0	0
365	PANI /Gr	Training	Aniline	[Ani]	0.5	Ammonium persulfate	[APS]	0.5	graphene	[Gr]	4	hydrochloric acid	[HCl]	80	1	dimethyl propylene urea	[C6H12N2O]	0.6	/	[/]	0	/	[/]	0	/	[/]	0		0	0	0	0	0	0	0	0	0	0	0	0	0	0	0	0	0	0	0	0	0
366	PANI /Gr	Test	Aniline	[Ani]	0.5	Ammonium persulfate	[APS]	0.5	graphene	[Gr]	4	hydrochloric acid	[HCl]	80	1	dimethyl propylene urea	[C6H12N2O]	0.6	/	[/]	0	/	[/]	0	/	[/]	0		0	0	0	0	0	0	0	0	0	0	0	0	0	0	0	0	0	0	0	0	0
367	PANI /Gr	Training	Aniline	[Ani]	0.5	Ammonium persulfate	[APS]	0.5	graphene	[Gr]	4	hydrochloric acid	[HCl]	80	1	dimethyl propylene urea	[C6H12N2O]	0.6	/	[/]	0	/	[/]	0	/	[/]	0		0	0	0	0	0	0	0	0	0	0	0	0	0	0	0	0	0	0	0	0	0
368	PANI /Gr	Training	Aniline	[Ani]	0.5	Ammonium persulfate	[APS]	0.5	graphene	[Gr]	4	hydrochloric acid	[HCl]	80	1	dimethyl propylene urea	[C6H12N2O]	0.6	/	[/]	0	/	[/]	0	/	[/]	0		0	0	0	0	0	0	0	0	0	0	0	0	0	0	0	0	0	0	0	0	0
369	PANI /Gr	Training	Aniline	[Ani]	0.5	Ammonium persulfate	[APS]	0.5	graphene	[Gr]	4	hydrochloric acid	[HCl]	80	1	dimethyl propylene urea	[C6H12N2O]	0.6	/	[/]	0	/	[/]	0	/	[/]	0		0	0	0	0	0	0	0	0	0	0	0	0	0	0	0	0	0	0	0	0	0
370	PANI /Gr	Training	Aniline	[Ani]	0.5	Ammonium persulfate	[APS]	0.5	graphene	[Gr]	4	hydrochloric acid	[HCl]	80	1	dimethyl propylene urea	[C6H12N2O]	0.6	/	[/]	0	/	[/]	0	/	[/]	0		0	0	0	0	0	0	0	0	0	0	0	0	0	0	0	0	0	0	0	0	0
371	PANI /Gr	Training	Aniline	[Ani]	0.5	Ammonium persulfate	[APS]	0.5	graphene	[Gr]	4	hydrochloric acid	[HCl]	80	1	dimethyl propylene urea	[C6H12N2O]	0.6	/	[/]	0	/	[/]	0	/	[/]	0		0	0	0	0	0	0	0	0	0	0	0	0	0	0	0	0	0	0	0	0	0
372	PANI /Gr	Training	Aniline	[Ani]	0.5	Ammonium persulfate	[APS]	0.5	graphene	[Gr]	4	hydrochloric acid	[HCl]	80	1	dimethyl propylene urea	[C6H12N2O]	0.6	/	[/]	0	/	[/]	0	/	[/]	0		0	0	0	0	0	0	0	0	0	0	0	0	0	0	0	0	0	0	0	0	0
373	PANI /Gr	Training	Aniline	[Ani]	0.5	Ammonium persulfate	[APS]	0.5	graphene	[Gr]	4	hydrochloric acid	[HCl]	80	1	dimethyl propylene urea	[C6H12N2O]	0.6	/	[/]	0	/	[/]	0	/	[/]	0		0	0	0	0	0	0	0	0	0	0	0	0	0	0	0	0	0	0	0	0	0
374	PANI /Gr	Training	Aniline	[Ani]	0.5	Ammonium persulfate	[APS]	0.5	graphene	[Gr]	4	hydrochloric acid	[HCl]	80	1	dimethyl propylene urea	[C6H12N2O]	0.6	/	[/]	0	/	[/]	0	/	[/]	0		0	0	0	0	0	0	0	0	0	0	0	0	0	0	0	0	0	0	0	0	0
375	PANI /Gr	Training	Aniline	[Ani]	0.5	Ammonium persulfate	[APS]	0.5	graphene	[Gr]	4	hydrochloric acid	[HCl]	80	1	dimethyl propylene urea	[C6H12N2O]	0.6	/	[/]	0	/	[/]	0	/	[/]	0		0	0	0	0	0	0	0	0	0	0	0	0	0	0	0	0	0	0	0	0	0
376	PANI /Gr	Training	Aniline	[Ani]	0.5	Ammonium persulfate	[APS]	0.5	graphene	[Gr]	4	hydrochloric acid	[HCl]	80	1	dimethyl propylene urea	[C6H12N2O]	0.6	/	[/]	0	/	[/]	0	/	[/]	0		0	0	0	0	0	0	0	0	0	0	0	0	0	0	0	0	0	0	0	0	0
377	PANI /Gr	Training	Aniline	[Ani]	0.5	Ammonium persulfate	[APS]	0.5	graphene	[Gr]	4	hydrochloric acid	[HCl]	80	1	dimethyl propylene urea	[C6H12N2O]	0.6	/	[/]	0	/	[/]	0	/	[/]	0		0	0	0	0	0	0	0	0	0	0	0	0	0	0	0	0	0	0	0	0	0
378	PANI /Gr	Training	Aniline	[Ani]	0.5	Ammonium persulfate	[APS]	0.5	graphene	[Gr]	4	hydrochloric acid	[HCl]	80	1	dimethyl propylene urea	[C6H12N2O]	0.6	/	[/]	0	/	[/]	0	/	[/]	0		0	0	0	0	0	0	0	0	0	0	0	0	0	0	0	0	0	0	0	0	0
379	PANI /Gr	Training	Aniline	[Ani]	0.5	Ammonium persulfate	[APS]	0.5	graphene	[Gr]	4	hydrochloric acid	[HCl]	80	1	dimethyl propylene urea	[C6H12N2O]	0.6	/	[/]	0	/	[/]	0	/	[/]	0		0	0	0	0	0	0	0	0	0	0	0	0	0	0	0	0	0	0	0	0	0
380	PANI /Gr	Training	Aniline	[Ani]	0.5	Ammonium persulfate	[APS]	0.5	graphene	[Gr]	4	hydrochloric acid	[HCl]	80	1	dimethyl propylene urea	[C6H12N2O]	0.6	/	[/]	0	/	[/]	0	/	[/]	0		0	0	0	0	0	0	0	0	0	0	0	0	0	0	0	0	0	0	0	0	0
381	PANI /Gr	Test	Aniline	[Ani]	0.5	Ammonium persulfate	[APS]	0.5	graphene	[Gr]	4	hydrochloric acid	[HCl]	80	1	dimethyl propylene urea	[C6H12N2O]	0.6	/	[/]	0	/	[/]	0	/	[/]	0		0	0	0	0	0	0	0	0	0	0	0	0	0	0	0	0	0	0	0	0	0
382	PANI /Gr	Training	Aniline	[Ani]	0.5	Ammonium persulfate	[APS]	0.5	graphene	[Gr]	4	hydrochloric acid	[HCl]	80	1	dimethyl propylene urea	[C6H12N2O]	0.6	/	[/]	0	/	[/]	0	/	[/]	0		0	0	0	0	0	0	0	0	0	0	0	0	0	0	0	0	0	0	0	0	0
383	PANI /Gr	Training	Aniline	[Ani]	0.5	Ammonium persulfate	[APS]	0.5	graphene	[Gr]	4	hydrochloric acid	[HCl]	80	1	dimethyl propylene urea	[C6H12N2O]	0.6	/	[/]	0	/	[/]	0	/	[/]	0		0	0	0	0	0	0	0	0	0	0	0	0	0	0	0	0	0	0	0	0	0
384	PANI /Gr	Training	Aniline	[Ani]	0.5	Ammonium persulfate	[APS]	0.5	graphene	[Gr]	4	hydrochloric acid	[HCl]	80	1	dimethyl propylene urea	[C6H12N2O]	0.6	/	[/]	0	/	[/]	0	/	[/]	0		0	0	0	0	0	0	0	0	0	0	0	0	0	0	0	0	0	0	0	0	0
385	PANI /Gr	Test	Aniline	[Ani]	0.5	Ammonium persulfate	[APS]	0.5	graphene	[Gr]	4	hydrochloric acid	[HCl]	80	1	dimethyl propylene urea	[C6H12N2O]	0.6	/	[/]	0	/	[/]	0	/	[/]	0		0	0	0	0	0	0	0	0	0	0	0	0	0	0	0	0	0	0	0	0	0
386	PANI /Gr	Training	Aniline	[Ani]	0.5	Ammonium persulfate	[APS]	0.5	graphene	[Gr]	4	hydrochloric acid	[HCl]	80	1	dimethyl propylene urea	[C6H12N2O]	0.6	/	[/]	0	/	[/]	0	/	[/]	0		0	0	0	0	0	0	0	0	0	0	0	0	0	0	0	0	0	0	0	0	0
387	PANI /Gr	Training	Aniline	[Ani]	0.5	Ammonium persulfate	[APS]	0.5	graphene	[Gr]	4	hydrochloric acid	[HCl]	80	1	dimethyl propylene urea	[C6H12N2O]	0.6	/	[/]	0	/	[/]	0	/	[/]	0		0	0	0	0	0	0	0	0	0	0	0	0	0	0	0	0	0	0	0	0	0
388	PANI /Gr	Training	Aniline	[Ani]	0.5	Ammonium persulfate	[APS]	0.5	graphene	[Gr]	4	hydrochloric acid	[HCl]	80	1	dimethyl propylene urea	[C6H12N2O]	0.6	/	[/]	0	/	[/]	0	/	[/]	0		0	0	0	0	0	0	0	0	0	0	0	0	0	0	0	0	0	0	0	0	0
389	PANI /Gr	Training	Aniline	[Ani]	0.5	Ammonium persulfate	[APS]	0.5	graphene	[Gr]	4	hydrochloric acid	[HCl]	80	1	dimethyl propylene urea	[C6H12N2O]	0.6	/	[/]	0	/	[/]	0	/	[/]	0		0	0	0	0	0	0	0	0	0	0	0	0	0	0	0	0	0	0	0	0	0
390	PANI /Gr	Training	Aniline	[Ani]	0.5	Ammonium persulfate	[APS]	0.5	graphene	[Gr]	4	hydrochloric acid	[HCl]	80	1	dimethyl propylene urea	[C6H12N2O]	0.6	/	[/]	0	/	[/]	0	/	[/]	0		0	0	0	0	0	0	0	0	0	0	0	0	0	0	0	0	0	0	0	0	0
391	PANI /Gr	Test	Aniline	[Ani]	0.5	Ammonium persulfate	[APS]	0.5	graphene	[Gr]	6	hydrochloric acid	[HCl]	80	1	dimethyl propylene urea	[C6H12N2O]	0.6	/	[/]	0	/	[/]	0	/	[/]	0		0	0	0	0	0	0	0	0	0	0	0	0	0	0	0	0	0	0	0	0	0
392	PANI /Gr	Test	Aniline	[Ani]	0.5	Ammonium persulfate	[APS]	0.5	graphene	[Gr]	6	hydrochloric acid	[HCl]	80	1	dimethyl propylene urea	[C6H12N2O]	0.6	/	[/]	0	/	[/]	0	/	[/]	0		0	0	0	0	0	0	0	0	0	0	0	0	0	0	0	0	0	0	0	0	0
393	PANI /Gr	Training	Aniline	[Ani]	0.5	Ammonium persulfate	[APS]	0.5	graphene	[Gr]	6	hydrochloric acid	[HCl]	80	1	dimethyl propylene urea	[C6H12N2O]	0.6	/	[/]	0	/	[/]	0	/	[/]	0		0	0	0	0	0	0	0	0	0	0	0	0	0	0	0	0	0	0	0	0	0
394	PANI /Gr	Training	Aniline	[Ani]	0.5	Ammonium persulfate	[APS]	0.5	graphene	[Gr]	6	hydrochloric acid	[HCl]	80	1	dimethyl propylene urea	[C6H12N2O]	0.6	/	[/]	0	/	[/]	0	/	[/]	0		0	0	0	0	0	0	0	0	0	0	0	0	0	0	0	0	0	0	0	0	0
395	PANI /Gr	Training	Aniline	[Ani]	0.5	Ammonium persulfate	[APS]	0.5	graphene	[Gr]	6	hydrochloric acid	[HCl]	80	1	dimethyl propylene urea	[C6H12N2O]	0.6	/	[/]	0	/	[/]	0	/	[/]	0		0	0	0	0	0	0	0	0	0	0	0	0	0	0	0	0	0	0	0	0	0
396	PANI /Gr	Training	Aniline	[Ani]	0.5	Ammonium persulfate	[APS]	0.5	graphene	[Gr]	6	hydrochloric acid	[HCl]	80	1	dimethyl propylene urea	[C6H12N2O]	0.6	/	[/]	0	/	[/]	0	/	[/]	0		0	0	0	0	0	0	0	0	0	0	0	0	0	0	0	0	0	0	0	0	0
397	PANI /Gr	Training	Aniline	[Ani]	0.5	Ammonium persulfate	[APS]	0.5	graphene	[Gr]	6	hydrochloric acid	[HCl]	80	1	dimethyl propylene urea	[C6H12N2O]	0.6	/	[/]	0	/	[/]	0	/	[/]	0		0	0	0	0	0	0	0	0	0	0	0	0	0	0	0	0	0	0	0	0	0
398	PANI /Gr	Training	Aniline	[Ani]	0.5	Ammonium persulfate	[APS]	0.5	graphene	[Gr]	6	hydrochloric acid	[HCl]	80	1	dimethyl propylene urea	[C6H12N2O]	0.6	/	[/]	0	/	[/]	0	/	[/]	0		0	0	0	0	0	0	0	0	0	0	0	0	0	0	0	0	0	0	0	0	0
399	PANI /Gr	Training	Aniline	[Ani]	0.5	Ammonium persulfate	[APS]	0.5	graphene	[Gr]	6	hydrochloric acid	[HCl]	80	1	dimethyl propylene urea	[C6H12N2O]	0.6	/	[/]	0	/	[/]	0	/	[/]	0		0	0	0	0	0	0	0	0	0	0	0	0	0	0	0	0	0	0	0	0	0
400	PANI /Gr	Training	Aniline	[Ani]	0.5	Ammonium persulfate	[APS]	0.5	graphene	[Gr]	6	hydrochloric acid	[HCl]	80	1	dimethyl propylene urea	[C6H12N2O]	0.6	/	[/]	0	/	[/]	0	/	[/]	0		0	0	0	0	0	0	0	0	0	0	0	0	0	0	0	0	0	0	0	0	0
401	PANI /Gr	Training	Aniline	[Ani]	0.5	Ammonium persulfate	[APS]	0.5	graphene	[Gr]	6	hydrochloric acid	[HCl]	80	1	dimethyl propylene urea	[C6H12N2O]	0.6	/	[/]	0	/	[/]	0	/	[/]	0		0	0	0	0	0	0	0	0	0	0	0	0	0	0	0	0	0	0	0	0	0
402	PANI /Gr	Test	Aniline	[Ani]	0.5	Ammonium persulfate	[APS]	0.5	graphene	[Gr]	6	hydrochloric acid	[HCl]	80	1	dimethyl propylene urea	[C6H12N2O]	0.6	/	[/]	0	/	[/]	0	/	[/]	0		0	0	0	0	0	0	0	0	0	0	0	0	0	0	0	0	0	0	0	0	0
403	PANI /Gr	Test	Aniline	[Ani]	0.5	Ammonium persulfate	[APS]	0.5	graphene	[Gr]	6	hydrochloric acid	[HCl]	80	1	dimethyl propylene urea	[C6H12N2O]	0.6	/	[/]	0	/	[/]	0	/	[/]	0		0	0	0	0	0	0	0	0	0	0	0	0	0	0	0	0	0	0	0	0	0
404	PANI /Gr	Training	Aniline	[Ani]	0.5	Ammonium persulfate	[APS]	0.5	graphene	[Gr]	6	hydrochloric acid	[HCl]	80	1	dimethyl propylene urea	[C6H12N2O]	0.6	/	[/]	0	/	[/]	0	/	[/]	0		0	0	0	0	0	0	0	0	0	0	0	0	0	0	0	0	0	0	0	0	0
405	PANI /Gr	Training	Aniline	[Ani]	0.5	Ammonium persulfate	[APS]	0.5	graphene	[Gr]	6	hydrochloric acid	[HCl]	80	1	dimethyl propylene urea	[C6H12N2O]	0.6	/	[/]	0	/	[/]	0	/	[/]	0		0	0	0	0	0	0	0	0	0	0	0	0	0	0	0	0	0	0	0	0	0
406	PANI /Gr	Training	Aniline	[Ani]	0.5	Ammonium persulfate	[APS]	0.5	graphene	[Gr]	6	hydrochloric acid	[HCl]	80	1	dimethyl propylene urea	[C6H12N2O]	0.6	/	[/]	0	/	[/]	0	/	[/]	0		0	0	0	0	0	0	0	0	0	0	0	0	0	0	0	0	0	0	0	0	0
407	PANI /Gr	Test	Aniline	[Ani]	0.5	Ammonium persulfate	[APS]	0.5	graphene	[Gr]	6	hydrochloric acid	[HCl]	80	1	dimethyl propylene urea	[C6H12N2O]	0.6	/	[/]	0	/	[/]	0	/	[/]	0		0	0	0	0	0	0	0	0	0	0	0	0	0	0	0	0	0	0	0	0	0
408	PANI /Gr	Training	Aniline	[Ani]	0.5	Ammonium persulfate	[APS]	0.5	graphene	[Gr]	6	hydrochloric acid	[HCl]	80	1	dimethyl propylene urea	[C6H12N2O]	0.6	/	[/]	0	/	[/]	0	/	[/]	0		0	0	0	0	0	0	0	0	0	0	0	0	0	0	0	0	0	0	0	0	0
409	PANI /Gr	Test	Aniline	[Ani]	0.5	Ammonium persulfate	[APS]	0.5	graphene	[Gr]	6	hydrochloric acid	[HCl]	80	1	dimethyl propylene urea	[C6H12N2O]	0.6	/	[/]	0	/	[/]	0	/	[/]	0		0	0	0	0	0	0	0	0	0	0	0	0	0	0	0	0	0	0	0	0	0
410	PANI /Gr	Test	Aniline	[Ani]	0.5	Ammonium persulfate	[APS]	0.5	graphene	[Gr]	6	hydrochloric acid	[HCl]	80	1	dimethyl propylene urea	[C6H12N2O]	0.6	/	[/]	0	/	[/]	0	/	[/]	0		0	0	0	0	0	0	0	0	0	0	0	0	0	0	0	0	0	0	0	0	0
411	PANI /Gr	Training	Aniline	[Ani]	0.5	Ammonium persulfate	[APS]	0.5	graphene	[Gr]	6	hydrochloric acid	[HCl]	80	1	dimethyl propylene urea	[C6H12N2O]	0.6	/	[/]	0	/	[/]	0	/	[/]	0		0	0	0	0	0	0	0	0	0	0	0	0	0	0	0	0	0	0	0	0	0
412	PANI /Gr	Training	Aniline	[Ani]	0.5	Ammonium persulfate	[APS]	0.5	graphene	[Gr]	6	hydrochloric acid	[HCl]	80	1	dimethyl propylene urea	[C6H12N2O]	0.6	/	[/]	0	/	[/]	0	/	[/]	0		0	0	0	0	0	0	0	0	0	0	0	0	0	0	0	0	0	0	0	0	0
413	PANI /Gr	Training	Aniline	[Ani]	0.5	Ammonium persulfate	[APS]	0.5	graphene	[Gr]	6	hydrochloric acid	[HCl]	80	1	dimethyl propylene urea	[C6H12N2O]	0.6	/	[/]	0	/	[/]	0	/	[/]	0		0	0	0	0	0	0	0	0	0	0	0	0	0	0	0	0	0	0	0	0	0
414	PANI /Gr	Training	Aniline	[Ani]	0.5	Ammonium persulfate	[APS]	0.5	graphene	[Gr]	6	hydrochloric acid	[HCl]	80	1	dimethyl propylene urea	[C6H12N2O]	0.6	/	[/]	0	/	[/]	0	/	[/]	0		0	0	0	0	0	0	0	0	0	0	0	0	0	0	0	0	0	0	0	0	0
415	PANI /Gr	Test	Aniline	[Ani]	0.5	Ammonium persulfate	[APS]	0.5	graphene	[Gr]	6	hydrochloric acid	[HCl]	80	1	dimethyl propylene urea	[C6H12N2O]	0.6	/	[/]	0	/	[/]	0	/	[/]	0		0	0	0	0	0	0	0	0	0	0	0	0	0	0	0	0	0	0	0	0	0
416	PANI /Gr	Training	Aniline	[Ani]	0.5	Ammonium persulfate	[APS]	0.5	graphene	[Gr]	6	hydrochloric acid	[HCl]	80	1	dimethyl propylene urea	[C6H12N2O]	0.6	/	[/]	0	/	[/]	0	/	[/]	0		0	0	0	0	0	0	0	0	0	0	0	0	0	0	0	0	0	0	0	0	0
417	PANI /Gr	Training	Aniline	[Ani]	0.5	Ammonium persulfate	[APS]	0.5	graphene	[Gr]	6	hydrochloric acid	[HCl]	80	1	dimethyl propylene urea	[C6H12N2O]	0.6	/	[/]	0	/	[/]	0	/	[/]	0		0	0	0	0	0	0	0	0	0	0	0	0	0	0	0	0	0	0	0	0	0
418	PANI /Gr	Training	Aniline	[Ani]	0.5	Ammonium persulfate	[APS]	0.5	graphene	[Gr]	6	hydrochloric acid	[HCl]	80	1	dimethyl propylene urea	[C6H12N2O]	0.6	/	[/]	0	/	[/]	0	/	[/]	0		0	0	0	0	0	0	0	0	0	0	0	0	0	0	0	0	0	0	0	0	0
419	PANI /Gr	Training	Aniline	[Ani]	0.5	Ammonium persulfate	[APS]	0.5	graphene	[Gr]	6	hydrochloric acid	[HCl]	80	1	dimethyl propylene urea	[C6H12N2O]	0.6	/	[/]	0	/	[/]	0	/	[/]	0		0	0	0	0	0	0	0	0	0	0	0	0	0	0	0	0	0	0	0	0	0
420	PANI /Gr	Training	Aniline	[Ani]	0.5	Ammonium persulfate	[APS]	0.5	graphene	[Gr]	6	hydrochloric acid	[HCl]	80	1	dimethyl propylene urea	[C6H12N2O]	0.6	/	[/]	0	/	[/]	0	/	[/]	0		0	0	0	0	0	0	0	0	0	0	0	0	0	0	0	0	0	0	0	0	0
421	PANI /Gr	Training	Aniline	[Ani]	0.5	Ammonium persulfate	[APS]	0.5	graphene	[Gr]	6	hydrochloric acid	[HCl]	80	1	dimethyl propylene urea	[C6H12N2O]	0.6	/	[/]	0	/	[/]	0	/	[/]	0		0	0	0	0	0	0	0	0	0	0	0	0	0	0	0	0	0	0	0	0	0
422	PANI /Gr	Test	Aniline	[Ani]	0.5	Ammonium persulfate	[APS]	0.5	graphene	[Gr]	6	hydrochloric acid	[HCl]	80	1	dimethyl propylene urea	[C6H12N2O]	0.6	/	[/]	0	/	[/]	0	/	[/]	0		0	0	0	0	0	0	0	0	0	0	0	0	0	0	0	0	0	0	0	0	0
423	PANI /Gr	Training	Aniline	[Ani]	0.5	Ammonium persulfate	[APS]	0.5	graphene	[Gr]	6	hydrochloric acid	[HCl]	80	1	dimethyl propylene urea	[C6H12N2O]	0.6	/	[/]	0	/	[/]	0	/	[/]	0		0	0	0	0	0	0	0	0	0	0	0	0	0	0	0	0	0	0	0	0	0
424	PANI /Gr	Training	Aniline	[Ani]	0.5	Ammonium persulfate	[APS]	0.5	graphene	[Gr]	6	hydrochloric acid	[HCl]	80	1	dimethyl propylene urea	[C6H12N2O]	0.6	/	[/]	0	/	[/]	0	/	[/]	0		0	0	0	0	0	0	0	0	0	0	0	0	0	0	0	0	0	0	0	0	0
425	PANI /Gr	Training	Aniline	[Ani]	0.5	Ammonium persulfate	[APS]	0.5	graphene	[Gr]	8	hydrochloric acid	[HCl]	80	1	dimethyl propylene urea	[C6H12N2O]	0.6	/	[/]	0	/	[/]	0	/	[/]	0		0	0	0	0	0	0	0	0	0	0	0	0	0	0	0	0	0	0	0	0	0
426	PANI /Gr	Test	Aniline	[Ani]	0.5	Ammonium persulfate	[APS]	0.5	graphene	[Gr]	8	hydrochloric acid	[HCl]	80	1	dimethyl propylene urea	[C6H12N2O]	0.6	/	[/]	0	/	[/]	0	/	[/]	0		0	0	0	0	0	0	0	0	0	0	0	0	0	0	0	0	0	0	0	0	0
427	PANI /Gr	Training	Aniline	[Ani]	0.5	Ammonium persulfate	[APS]	0.5	graphene	[Gr]	8	hydrochloric acid	[HCl]	80	1	dimethyl propylene urea	[C6H12N2O]	0.6	/	[/]	0	/	[/]	0	/	[/]	0		0	0	0	0	0	0	0	0	0	0	0	0	0	0	0	0	0	0	0	0	0
428	PANI /Gr	Training	Aniline	[Ani]	0.5	Ammonium persulfate	[APS]	0.5	graphene	[Gr]	8	hydrochloric acid	[HCl]	80	1	dimethyl propylene urea	[C6H12N2O]	0.6	/	[/]	0	/	[/]	0	/	[/]	0		0	0	0	0	0	0	0	0	0	0	0	0	0	0	0	0	0	0	0	0	0
429	PANI /Gr	Training	Aniline	[Ani]	0.5	Ammonium persulfate	[APS]	0.5	graphene	[Gr]	8	hydrochloric acid	[HCl]	80	1	dimethyl propylene urea	[C6H12N2O]	0.6	/	[/]	0	/	[/]	0	/	[/]	0		0	0	0	0	0	0	0	0	0	0	0	0	0	0	0	0	0	0	0	0	0
430	PANI /Gr	Test	Aniline	[Ani]	0.5	Ammonium persulfate	[APS]	0.5	graphene	[Gr]	8	hydrochloric acid	[HCl]	80	1	dimethyl propylene urea	[C6H12N2O]	0.6	/	[/]	0	/	[/]	0	/	[/]	0		0	0	0	0	0	0	0	0	0	0	0	0	0	0	0	0	0	0	0	0	0
431	PANI /Gr	Training	Aniline	[Ani]	0.5	Ammonium persulfate	[APS]	0.5	graphene	[Gr]	8	hydrochloric acid	[HCl]	80	1	dimethyl propylene urea	[C6H12N2O]	0.6	/	[/]	0	/	[/]	0	/	[/]	0		0	0	0	0	0	0	0	0	0	0	0	0	0	0	0	0	0	0	0	0	0
432	PANI /Gr	Training	Aniline	[Ani]	0.5	Ammonium persulfate	[APS]	0.5	graphene	[Gr]	8	hydrochloric acid	[HCl]	80	1	dimethyl propylene urea	[C6H12N2O]	0.6	/	[/]	0	/	[/]	0	/	[/]	0		0	0	0	0	0	0	0	0	0	0	0	0	0	0	0	0	0	0	0	0	0
433	PANI /Gr	Training	Aniline	[Ani]	0.5	Ammonium persulfate	[APS]	0.5	graphene	[Gr]	8	hydrochloric acid	[HCl]	80	1	dimethyl propylene urea	[C6H12N2O]	0.6	/	[/]	0	/	[/]	0	/	[/]	0		0	0	0	0	0	0	0	0	0	0	0	0	0	0	0	0	0	0	0	0	0
434	PANI /Gr	Training	Aniline	[Ani]	0.5	Ammonium persulfate	[APS]	0.5	graphene	[Gr]	8	hydrochloric acid	[HCl]	80	1	dimethyl propylene urea	[C6H12N2O]	0.6	/	[/]	0	/	[/]	0	/	[/]	0		0	0	0	0	0	0	0	0	0	0	0	0	0	0	0	0	0	0	0	0	0
435	PANI /Gr	Test	Aniline	[Ani]	0.5	Ammonium persulfate	[APS]	0.5	graphene	[Gr]	8	hydrochloric acid	[HCl]	80	1	dimethyl propylene urea	[C6H12N2O]	0.6	/	[/]	0	/	[/]	0	/	[/]	0		0	0	0	0	0	0	0	0	0	0	0	0	0	0	0	0	0	0	0	0	0
436	PANI /Gr	Training	Aniline	[Ani]	0.5	Ammonium persulfate	[APS]	0.5	graphene	[Gr]	8	hydrochloric acid	[HCl]	80	1	dimethyl propylene urea	[C6H12N2O]	0.6	/	[/]	0	/	[/]	0	/	[/]	0		0	0	0	0	0	0	0	0	0	0	0	0	0	0	0	0	0	0	0	0	0
437	PANI /Gr	Training	Aniline	[Ani]	0.5	Ammonium persulfate	[APS]	0.5	graphene	[Gr]	8	hydrochloric acid	[HCl]	80	1	dimethyl propylene urea	[C6H12N2O]	0.6	/	[/]	0	/	[/]	0	/	[/]	0		0	0	0	0	0	0	0	0	0	0	0	0	0	0	0	0	0	0	0	0	0
438	PANI /Gr	Training	Aniline	[Ani]	0.5	Ammonium persulfate	[APS]	0.5	graphene	[Gr]	8	hydrochloric acid	[HCl]	80	1	dimethyl propylene urea	[C6H12N2O]	0.6	/	[/]	0	/	[/]	0	/	[/]	0		0	0	0	0	0	0	0	0	0	0	0	0	0	0	0	0	0	0	0	0	0
439	PANI /Gr	Test	Aniline	[Ani]	0.5	Ammonium persulfate	[APS]	0.5	graphene	[Gr]	8	hydrochloric acid	[HCl]	80	1	dimethyl propylene urea	[C6H12N2O]	0.6	/	[/]	0	/	[/]	0	/	[/]	0		0	0	0	0	0	0	0	0	0	0	0	0	0	0	0	0	0	0	0	0	0
440	PANI /Gr	Training	Aniline	[Ani]	0.5	Ammonium persulfate	[APS]	0.5	graphene	[Gr]	8	hydrochloric acid	[HCl]	80	1	dimethyl propylene urea	[C6H12N2O]	0.6	/	[/]	0	/	[/]	0	/	[/]	0		0	0	0	0	0	0	0	0	0	0	0	0	0	0	0	0	0	0	0	0	0
441	PANI /Gr	Training	Aniline	[Ani]	0.5	Ammonium persulfate	[APS]	0.5	graphene	[Gr]	8	hydrochloric acid	[HCl]	80	1	dimethyl propylene urea	[C6H12N2O]	0.6	/	[/]	0	/	[/]	0	/	[/]	0		0	0	0	0	0	0	0	0	0	0	0	0	0	0	0	0	0	0	0	0	0
442	PANI /Gr	Test	Aniline	[Ani]	0.5	Ammonium persulfate	[APS]	0.5	graphene	[Gr]	8	hydrochloric acid	[HCl]	80	1	dimethyl propylene urea	[C6H12N2O]	0.6	/	[/]	0	/	[/]	0	/	[/]	0		0	0	0	0	0	0	0	0	0	0	0	0	0	0	0	0	0	0	0	0	0
443	PANI /Gr	Test	Aniline	[Ani]	0.5	Ammonium persulfate	[APS]	0.5	graphene	[Gr]	8	hydrochloric acid	[HCl]	80	1	dimethyl propylene urea	[C6H12N2O]	0.6	/	[/]	0	/	[/]	0	/	[/]	0		0	0	0	0	0	0	0	0	0	0	0	0	0	0	0	0	0	0	0	0	0
444	PANI /Gr	Training	Aniline	[Ani]	0.5	Ammonium persulfate	[APS]	0.5	graphene	[Gr]	8	hydrochloric acid	[HCl]	80	1	dimethyl propylene urea	[C6H12N2O]	0.6	/	[/]	0	/	[/]	0	/	[/]	0		0	0	0	0	0	0	0	0	0	0	0	0	0	0	0	0	0	0	0	0	0
445	PANI /Gr	Test	Aniline	[Ani]	0.5	Ammonium persulfate	[APS]	0.5	graphene	[Gr]	8	hydrochloric acid	[HCl]	80	1	dimethyl propylene urea	[C6H12N2O]	0.6	/	[/]	0	/	[/]	0	/	[/]	0		0	0	0	0	0	0	0	0	0	0	0	0	0	0	0	0	0	0	0	0	0
446	PANI /Gr	Test	Aniline	[Ani]	0.5	Ammonium persulfate	[APS]	0.5	graphene	[Gr]	8	hydrochloric acid	[HCl]	80	1	dimethyl propylene urea	[C6H12N2O]	0.6	/	[/]	0	/	[/]	0	/	[/]	0		0	0	0	0	0	0	0	0	0	0	0	0	0	0	0	0	0	0	0	0	0
447	PANI /Gr	Test	Aniline	[Ani]	0.5	Ammonium persulfate	[APS]	0.5	graphene	[Gr]	8	hydrochloric acid	[HCl]	80	1	dimethyl propylene urea	[C6H12N2O]	0.6	/	[/]	0	/	[/]	0	/	[/]	0		0	0	0	0	0	0	0	0	0	0	0	0	0	0	0	0	0	0	0	0	0
448	PANI /Gr	Training	Aniline	[Ani]	0.5	Ammonium persulfate	[APS]	0.5	graphene	[Gr]	8	hydrochloric acid	[HCl]	80	1	dimethyl propylene urea	[C6H12N2O]	0.6	/	[/]	0	/	[/]	0	/	[/]	0		0	0	0	0	0	0	0	0	0	0	0	0	0	0	0	0	0	0	0	0	0
449	PANI /Gr	Training	Aniline	[Ani]	0.5	Ammonium persulfate	[APS]	0.5	graphene	[Gr]	8	hydrochloric acid	[HCl]	80	1	dimethyl propylene urea	[C6H12N2O]	0.6	/	[/]	0	/	[/]	0	/	[/]	0		0	0	0	0	0	0	0	0	0	0	0	0	0	0	0	0	0	0	0	0	0
450	PANI /Gr	Training	Aniline	[Ani]	0.5	Ammonium persulfate	[APS]	0.5	graphene	[Gr]	8	hydrochloric acid	[HCl]	80	1	dimethyl propylene urea	[C6H12N2O]	0.6	/	[/]	0	/	[/]	0	/	[/]	0		0	0	0	0	0	0	0	0	0	0	0	0	0	0	0	0	0	0	0	0	0
451	PANI /Gr	Training	Aniline	[Ani]	0.5	Ammonium persulfate	[APS]	0.5	graphene	[Gr]	8	hydrochloric acid	[HCl]	80	1	dimethyl propylene urea	[C6H12N2O]	0.6	/	[/]	0	/	[/]	0	/	[/]	0		0	0	0	0	0	0	0	0	0	0	0	0	0	0	0	0	0	0	0	0	0
452	PANI /Gr	Test	Aniline	[Ani]	0.5	Ammonium persulfate	[APS]	0.5	graphene	[Gr]	8	hydrochloric acid	[HCl]	80	1	dimethyl propylene urea	[C6H12N2O]	0.6	/	[/]	0	/	[/]	0	/	[/]	0		0	0	0	0	0	0	0	0	0	0	0	0	0	0	0	0	0	0	0	0	0
453	PANI /Gr	Training	Aniline	[Ani]	0.5	Ammonium persulfate	[APS]	0.5	graphene	[Gr]	8	hydrochloric acid	[HCl]	80	1	dimethyl propylene urea	[C6H12N2O]	0.6	/	[/]	0	/	[/]	0	/	[/]	0		0	0	0	0	0	0	0	0	0	0	0	0	0	0	0	0	0	0	0	0	0
454	PANI /Gr	Training	Aniline	[Ani]	0.5	Ammonium persulfate	[APS]	0.5	graphene	[Gr]	8	hydrochloric acid	[HCl]	80	1	dimethyl propylene urea	[C6H12N2O]	0.6	/	[/]	0	/	[/]	0	/	[/]	0		0	0	0	0	0	0	0	0	0	0	0	0	0	0	0	0	0	0	0	0	0
455	PANI /Gr	Test	Aniline	[Ani]	0.5	Ammonium persulfate	[APS]	0.5	graphene	[Gr]	8	hydrochloric acid	[HCl]	80	1	dimethyl propylene urea	[C6H12N2O]	0.6	/	[/]	0	/	[/]	0	/	[/]	0		0	0	0	0	0	0	0	0	0	0	0	0	0	0	0	0	0	0	0	0	0
456	PANI /Gr	Training	Aniline	[Ani]	0.5	Ammonium persulfate	[APS]	0.5	graphene	[Gr]	8	hydrochloric acid	[HCl]	80	1	dimethyl propylene urea	[C6H12N2O]	0.6	/	[/]	0	/	[/]	0	/	[/]	0		0	0	0	0	0	0	0	0	0	0	0	0	0	0	0	0	0	0	0	0	0
457	PANI /Gr	Training	Aniline	[Ani]	0.5	Ammonium persulfate	[APS]	0.5	graphene	[Gr]	8	hydrochloric acid	[HCl]	80	1	dimethyl propylene urea	[C6H12N2O]	0.6	/	[/]	0	/	[/]	0	/	[/]	0		0	0	0	0	0	0	0	0	0	0	0	0	0	0	0	0	0	0	0	0	0
458	PANI /Gr	Training	Aniline	[Ani]	0.5	Ammonium persulfate	[APS]	0.5	graphene	[Gr]	8	hydrochloric acid	[HCl]	80	1	dimethyl propylene urea	[C6H12N2O]	0.6	/	[/]	0	/	[/]	0	/	[/]	0		0	0	0	0	0	0	0	0	0	0	0	0	0	0	0	0	0	0	0	0	0
459	PANI /Gr	Training	Aniline	[Ani]	0.5	Ammonium persulfate	[APS]	0.5	graphene	[Gr]	10	hydrochloric acid	[HCl]	80	1	dimethyl propylene urea	[C6H12N2O]	0.6	/	[/]	0	/	[/]	0	/	[/]	0		0	0	0	0	0	0	0	0	0	0	0	0	0	0	0	0	0	0	0	0	0
460	PANI /Gr	Training	Aniline	[Ani]	0.5	Ammonium persulfate	[APS]	0.5	graphene	[Gr]	10	hydrochloric acid	[HCl]	80	1	dimethyl propylene urea	[C6H12N2O]	0.6	/	[/]	0	/	[/]	0	/	[/]	0		0	0	0	0	0	0	0	0	0	0	0	0	0	0	0	0	0	0	0	0	0
461	PANI /Gr	Training	Aniline	[Ani]	0.5	Ammonium persulfate	[APS]	0.5	graphene	[Gr]	10	hydrochloric acid	[HCl]	80	1	dimethyl propylene urea	[C6H12N2O]	0.6	/	[/]	0	/	[/]	0	/	[/]	0		0	0	0	0	0	0	0	0	0	0	0	0	0	0	0	0	0	0	0	0	0
462	PANI /Gr	Test	Aniline	[Ani]	0.5	Ammonium persulfate	[APS]	0.5	graphene	[Gr]	10	hydrochloric acid	[HCl]	80	1	dimethyl propylene urea	[C6H12N2O]	0.6	/	[/]	0	/	[/]	0	/	[/]	0		0	0	0	0	0	0	0	0	0	0	0	0	0	0	0	0	0	0	0	0	0
463	PANI /Gr	Training	Aniline	[Ani]	0.5	Ammonium persulfate	[APS]	0.5	graphene	[Gr]	10	hydrochloric acid	[HCl]	80	1	dimethyl propylene urea	[C6H12N2O]	0.6	/	[/]	0	/	[/]	0	/	[/]	0		0	0	0	0	0	0	0	0	0	0	0	0	0	0	0	0	0	0	0	0	0
464	PANI /Gr	Training	Aniline	[Ani]	0.5	Ammonium persulfate	[APS]	0.5	graphene	[Gr]	10	hydrochloric acid	[HCl]	80	1	dimethyl propylene urea	[C6H12N2O]	0.6	/	[/]	0	/	[/]	0	/	[/]	0		0	0	0	0	0	0	0	0	0	0	0	0	0	0	0	0	0	0	0	0	0
465	PANI /Gr	Training	Aniline	[Ani]	0.5	Ammonium persulfate	[APS]	0.5	graphene	[Gr]	10	hydrochloric acid	[HCl]	80	1	dimethyl propylene urea	[C6H12N2O]	0.6	/	[/]	0	/	[/]	0	/	[/]	0		0	0	0	0	0	0	0	0	0	0	0	0	0	0	0	0	0	0	0	0	0
466	PANI /Gr	Test	Aniline	[Ani]	0.5	Ammonium persulfate	[APS]	0.5	graphene	[Gr]	10	hydrochloric acid	[HCl]	80	1	dimethyl propylene urea	[C6H12N2O]	0.6	/	[/]	0	/	[/]	0	/	[/]	0		0	0	0	0	0	0	0	0	0	0	0	0	0	0	0	0	0	0	0	0	0
467	PANI /Gr	Test	Aniline	[Ani]	0.5	Ammonium persulfate	[APS]	0.5	graphene	[Gr]	10	hydrochloric acid	[HCl]	80	1	dimethyl propylene urea	[C6H12N2O]	0.6	/	[/]	0	/	[/]	0	/	[/]	0		0	0	0	0	0	0	0	0	0	0	0	0	0	0	0	0	0	0	0	0	0
468	PANI /Gr	Training	Aniline	[Ani]	0.5	Ammonium persulfate	[APS]	0.5	graphene	[Gr]	10	hydrochloric acid	[HCl]	80	1	dimethyl propylene urea	[C6H12N2O]	0.6	/	[/]	0	/	[/]	0	/	[/]	0		0	0	0	0	0	0	0	0	0	0	0	0	0	0	0	0	0	0	0	0	0
469	PANI /Gr	Training	Aniline	[Ani]	0.5	Ammonium persulfate	[APS]	0.5	graphene	[Gr]	10	hydrochloric acid	[HCl]	80	1	dimethyl propylene urea	[C6H12N2O]	0.6	/	[/]	0	/	[/]	0	/	[/]	0		0	0	0	0	0	0	0	0	0	0	0	0	0	0	0	0	0	0	0	0	0
470	PANI /Gr	Training	Aniline	[Ani]	0.5	Ammonium persulfate	[APS]	0.5	graphene	[Gr]	10	hydrochloric acid	[HCl]	80	1	dimethyl propylene urea	[C6H12N2O]	0.6	/	[/]	0	/	[/]	0	/	[/]	0		0	0	0	0	0	0	0	0	0	0	0	0	0	0	0	0	0	0	0	0	0
471	PANI /Gr	Training	Aniline	[Ani]	0.5	Ammonium persulfate	[APS]	0.5	graphene	[Gr]	10	hydrochloric acid	[HCl]	80	1	dimethyl propylene urea	[C6H12N2O]	0.6	/	[/]	0	/	[/]	0	/	[/]	0		0	0	0	0	0	0	0	0	0	0	0	0	0	0	0	0	0	0	0	0	0
472	PANI /Gr	Test	Aniline	[Ani]	0.5	Ammonium persulfate	[APS]	0.5	graphene	[Gr]	10	hydrochloric acid	[HCl]	80	1	dimethyl propylene urea	[C6H12N2O]	0.6	/	[/]	0	/	[/]	0	/	[/]	0		0	0	0	0	0	0	0	0	0	0	0	0	0	0	0	0	0	0	0	0	0
473	PANI /Gr	Training	Aniline	[Ani]	0.5	Ammonium persulfate	[APS]	0.5	graphene	[Gr]	10	hydrochloric acid	[HCl]	80	1	dimethyl propylene urea	[C6H12N2O]	0.6	/	[/]	0	/	[/]	0	/	[/]	0		0	0	0	0	0	0	0	0	0	0	0	0	0	0	0	0	0	0	0	0	0
474	PANI /Gr	Training	Aniline	[Ani]	0.5	Ammonium persulfate	[APS]	0.5	graphene	[Gr]	10	hydrochloric acid	[HCl]	80	1	dimethyl propylene urea	[C6H12N2O]	0.6	/	[/]	0	/	[/]	0	/	[/]	0		0	0	0	0	0	0	0	0	0	0	0	0	0	0	0	0	0	0	0	0	0
475	PANI /Gr	Test	Aniline	[Ani]	0.5	Ammonium persulfate	[APS]	0.5	graphene	[Gr]	10	hydrochloric acid	[HCl]	80	1	dimethyl propylene urea	[C6H12N2O]	0.6	/	[/]	0	/	[/]	0	/	[/]	0		0	0	0	0	0	0	0	0	0	0	0	0	0	0	0	0	0	0	0	0	0
476	PANI /Gr	Training	Aniline	[Ani]	0.5	Ammonium persulfate	[APS]	0.5	graphene	[Gr]	10	hydrochloric acid	[HCl]	80	1	dimethyl propylene urea	[C6H12N2O]	0.6	/	[/]	0	/	[/]	0	/	[/]	0		0	0	0	0	0	0	0	0	0	0	0	0	0	0	0	0	0	0	0	0	0
477	PANI /Gr	Training	Aniline	[Ani]	0.5	Ammonium persulfate	[APS]	0.5	graphene	[Gr]	10	hydrochloric acid	[HCl]	80	1	dimethyl propylene urea	[C6H12N2O]	0.6	/	[/]	0	/	[/]	0	/	[/]	0		0	0	0	0	0	0	0	0	0	0	0	0	0	0	0	0	0	0	0	0	0
478	PANI /Gr	Training	Aniline	[Ani]	0.5	Ammonium persulfate	[APS]	0.5	graphene	[Gr]	10	hydrochloric acid	[HCl]	80	1	dimethyl propylene urea	[C6H12N2O]	0.6	/	[/]	0	/	[/]	0	/	[/]	0		0	0	0	0	0	0	0	0	0	0	0	0	0	0	0	0	0	0	0	0	0
479	PANI /Gr	Training	Aniline	[Ani]	0.5	Ammonium persulfate	[APS]	0.5	graphene	[Gr]	10	hydrochloric acid	[HCl]	80	1	dimethyl propylene urea	[C6H12N2O]	0.6	/	[/]	0	/	[/]	0	/	[/]	0		0	0	0	0	0	0	0	0	0	0	0	0	0	0	0	0	0	0	0	0	0
480	PANI /Gr	Training	Aniline	[Ani]	0.5	Ammonium persulfate	[APS]	0.5	graphene	[Gr]	10	hydrochloric acid	[HCl]	80	1	dimethyl propylene urea	[C6H12N2O]	0.6	/	[/]	0	/	[/]	0	/	[/]	0		0	0	0	0	0	0	0	0	0	0	0	0	0	0	0	0	0	0	0	0	0
481	PANI /Gr	Training	Aniline	[Ani]	0.5	Ammonium persulfate	[APS]	0.5	graphene	[Gr]	10	hydrochloric acid	[HCl]	80	1	dimethyl propylene urea	[C6H12N2O]	0.6	/	[/]	0	/	[/]	0	/	[/]	0		0	0	0	0	0	0	0	0	0	0	0	0	0	0	0	0	0	0	0	0	0
482	PANI /Gr	Training	Aniline	[Ani]	0.5	Ammonium persulfate	[APS]	0.5	graphene	[Gr]	10	hydrochloric acid	[HCl]	80	1	dimethyl propylene urea	[C6H12N2O]	0.6	/	[/]	0	/	[/]	0	/	[/]	0		0	0	0	0	0	0	0	0	0	0	0	0	0	0	0	0	0	0	0	0	0
483	PANI /Gr	Training	Aniline	[Ani]	0.5	Ammonium persulfate	[APS]	0.5	graphene	[Gr]	10	hydrochloric acid	[HCl]	80	1	dimethyl propylene urea	[C6H12N2O]	0.6	/	[/]	0	/	[/]	0	/	[/]	0		0	0	0	0	0	0	0	0	0	0	0	0	0	0	0	0	0	0	0	0	0
484	PANI /Gr	Training	Aniline	[Ani]	0.5	Ammonium persulfate	[APS]	0.5	graphene	[Gr]	10	hydrochloric acid	[HCl]	80	1	dimethyl propylene urea	[C6H12N2O]	0.6	/	[/]	0	/	[/]	0	/	[/]	0		0	0	0	0	0	0	0	0	0	0	0	0	0	0	0	0	0	0	0	0	0
485	PANI /Gr	Training	Aniline	[Ani]	0.5	Ammonium persulfate	[APS]	0.5	graphene	[Gr]	10	hydrochloric acid	[HCl]	80	1	dimethyl propylene urea	[C6H12N2O]	0.6	/	[/]	0	/	[/]	0	/	[/]	0		0	0	0	0	0	0	0	0	0	0	0	0	0	0	0	0	0	0	0	0	0
486	PANI /Gr	Test	Aniline	[Ani]	0.5	Ammonium persulfate	[APS]	0.5	graphene	[Gr]	10	hydrochloric acid	[HCl]	80	1	dimethyl propylene urea	[C6H12N2O]	0.6	/	[/]	0	/	[/]	0	/	[/]	0		0	0	0	0	0	0	0	0	0	0	0	0	0	0	0	0	0	0	0	0	0
487	PANI /Gr	Training	Aniline	[Ani]	0.5	Ammonium persulfate	[APS]	0.5	graphene	[Gr]	10	hydrochloric acid	[HCl]	80	1	dimethyl propylene urea	[C6H12N2O]	0.6	/	[/]	0	/	[/]	0	/	[/]	0		0	0	0	0	0	0	0	0	0	0	0	0	0	0	0	0	0	0	0	0	0
488	PANI /Gr	Test	Aniline	[Ani]	0.5	Ammonium persulfate	[APS]	0.5	graphene	[Gr]	10	hydrochloric acid	[HCl]	80	1	dimethyl propylene urea	[C6H12N2O]	0.6	/	[/]	0	/	[/]	0	/	[/]	0		0	0	0	0	0	0	0	0	0	0	0	0	0	0	0	0	0	0	0	0	0
489	PANI /Gr	Training	Aniline	[Ani]	0.5	Ammonium persulfate	[APS]	0.5	graphene	[Gr]	10	hydrochloric acid	[HCl]	80	1	dimethyl propylene urea	[C6H12N2O]	0.6	/	[/]	0	/	[/]	0	/	[/]	0		0	0	0	0	0	0	0	0	0	0	0	0	0	0	0	0	0	0	0	0	0
490	PANI /Gr	Test	Aniline	[Ani]	0.5	Ammonium persulfate	[APS]	0.5	graphene	[Gr]	10	hydrochloric acid	[HCl]	80	1	dimethyl propylene urea	[C6H12N2O]	0.6	/	[/]	0	/	[/]	0	/	[/]	0		0	0	0	0	0	0	0	0	0	0	0	0	0	0	0	0	0	0	0	0	0
491	PANI /Gr	Test	Aniline	[Ani]	0.5	Ammonium persulfate	[APS]	0.5	graphene	[Gr]	10	hydrochloric acid	[HCl]	80	1	dimethyl propylene urea	[C6H12N2O]	0.6	/	[/]	0	/	[/]	0	/	[/]	0		0	0	0	0	0	0	0	0	0	0	0	0	0	0	0	0	0	0	0	0	0
492	PANI /Gr	Test	Aniline	[Ani]	0.5	Ammonium persulfate	[APS]	0.5	graphene	[Gr]	10	hydrochloric acid	[HCl]	80	1	dimethyl propylene urea	[C6H12N2O]	0.6	/	[/]	0	/	[/]	0	/	[/]	0		0	0	0	0	0	0	0	0	0	0	0	0	0	0	0	0	0	0	0	0	0
493	PANI /Gr	Test	Aniline	[Ani]	0.004	Ammonium persulfate	[APS]	0.004	graphene	[Gr]	5	hydrochloric acid	[HCl]	100	1	chloroform	[CHCl3]	0.2	/	[/]	0	/	[/]	0	/	[/]	0		0	0	0	0	0	0	0	0	0	0	0	0	0	0	0	0	0.0452	0.2758	0.499	0.3892	0.2436
494	PANI /Gr	Training	Aniline	[Ani]	0.5	Ammonium persulfate	[APS]	0.5	graphene	[Gr]	2	/	[/]	0	0	hydrochloric acid	[HCl]	6.6	m-cresol	[C7H8O]	0.1	/	[/]	0	/	[/]	0		0	0	0	0	0	0	0	0	0	0.0035	0.0154	0.0723	2.5112	8.2021	12.3545	10.3059	5.0413	4.9329	6.3365	2.7717	0.397
495	PANI /Gr	Test	Aniline	[Ani]	0.5	Ammonium persulfate	[APS]	0.5	graphene	[Gr]	4	/	[/]	0	0	hydrochloric acid	[HCl]	6.6	m-cresol	[C7H8O]	0.1	/	[/]	0	/	[/]	0		0	0	0	0	0	0	0	0	0	0.0035	0.0154	0.0723	2.5112	8.2021	12.3545	10.3059	5.0413	4.9329	6.3365	2.7717	0.397
496	PANI /Gr	Training	Aniline	[Ani]	0.5	Ammonium persulfate	[APS]	0.5	graphene	[Gr]	6	/	[/]	0	0	hydrochloric acid	[HCl]	6.6	m-cresol	[C7H8O]	0.1	/	[/]	0	/	[/]	0		0	0	0	0	0	0	0	0	0	0.0035	0.0154	0.0723	2.5112	8.2021	12.3545	10.3059	5.0413	4.9329	6.3365	2.7717	0.397
497	PANI /Gr	Training	Aniline	[Ani]	0.5	Ammonium persulfate	[APS]	0.5	graphene	[Gr]	8	/	[/]	0	0	hydrochloric acid	[HCl]	6.6	m-cresol	[C7H8O]	0.1	/	[/]	0	/	[/]	0		0	0	0	0	0	0	0	0	0	0.0035	0.0154	0.0723	2.5112	8.2021	12.3545	10.3059	5.0413	4.9329	6.3365	2.7717	0.397
498	PANI /Gr	Test	Aniline	[Ani]	0.5	Ammonium persulfate	[APS]	0.5	graphene	[Gr]	10	/	[/]	0	0	hydrochloric acid	[HCl]	6.6	m-cresol	[C7H8O]	0.1	/	[/]	0	/	[/]	0		0	0	0	0	0	0	0	0	0	0.0035	0.0154	0.0723	2.5112	8.2021	12.3545	10.3059	5.0413	4.9329	6.3365	2.7717	0.397
499	PANI /Gr	Training	Aniline	[Ani]	0.5	Ammonium persulfate	[APS]	0.5	graphene	[Gr]	2	p-toluenesulfonic acid	[C7H8O3S]	15	1	hydrochloric acid	[HCl]	6.6	m-cresol	[C7H8O]	0.1	/	[/]	0	/	[/]	0		0	0	0	0	0	0	0	0	0	0.0035	0.0154	0.0723	2.5112	8.2021	12.3545	10.3059	5.0413	4.9329	6.3365	2.7717	0.397
500	PANI /Gr	Training	Aniline	[Ani]	0.5	Ammonium persulfate	[APS]	0.5	graphene	[Gr]	4	p-toluenesulfonic acid	[C7H8O3S]	15	1	hydrochloric acid	[HCl]	6.6	m-cresol	[C7H8O]	0.1	/	[/]	0	/	[/]	0		0	0	0	0	0	0	0	0	0	0.0035	0.0154	0.0723	2.5112	8.2021	12.3545	10.3059	5.0413	4.9329	6.3365	2.7717	0.397
501	PANI /Gr	Training	Aniline	[Ani]	0.5	Ammonium persulfate	[APS]	0.5	graphene	[Gr]	6	p-toluenesulfonic acid	[C7H8O3S]	15	1	hydrochloric acid	[HCl]	6.6	m-cresol	[C7H8O]	0.1	/	[/]	0	/	[/]	0		0	0	0	0	0	0	0	0	0	0.0035	0.0154	0.0723	2.5112	8.2021	12.3545	10.3059	5.0413	4.9329	6.3365	2.7717	0.397
502	PANI /Gr	Test	Aniline	[Ani]	0.5	Ammonium persulfate	[APS]	0.5	graphene	[Gr]	8	p-toluenesulfonic acid	[C7H8O3S]	15	1	hydrochloric acid	[HCl]	6.6	m-cresol	[C7H8O]	0.1	/	[/]	0	/	[/]	0		0	0	0	0	0	0	0	0	0	0.0035	0.0154	0.0723	2.5112	8.2021	12.3545	10.3059	5.0413	4.9329	6.3365	2.7717	0.397
503	PANI /Gr	Training	Aniline	[Ani]	0.5	Ammonium persulfate	[APS]	0.5	graphene	[Gr]	10	p-toluenesulfonic acid	[C7H8O3S]	15	1	hydrochloric acid	[HCl]	6.6	m-cresol	[C7H8O]	0.1	/	[/]	0	/	[/]	0		0	0	0	0	0	0	0	0	0	0.0035	0.0154	0.0723	2.5112	8.2021	12.3545	10.3059	5.0413	4.9329	6.3365	2.7717	0.397
504	PANI/GO	Training	Aniline	[Ani]	0.1	Ammonium persulfate	[APS]	0.1	graphene oxide	[GO]	10	hydrochloric acid	[HCl]	136	4.66	water	[H2O]	27.8	/	[/]	0	/	[/]	0	/	[/]	0		0	0	0	0	0	0	0	0	0	0	0	0	3.2526	16.7912	53.932	86.8472	68.4992	47.2044	59.8812	49.9844	30.163
505	PANI/GO	Training	Aniline	[Ani]	0.1	Ammonium persulfate	[APS]	0.1	graphene oxide	[GO]	30	hydrochloric acid	[HCl]	136	4.66	water	[H2O]	27.8	/	[/]	0	/	[/]	0	/	[/]	0		0	0	0	0	0	0	0	0	0	0	0	0	3.2526	16.7912	53.932	86.8472	68.4992	47.2044	59.8812	49.9844	30.163
506	PANI/GO	Training	Aniline	[Ani]	0.1	Ammonium persulfate	[APS]	0.1	graphene oxide	[GO]	40	hydrochloric acid	[HCl]	136	4.66	water	[H2O]	27.8	/	[/]	0	/	[/]	0	/	[/]	0		0	0	0	0	0	0	0	0	0	0	0	0	3.2526	16.7912	53.932	86.8472	68.4992	47.2044	59.8812	49.9844	30.163
507	PANI/GO	Training	Aniline	[Ani]	0.1	Ammonium persulfate	[APS]	0.1	graphene oxide	[GO]	10	hydrochloric acid	[HCl]	136	4.66	water	[H2O]	27.8	/	[/]	0	/	[/]	0	/	[/]	0		0	0	0	0	0	0	0	0	0	0	0	0	3.2526	16.7912	53.932	86.8472	68.4992	47.2044	59.8812	49.9844	30.163
508	PANI/GO	Training	Aniline	[Ani]	0.1	Ammonium persulfate	[APS]	0.1	graphene oxide	[GO]	30	hydrochloric acid	[HCl]	136	4.66	water	[H2O]	27.8	/	[/]	0	/	[/]	0	/	[/]	0		0	0	0	0	0	0	0	0	0	0	0	0	3.2526	16.7912	53.932	86.8472	68.4992	47.2044	59.8812	49.9844	30.163
509	PANI/GO	Training	Aniline	[Ani]	0.1	Ammonium persulfate	[APS]	0.1	graphene oxide	[GO]	40	hydrochloric acid	[HCl]	136	4.66	water	[H2O]	27.8	/	[/]	0	/	[/]	0	/	[/]	0		0	0	0	0	0	0	0	0	0	0	0	0	3.2526	16.7912	53.932	86.8472	68.4992	47.2044	59.8812	49.9844	30.163
510	PANI/GO	Training	Aniline	[Ani]	0.1	Ammonium persulfate	[APS]	0.1	graphene oxide	[GO]	10	hydrochloric acid	[HCl]	136	4.66	water	[H2O]	27.8	/	[/]	0	/	[/]	0	/	[/]	0		0	0	0	0	0	0	0	0	0	0	0	0	3.2526	16.7912	53.932	86.8472	68.4992	47.2044	59.8812	49.9844	30.163
511	PANI/GO	Training	Aniline	[Ani]	0.1	Ammonium persulfate	[APS]	0.1	graphene oxide	[GO]	30	hydrochloric acid	[HCl]	136	4.66	water	[H2O]	27.8	/	[/]	0	/	[/]	0	/	[/]	0		0	0	0	0	0	0	0	0	0	0	0	0	3.2526	16.7912	53.932	86.8472	68.4992	47.2044	59.8812	49.9844	30.163
512	PANI/GO	Training	Aniline	[Ani]	0.1	Ammonium persulfate	[APS]	0.1	graphene oxide	[GO]	40	hydrochloric acid	[HCl]	136	4.66	water	[H2O]	27.8	/	[/]	0	/	[/]	0	/	[/]	0		0	0	0	0	0	0	0	0	0	0	0	0	3.2526	16.7912	53.932	86.8472	68.4992	47.2044	59.8812	49.9844	30.163
513	PANI /GO	Test	Aniline	[Ani]	0.1	Ammonium persulfate	[APS]	0.1	graphene oxide	[GO]	10	hydrochloric acid	[HCl]	100	1	ethylene glycol	[C2H6O2]	0.2	/	[/]	0	/	[/]	0	/	[/]	0		0	0	0	0	0	0	0	0	0	0	0	0.0044	0.083	0.1886	0.2174	0.271	0.3152	0.2678	0.2564	0.2836	0.2626
514	PANI /GO	Training	Aniline	[Ani]	0.01	Ammonium persulfate	[APS]	0.0027	graphene oxide	[GO]	1	hydrochloric acid	[HCl]	100	1	water	[H2O]	5.6	Sodium hydroxide	[NaOH]	0.5	/	[/]	0	/	[/]	0		0	0	0	0	0	0	0	0.5835	2.2345	3.178	2.288	1.366	1.6732	3.9624	11.303	18.1999	14.4549	9.7308	12.0624	10.0988	6.2965
515	PANI /GO	Training	Aniline	[Ani]	0.01	Ammonium persulfate	[APS]	0.0027	graphene oxide	[GO]	1	hydrochloric acid	[HCl]	100	1	water	[H2O]	5.6	Sodium hydroxide	[NaOH]	0.5	/	[/]	0	/	[/]	0		0	0	0	0	0	0	0	0.5835	2.2345	3.178	2.288	1.366	1.6732	3.9624	11.303	18.1999	14.4549	9.7308	12.0624	10.0988	6.2965
516	PANI /GO	Test	Aniline	[Ani]	0.8	Ammonium persulfate	[APS]	0.2	graphene oxide	[GO]	5	hydrochloric acid	[HCl]	200	1	water	[H2O]	11.1	methanol	[CH3OH]	2.5	/	[/]	0	/	[/]	0		0	0	0	0	0	0	0	0	0	0	0	0	1.3437	7.8944	24.3365	37.4889	30.0654	21.6178	25.6169	20.7953	12.556
517	PANI /GO	Training	Aniline	[Ani]	0.8	Ammonium persulfate	[APS]	0.2	graphene oxide	[GO]	5	hydrochloric acid	[HCl]	200	1	water	[H2O]	11.1	methanol	[CH3OH]	2.5	/	[/]	0	/	[/]	0		0	0	0	0	0	0	0	0	0	0	0	0	1.3437	7.8944	24.3365	37.4889	30.0654	21.6178	25.6169	20.7953	12.556
518	PANI /GO	Training	Aniline	[Ani]	0.8	Ammonium persulfate	[APS]	0.2	graphene oxide	[GO]	5	hydrochloric acid	[HCl]	200	1	water	[H2O]	11.1	methanol	[CH3OH]	2.5	/	[/]	0	/	[/]	0		0	0	0	0	0	0	0	0	0	0	0	0	1.3437	7.8944	24.3365	37.4889	30.0654	21.6178	25.6169	20.7953	12.556
519	PANI /GO	Training	Aniline	[Ani]	0.8	Ammonium persulfate	[APS]	0.2	graphene oxide	[GO]	5	hydrochloric acid	[HCl]	200	1	water	[H2O]	11.1	methanol	[CH3OH]	2.5	/	[/]	0	/	[/]	0		0	0	0	0	0	0	0	0	0	0	0	0	1.3437	7.8944	24.3365	37.4889	30.0654	21.6178	25.6169	20.7953	12.556
520	PANI /GO	Training	Aniline	[Ani]	0.8	Ammonium persulfate	[APS]	0.2	graphene oxide	[GO]	5	hydrochloric acid	[HCl]	200	1	water	[H2O]	11.1	methanol	[CH3OH]	2.5	/	[/]	0	/	[/]	0		0	0	0	0	0	0	0	0	0	0	0	0	1.3437	7.8944	24.3365	37.4889	30.0654	21.6178	25.6169	20.7953	12.556
521	PANI /GO	Training	Aniline	[Ani]	0.8	Ammonium persulfate	[APS]	0.2	graphene oxide	[GO]	5	hydrochloric acid	[HCl]	200	1	water	[H2O]	11.1	methanol	[CH3OH]	2.5	/	[/]	0	/	[/]	0		0	0	0	0	0	0	0	0	0	0	0	0	1.3437	7.8944	24.3365	37.4889	30.0654	21.6178	25.6169	20.7953	12.556
522	PANI /GO	Training	Aniline	[Ani]	0.8	Ammonium persulfate	[APS]	0.2	graphene oxide	[GO]	5	hydrochloric acid	[HCl]	200	1	water	[H2O]	11.1	methanol	[CH3OH]	2.5	/	[/]	0	/	[/]	0		0	0	0	0	0	0	0	0	0	0	0	0	1.3437	7.8944	24.3365	37.4889	30.0654	21.6178	25.6169	20.7953	12.556
523	PANI /GO	Training	Aniline	[Ani]	0.8	Ammonium persulfate	[APS]	0.2	graphene oxide	[GO]	5	hydrochloric acid	[HCl]	200	1	water	[H2O]	11.1	methanol	[CH3OH]	2.5	/	[/]	0	/	[/]	0		0	0	0	0	0	0	0	0	0	0	0	0	1.3437	7.8944	24.3365	37.4889	30.0654	21.6178	25.6169	20.7953	12.556
524	PANI /GO	Training	Aniline	[Ani]	0.01	Ammonium persulfate	[APS]	0.0025	graphene oxide	[GO]	5	hydrochloric acid	[HCl]	100	1	water	[H2O]	5.6	ethanol	[C2H5OH]	0.9	/	[/]	0	/	[/]	0		0	0	0	0	0	0	0	0	0	0	0	0	0.747	3.8549	11.8306	18.4736	14.3762	10.1073	12.912	10.7474	6.4441
525	PANI /GO	Training	Aniline	[Ani]	0.01	Ammonium persulfate	[APS]	0.0025	graphene oxide	[GO]	10	hydrochloric acid	[HCl]	100	1	water	[H2O]	5.6	ethanol	[C2H5OH]	0.9	/	[/]	0	/	[/]	0		0	0	0	0	0	0	0	0	0	0	0	0	0.747	3.8549	11.8306	18.4736	14.3762	10.1073	12.912	10.7474	6.4441
526	PANI /GO	Training	Aniline	[Ani]	0.01	Ammonium persulfate	[APS]	0.0025	graphene oxide	[GO]	15	hydrochloric acid	[HCl]	100	1	water	[H2O]	5.6	ethanol	[C2H5OH]	0.9	/	[/]	0	/	[/]	0		0	0	0	0	0	0	0	0	0	0	0	0	0.747	3.8549	11.8306	18.4736	14.3762	10.1073	12.912	10.7474	6.4441
527	PANI /GO	Test	Aniline	[Ani]	0.01	Ammonium persulfate	[APS]	0.0025	graphene oxide	[GO]	20	hydrochloric acid	[HCl]	100	1	water	[H2O]	5.6	ethanol	[C2H5OH]	0.9	/	[/]	0	/	[/]	0		0	0	0	0	0	0	0	0	0	0	0	0	0.747	3.8549	11.8306	18.4736	14.3762	10.1073	12.912	10.7474	6.4441
528	PANI /GO	Training	Aniline	[Ani]	0.01	Ammonium persulfate	[APS]	0.0025	graphene oxide	[GO]	25	hydrochloric acid	[HCl]	100	1	water	[H2O]	5.6	ethanol	[C2H5OH]	0.9	/	[/]	0	/	[/]	0		0	0	0	0	0	0	0	0	0	0	0	0	0.747	3.8549	11.8306	18.4736	14.3762	10.1073	12.912	10.7474	6.4441
529	PANI /GO	Training	Aniline	[Ani]	0.01	Ammonium persulfate	[APS]	0.0025	graphene oxide	[GO]	30	hydrochloric acid	[HCl]	100	1	water	[H2O]	5.6	ethanol	[C2H5OH]	0.9	/	[/]	0	/	[/]	0		0	0	0	0	0	0	0	0	0	0	0	0	0.747	3.8549	11.8306	18.4736	14.3762	10.1073	12.912	10.7474	6.4441
530	PANI /GO	Test	Aniline	[Ani]	0.01	Ammonium persulfate	[APS]	0.0025	graphene oxide	[GO]	35	hydrochloric acid	[HCl]	100	1	water	[H2O]	5.6	ethanol	[C2H5OH]	0.9	/	[/]	0	/	[/]	0		0	0	0	0	0	0	0	0	0	0	0	0	0.747	3.8549	11.8306	18.4736	14.3762	10.1073	12.912	10.7474	6.4441
531	PANI /GO	Training	Aniline	[Ani]	0.01	Ammonium persulfate	[APS]	0.0025	graphene oxide	[GO]	5	hydrochloric acid	[HCl]	100	1	water	[H2O]	5.6	ethanol	[C2H5OH]	0.9	/	[/]	0	/	[/]	0		0	0	0	0	0	0	0	0	0	0	0	0	0.747	3.8549	11.8306	18.4736	14.3762	10.1073	12.912	10.7474	6.4441
532	PANI /GO	Training	Aniline	[Ani]	0.01	Ammonium persulfate	[APS]	0.0025	graphene oxide	[GO]	10	hydrochloric acid	[HCl]	100	1	water	[H2O]	5.6	ethanol	[C2H5OH]	0.9	/	[/]	0	/	[/]	0		0	0	0	0	0	0	0	0	0	0	0	0	0.747	3.8549	11.8306	18.4736	14.3762	10.1073	12.912	10.7474	6.4441
533	PANI /GO	Training	Aniline	[Ani]	0.01	Ammonium persulfate	[APS]	0.0025	graphene oxide	[GO]	15	hydrochloric acid	[HCl]	100	1	water	[H2O]	5.6	ethanol	[C2H5OH]	0.9	/	[/]	0	/	[/]	0		0	0	0	0	0	0	0	0	0	0	0	0	0.747	3.8549	11.8306	18.4736	14.3762	10.1073	12.912	10.7474	6.4441
534	PANI /GO	Test	Aniline	[Ani]	0.01	Ammonium persulfate	[APS]	0.0025	graphene oxide	[GO]	20	hydrochloric acid	[HCl]	100	1	water	[H2O]	5.6	ethanol	[C2H5OH]	0.9	/	[/]	0	/	[/]	0		0	0	0	0	0	0	0	0	0	0	0	0	0.747	3.8549	11.8306	18.4736	14.3762	10.1073	12.912	10.7474	6.4441
535	PANI /GO	Training	Aniline	[Ani]	0.01	Ammonium persulfate	[APS]	0.0025	graphene oxide	[GO]	25	hydrochloric acid	[HCl]	100	1	water	[H2O]	5.6	ethanol	[C2H5OH]	0.9	/	[/]	0	/	[/]	0		0	0	0	0	0	0	0	0	0	0	0	0	0.747	3.8549	11.8306	18.4736	14.3762	10.1073	12.912	10.7474	6.4441
536	PANI /GO	Training	Aniline	[Ani]	0.01	Ammonium persulfate	[APS]	0.0025	graphene oxide	[GO]	30	hydrochloric acid	[HCl]	100	1	water	[H2O]	5.6	ethanol	[C2H5OH]	0.9	/	[/]	0	/	[/]	0		0	0	0	0	0	0	0	0	0	0	0	0	0.747	3.8549	11.8306	18.4736	14.3762	10.1073	12.912	10.7474	6.4441
537	PANI /GO	Training	Aniline	[Ani]	0.01	Ammonium persulfate	[APS]	0.0025	graphene oxide	[GO]	35	hydrochloric acid	[HCl]	100	1	water	[H2O]	5.6	ethanol	[C2H5OH]	0.9	/	[/]	0	/	[/]	0		0	0	0	0	0	0	0	0	0	0	0	0	0.747	3.8549	11.8306	18.4736	14.3762	10.1073	12.912	10.7474	6.4441
538	PANI /rGO	Test	Aniline	[Ani]	0.01	Ammonium persulfate	[APS]	0.01	graphene oxide	[GO]	1	hydrochloric acid	[HCl]	300	1	water	[H2O]	5.6	methanol	[CH3OH]	1.2	/	[/]	0	/	[/]	0		0	0	0	0	0	0	0	0	0	0	0	0	0.6768	3.9536	12.2092	18.8444	15.1016	10.8384	12.882	10.4708	6.322
539	PANI /GO	Training	Aniline	[Ani]	0.01	Ammonium persulfate	[APS]	0.03	graphene oxide	[GO]	2	sulferic acid	[H2SO4]	20	1	water	[H2O]	5.6	ethanol	[C2H5OH]	1.7	/	[/]	0	/	[/]	0		0	0	0	0	0	0	0	0	0	0	0	0	0.8286	4.2749	12.6898	19.344	14.8898	10.6393	13.6672	11.3506	6.7713
540	PANI /GO	Training	Aniline	[Ani]	0.01	Ammonium persulfate	[APS]	0.03	graphene oxide	[GO]	2	sulferic acid	[H2SO4]	20	1	water	[H2O]	5.6	ethanol	[C2H5OH]	1.7	/	[/]	0	/	[/]	0		0	0	0	0	0	0	0	0	0	0	0	0	0.8286	4.2749	12.6898	19.344	14.8898	10.6393	13.6672	11.3506	6.7713
541	PANI /GO	Training	Aniline	[Ani]	0.01	Ammonium persulfate	[APS]	0.03	graphene oxide	[GO]	2	sulferic acid	[H2SO4]	20	1	water	[H2O]	5.6	ethanol	[C2H5OH]	1.7	/	[/]	0	/	[/]	0		0	0	0	0	0	0	0	0	0	0	0	0	0.8286	4.2749	12.6898	19.344	14.8898	10.6393	13.6672	11.3506	6.7713
542	PANI /GO	Training	Aniline	[Ani]	0.01	Ammonium persulfate	[APS]	0.03	graphene oxide	[GO]	2	sulferic acid	[H2SO4]	20	1	water	[H2O]	5.6	ethanol	[C2H5OH]	1.7	/	[/]	0	/	[/]	0		0	0	0	0	0	0	0	0	0	0	0	0	0.8286	4.2749	12.6898	19.344	14.8898	10.6393	13.6672	11.3506	6.7713
543	PANI /GO	Training	Aniline	[Ani]	0.01	Ammonium persulfate	[APS]	0.03	graphene oxide	[GO]	2	sulferic acid	[H2SO4]	20	1	water	[H2O]	5.6	ethanol	[C2H5OH]	1.7	/	[/]	0	/	[/]	0		0	0	0	0	0	0	0	0	0	0	0	0	0.8286	4.2749	12.6898	19.344	14.8898	10.6393	13.6672	11.3506	6.7713
544	PANI /GO	Training	Aniline	[Ani]	0.01	Ammonium persulfate	[APS]	0.03	graphene oxide	[GO]	2	sulferic acid	[H2SO4]	20	1	water	[H2O]	5.6	ethanol	[C2H5OH]	1.7	/	[/]	0	/	[/]	0		0	0	0	0	0	0	0	0	0	0	0	0	0.8286	4.2749	12.6898	19.344	14.8898	10.6393	13.6672	11.3506	6.7713
545	PANI /GO	Test	Aniline	[Ani]	0.01	Ammonium persulfate	[APS]	0.03	graphene oxide	[GO]	2	sulferic acid	[H2SO4]	20	1	water	[H2O]	5.6	ethanol	[C2H5OH]	1.7	/	[/]	0	/	[/]	0		0	0	0	0	0	0	0	0	0	0	0	0	0.8286	4.2749	12.6898	19.344	14.8898	10.6393	13.6672	11.3506	6.7713
546	PANI /GO	Training	Aniline	[Ani]	0.01	Ammonium persulfate	[APS]	0.03	graphene oxide	[GO]	2	sulferic acid	[H2SO4]	20	1	water	[H2O]	5.6	ethanol	[C2H5OH]	1.7	/	[/]	0	/	[/]	0		0	0	0	0	0	0	0	0	0	0	0	0	0.8286	4.2749	12.6898	19.344	14.8898	10.6393	13.6672	11.3506	6.7713
547	PANI /GO	Training	Aniline	[Ani]	0.01	Ammonium persulfate	[APS]	0.03	graphene oxide	[GO]	2	sulferic acid	[H2SO4]	20	1	water	[H2O]	5.6	ethanol	[C2H5OH]	1.7	/	[/]	0	/	[/]	0		0	0	0	0	0	0	0	0	0	0	0	0	0.8286	4.2749	12.6898	19.344	14.8898	10.6393	13.6672	11.3506	6.7713
548	PANI /GO	Training	Aniline	[Ani]	0.01	Ammonium persulfate	[APS]	0.03	graphene oxide	[GO]	2	sulferic acid	[H2SO4]	20	1	water	[H2O]	5.6	ethanol	[C2H5OH]	1.7	/	[/]	0	/	[/]	0		0	0	0	0	0	0	0	0	0	0	0	0	0.8286	4.2749	12.6898	19.344	14.8898	10.6393	13.6672	11.3506	6.7713
549	PANI /GO	Training	Aniline	[Ani]	0.01	Ammonium persulfate	[APS]	0.03	graphene oxide	[GO]	2	sulferic acid	[H2SO4]	20	1	water	[H2O]	5.6	ethanol	[C2H5OH]	1.7	/	[/]	0	/	[/]	0		0	0	0	0	0	0	0	0	0	0	0	0	0.8286	4.2749	12.6898	19.344	14.8898	10.6393	13.6672	11.3506	6.7713
550	PANI /GO	Test	Aniline	[Ani]	0.01	Ammonium persulfate	[APS]	0.03	graphene oxide	[GO]	2	sulferic acid	[H2SO4]	20	1	water	[H2O]	5.6	ethanol	[C2H5OH]	1.7	/	[/]	0	/	[/]	0		0	0	0	0	0	0	0	0	0	0	0	0	0.8286	4.2749	12.6898	19.344	14.8898	10.6393	13.6672	11.3506	6.7713
551	PANI /GO	Training	Aniline	[Ani]	0.01	Ammonium persulfate	[APS]	0.03	graphene oxide	[GO]	2	sulferic acid	[H2SO4]	20	1	water	[H2O]	5.6	ethanol	[C2H5OH]	1.7	/	[/]	0	/	[/]	0		0	0	0	0	0	0	0	0	0	0	0	0	0.8286	4.2749	12.6898	19.344	14.8898	10.6393	13.6672	11.3506	6.7713
552	PANI /GO	Training	Aniline	[Ani]	0.01	Ammonium persulfate	[APS]	0.03	graphene oxide	[GO]	2	sulferic acid	[H2SO4]	20	1	water	[H2O]	5.6	ethanol	[C2H5OH]	1.7	/	[/]	0	/	[/]	0		0	0	0	0	0	0	0	0	0	0	0	0	0.8286	4.2749	12.6898	19.344	14.8898	10.6393	13.6672	11.3506	6.7713
553	PANI /GO	Training	Aniline	[Ani]	0.01	Ammonium persulfate	[APS]	0.03	graphene oxide	[GO]	2	sulferic acid	[H2SO4]	20	1	water	[H2O]	5.6	ethanol	[C2H5OH]	1.7	/	[/]	0	/	[/]	0		0	0	0	0	0	0	0	0	0	0	0	0	0.8286	4.2749	12.6898	19.344	14.8898	10.6393	13.6672	11.3506	6.7713
554	PANI /GO	Training	Aniline	[Ani]	0.01	Ammonium persulfate	[APS]	0.03	graphene oxide	[GO]	2	sulferic acid	[H2SO4]	20	1	water	[H2O]	5.6	ethanol	[C2H5OH]	1.7	/	[/]	0	/	[/]	0		0	0	0	0	0	0	0	0	0	0	0	0	0.8286	4.2749	12.6898	19.344	14.8898	10.6393	13.6672	11.3506	6.7713
555	PANI /GO	Training	Aniline	[Ani]	0.01	Ammonium persulfate	[APS]	0.03	graphene oxide	[GO]	2	sulferic acid	[H2SO4]	20	1	water	[H2O]	5.6	ethanol	[C2H5OH]	1.7	/	[/]	0	/	[/]	0		0	0	0	0	0	0	0	0	0	0	0	0	0.8286	4.2749	12.6898	19.344	14.8898	10.6393	13.6672	11.3506	6.7713
556	PANI /GO	Training	Aniline	[Ani]	0.01	Ammonium persulfate	[APS]	0.03	graphene oxide	[GO]	2	sulferic acid	[H2SO4]	20	1	water	[H2O]	5.6	ethanol	[C2H5OH]	1.7	/	[/]	0	/	[/]	0		0	0	0	0	0	0	0	0	0	0	0	0	0.8286	4.2749	12.6898	19.344	14.8898	10.6393	13.6672	11.3506	6.7713
557	PANI /GO	Test	Aniline	[Ani]	0.01	Ammonium persulfate	[APS]	0.03	graphene oxide	[GO]	2	sulferic acid	[H2SO4]	20	1	water	[H2O]	5.6	ethanol	[C2H5OH]	1.7	/	[/]	0	/	[/]	0		0	0	0	0	0	0	0	0	0	0	0	0	0.8286	4.2749	12.6898	19.344	14.8898	10.6393	13.6672	11.3506	6.7713
558	PANI /GO	Training	Aniline	[Ani]	0.01	Ammonium persulfate	[APS]	0.03	graphene oxide	[GO]	2	sulferic acid	[H2SO4]	20	1	water	[H2O]	5.6	ethanol	[C2H5OH]	1.7	/	[/]	0	/	[/]	0		0	0	0	0	0	0	0	0	0	0	0	0	0.8286	4.2749	12.6898	19.344	14.8898	10.6393	13.6672	11.3506	6.7713
559	PANI /GO	Test	Aniline	[Ani]	0.01	Ammonium persulfate	[APS]	0.03	graphene oxide	[GO]	2	sulferic acid	[H2SO4]	20	1	water	[H2O]	5.6	ethanol	[C2H5OH]	1.7	/	[/]	0	/	[/]	0		0	0	0	0	0	0	0	0	0	0	0	0	0.8286	4.2749	12.6898	19.344	14.8898	10.6393	13.6672	11.3506	6.7713
560	PANI /GO	Test	Aniline	[Ani]	0.01	Ammonium persulfate	[APS]	0.03	graphene oxide	[GO]	2	sulferic acid	[H2SO4]	20	1	water	[H2O]	5.6	ethanol	[C2H5OH]	1.7	/	[/]	0	/	[/]	0		0	0	0	0	0	0	0	0	0	0	0	0	0.8286	4.2749	12.6898	19.344	14.8898	10.6393	13.6672	11.3506	6.7713
561	PANI /GO	Training	Aniline	[Ani]	0.01	Ammonium persulfate	[APS]	0.03	graphene oxide	[GO]	2	sulferic acid	[H2SO4]	20	1	water	[H2O]	5.6	ethanol	[C2H5OH]	1.7	/	[/]	0	/	[/]	0		0	0	0	0	0	0	0	0	0	0	0	0	0.8286	4.2749	12.6898	19.344	14.8898	10.6393	13.6672	11.3506	6.7713
562	PANI /GO	Training	Aniline	[Ani]	0.01	Ammonium persulfate	[APS]	0.03	graphene oxide	[GO]	2	sulferic acid	[H2SO4]	20	1	water	[H2O]	5.6	ethanol	[C2H5OH]	1.7	/	[/]	0	/	[/]	0		0	0	0	0	0	0	0	0	0	0	0	0	0.8286	4.2749	12.6898	19.344	14.8898	10.6393	13.6672	11.3506	6.7713
563	PANI /GO	Training	Aniline	[Ani]	0.01	Ammonium persulfate	[APS]	0.03	graphene oxide	[GO]	2	sulferic acid	[H2SO4]	20	1	water	[H2O]	5.6	ethanol	[C2H5OH]	1.7	/	[/]	0	/	[/]	0		0	0	0	0	0	0	0	0	0	0	0	0	0.8286	4.2749	12.6898	19.344	14.8898	10.6393	13.6672	11.3506	6.7713
564	PANI /GO	Training	Aniline	[Ani]	0.01	Ammonium persulfate	[APS]	0.03	graphene oxide	[GO]	2	sulferic acid	[H2SO4]	20	1	water	[H2O]	5.6	ethanol	[C2H5OH]	1.7	/	[/]	0	/	[/]	0		0	0	0	0	0	0	0	0	0	0	0	0	0.8286	4.2749	12.6898	19.344	14.8898	10.6393	13.6672	11.3506	6.7713
565	PANI/GO	Training	Aniline	[Ani]	0.0001	Ammonium persulfate	[APS]	0.1	reduced graphene oxide	[rGO]	10	hydrochloric acid	[HCl]	136	4.66	water	[H2O]	27.8	/	[/]	0	/	[/]	0	/	[/]	0		0	0	0	0	0	0	0	0	0	0	0	0	3.2526	16.7912	53.932	86.8472	68.4992	47.2044	59.8812	49.9844	30.163
566	PANI/GO	Training	Aniline	[Ani]	0.0001	Ammonium persulfate	[APS]	0.1	reduced graphene oxide	[rGO]	10	hydrochloric acid	[HCl]	136	4.66	water	[H2O]	27.8	/	[/]	0	/	[/]	0	/	[/]	0		0	0	0	0	0	0	0	0	0	0	0	0	3.2526	16.7912	53.932	86.8472	68.4992	47.2044	59.8812	49.9844	30.163
567	PANI/GO	Test	Aniline	[Ani]	0.0001	Ammonium persulfate	[APS]	0.1	reduced graphene oxide	[rGO]	10	hydrochloric acid	[HCl]	136	4.66	water	[H2O]	27.8	/	[/]	0	/	[/]	0	/	[/]	0		0	0	0	0	0	0	0	0	0	0	0	0	3.2526	16.7912	53.932	86.8472	68.4992	47.2044	59.8812	49.9844	30.163
568	PANI/GO	Training	Aniline	[Ani]	0.0001	Ammonium persulfate	[APS]	0.1	reduced graphene oxide	[rGO]	10	hydrochloric acid	[HCl]	136	4.66	water	[H2O]	27.8	hydrazine monohydrate	[N2H4.H2O]	1.03	/	[/]	0	/	[/]	0		0	0	0	0	0	0	0	0	0	0	0	0	3.2526	16.7912	54.069	87.4013	69.489	49.5919	65.401	57.8145	37.7695
569	PANI/GO	Training	Aniline	[Ani]	0.0001	Ammonium persulfate	[APS]	0.1	reduced graphene oxide	[rGO]	10	hydrochloric acid	[HCl]	136	4.66	water	[H2O]	27.8	hydrazine monohydrate	[N2H4.H2O]	1.03	/	[/]	0	/	[/]	0		0	0	0	0	0	0	0	0	0	0	0	0	3.2526	16.7912	54.069	87.4013	69.489	49.5919	65.401	57.8145	37.7695
570	PANI/GO	Training	Aniline	[Ani]	0.0001	Ammonium persulfate	[APS]	0.1	reduced graphene oxide	[rGO]	10	hydrochloric acid	[HCl]	136	4.66	water	[H2O]	27.8	hydrazine monohydrate	[N2H4.H2O]	1.03	/	[/]	0	/	[/]	0		0	0	0	0	0	0	0	0	0	0	0	0	3.2526	16.7912	54.069	87.4013	69.489	49.5919	65.401	57.8145	37.7695
571	PANI/GO	Training	Aniline	[Ani]	0.0001	Ammonium persulfate	[APS]	0.1	reduced graphene oxide	[rGO]	10	hydrochloric acid	[HCl]	136	4.66	water	[H2O]	27.8	Ammonium persulfate	[APS]	0.11	hydrazine monohydrate	[N2H4.H2O]	1.03	/	[/]	0		0	0	0	0	0	0	0	0	0.03355	0.38819	1.60919	2.42044	4.81108	17.4805	54.6237	87.8806	69.8723	49.8558	65.5543	57.9022	37.8553
572	PANI/GO	Training	Aniline	[Ani]	0.0001	Ammonium persulfate	[APS]	0.1	reduced graphene oxide	[rGO]	10	hydrochloric acid	[HCl]	136	4.66	water	[H2O]	27.8	Ammonium persulfate	[APS]	0.11	hydrazine monohydrate	[N2H4.H2O]	1.03	/	[/]	0		0	0	0	0	0	0	0	0	0.03355	0.38819	1.60919	2.42044	4.81108	17.4805	54.6237	87.8806	69.8723	49.8558	65.5543	57.9022	37.8553
573	PANI/GO	Training	Aniline	[Ani]	0.0001	Ammonium persulfate	[APS]	0.1	reduced graphene oxide	[rGO]	10	hydrochloric acid	[HCl]	136	4.66	water	[H2O]	27.8	Ammonium persulfate	[APS]	0.11	hydrazine monohydrate	[N2H4.H2O]	1.03	/	[/]	0		0	0	0	0	0	0	0	0	0.03355	0.38819	1.60919	2.42044	4.81108	17.4805	54.6237	87.8806	69.8723	49.8558	65.5543	57.9022	37.8553
574	PANI /rGO	Training	Aniline	[Ani]	0.008	Ammonium persulfate	[APS]	0.004	reduced graphene oxide	[rGO]	0.2	hydrochloric acid	[HCl]	190	1	sodium dodecylsulfate	[SDS]	20	water	[H2O]	5.6	methanol	[CH3OH]	2.5	acetone	[C3H6O]	1.3		0	0	0	0	0.26	25.56	125.32	195.82	125.32	40.08	14.62	6.76	8.3402	20.6324	36.0065	38.3069	27.1134	19.4988	20.1499	16.2263	10.5085
575	PANI /rGO	Training	Aniline	[Ani]	0.008	Ammonium persulfate	[APS]	0.004	reduced graphene oxide	[rGO]	0.3	hydrochloric acid	[HCl]	190	1	sodium dodecylsulfate	[SDS]	20	water	[H2O]	5.6	methanol	[CH3OH]	2.5	acetone	[C3H6O]	1.3		0	0	0	0	0.26	25.56	125.32	195.82	125.32	40.08	14.62	6.76	8.3402	20.6324	36.0065	38.3069	27.1134	19.4988	20.1499	16.2263	10.5085
576	PANI /rGO	Training	Aniline	[Ani]	0.008	Ammonium persulfate	[APS]	0.004	reduced graphene oxide	[rGO]	0.4	hydrochloric acid	[HCl]	190	1	sodium dodecylsulfate	[SDS]	20	water	[H2O]	5.6	methanol	[CH3OH]	2.5	acetone	[C3H6O]	1.3		0	0	0	0	0.26	25.56	125.32	195.82	125.32	40.08	14.62	6.76	8.3402	20.6324	36.0065	38.3069	27.1134	19.4988	20.1499	16.2263	10.5085
577	PANI /rGO	Training	Aniline	[Ani]	0.008	Ammonium persulfate	[APS]	0.004	reduced graphene oxide	[rGO]	0.5	hydrochloric acid	[HCl]	190	1	sodium dodecylsulfate	[SDS]	20	water	[H2O]	5.6	methanol	[CH3OH]	2.5	acetone	[C3H6O]	1.3		0	0	0	0	0.26	25.56	125.32	195.82	125.32	40.08	14.62	6.76	8.3402	20.6324	36.0065	38.3069	27.1134	19.4988	20.1499	16.2263	10.5085
578	PANI /rGO	Test	Aniline	[Ani]	0.008	Ammonium persulfate	[APS]	0.004	reduced graphene oxide	[rGO]	0.6	hydrochloric acid	[HCl]	190	1	sodium dodecylsulfate	[SDS]	20	water	[H2O]	5.6	methanol	[CH3OH]	2.5	acetone	[C3H6O]	1.3		0	0	0	0	0.26	25.56	125.32	195.82	125.32	40.08	14.62	6.76	8.3402	20.6324	36.0065	38.3069	27.1134	19.4988	20.1499	16.2263	10.5085
579	PANI /rGO	Training	Aniline	[Ani]	0.008	Ammonium persulfate	[APS]	0.004	reduced graphene oxide	[rGO]	0.7	hydrochloric acid	[HCl]	190	1	sodium dodecylsulfate	[SDS]	20	water	[H2O]	5.6	methanol	[CH3OH]	2.5	acetone	[C3H6O]	1.3		0	0	0	0	0.26	25.56	125.32	195.82	125.32	40.08	14.62	6.76	8.3402	20.6324	36.0065	38.3069	27.1134	19.4988	20.1499	16.2263	10.5085
580	PANI /rGO	Training	Aniline	[Ani]	0.008	Ammonium persulfate	[APS]	0.004	reduced graphene oxide	[rGO]	1	hydrochloric acid	[HCl]	190	1	sodium dodecylsulfate	[SDS]	20	water	[H2O]	5.6	methanol	[CH3OH]	2.5	acetone	[C3H6O]	1.3		0	0	0	0	0.26	25.56	125.32	195.82	125.32	40.08	14.62	6.76	8.3402	20.6324	36.0065	38.3069	27.1134	19.4988	20.1499	16.2263	10.5085
581	PANI /rGO	Test	Aniline	[Ani]	0.008	Ammonium persulfate	[APS]	0.004	reduced graphene oxide	[rGO]	0.2	hydrochloric acid	[HCl]	190	1	water	[H2O]	5.6	ammonia solution	[NH4OH]	2.6	methanol	[CH3OH]	2.5	acetone	[C3H6O]	1.3		0	0	0	0	0	0	0	0	0	0	0	0	0.7002	4.5724	13.8303	21.3235	18.8534	17.3592	24.2557	24.8527	19.9967
582	PANI /rGO	Test	Aniline	[Ani]	0.008	Ammonium persulfate	[APS]	0.004	reduced graphene oxide	[rGO]	0.3	hydrochloric acid	[HCl]	190	1	water	[H2O]	5.6	ammonia solution	[NH4OH]	2.6	methanol	[CH3OH]	2.5	acetone	[C3H6O]	1.3		0	0	0	0	0	0	0	0	0	0	0	0	0.7002	4.5724	13.8303	21.3235	18.8534	17.3592	24.2557	24.8527	19.9967
583	PANI /rGO	Test	Aniline	[Ani]	0.008	Ammonium persulfate	[APS]	0.004	reduced graphene oxide	[rGO]	0.4	hydrochloric acid	[HCl]	190	1	water	[H2O]	5.6	ammonia solution	[NH4OH]	2.6	methanol	[CH3OH]	2.5	acetone	[C3H6O]	1.3		0	0	0	0	0	0	0	0	0	0	0	0	0.7002	4.5724	13.8303	21.3235	18.8534	17.3592	24.2557	24.8527	19.9967
584	PANI /rGO	Training	Aniline	[Ani]	0.008	Ammonium persulfate	[APS]	0.004	reduced graphene oxide	[rGO]	0.5	hydrochloric acid	[HCl]	190	1	water	[H2O]	5.6	ammonia solution	[NH4OH]	2.6	methanol	[CH3OH]	2.5	acetone	[C3H6O]	1.3		0	0	0	0	0	0	0	0	0	0	0	0	0.7002	4.5724	13.8303	21.3235	18.8534	17.3592	24.2557	24.8527	19.9967
585	PANI /rGO	Training	Aniline	[Ani]	0.008	Ammonium persulfate	[APS]	0.004	reduced graphene oxide	[rGO]	0.6	hydrochloric acid	[HCl]	190	1	water	[H2O]	5.6	ammonia solution	[NH4OH]	2.6	methanol	[CH3OH]	2.5	acetone	[C3H6O]	1.3		0	0	0	0	0	0	0	0	0	0	0	0	0.7002	4.5724	13.8303	21.3235	18.8534	17.3592	24.2557	24.8527	19.9967
586	PANI /rGO	Training	Aniline	[Ani]	0.008	Ammonium persulfate	[APS]	0.004	reduced graphene oxide	[rGO]	0.7	hydrochloric acid	[HCl]	190	1	water	[H2O]	5.6	ammonia solution	[NH4OH]	2.6	methanol	[CH3OH]	2.5	acetone	[C3H6O]	1.3		0	0	0	0	0	0	0	0	0	0	0	0	0.7002	4.5724	13.8303	21.3235	18.8534	17.3592	24.2557	24.8527	19.9967
587	PANI /rGO	Training	Aniline	[Ani]	0.008	Ammonium persulfate	[APS]	0.004	reduced graphene oxide	[rGO]	1	hydrochloric acid	[HCl]	190	1	water	[H2O]	5.6	ammonia solution	[NH4OH]	2.6	methanol	[CH3OH]	2.5	acetone	[C3H6O]	1.3		0	0	0	0	0	0	0	0	0	0	0	0	0.7002	4.5724	13.8303	21.3235	18.8534	17.3592	24.2557	24.8527	19.9967
588	PANI /rGO	Training	Aniline	[Ani]	0.02	Ammonium persulfate	[APS]	0	reduced graphene oxide	[rGO]	8	hydrochloric acid	[HCl]	200	1	methanol	[CH3OH]	0.5	iodine	[I2]	0.2	/	[/]	0	/	[/]	0		0	0	0	0	0	0	0	0	0	0	0	0	0.009	0.238	0.5605	0.5625	0.543	0.554	0.3649	0.4095	0.5459
589	PANI /rGO	Training	Aniline	[Ani]	0.02	Ammonium persulfate	[APS]	0	reduced graphene oxide	[rGO]	8	hydrochloric acid	[HCl]	200	1	methanol	[CH3OH]	0.5	iodine	[I2]	0.2	/	[/]	0	/	[/]	0		0	0	0	0	0	0	0	0	0	0	0	0	0.009	0.238	0.5605	0.5625	0.543	0.554	0.3649	0.4095	0.5459
590	PANI /rGO	Test	Aniline	[Ani]	0.0025	Ammonium persulfate	[APS]	0.0025	reduced graphene oxide	[rGO]	2	hydrochloric acid	[HCl]	45	1	/	[/]	0	/	[/]	0	/	[/]	0	/	[/]	0		0	0	0	0	0	0	0	0	0	0	0	0	0	0	0	0	0	0	0	0	0
591	PANI /rGO	Test	Aniline	[Ani]	0.0025	Ammonium persulfate	[APS]	0.0025	reduced graphene oxide	[rGO]	2	hydrochloric acid	[HCl]	45	1	/	[/]	0	/	[/]	0	/	[/]	0	/	[/]	0		0	0	0	0	0	0	0	0	0	0	0	0	0	0	0	0	0	0	0	0	0
592	PANI /rGO	Training	Aniline	[Ani]	0.0025	Ammonium persulfate	[APS]	0.0025	reduced graphene oxide	[rGO]	2	hydrochloric acid	[HCl]	45	1	/	[/]	0	/	[/]	0	/	[/]	0	/	[/]	0		0	0	0	0	0	0	0	0	0	0	0	0	0	0	0	0	0	0	0	0	0
593	PANI /rGO	Training	Aniline	[Ani]	0.0025	Ammonium persulfate	[APS]	0.0025	reduced graphene oxide	[rGO]	0.5	hydrochloric acid	[HCl]	45	1	/	[/]	0	/	[/]	0	/	[/]	0	/	[/]	0		0	0	0	0	0	0	0	0	0	0	0	0	0	0	0	0	0	0	0	0	0
594	PANI /rGO	Training	Aniline	[Ani]	0.0025	Ammonium persulfate	[APS]	0.0025	reduced graphene oxide	[rGO]	1	hydrochloric acid	[HCl]	45	1	/	[/]	0	/	[/]	0	/	[/]	0	/	[/]	0		0	0	0	0	0	0	0	0	0	0	0	0	0	0	0	0	0	0	0	0	0
595	PANI /rGO	Training	Aniline	[Ani]	0.0025	Ammonium persulfate	[APS]	0.0025	reduced graphene oxide	[rGO]	2	hydrochloric acid	[HCl]	45	1	/	[/]	0	/	[/]	0	/	[/]	0	/	[/]	0		0	0	0	0	0	0	0	0	0	0	0	0	0	0	0	0	0	0	0	0	0
596	PANI /rGO	Training	Aniline	[Ani]	0.0025	Ammonium persulfate	[APS]	0.0025	reduced graphene oxide	[rGO]	6	hydrochloric acid	[HCl]	45	1	/	[/]	0	/	[/]	0	/	[/]	0	/	[/]	0		0	0	0	0	0	0	0	0	0	0	0	0	0	0	0	0	0	0	0	0	0
597	PANI /rGO	Training	Aniline	[Ani]	0.0025	Ammonium persulfate	[APS]	0.0025	reduced graphene oxide	[rGO]	4	hydrochloric acid	[HCl]	45	1	/	[/]	0	/	[/]	0	/	[/]	0	/	[/]	0		0	0	0	0	0	0	0	0	0	0	0	0	0	0	0	0	0	0	0	0	0
598	PANI /rGO	Training	Aniline	[Ani]	0.0025	Ammonium persulfate	[APS]	0.0025	reduced graphene oxide	[rGO]	6	hydrochloric acid	[HCl]	45	1	/	[/]	0	/	[/]	0	/	[/]	0	/	[/]	0		0	0	0	0	0	0	0	0	0	0	0	0	0	0	0	0	0	0	0	0	0
599	PANI /rGO	Training	Aniline	[Ani]	0.0025	Ammonium persulfate	[APS]	0.0025	reduced graphene oxide	[rGO]	2	hydrochloric acid	[HCl]	45	1	/	[/]	0	/	[/]	0	/	[/]	0	/	[/]	0		0	0	0	0	0	0	0	0	0	0	0	0	0	0	0	0	0	0	0	0	0
600	PANI /rGO	Test	Aniline	[Ani]	0.0025	Ammonium persulfate	[APS]	0.0025	reduced graphene oxide	[rGO]	2	hydrochloric acid	[HCl]	45	1	/	[/]	0	/	[/]	0	/	[/]	0	/	[/]	0		0	0	0	0	0	0	0	0	0	0	0	0	0	0	0	0	0	0	0	0	0
601	PANI /rGO	Training	Aniline	[Ani]	0.0025	Ammonium persulfate	[APS]	0.0025	reduced graphene oxide	[rGO]	2	hydrochloric acid	[HCl]	45	1	/	[/]	0	/	[/]	0	/	[/]	0	/	[/]	0		0	0	0	0	0	0	0	0	0	0	0	0	0	0	0	0	0	0	0	0	0
602	PANI /rGO	Training	Aniline	[Ani]	0.0025	Ammonium persulfate	[APS]	0.0025	reduced graphene oxide	[rGO]	2	hydrochloric acid	[HCl]	45	1	/	[/]	0	/	[/]	0	/	[/]	0	/	[/]	0		0	0	0	0	0	0	0	0	0	0	0	0	0	0	0	0	0	0	0	0	0
603	PANI /rGO	Training	Aniline	[Ani]	0.0025	Ammonium persulfate	[APS]	0.0025	reduced graphene oxide	[rGO]	2	hydrochloric acid	[HCl]	45	1	/	[/]	0	/	[/]	0	/	[/]	0	/	[/]	0		0	0	0	0	0	0	0	0	0	0	0	0	0	0	0	0	0	0	0	0	0
604	PANI /rGO	Training	Aniline	[Ani]	0.0025	Ammonium persulfate	[APS]	0.0025	reduced graphene oxide	[rGO]	2	hydrochloric acid	[HCl]	45	1	/	[/]	0	/	[/]	0	/	[/]	0	/	[/]	0		0	0	0	0	0	0	0	0	0	0	0	0	0	0	0	0	0	0	0	0	0
605	PANI /rGO	Training	Aniline	[Ani]	0.0025	Ammonium persulfate	[APS]	0.0025	reduced graphene oxide	[rGO]	2	hydrochloric acid	[HCl]	45	1	/	[/]	0	/	[/]	0	/	[/]	0	/	[/]	0		0	0	0	0	0	0	0	0	0	0	0	0	0	0	0	0	0	0	0	0	0
606	PANI /rGO	Training	Aniline	[Ani]	0.1	Ammonium persulfate	[APS]	0.15	reduced graphene oxide	[rGO]	10	p-toluenesulfonic acid	[C7H8O3S]	100	0.4	water	[H2O]	56	/	[/]	0	/	[/]	0	/	[/]	0		0	0	0	0	0	0	0	0	0	0	0	0	6.552	33.824	108.64	174.944	137.984	95.088	120.624	100.688	60.76
607	PANI	Training	Aniline	[Ani]	0.2	Ammonium persulfate	[APS]	0.25	/	[/]	0	formic acid	[HCOOH]	48	0.1	water	[H2O]	5.6	acetone	[C3H6O]	1.3	/	[/]	0	/	[/]	0		0	0	0	0	0	0	0	0	0	0	0	0	0.6552	3.3824	10.864	17.4944	13.7984	9.5088	12.0624	10.0688	6.076
608	PANI	Training	Aniline	[Ani]	0.2	Ammonium persulfate	[APS]	0.25	/	[/]	0	formic acid	[HCOOH]	48	0.2	water	[H2O]	5.6	acetone	[C3H6O]	1.3	/	[/]	0	/	[/]	0		0	0	0	0	0	0	0	0	0	0	0	0	0.6552	3.3824	10.864	17.4944	13.7984	9.5088	12.0624	10.0688	6.076
609	PANI	Training	Aniline	[Ani]	0.2	Ammonium persulfate	[APS]	0.25	/	[/]	0	formic acid	[HCOOH]	48	0.5	water	[H2O]	5.6	acetone	[C3H6O]	1.3	/	[/]	0	/	[/]	0		0	0	0	0	0	0	0	0	0	0	0	0	0.6552	3.3824	10.864	17.4944	13.7984	9.5088	12.0624	10.0688	6.076
610	PANI	Training	Aniline	[Ani]	0.2	Ammonium persulfate	[APS]	0.25	/	[/]	0	formic acid	[HCOOH]	48	1	water	[H2O]	5.6	acetone	[C3H6O]	1.3	/	[/]	0	/	[/]	0		0	0	0	0	0	0	0	0	0	0	0	0	0.6552	3.3824	10.864	17.4944	13.7984	9.5088	12.0624	10.0688	6.076
611	PANI	Training	Aniline	[Ani]	0.2	Ammonium persulfate	[APS]	0.25	/	[/]	0	formic acid	[HCOOH]	48	2	water	[H2O]	5.6	acetone	[C3H6O]	1.3	/	[/]	0	/	[/]	0		0	0	0	0	0	0	0	0	0	0	0	0	0.6552	3.3824	10.864	17.4944	13.7984	9.5088	12.0624	10.0688	6.076
612	PANI	Training	Aniline	[Ani]	0.2	Ammonium persulfate	[APS]	0.25	/	[/]	0	formic acid	[HCOOH]	48	5	water	[H2O]	5.6	acetone	[C3H6O]	1.3	/	[/]	0	/	[/]	0		0	0	0	0	0	0	0	0	0	0	0	0	0.6552	3.3824	10.864	17.4944	13.7984	9.5088	12.0624	10.0688	6.076
613	PANI	Training	Aniline	[Ani]	0.2	Ammonium persulfate	[APS]	0.25	/	[/]	0	formic acid	[HCOOH]	48	10	water	[H2O]	5.6	acetone	[C3H6O]	1.3	/	[/]	0	/	[/]	0		0	0	0	0	0	0	0	0	0	0	0	0	0.6552	3.3824	10.864	17.4944	13.7984	9.5088	12.0624	10.0688	6.076
614	PANI	Training	Aniline	[Ani]	0.0107	Ammonium persulfate	[APS]	0.0107	/	[/]	0	formic acid	[HCOOH]	50	10	water	[H2O]	5.6	/	[/]	0	/	[/]	0	/	[/]	0		0	0	0	0	0	0	0	0	0	0	0	0	0.6552	3.3824	10.864	17.4944	13.7984	9.5088	12.0624	10.0688	6.076
615	PANI	Training	Aniline	[Ani]	0.0002	Ammonium persulfate	[APS]	0.0526	/	[/]	0	sulferic acid	[H2SO4]	50	1	hydrochloric acid	[HCl]	6.6	/	[/]	0	/	[/]	0	/	[/]	0		0	0	0	0	0	0	0	0	0	0	0	0.0132	2.3958	8.0982	12.276	10.2168	4.9566	4.8444	6.2436	2.6994	0.3498
616	PANI	Training	Aniline	[Ani]	0.0002	Ammonium persulfate	[APS]	0.0526	/	[/]	0	hydrochloric acid	[HCl]	50	1	hydrochloric acid	[HCl]	6.6	/	[/]	0	/	[/]	0	/	[/]	0		0	0	0	0	0	0	0	0	0	0	0	0.0132	2.3958	8.0982	12.276	10.2168	4.9566	4.8444	6.2436	2.6994	0.3498
[truncated: 47 more columns]

## Sheet: Table S2
	Table S2. Experimental dataset and literature citations for published Gas Sensing Response values.
#	Polymer System#	Set	Monomer			Oxidant			Graphene Filler			Doping Agent				Additive 1			Additive 2			Additive 3			σ-profiles, Additives mix
			Type	Abb.	Amount (mole)	Type	Abb.	Amount (mole)	Type	Abb.	Loading (wt%)	Type	Abb.	Volume (ml)	Concentration (mol/l)	Type	Abb.	Amount (mole)	Type	Abb.	Amount (mole)	Type	Abb.	Amount (mole)		σ1	σ2	σ3	σ4	σ5	σ6	σ7	σ8	σ9	σ10	σ11	σ12	σ13	σ14	σ15	σ16	σ17	σ18	σ19	σ20	σ21	σ22	σ23	σ24
1	PANI	Training	Aniline	[Ani]	0.005	Ammonium persulfate	[APS]	0.005	/	[/]	0	Iodine	[I2]	50	1	Ammonia solution	[NH4OH]	0.1	/	[/]	0	/	[/]	0		0	0	0	0	0	0	0	0	0	0	0	0	0	0	0.0063	0.0391	0.09	0.1954	0.4033	0.5364	0.5157	0.4649	0.4336	0.4029
2	PANI	Test	Aniline	[Ani]	0.005	Ammonium persulfate	[APS]	0.005	/	[/]	0	Iodine	[I2]	50	1	Ammonia solution	[NH4OH]	0.1	/	[/]	0	/	[/]	0		0	0	0	0	0	0	0	0	0	0	0	0	0	0	0.0063	0.0391	0.09	0.1954	0.4033	0.5364	0.5157	0.4649	0.4336	0.4029
3	PANI	Training	Aniline	[Ani]	0.005	Ammonium persulfate	[APS]	0.005	/	[/]	0	Iodine	[I2]	50	1	Ammonia solution	[NH4OH]	0.1	/	[/]	0	/	[/]	0		0	0	0	0	0	0	0	0	0	0	0	0	0	0	0.0063	0.0391	0.09	0.1954	0.4033	0.5364	0.5157	0.4649	0.4336	0.4029
4	PANI	Training	Aniline	[Ani]	0.005	Ammonium persulfate	[APS]	0.005	/	[/]	0	Iodine	[I2]	50	1	Ammonia solution	[NH4OH]	0.1	/	[/]	0	/	[/]	0		0	0	0	0	0	0	0	0	0	0	0	0	0	0	0.0063	0.0391	0.09	0.1954	0.4033	0.5364	0.5157	0.4649	0.4336	0.4029
5	PANI	Test	Aniline	[Ani]	0.005	Ammonium persulfate	[APS]	0.005	/	[/]	0	Iodine	[I2]	50	1	Ammonia solution	[NH4OH]	0.1	/	[/]	0	/	[/]	0		0	0	0	0	0	0	0	0	0	0	0	0	0	0	0.0063	0.0391	0.09	0.1954	0.4033	0.5364	0.5157	0.4649	0.4336	0.4029
6	PANI	Training	Aniline	[Ani]	0.005	Ammonium persulfate	[APS]	0.005	/	[/]	0	Iodine	[I2]	50	1	Ammonia solution	[NH4OH]	0.1	/	[/]	0	/	[/]	0		0	0	0	0	0	0	0	0	0	0	0	0	0	0	0.0063	0.0391	0.09	0.1954	0.4033	0.5364	0.5157	0.4649	0.4336	0.4029
7	PANI	Training	Aniline	[Ani]	0.005	Ammonium persulfate	[APS]	0.005	/	[/]	0	Hydrochloric acid	[HCl]	50	1	Water	[H2O]	2.7778	/	[/]	0	/	[/]	0		0	0	0	0	0	0	0	0	0	0	0	0	0.325003	1.67779	5.38893	8.67785	6.8445	4.7167	5.98338	4.99448	3.01391	3.55558	3.09725	1.48612
8	PANI	Training	Aniline	[Ani]	0.005	Ammonium persulfate	[APS]	0.005	/	[/]	0	Hydrochloric acid	[HCl]	50	1	Water	[H2O]	2.7778	/	[/]	0	/	[/]	0		0	0	0	0	0	0	0	0	0	0	0	0	0.325003	1.67779	5.38893	8.67785	6.8445	4.7167	5.98338	4.99448	3.01391	3.55558	3.09725	1.48612
9	PANI	Training	Aniline	[Ani]	0.005	Ammonium persulfate	[APS]	0.005	/	[/]	0	Hydrochloric acid	[HCl]	50	1	Water	[H2O]	2.7778	/	[/]	0	/	[/]	0		0	0	0	0	0	0	0	0	0	0	0	0	0.325003	1.67779	5.38893	8.67785	6.8445	4.7167	5.98338	4.99448	3.01391	3.55558	3.09725	1.48612
10	PANI	Training	Aniline	[Ani]	0.005	Ammonium persulfate	[APS]	0.005	/	[/]	0	Hydrochloric acid	[HCl]	50	1	Water	[H2O]	2.7778	/	[/]	0	/	[/]	0		0	0	0	0	0	0	0	0	0	0	0	0	0.325003	1.67779	5.38893	8.67785	6.8445	4.7167	5.98338	4.99448	3.01391	3.55558	3.09725	1.48612
11	PANI	Training	Aniline	[Ani]	0.005	Ammonium persulfate	[APS]	0.005	/	[/]	0	Hydrochloric acid	[HCl]	50	1	Water	[H2O]	2.7778	/	[/]	0	/	[/]	0		0	0	0	0	0	0	0	0	0	0	0	0	0.325003	1.67779	5.38893	8.67785	6.8445	4.7167	5.98338	4.99448	3.01391	3.55558	3.09725	1.48612
12	PANI	Training	Aniline	[Ani]	0.005	Ammonium persulfate	[APS]	0.005	/	[/]	0	Hydrochloric acid	[HCl]	50	1	Water	[H2O]	2.7778	/	[/]	0	/	[/]	0		0	0	0	0	0	0	0	0	0	0	0	0	0.325003	1.67779	5.38893	8.67785	6.8445	4.7167	5.98338	4.99448	3.01391	3.55558	3.09725	1.48612
13	PANI	Test	Aniline	[Ani]	0.005	Ammonium persulfate	[APS]	0.005	/	[/]	0	Hydrochloric acid	[HCl]	50	1	Water	[H2O]	2.7778	/	[/]	0	/	[/]	0		0	0	0	0	0	0	0	0	0	0	0	0	0.325003	1.67779	5.38893	8.67785	6.8445	4.7167	5.98338	4.99448	3.01391	3.55558	3.09725	1.48612
14	PANI	Training	Aniline	[Ani]	0.005	Ammonium persulfate	[APS]	0.005	/	[/]	0	Hydrochloric acid	[HCl]	50	1	Water	[H2O]	2.7778	/	[/]	0	/	[/]	0		0	0	0	0	0	0	0	0	0	0	0	0	0.325003	1.67779	5.38893	8.67785	6.8445	4.7167	5.98338	4.99448	3.01391	3.55558	3.09725	1.48612
15	PANI	Training	Aniline	[Ani]	0.005	Ammonium persulfate	[APS]	0.005	/	[/]	0	Hydrochloric acid	[HCl]	50	1	Water	[H2O]	2.7778	/	[/]	0	/	[/]	0		0	0	0	0	0	0	0	0	0	0	0	0	0.325003	1.67779	5.38893	8.67785	6.8445	4.7167	5.98338	4.99448	3.01391	3.55558	3.09725	1.48612
16	PANI	Training	Aniline	[Ani]	0.005	Ammonium persulfate	[APS]	0.005	/	[/]	0	Hydrochloric acid	[HCl]	50	1	Water	[H2O]	2.7778	/	[/]	0	/	[/]	0		0	0	0	0	0	0	0	0	0	0	0	0	0.325003	1.67779	5.38893	8.67785	6.8445	4.7167	5.98338	4.99448	3.01391	3.55558	3.09725	1.48612
17	PANI	Training	Aniline	[Ani]	0.005	Ammonium persulfate	[APS]	0.005	/	[/]	0	Hydrochloric acid	[HCl]	50	1	Water	[H2O]	2.7778	/	[/]	0	/	[/]	0		0	0	0	0	0	0	0	0	0	0	0	0	0.325003	1.67779	5.38893	8.67785	6.8445	4.7167	5.98338	4.99448	3.01391	3.55558	3.09725	1.48612
18	PANI	Training	Aniline	[Ani]	0.005	Ammonium persulfate	[APS]	0.005	/	[/]	0	Hydrochloric acid	[HCl]	50	1	Water	[H2O]	2.7778	/	[/]	0	/	[/]	0		0	0	0	0	0	0	0	0	0	0	0	0	0.325003	1.67779	5.38893	8.67785	6.8445	4.7167	5.98338	4.99448	3.01391	3.55558	3.09725	1.48612
19	PANI	Test	Aniline	[Ani]	0.005	Ammonium persulfate	[APS]	0.005	/	[/]	0	Hydrochloric acid	[HCl]	50	1	Water	[H2O]	2.7778	/	[/]	0	/	[/]	0		0	0	0	0	0	0	0	0	0	0	0	0	0.325003	1.67779	5.38893	8.67785	6.8445	4.7167	5.98338	4.99448	3.01391	3.55558	3.09725	1.48612
20	PANI	Test	Aniline	[Ani]	0.005	Ammonium persulfate	[APS]	0.005	/	[/]	0	Hydrochloric acid	[HCl]	50	1	Water	[H2O]	2.7778	/	[/]	0	/	[/]	0		0	0	0	0	0	0	0	0	0	0	0	0	0.325003	1.67779	5.38893	8.67785	6.8445	4.7167	5.98338	4.99448	3.01391	3.55558	3.09725	1.48612
21	PANI	Test	Aniline	[Ani]	0.005	Ammonium persulfate	[APS]	0.005	/	[/]	0	Hydrochloric acid	[HCl]	50	1	Water	[H2O]	2.7778	/	[/]	0	/	[/]	0		0	0	0	0	0	0	0	0	0	0	0	0	0.325003	1.67779	5.38893	8.67785	6.8445	4.7167	5.98338	4.99448	3.01391	3.55558	3.09725	1.48612
22	PANI	Training	Aniline	[Ani]	0.005	Ammonium persulfate	[APS]	0.005	/	[/]	0	Hydrochloric acid	[HCl]	50	1	Water	[H2O]	2.7778	/	[/]	0	/	[/]	0		0	0	0	0	0	0	0	0	0	0	0	0	0.325003	1.67779	5.38893	8.67785	6.8445	4.7167	5.98338	4.99448	3.01391	3.55558	3.09725	1.48612
23	PANI	Training	Aniline	[Ani]	0.005	Ammonium persulfate	[APS]	0.005	/	[/]	0	Hydrochloric acid	[HCl]	50	1	Water	[H2O]	2.7778	/	[/]	0	/	[/]	0		0	0	0	0	0	0	0	0	0	0	0	0	0.325003	1.67779	5.38893	8.67785	6.8445	4.7167	5.98338	4.99448	3.01391	3.55558	3.09725	1.48612
24	PANI	Training	Aniline	[Ani]	0.005	Ammonium persulfate	[APS]	0.005	/	[/]	0	Hydrochloric acid	[HCl]	50	1	Water	[H2O]	2.7778	/	[/]	0	/	[/]	0		0	0	0	0	0	0	0	0	0	0	0	0	0.325003	1.67779	5.38893	8.67785	6.8445	4.7167	5.98338	4.99448	3.01391	3.55558	3.09725	1.48612
25	PANI	Test	Aniline	[Ani]	0.005	Ammonium persulfate	[APS]	0.005	/	[/]	0	Hydrochloric acid	[HCl]	50	1	Water	[H2O]	2.7778	/	[/]	0	/	[/]	0		0	0	0	0	0	0	0	0	0	0	0	0	0.325003	1.67779	5.38893	8.67785	6.8445	4.7167	5.98338	4.99448	3.01391	3.55558	3.09725	1.48612
26	PANI	Training	Aniline	[Ani]	0.005	Ammonium persulfate	[APS]	0.005	/	[/]	0	Hydrochloric acid	[HCl]	50	1	Water	[H2O]	2.7778	/	[/]	0	/	[/]	0		0	0	0	0	0	0	0	0	0	0	0	0	0.325003	1.67779	5.38893	8.67785	6.8445	4.7167	5.98338	4.99448	3.01391	3.55558	3.09725	1.48612
27	PANI	Training	Aniline	[Ani]	0.005	Ammonium persulfate	[APS]	0.005	/	[/]	0	Hydrochloric acid	[HCl]	50	1	Water	[H2O]	2.7778	/	[/]	0	/	[/]	0		0	0	0	0	0	0	0	0	0	0	0	0	0.325003	1.67779	5.38893	8.67785	6.8445	4.7167	5.98338	4.99448	3.01391	3.55558	3.09725	1.48612
28	PANI	Test	Aniline	[Ani]	0.005	Ammonium persulfate	[APS]	0.005	/	[/]	0	Hydrochloric acid	[HCl]	50	1	Water	[H2O]	2.7778	/	[/]	0	/	[/]	0		0	0	0	0	0	0	0	0	0	0	0	0	0.325003	1.67779	5.38893	8.67785	6.8445	4.7167	5.98338	4.99448	3.01391	3.55558	3.09725	1.48612
29	PANI	Training	Aniline	[Ani]	0.005	Ammonium persulfate	[APS]	0.005	/	[/]	0	Hydrochloric acid	[HCl]	50	1	Water	[H2O]	2.7778	/	[/]	0	/	[/]	0		0	0	0	0	0	0	0	0	0	0	0	0	0.325003	1.67779	5.38893	8.67785	6.8445	4.7167	5.98338	4.99448	3.01391	3.55558	3.09725	1.48612
30	PANI	Training	Aniline	[Ani]	0.005	Ammonium persulfate	[APS]	0.005	/	[/]	0	Hydrochloric acid	[HCl]	50	1	Water	[H2O]	2.7778	/	[/]	0	/	[/]	0		0	0	0	0	0	0	0	0	0	0	0	0	0.325003	1.67779	5.38893	8.67785	6.8445	4.7167	5.98338	4.99448	3.01391	3.55558	3.09725	1.48612
31	PANI	Test	Aniline	[Ani]	0.005	Ammonium persulfate	[APS]	0.005	/	[/]	0	Iodine	[I2]	50	1	Ammonia solution	[NH4OH]	0.1	/	[/]	0	/	[/]	0		0	0	0	0	0	0	0	0	0	0	0	0	0	0	0.0063	0.0391	0.09	0.1954	0.4033	0.5364	0.5157	0.4649	0.4336	0.4029
32	PANI	Test	Aniline	[Ani]	0.005	Ammonium persulfate	[APS]	0.005	/	[/]	0	Iodine	[I2]	50	1	Ammonia solution	[NH4OH]	0.1	/	[/]	0	/	[/]	0		0	0	0	0	0	0	0	0	0	0	0	0	0	0	0.0063	0.0391	0.09	0.1954	0.4033	0.5364	0.5157	0.4649	0.4336	0.4029
33	PANI	Test	Aniline	[Ani]	0.005	Ammonium persulfate	[APS]	0.005	/	[/]	0	Iodine	[I2]	50	1	Ammonia solution	[NH4OH]	0.1	/	[/]	0	/	[/]	0		0	0	0	0	0	0	0	0	0	0	0	0	0	0	0.0063	0.0391	0.09	0.1954	0.4033	0.5364	0.5157	0.4649	0.4336	0.4029
34	PANI	Training	Aniline	[Ani]	0.005	Ammonium persulfate	[APS]	0.005	/	[/]	0	Iodine	[I2]	50	1	Ammonia solution	[NH4OH]	0.1	/	[/]	0	/	[/]	0		0	0	0	0	0	0	0	0	0	0	0	0	0	0	0.0063	0.0391	0.09	0.1954	0.4033	0.5364	0.5157	0.4649	0.4336	0.4029
35	PANI	Training	Aniline	[Ani]	0.005	Ammonium persulfate	[APS]	0.005	/	[/]	0	Iodine	[I2]	50	1	Ammonia solution	[NH4OH]	0.1	/	[/]	0	/	[/]	0		0	0	0	0	0	0	0	0	0	0	0	0	0	0	0.0063	0.0391	0.09	0.1954	0.4033	0.5364	0.5157	0.4649	0.4336	0.4029
36	PANI	Test	Aniline	[Ani]	0.005	Ammonium persulfate	[APS]	0.005	/	[/]	0	Iodine	[I2]	50	1	Ammonia solution	[NH4OH]	0.1	/	[/]	0	/	[/]	0		0	0	0	0	0	0	0	0	0	0	0	0	0	0	0.0063	0.0391	0.09	0.1954	0.4033	0.5364	0.5157	0.4649	0.4336	0.4029
37	PANI/rGO	Training	Aniline	[Ani]	0.011	/	[/]	0	reduced Graphene oxide	[rGO]	1	Hydrochloric acid	[HCl]	50	1	Water	[H2O]	2.7778	/	[/]	0	/	[/]	0		0	0	0	0	0	0	0	0	0	0	0	0	0.325003	1.67779	5.38893	8.67785	6.8445	4.7167	5.98338	4.99448	3.01391	3.55558	3.09725	1.48612
38	PANI/rGO	Training	Aniline	[Ani]	0.011	/	[/]	0	reduced Graphene oxide	[rGO]	1	Hydrochloric acid	[HCl]	50	1	Water	[H2O]	2.7778	/	[/]	0	/	[/]	0		0	0	0	0	0	0	0	0	0	0	0	0	0.325003	1.67779	5.38893	8.67785	6.8445	4.7167	5.98338	4.99448	3.01391	3.55558	3.09725	1.48612
39	PANI/rGO	Training	Aniline	[Ani]	0.011	/	[/]	0	reduced Graphene oxide	[rGO]	1	Hydrochloric acid	[HCl]	50	1	Water	[H2O]	2.7778	/	[/]	0	/	[/]	0		0	0	0	0	0	0	0	0	0	0	0	0	0.325003	1.67779	5.38893	8.67785	6.8445	4.7167	5.98338	4.99448	3.01391	3.55558	3.09725	1.48612
40	PANI/rGO	Training	Aniline	[Ani]	0.011	/	[/]	0	reduced Graphene oxide	[rGO]	1	Hydrochloric acid	[HCl]	50	1	Water	[H2O]	2.7778	/	[/]	0	/	[/]	0		0	0	0	0	0	0	0	0	0	0	0	0	0.325003	1.67779	5.38893	8.67785	6.8445	4.7167	5.98338	4.99448	3.01391	3.55558	3.09725	1.48612
41	PANI	Test	Aniline	[Ani]	0.002	Ammonium persulfate	[APS]	0.0025	/	[/]	0	Hydrochloric acid	[HCl]	50	1	Water	[H2O]	5.5556	/	[/]	0	/	[/]	0		0	0	0	0	0	0	0	0	0	0	0	0	0.650005	3.35558	10.7779	17.3557	13.689	9.43341	11.9668	9.98897	6.02783	7.11117	6.19449	2.97225
42	PANI/Gr	Training	Aniline	[Ani]	0.002	Ammonium persulfate	[APS]	0.002	Graphene	[Gr]	3	Hydrochloric acid	[HCl]	100	1	Water	[H2O]	4.4444	/	[/]	0	/	[/]	0		0	0	0	0	0	0	0	0	0	0	0	0	0.519995	2.68442	8.62214	13.8843	10.951	7.54659	9.57324	7.99103	4.82217	5.68883	4.95551	2.37775
43	PANI/Gr	Training	Aniline	[Ani]	0.002	Ammonium persulfate	[APS]	0.002	Graphene	[Gr]	3	Hydrochloric acid	[HCl]	100	1	Water	[H2O]	4.4444	/	[/]	0	/	[/]	0		0	0	0	0	0	0	0	0	0	0	0	0	0.519995	2.68442	8.62214	13.8843	10.951	7.54659	9.57324	7.99103	4.82217	5.68883	4.95551	2.37775
44	PANI/Gr	Training	Aniline	[Ani]	0.002	Ammonium persulfate	[APS]	0.002	Graphene	[Gr]	3	Hydrochloric acid	[HCl]	100	1	Water	[H2O]	4.4444	/	[/]	0	/	[/]	0		0	0	0	0	0	0	0	0	0	0	0	0	0.519995	2.68442	8.62214	13.8843	10.951	7.54659	9.57324	7.99103	4.82217	5.68883	4.95551	2.37775
45	PANI/Gr	Training	Aniline	[Ani]	0.002	Ammonium persulfate	[APS]	0.002	Graphene	[Gr]	3	Hydrochloric acid	[HCl]	100	1	Water	[H2O]	4.4444	/	[/]	0	/	[/]	0		0	0	0	0	0	0	0	0	0	0	0	0	0.519995	2.68442	8.62214	13.8843	10.951	7.54659	9.57324	7.99103	4.82217	5.68883	4.95551	2.37775
46	PANI/Gr	Training	Aniline	[Ani]	0.002	Ammonium persulfate	[APS]	0.002	Graphene	[Gr]	3	Hydrochloric acid	[HCl]	100	1	Water	[H2O]	4.4444	/	[/]	0	/	[/]	0		0	0	0	0	0	0	0	0	0	0	0	0	0.519995	2.68442	8.62214	13.8843	10.951	7.54659	9.57324	7.99103	4.82217	5.68883	4.95551	2.37775
47	PANI/Gr	Training	Aniline	[Ani]	0.002	Ammonium persulfate	[APS]	0.002	Graphene	[Gr]	3	Hydrochloric acid	[HCl]	100	1	Water	[H2O]	4.4444	/	[/]	0	/	[/]	0		0	0	0	0	0	0	0	0	0	0	0	0	0.519995	2.68442	8.62214	13.8843	10.951	7.54659	9.57324	7.99103	4.82217	5.68883	4.95551	2.37775
48	PANI/Gr	Test	Aniline	[Ani]	0.002	Ammonium persulfate	[APS]	0.002	Graphene	[Gr]	3	Hydrochloric acid	[HCl]	100	1	Water	[H2O]	4.4444	/	[/]	0	/	[/]	0		0	0	0	0	0	0	0	0	0	0	0	0	0.519995	2.68442	8.62214	13.8843	10.951	7.54659	9.57324	7.99103	4.82217	5.68883	4.95551	2.37775
49	PANI	Training	Aniline	[Ani]	0.0011	Ammonium persulfate	[APS]	0.1	/	[/]	0	Hydrochloric acid	[HCl]	50	1	/	[/]	0	/	[/]	0	/	[/]	0		0	0	0	0	0	0	0	0	0	0	0	0	0	0	0	0	0	0	0	0	0	0	0	0
50	PANI	Training	Aniline	[Ani]	0.0011	Ammonium persulfate	[APS]	0.1	/	[/]	0	Hydrochloric acid	[HCl]	50	1	/	[/]	0	/	[/]	0	/	[/]	0		0	0	0	0	0	0	0	0	0	0	0	0	0	0	0	0	0	0	0	0	0	0	0	0
51	PANI	Training	Aniline	[Ani]	0.0011	Ammonium persulfate	[APS]	0.1	/	[/]	0	Hydrochloric acid	[HCl]	50	1	/	[/]	0	/	[/]	0	/	[/]	0		0	0	0	0	0	0	0	0	0	0	0	0	0	0	0	0	0	0	0	0	0	0	0	0
52	PANI	Training	Aniline	[Ani]	0.0011	Ammonium persulfate	[APS]	0.1	/	[/]	0	Hydrochloric acid	[HCl]	50	1	/	[/]	0	/	[/]	0	/	[/]	0		0	0	0	0	0	0	0	0	0	0	0	0	0	0	0	0	0	0	0	0	0	0	0	0
53	PANI	Training	Aniline	[Ani]	0.0011	Ammonium persulfate	[APS]	0.1	/	[/]	0	Hydrochloric acid	[HCl]	50	1	/	[/]	0	/	[/]	0	/	[/]	0		0	0	0	0	0	0	0	0	0	0	0	0	0	0	0	0	0	0	0	0	0	0	0	0
54	PANI	Training	Aniline	[Ani]	0.0015	Ammonium persulfate	[APS]	0.0015	/	[/]	0	Hydrochloric acid	[HCl]	30	1	/	[/]	0	/	[/]	0	/	[/]	0		0	0	0	0	0	0	0	0	0	0	0	0	0	0	0	0	0	0	0	0	0	0	0	0
55	PANI/rGO	Test	Aniline	[Ani]	0.0015	Ammonium persulfate	[APS]	0.0015	reduced Graphene oxide	[rGO]	1	Hydrochloric acid	[HCl]	30	1	/	[/]	0	/	[/]	0	/	[/]	0		0	0	0	0	0	0	0	0	0	0	0	0	0	0	0	0	0	0	0	0	0	0	0	0
56	PANI	Test	Aniline	[Ani]	0.0004	Ammonium persulfate	[APS]	0.0002	/	[/]	0	Hydrochloric acid	[HCl]	10	1	/	[/]	0	/	[/]	0	/	[/]	0		0	0	0	0	0	0	0	0	0	0	0	0	0	0	0	0	0	0	0	0	0	0	0	0
57	PANI/rGO	Training	Aniline	[Ani]	0.0004	Ammonium persulfate	[APS]	0.0002	reduced Graphene oxide	[rGO]	10	Hydrochloric acid	[HCl]	10	1	/	[/]	0	/	[/]	0	/	[/]	0		0	0	0	0	0	0	0	0	0	0	0	0	0	0	0	0	0	0	0	0	0	0	0	0
58	PANI	Training	Aniline	[Ani]	0.0004	Ammonium persulfate	[APS]	0.0002	/	[/]	0	Hydrochloric acid	[HCl]	10	1	/	[/]	0	/	[/]	0	/	[/]	0		0	0	0	0	0	0	0	0	0	0	0	0	0	0	0	0	0	0	0	0	0	0	0	0
59	PANI/rGO	Training	Aniline	[Ani]	0.0004	Ammonium persulfate	[APS]	0.0002	reduced Graphene oxide	[rGO]	10	Hydrochloric acid	[HCl]	10	1	/	[/]	0	/	[/]	0	/	[/]	0		0	0	0	0	0	0	0	0	0	0	0	0	0	0	0	0	0	0	0	0	0	0	0	0
60	PANI	Test	Aniline	[Ani]	0.0004	Ammonium persulfate	[APS]	0.0002	/	[/]	0	Hydrochloric acid	[HCl]	10	1	/	[/]	0	/	[/]	0	/	[/]	0		0	0	0	0	0	0	0	0	0	0	0	0	0	0	0	0	0	0	0	0	0	0	0	0
61	PANI/rGO	Training	Aniline	[Ani]	0.0004	Ammonium persulfate	[APS]	0.0002	reduced Graphene oxide	[rGO]	10	Hydrochloric acid	[HCl]	10	1	/	[/]	0	/	[/]	0	/	[/]	0		0	0	0	0	0	0	0	0	0	0	0	0	0	0	0	0	0	0	0	0	0	0	0	0
62	PANI/rGO	Training	Aniline	[Ani]	0.0004	Ammonium persulfate	[APS]	0.0002	reduced Graphene oxide	[rGO]	20	Hydrochloric acid	[HCl]	10	1	/	[/]	0	/	[/]	0	/	[/]	0		0	0	0	0	0	0	0	0	0	0	0	0	0	0	0	0	0	0	0	0	0	0	0	0
63	PANI/rGO	Training	Aniline	[Ani]	0.0004	Ammonium persulfate	[APS]	0.0002	reduced Graphene oxide	[rGO]	10	Hydrochloric acid	[HCl]	10	1	/	[/]	0	/	[/]	0	/	[/]	0		0	0	0	0	0	0	0	0	0	0	0	0	0	0	0	0	0	0	0	0	0	0	0	0
64	PANI/rGO	Training	Aniline	[Ani]	0.0004	Ammonium persulfate	[APS]	0.0002	reduced Graphene oxide	[rGO]	5	Hydrochloric acid	[HCl]	10	1	/	[/]	0	/	[/]	0	/	[/]	0		0	0	0	0	0	0	0	0	0	0	0	0	0	0	0	0	0	0	0	0	0	0	0	0
65	PANI/rGO	Training	Aniline	[Ani]	0.0004	Ammonium persulfate	[APS]	0.0002	reduced Graphene oxide	[rGO]	2	Hydrochloric acid	[HCl]	10	1	/	[/]	0	/	[/]	0	/	[/]	0		0	0	0	0	0	0	0	0	0	0	0	0	0	0	0	0	0	0	0	0	0	0	0	0
66	PANI/rGO	Training	Aniline	[Ani]	0.0004	Ammonium persulfate	[APS]	0.0002	reduced Graphene oxide	[rGO]	10	Hydrochloric acid	[HCl]	10	1	/	[/]	0	/	[/]	0	/	[/]	0		0	0	0	0	0	0	0	0	0	0	0	0	0	0	0	0	0	0	0	0	0	0	0	0
67	PANI/rGO	Training	Aniline	[Ani]	0.0004	Ammonium persulfate	[APS]	0.0002	reduced Graphene oxide	[rGO]	10	Hydrochloric acid	[HCl]	10	1	/	[/]	0	/	[/]	0	/	[/]	0		0	0	0	0	0	0	0	0	0	0	0	0	0	0	0	0	0	0	0	0	0	0	0	0
68	PANI/rGO	Test	Aniline	[Ani]	0.0004	Ammonium persulfate	[APS]	0.0002	reduced Graphene oxide	[rGO]	10	Hydrochloric acid	[HCl]	10	1	/	[/]	0	/	[/]	0	/	[/]	0		0	0	0	0	0	0	0	0	0	0	0	0	0	0	0	0	0	0	0	0	0	0	0	0
69	PANI/rGO	Training	Aniline	[Ani]	0.0004	Ammonium persulfate	[APS]	0.0002	reduced Graphene oxide	[rGO]	10	Hydrochloric acid	[HCl]	10	1	/	[/]	0	/	[/]	0	/	[/]	0		0	0	0	0	0	0	0	0	0	0	0	0	0	0	0	0	0	0	0	0	0	0	0	0
70	PANI/rGO	Training	Aniline	[Ani]	0.0004	Ammonium persulfate	[APS]	0.0002	reduced Graphene oxide	[rGO]	10	Hydrochloric acid	[HCl]	10	1	/	[/]	0	/	[/]	0	/	[/]	0		0	0	0	0	0	0	0	0	0	0	0	0	0	0	0	0	0	0	0	0	0	0	0	0
71	PANI/rGO	Test	Aniline	[Ani]	0.0004	Ammonium persulfate	[APS]	0.0002	reduced Graphene oxide	[rGO]	10	Hydrochloric acid	[HCl]	10	1	/	[/]	0	/	[/]	0	/	[/]	0		0	0	0	0	0	0	0	0	0	0	0	0	0	0	0	0	0	0	0	0	0	0	0	0
72	PANI/rGO	Training	Aniline	[Ani]	0.0004	Ammonium persulfate	[APS]	0.0002	reduced Graphene oxide	[rGO]	10	Hydrochloric acid	[HCl]	10	1	/	[/]	0	/	[/]	0	/	[/]	0		0	0	0	0	0	0	0	0	0	0	0	0	0	0	0	0	0	0	0	0	0	0	0	0
73	PANI	Training	Aniline	[Ani]	0.25	Ammonium persulfate	[APS]	0.1	/	[/]	0	Hydrochloric acid	[HCl]	50	3.5	Water	[H2O]	27.7778	/	[/]	0	/	[/]	0		0	0	0	0	0	0	0	0	0	0	0	0	3.25	16.7778	53.8889	86.7778	68.4445	47.1667	59.8334	49.9445	30.1389	35.5556	30.9722	14.8611
74	PANI	Training	Aniline	[Ani]	0.0032	Ammonium persulfate	[APS]	0.0008	/	[/]	0	Hydrochloric acid	[HCl]	10	1	Water	[H2O]	2.7778	Tetrachloromethane	[CCl4]	0.1034	/	[/]	0		0	0	0	0	0	0	0	0	0	0	0	0	0.325003	1.67779	5.38893	8.67785	6.8445	4.7167	5.98338	4.99448	3.01391	3.58154	3.18762	1.85919
75	PANI	Training	Aniline	[Ani]	0.0032	Ammonium persulfate	[APS]	0.0008	/	[/]	0	Hydrochloric acid	[HCl]	10	0.1	Water	[H2O]	2.7778	Tetrachloromethane	[CCl4]	0.1034	/	[/]	0		0	0	0	0	0	0	0	0	0	0	0	0	0.325003	1.67779	5.38893	8.67785	6.8445	4.7167	5.98338	4.99448	3.01391	3.58154	3.18762	1.85919
76	PANI	Training	Aniline	[Ani]	0.0032	Ammonium persulfate	[APS]	0.0008	/	[/]	0	Hydrochloric acid	[HCl]	10	0.1	Water	[H2O]	2.7778	Tetrachloromethane	[CCl4]	0.1034	/	[/]	0		0	0	0	0	0	0	0	0	0	0	0	0	0.325003	1.67779	5.38893	8.67785	6.8445	4.7167	5.98338	4.99448	3.01391	3.58154	3.18762	1.85919
77	PANI	Test	Aniline	[Ani]	0.0032	Ammonium persulfate	[APS]	0.0008	/	[/]	0	Hydrochloric acid	[HCl]	10	0.1	Water	[H2O]	2.7778	Tetrachloromethane	[CCl4]	0.1034	/	[/]	0		0	0	0	0	0	0	0	0	0	0	0	0	0.325003	1.67779	5.38893	8.67785	6.8445	4.7167	5.98338	4.99448	3.01391	3.58154	3.18762	1.85919
78	PANI	Training	Aniline	[Ani]	0.0032	Ammonium persulfate	[APS]	0.0008	/	[/]	0	Hydrochloric acid	[HCl]	10	0.1	Water	[H2O]	2.7778	Tetrachloromethane	[CCl4]	0.1034	/	[/]	0		0	0	0	0	0	0	0	0	0	0	0	0	0.325003	1.67779	5.38893	8.67785	6.8445	4.7167	5.98338	4.99448	3.01391	3.58154	3.18762	1.85919
79	PANI	Training	Aniline	[Ani]	0.0032	Ammonium persulfate	[APS]	0.0008	/	[/]	0	Hydrochloric acid	[HCl]	10	0.1	Water	[H2O]	2.7778	Tetrachloromethane	[CCl4]	0.1034	/	[/]	0		0	0	0	0	0	0	0	0	0	0	0	0	0.325003	1.67779	5.38893	8.67785	6.8445	4.7167	5.98338	4.99448	3.01391	3.58154	3.18762	1.85919
80	PANI	Training	Aniline	[Ani]	0.0032	Ammonium persulfate	[APS]	0.0008	/	[/]	0	Hydrochloric acid	[HCl]	10	0.5	Water	[H2O]	2.7778	Tetrachloromethane	[CCl4]	0.1034	/	[/]	0		0	0	0	0	0	0	0	0	0	0	0	0	0.325003	1.67779	5.38893	8.67785	6.8445	4.7167	5.98338	4.99448	3.01391	3.58154	3.18762	1.85919
81	PANI	Training	Aniline	[Ani]	0.0032	Ammonium persulfate	[APS]	0.0008	/	[/]	0	Hydrochloric acid	[HCl]	10	0.5	Water	[H2O]	2.7778	Tetrachloromethane	[CCl4]	0.1034	/	[/]	0		0	0	0	0	0	0	0	0	0	0	0	0	0.325003	1.67779	5.38893	8.67785	6.8445	4.7167	5.98338	4.99448	3.01391	3.58154	3.18762	1.85919
82	PANI	Training	Aniline	[Ani]	0.0032	Ammonium persulfate	[APS]	0.0008	/	[/]	0	Hydrochloric acid	[HCl]	10	0.5	Water	[H2O]	2.7778	Tetrachloromethane	[CCl4]	0.1034	/	[/]	0		0	0	0	0	0	0	0	0	0	0	0	0	0.325003	1.67779	5.38893	8.67785	6.8445	4.7167	5.98338	4.99448	3.01391	3.58154	3.18762	1.85919
83	PANI	Training	Aniline	[Ani]	0.0032	Ammonium persulfate	[APS]	0.0008	/	[/]	0	Hydrochloric acid	[HCl]	10	0.5	Water	[H2O]	2.7778	Tetrachloromethane	[CCl4]	0.1034	/	[/]	0		0	0	0	0	0	0	0	0	0	0	0	0	0.325003	1.67779	5.38893	8.67785	6.8445	4.7167	5.98338	4.99448	3.01391	3.58154	3.18762	1.85919
84	PANI	Training	Aniline	[Ani]	0.0032	Ammonium persulfate	[APS]	0.0008	/	[/]	0	Hydrochloric acid	[HCl]	10	0.5	Water	[H2O]	2.7778	Tetrachloromethane	[CCl4]	0.1034	/	[/]	0		0	0	0	0	0	0	0	0	0	0	0	0	0.325003	1.67779	5.38893	8.67785	6.8445	4.7167	5.98338	4.99448	3.01391	3.58154	3.18762	1.85919
85	PANI	Training	Aniline	[Ani]	0.0032	Ammonium persulfate	[APS]	0.0008	/	[/]	0	Hydrochloric acid	[HCl]	10	1	Water	[H2O]	2.7778	Tetrachloromethane	[CCl4]	0.1034	/	[/]	0		0	0	0	0	0	0	0	0	0	0	0	0	0.325003	1.67779	5.38893	8.67785	6.8445	4.7167	5.98338	4.99448	3.01391	3.58154	3.18762	1.85919
86	PANI	Training	Aniline	[Ani]	0.0032	Ammonium persulfate	[APS]	0.0008	/	[/]	0	Hydrochloric acid	[HCl]	10	1	Water	[H2O]	2.7778	Tetrachloromethane	[CCl4]	0.1034	/	[/]	0		0	0	0	0	0	0	0	0	0	0	0	0	0.325003	1.67779	5.38893	8.67785	6.8445	4.7167	5.98338	4.99448	3.01391	3.58154	3.18762	1.85919
87	PANI	Training	Aniline	[Ani]	0.0032	Ammonium persulfate	[APS]	0.0008	/	[/]	0	Hydrochloric acid	[HCl]	10	1	Water	[H2O]	2.7778	Tetrachloromethane	[CCl4]	0.1034	/	[/]	0		0	0	0	0	0	0	0	0	0	0	0	0	0.325003	1.67779	5.38893	8.67785	6.8445	4.7167	5.98338	4.99448	3.01391	3.58154	3.18762	1.85919
88	PANI	Training	Aniline	[Ani]	0.0032	Ammonium persulfate	[APS]	0.0008	/	[/]	0	Hydrochloric acid	[HCl]	10	1	Water	[H2O]	2.7778	Tetrachloromethane	[CCl4]	0.1034	/	[/]	0		0	0	0	0	0	0	0	0	0	0	0	0	0.325003	1.67779	5.38893	8.67785	6.8445	4.7167	5.98338	4.99448	3.01391	3.58154	3.18762	1.85919
89	PANI	Training	Aniline	[Ani]	0.0032	Ammonium persulfate	[APS]	0.0008	/	[/]	0	Hydrochloric acid	[HCl]	10	1	Water	[H2O]	2.7778	Tetrachloromethane	[CCl4]	0.1034	/	[/]	0		0	0	0	0	0	0	0	0	0	0	0	0	0.325003	1.67779	5.38893	8.67785	6.8445	4.7167	5.98338	4.99448	3.01391	3.58154	3.18762	1.85919
90	PANI	Training	Aniline	[Ani]	0.0032	Ammonium persulfate	[APS]	0.0008	/	[/]	0	Hydrochloric acid	[HCl]	10	1	Water	[H2O]	2.7778	Tetrachloromethane	[CCl4]	0.1034	/	[/]	0		0	0	0	0	0	0	0	0	0	0	0	0	0.325003	1.67779	5.38893	8.67785	6.8445	4.7167	5.98338	4.99448	3.01391	3.58154	3.18762	1.85919
91	PANI	Training	Aniline	[Ani]	0.0032	Ammonium persulfate	[APS]	0.0008	/	[/]	0	Hydrochloric acid	[HCl]	10	1	Water	[H2O]	2.7778	Tetrachloromethane	[CCl4]	0.1034	/	[/]	0		0	0	0	0	0	0	0	0	0	0	0	0	0.325003	1.67779	5.38893	8.67785	6.8445	4.7167	5.98338	4.99448	3.01391	3.58154	3.18762	1.85919
92	PANI	Training	Aniline	[Ani]	0.0032	Ammonium persulfate	[APS]	0.0008	/	[/]	0	Hydrochloric acid	[HCl]	10	1	Water	[H2O]	2.7778	Tetrachloromethane	[CCl4]	0.1034	/	[/]	0		0	0	0	0	0	0	0	0	0	0	0	0	0.325003	1.67779	5.38893	8.67785	6.8445	4.7167	5.98338	4.99448	3.01391	3.58154	3.18762	1.85919
93	PANI	Training	Aniline	[Ani]	0.0032	Ammonium persulfate	[APS]	0.0008	/	[/]	0	Hydrochloric acid	[HCl]	10	1	Water	[H2O]	2.7778	Tetrachloromethane	[CCl4]	0.1034	/	[/]	0		0	0	0	0	0	0	0	0	0	0	0	0	0.325003	1.67779	5.38893	8.67785	6.8445	4.7167	5.98338	4.99448	3.01391	3.58154	3.18762	1.85919
94	PANI	Training	Aniline	[Ani]	0.0032	Ammonium persulfate	[APS]	0.0008	/	[/]	0	Hydrochloric acid	[HCl]	10	2	Water	[H2O]	2.7778	Tetrachloromethane	[CCl4]	0.1034	/	[/]	0		0	0	0	0	0	0	0	0	0	0	0	0	0.325003	1.67779	5.38893	8.67785	6.8445	4.7167	5.98338	4.99448	3.01391	3.58154	3.18762	1.85919
95	PANI	Test	Aniline	[Ani]	0.0032	Ammonium persulfate	[APS]	0.0008	/	[/]	0	Hydrochloric acid	[HCl]	10	2	Water	[H2O]	2.7778	Tetrachloromethane	[CCl4]	0.1034	/	[/]	0		0	0	0	0	0	0	0	0	0	0	0	0	0.325003	1.67779	5.38893	8.67785	6.8445	4.7167	5.98338	4.99448	3.01391	3.58154	3.18762	1.85919
96	PANI	Training	Aniline	[Ani]	0.0032	Ammonium persulfate	[APS]	0.0008	/	[/]	0	Hydrochloric acid	[HCl]	10	2	Water	[H2O]	2.7778	Tetrachloromethane	[CCl4]	0.1034	/	[/]	0		0	0	0	0	0	0	0	0	0	0	0	0	0.325003	1.67779	5.38893	8.67785	6.8445	4.7167	5.98338	4.99448	3.01391	3.58154	3.18762	1.85919
97	PANI	Test	Aniline	[Ani]	0.0032	Ammonium persulfate	[APS]	0.0008	/	[/]	0	Hydrochloric acid	[HCl]	10	2	Water	[H2O]	2.7778	Tetrachloromethane	[CCl4]	0.1034	/	[/]	0		0	0	0	0	0	0	0	0	0	0	0	0	0.325003	1.67779	5.38893	8.67785	6.8445	4.7167	5.98338	4.99448	3.01391	3.58154	3.18762	1.85919
98	PANI	Training	Aniline	[Ani]	0.0032	Ammonium persulfate	[APS]	0.0008	/	[/]	0	Hydrochloric acid	[HCl]	10	2	Water	[H2O]	2.7778	Tetrachloromethane	[CCl4]	0.1034	/	[/]	0		0	0	0	0	0	0	0	0	0	0	0	0	0.325003	1.67779	5.38893	8.67785	6.8445	4.7167	5.98338	4.99448	3.01391	3.58154	3.18762	1.85919
99	PANI	Training	Aniline	[Ani]	0.0055	Ammonium persulfate	[APS]	0.0025	/	[/]	0	Hydrochloric acid	[HCl]	102	1	Xylene	[SMO]	0.2035	Sorbitan monooleate	[C₈H₁₀]	0.0058	/	[/]	0		0	0	0	0	0	0	0	0	0.035002	0.108059	0.2326	0.422262	0.557793	0.607447	0.564509	0.479853	0.426943	0.369556	0.396011	0.428164	0.41514	0.474562	0.673333	1.40944
100	PANI/GO	Training	Aniline	[Ani]	0.0055	Ammonium persulfate	[APS]	0.0025	Graphene oxide	[GO]	10	Hydrochloric acid	[HCl]	102	1	Xylene	[SMO]	0.2035	Sorbitan monooleate	[C₈H₁₀]	0.0058	/	[/]	0		0	0	0	0	0	0	0	0	0.035002	0.108059	0.2326	0.422262	0.557793	0.607447	0.564509	0.479853	0.426943	0.369556	0.396011	0.428164	0.41514	0.474562	0.673333	1.40944
101	PANI/GO	Training	Aniline	[Ani]	0.0055	Ammonium persulfate	[APS]	0.0025	Graphene oxide	[GO]	30	Hydrochloric acid	[HCl]	102	1	Xylene	[SMO]	0.2035	Sorbitan monooleate	[C₈H₁₀]	0.0058	/	[/]	0		0	0	0	0	0	0	0	0	0.035002	0.108059	0.2326	0.422262	0.557793	0.607447	0.564509	0.479853	0.426943	0.369556	0.396011	0.428164	0.41514	0.474562	0.673333	1.40944
102	PANI/GO	Training	Aniline	[Ani]	0.0055	Ammonium persulfate	[APS]	0.0025	Graphene oxide	[GO]	50	Hydrochloric acid	[HCl]	102	1	Xylene	[SMO]	0.2035	Sorbitan monooleate	[C₈H₁₀]	0.0058	/	[/]	0		0	0	0	0	0	0	0	0	0.035002	0.108059	0.2326	0.422262	0.557793	0.607447	0.564509	0.479853	0.426943	0.369556	0.396011	0.428164	0.41514	0.474562	0.673333	1.40944
103	PANI/GO/ZnO	Test	Aniline	[Ani]	0.0055	Ammonium persulfate	[APS]	0.0025	Graphene oxide	[GO]	50	Hydrochloric acid	[HCl]	102	1	Xylene	[SMO]	0.2035	Sorbitan monooleate	[C₈H₁₀]	0.0058	Zinc oxide	[ZnO]	0.0027		0	0	0	0	0	0	0	0	0.035002	0.108059	0.232978	0.424935	0.564471	0.616852	0.574045	0.488353	0.436212	0.378488	0.403512	0.436018	0.421361	0.480661	0.679441	1.41179
104	PANI/GO/ZnO	Test	Aniline	[Ani]	0.0055	Ammonium persulfate	[APS]	0.0025	Graphene oxide	[GO]	50	Hydrochloric acid	[HCl]	102	1	Xylene	[SMO]	0.2035	Sorbitan monooleate	[C₈H₁₀]	0.0058	Zinc oxide	[ZnO]	0.0027		0	0	0	0	0	0	0	0	0.035002	0.108059	0.232978	0.424935	0.564471	0.616852	0.574045	0.488353	0.436212	0.378488	0.403512	0.436018	0.421361	0.480661	0.679441	1.41179
105	PANI/GO/ZnO	Training	Aniline	[Ani]	0.0055	Ammonium persulfate	[APS]	0.0025	Graphene oxide	[GO]	50	Hydrochloric acid	[HCl]	102	1	Xylene	[SMO]	0.2035	Sorbitan monooleate	[C₈H₁₀]	0.0058	Zinc oxide	[ZnO]	0.0027		0	0	0	0	0	0	0	0	0.035002	0.108059	0.232978	0.424935	0.564471	0.616852	0.574045	0.488353	0.436212	0.378488	0.403512	0.436018	0.421361	0.480661	0.679441	1.41179
106	PANI/GO/ZnO	Training	Aniline	[Ani]	0.0055	Ammonium persulfate	[APS]	0.0025	Graphene oxide	[GO]	50	Hydrochloric acid	[HCl]	102	1	Xylene	[SMO]	0.2035	Sorbitan monooleate	[C₈H₁₀]	0.0058	Zinc oxide	[ZnO]	0.0027		0	0	0	0	0	0	0	0	0.035002	0.108059	0.232978	0.424935	0.564471	0.616852	0.574045	0.488353	0.436212	0.378488	0.403512	0.436018	0.421361	0.480661	0.679441	1.41179
107	PANI/GO/ZnO	Training	Aniline	[Ani]	0.0055	Ammonium persulfate	[APS]	0.0025	Graphene oxide	[GO]	50	Hydrochloric acid	[HCl]	102	1	Xylene	[SMO]	0.2035	Sorbitan monooleate	[C₈H₁₀]	0.0058	Zinc oxide	[ZnO]	0.0027		0	0	0	0	0	0	0	0	0.035002	0.108059	0.232978	0.424935	0.564471	0.616852	0.574045	0.488353	0.436212	0.378488	0.403512	0.436018	0.421361	0.480661	0.679441	1.41179
108	PANI/GO/ZnO	Training	Aniline	[Ani]	0.0055	Ammonium persulfate	[APS]	0.0025	Graphene oxide	[GO]	50	Hydrochloric acid	[HCl]	102	1	Xylene	[SMO]	0.2035	Sorbitan monooleate	[C₈H₁₀]	0.0058	Zinc oxide	[ZnO]	0.0027		0	0	0	0	0	0	0	0	0.035002	0.108059	0.232978	0.424935	0.564471	0.616852	0.574045	0.488353	0.436212	0.378488	0.403512	0.436018	0.421361	0.480661	0.679441	1.41179
109	PANI/GO/ZnO	Training	Aniline	[Ani]	0.0055	Ammonium persulfate	[APS]	0.0025	Graphene oxide	[GO]	50	Hydrochloric acid	[HCl]	102	1	Xylene	[SMO]	0.2035	Sorbitan monooleate	[C₈H₁₀]	0.0058	Zinc oxide	[ZnO]	0.0027		0	0	0	0	0	0	0	0	0.035002	0.108059	0.232978	0.424935	0.564471	0.616852	0.574045	0.488353	0.436212	0.378488	0.403512	0.436018	0.421361	0.480661	0.679441	1.41179
110	PANI/GO/ZnO	Training	Aniline	[Ani]	0.0055	Ammonium persulfate	[APS]	0.0025	Graphene oxide	[GO]	50	Hydrochloric acid	[HCl]	102	1	Xylene	[SMO]	0.2035	Sorbitan monooleate	[C₈H₁₀]	0.0058	Zinc oxide	[ZnO]	0.0027		0	0	0	0	0	0	0	0	0.035002	0.108059	0.232978	0.424935	0.564471	0.616852	0.574045	0.488353	0.436212	0.378488	0.403512	0.436018	0.421361	0.480661	0.679441	1.41179
111	PANI/GO/ZnO	Training	Aniline	[Ani]	0.0055	Ammonium persulfate	[APS]	0.0025	Graphene oxide	[GO]	50	Hydrochloric acid	[HCl]	102	1	Xylene	[SMO]	0.2035	Sorbitan monooleate	[C₈H₁₀]	0.0058	Zinc oxide	[ZnO]	0.0027		0	0	0	0	0	0	0	0	0.035002	0.108059	0.232978	0.424935	0.564471	0.616852	0.574045	0.488353	0.436212	0.378488	0.403512	0.436018	0.421361	0.480661	0.679441	1.41179
112	PANI/GO/ZnO	Training	Aniline	[Ani]	0.0055	Ammonium persulfate	[APS]	0.0025	Graphene oxide	[GO]	50	Hydrochloric acid	[HCl]	102	1	Xylene	[SMO]	0.2035	Sorbitan monooleate	[C₈H₁₀]	0.0058	Zinc oxide	[ZnO]	0.0027		0	0	0	0	0	0	0	0	0.035002	0.108059	0.232978	0.424935	0.564471	0.616852	0.574045	0.488353	0.436212	0.378488	0.403512	0.436018	0.421361	0.480661	0.679441	1.41179
113	PANI/GO/ZnO	Test	Aniline	[Ani]	0.0055	Ammonium persulfate	[APS]	0.0025	Graphene oxide	[GO]	50	Hydrochloric acid	[HCl]	102	1	Xylene	[SMO]	0.2035	Sorbitan monooleate	[C₈H₁₀]	0.0058	Zinc oxide	[ZnO]	0.0027		0	0	0	0	0	0	0	0	0.035002	0.108059	0.232978	0.424935	0.564471	0.616852	0.574045	0.488353	0.436212	0.378488	0.403512	0.436018	0.421361	0.480661	0.679441	1.41179
114	PANI/GO/ZnO	Test	Aniline	[Ani]	0.0055	Ammonium persulfate	[APS]	0.0025	Graphene oxide	[GO]	50	Hydrochloric acid	[HCl]	102	1	Xylene	[SMO]	0.2035	Sorbitan monooleate	[C₈H₁₀]	0.0058	Zinc oxide	[ZnO]	0.0027		0	0	0	0	0	0	0	0	0.035002	0.108059	0.232978	0.424935	0.564471	0.616852	0.574045	0.488353	0.436212	0.378488	0.403512	0.436018	0.421361	0.480661	0.679441	1.41179
115	PANI/GO/ZnO	Training	Aniline	[Ani]	0.0055	Ammonium persulfate	[APS]	0.0025	Graphene oxide	[GO]	50	Hydrochloric acid	[HCl]	102	1	Xylene	[SMO]	0.2035	Sorbitan monooleate	[C₈H₁₀]	0.0058	Zinc oxide	[ZnO]	0.0027		0	0	0	0	0	0	0	0	0.035002	0.108059	0.232978	0.424935	0.564471	0.616852	0.574045	0.488353	0.436212	0.378488	0.403512	0.436018	0.421361	0.480661	0.679441	1.41179
116	PANI/GO/ZnO	Training	Aniline	[Ani]	0.0055	Ammonium persulfate	[APS]	0.0025	Graphene oxide	[GO]	50	Hydrochloric acid	[HCl]	102	1	Xylene	[SMO]	0.2035	Sorbitan monooleate	[C₈H₁₀]	0.0058	Zinc oxide	[ZnO]	0.0027		0	0	0	0	0	0	0	0	0.035002	0.108059	0.232978	0.424935	0.564471	0.616852	0.574045	0.488353	0.436212	0.378488	0.403512	0.436018	0.421361	0.480661	0.679441	1.41179
117	PANI/GO/ZnO	Training	Aniline	[Ani]	0.0055	Ammonium persulfate	[APS]	0.0025	Graphene oxide	[GO]	50	Hydrochloric acid	[HCl]	102	1	Xylene	[SMO]	0.2035	Sorbitan monooleate	[C₈H₁₀]	0.0058	Zinc oxide	[ZnO]	0.0027		0	0	0	0	0	0	0	0	0.035002	0.108059	0.232978	0.424935	0.564471	0.616852	0.574045	0.488353	0.436212	0.378488	0.403512	0.436018	0.421361	0.480661	0.679441	1.41179
118	PANI/GO/ZnO	Training	Aniline	[Ani]	0.0055	Ammonium persulfate	[APS]	0.0025	Graphene oxide	[GO]	50	Hydrochloric acid	[HCl]	102	1	Xylene	[SMO]	0.2035	Sorbitan monooleate	[C₈H₁₀]	0.0058	Zinc oxide	[ZnO]	0.0027		0	0	0	0	0	0	0	0	0.035002	0.108059	0.232978	0.424935	0.564471	0.616852	0.574045	0.488353	0.436212	0.378488	0.403512	0.436018	0.421361	0.480661	0.679441	1.41179
119	PANI/GO/ZnO	Training	Aniline	[Ani]	0.0055	Ammonium persulfate	[APS]	0.0025	Graphene oxide	[GO]	50	Hydrochloric acid	[HCl]	102	1	Xylene	[SMO]	0.2035	Sorbitan monooleate	[C₈H₁₀]	0.0058	Zinc oxide	[ZnO]	0.0027		0	0	0	0	0	0	0	0	0.035002	0.108059	0.232978	0.424935	0.564471	0.616852	0.574045	0.488353	0.436212	0.378488	0.403512	0.436018	0.421361	0.480661	0.679441	1.41179
120	PANI	Training	Aniline	[Ani]	0.0055	Ammonium persulfate	[APS]	0.0025	/	[/]	0	Hydrochloric acid	[HCl]	102	1	Xylene	[SMO]	0.2035	Sorbitan monooleate	[C₈H₁₀]	0.0058	/	[/]	0		0	0	0	0	0	0	0	0	0.035002	0.108059	0.2326	0.422262	0.557793	0.607447	0.564509	0.479853	0.426943	0.369556	0.396011	0.428164	0.41514	0.474562	0.673333	1.40944
121	PANI	Training	Aniline	[Ani]	0.0055	Ammonium persulfate	[APS]	0.0025	/	[/]	0	Hydrochloric acid	[HCl]	102	1	Xylene	[SMO]	0.2035	Sorbitan monooleate	[C₈H₁₀]	0.0058	/	[/]	0		0	0	0	0	0	0	0	0	0.035002	0.108059	0.2326	0.422262	0.557793	0.607447	0.564509	0.479853	0.426943	0.369556	0.396011	0.428164	0.41514	0.474562	0.673333	1.40944
122	PANI	Test	Aniline	[Ani]	0.0055	Ammonium persulfate	[APS]	0.0025	/	[/]	0	Hydrochloric acid	[HCl]	102	1	Xylene	[SMO]	0.2035	Sorbitan monooleate	[C₈H₁₀]	0.0058	/	[/]	0		0	0	0	0	0	0	0	0	0.035002	0.108059	0.2326	0.422262	0.557793	0.607447	0.564509	0.479853	0.426943	0.369556	0.396011	0.428164	0.41514	0.474562	0.673333	1.40944
123	PANI	Training	Aniline	[Ani]	0.0055	Ammonium persulfate	[APS]	0.0025	/	[/]	0	Hydrochloric acid	[HCl]	102	1	Xylene	[SMO]	0.2035	Sorbitan monooleate	[C₈H₁₀]	0.0058	/	[/]	0		0	0	0	0	0	0	0	0	0.035002	0.108059	0.2326	0.422262	0.557793	0.607447	0.564509	0.479853	0.426943	0.369556	0.396011	0.428164	0.41514	0.474562	0.673333	1.40944
124	PANI	Training	Aniline	[Ani]	0.0055	Ammonium persulfate	[APS]	0.0025	/	[/]	0	Hydrochloric acid	[HCl]	102	1	Xylene	[SMO]	0.2035	Sorbitan monooleate	[C₈H₁₀]	0.0058	/	[/]	0		0	0	0	0	0	0	0	0	0.035002	0.108059	0.2326	0.422262	0.557793	0.607447	0.564509	0.479853	0.426943	0.369556	0.396011	0.428164	0.41514	0.474562	0.673333	1.40944
125	PANI	Training	Aniline	[Ani]	0.0055	Ammonium persulfate	[APS]	0.0025	/	[/]	0	Hydrochloric acid	[HCl]	102	1	Xylene	[SMO]	0.2035	Sorbitan monooleate	[C₈H₁₀]	0.0058	/	[/]	0		0	0	0	0	0	0	0	0	0.035002	0.108059	0.2326	0.422262	0.557793	0.607447	0.564509	0.479853	0.426943	0.369556	0.396011	0.428164	0.41514	0.474562	0.673333	1.40944
126	PANI/GO	Training	Aniline	[Ani]	0.0055	Ammonium persulfate	[APS]	0.0025	Graphene oxide	[GO]	10	Hydrochloric acid	[HCl]	102	1	Xylene	[SMO]	0.2035	Sorbitan monooleate	[C₈H₁₀]	0.0058	/	[/]	0		0	0	0	0	0	0	0	0	0.035002	0.108059	0.2326	0.422262	0.557793	0.607447	0.564509	0.479853	0.426943	0.369556	0.396011	0.428164	0.41514	0.474562	0.673333	1.40944
127	PANI/GO	Training	Aniline	[Ani]	0.0055	Ammonium persulfate	[APS]	0.0025	Graphene oxide	[GO]	10	Hydrochloric acid	[HCl]	102	1	Xylene	[SMO]	0.2035	Sorbitan monooleate	[C₈H₁₀]	0.0058	/	[/]	0		0	0	0	0	0	0	0	0	0.035002	0.108059	0.2326	0.422262	0.557793	0.607447	0.564509	0.479853	0.426943	0.369556	0.396011	0.428164	0.41514	0.474562	0.673333	1.40944
128	PANI/GO	Training	Aniline	[Ani]	0.0055	Ammonium persulfate	[APS]	0.0025	Graphene oxide	[GO]	10	Hydrochloric acid	[HCl]	102	1	Xylene	[SMO]	0.2035	Sorbitan monooleate	[C₈H₁₀]	0.0058	/	[/]	0		0	0	0	0	0	0	0	0	0.035002	0.108059	0.2326	0.422262	0.557793	0.607447	0.564509	0.479853	0.426943	0.369556	0.396011	0.428164	0.41514	0.474562	0.673333	1.40944
129	PANI/GO	Training	Aniline	[Ani]	0.0055	Ammonium persulfate	[APS]	0.0025	Graphene oxide	[GO]	10	Hydrochloric acid	[HCl]	102	1	Xylene	[SMO]	0.2035	Sorbitan monooleate	[C₈H₁₀]	0.0058	/	[/]	0		0	0	0	0	0	0	0	0	0.035002	0.108059	0.2326	0.422262	0.557793	0.607447	0.564509	0.479853	0.426943	0.369556	0.396011	0.428164	0.41514	0.474562	0.673333	1.40944
130	PANI/GO	Training	Aniline	[Ani]	0.0055	Ammonium persulfate	[APS]	0.0025	Graphene oxide	[GO]	10	Hydrochloric acid	[HCl]	102	1	Xylene	[SMO]	0.2035	Sorbitan monooleate	[C₈H₁₀]	0.0058	/	[/]	0		0	0	0	0	0	0	0	0	0.035002	0.108059	0.2326	0.422262	0.557793	0.607447	0.564509	0.479853	0.426943	0.369556	0.396011	0.428164	0.41514	0.474562	0.673333	1.40944
131	PANI/GO	Training	Aniline	[Ani]	0.0055	Ammonium persulfate	[APS]	0.0025	Graphene oxide	[GO]	30	Hydrochloric acid	[HCl]	102	1	Xylene	[SMO]	0.2035	Sorbitan monooleate	[C₈H₁₀]	0.0058	/	[/]	0		0	0	0	0	0	0	0	0	0.035002	0.108059	0.2326	0.422262	0.557793	0.607447	0.564509	0.479853	0.426943	0.369556	0.396011	0.428164	0.41514	0.474562	0.673333	1.40944
132	PANI/GO	Training	Aniline	[Ani]	0.0055	Ammonium persulfate	[APS]	0.0025	Graphene oxide	[GO]	30	Hydrochloric acid	[HCl]	102	1	Xylene	[SMO]	0.2035	Sorbitan monooleate	[C₈H₁₀]	0.0058	/	[/]	0		0	0	0	0	0	0	0	0	0.035002	0.108059	0.2326	0.422262	0.557793	0.607447	0.564509	0.479853	0.426943	0.369556	0.396011	0.428164	0.41514	0.474562	0.673333	1.40944
133	PANI/GO	Training	Aniline	[Ani]	0.0055	Ammonium persulfate	[APS]	0.0025	Graphene oxide	[GO]	30	Hydrochloric acid	[HCl]	102	1	Xylene	[SMO]	0.2035	Sorbitan monooleate	[C₈H₁₀]	0.0058	/	[/]	0		0	0	0	0	0	0	0	0	0.035002	0.108059	0.2326	0.422262	0.557793	0.607447	0.564509	0.479853	0.426943	0.369556	0.396011	0.428164	0.41514	0.474562	0.673333	1.40944
134	PANI/GO	Training	Aniline	[Ani]	0.0055	Ammonium persulfate	[APS]	0.0025	Graphene oxide	[GO]	30	Hydrochloric acid	[HCl]	102	1	Xylene	[SMO]	0.2035	Sorbitan monooleate	[C₈H₁₀]	0.0058	/	[/]	0		0	0	0	0	0	0	0	0	0.035002	0.108059	0.2326	0.422262	0.557793	0.607447	0.564509	0.479853	0.426943	0.369556	0.396011	0.428164	0.41514	0.474562	0.673333	1.40944
135	PANI/GO	Test	Aniline	[Ani]	0.0055	Ammonium persulfate	[APS]	0.0025	Graphene oxide	[GO]	30	Hydrochloric acid	[HCl]	102	1	Xylene	[SMO]	0.2035	Sorbitan monooleate	[C₈H₁₀]	0.0058	/	[/]	0		0	0	0	0	0	0	0	0	0.035002	0.108059	0.2326	0.422262	0.557793	0.607447	0.564509	0.479853	0.426943	0.369556	0.396011	0.428164	0.41514	0.474562	0.673333	1.40944
136	PANI/GO	Test	Aniline	[Ani]	0.0055	Ammonium persulfate	[APS]	0.0025	Graphene oxide	[GO]	50	Hydrochloric acid	[HCl]	102	1	Xylene	[SMO]	0.2035	Sorbitan monooleate	[C₈H₁₀]	0.0058	/	[/]	0		0	0	0	0	0	0	0	0	0.035002	0.108059	0.2326	0.422262	0.557793	0.607447	0.564509	0.479853	0.426943	0.369556	0.396011	0.428164	0.41514	0.474562	0.673333	1.40944
137	PANI/GO	Test	Aniline	[Ani]	0.0055	Ammonium persulfate	[APS]	0.0025	Graphene oxide	[GO]	50	Hydrochloric acid	[HCl]	102	1	Xylene	[SMO]	0.2035	Sorbitan monooleate	[C₈H₁₀]	0.0058	/	[/]	0		0	0	0	0	0	0	0	0	0.035002	0.108059	0.2326	0.422262	0.557793	0.607447	0.564509	0.479853	0.426943	0.369556	0.396011	0.428164	0.41514	0.474562	0.673333	1.40944
138	PANI/GO	Training	Aniline	[Ani]	0.0055	Ammonium persulfate	[APS]	0.0025	Graphene oxide	[GO]	50	Hydrochloric acid	[HCl]	102	1	Xylene	[SMO]	0.2035	Sorbitan monooleate	[C₈H₁₀]	0.0058	/	[/]	0		0	0	0	0	0	0	0	0	0.035002	0.108059	0.2326	0.422262	0.557793	0.607447	0.564509	0.479853	0.426943	0.369556	0.396011	0.428164	0.41514	0.474562	0.673333	1.40944
139	PANI/GO	Training	Aniline	[Ani]	0.0055	Ammonium persulfate	[APS]	0.0025	Graphene oxide	[GO]	50	Hydrochloric acid	[HCl]	102	1	Xylene	[SMO]	0.2035	Sorbitan monooleate	[C₈H₁₀]	0.0058	/	[/]	0		0	0	0	0	0	0	0	0	0.035002	0.108059	0.2326	0.422262	0.557793	0.607447	0.564509	0.479853	0.426943	0.369556	0.396011	0.428164	0.41514	0.474562	0.673333	1.40944
140	PANI/GO	Training	Aniline	[Ani]	0.0055	Ammonium persulfate	[APS]	0.0025	Graphene oxide	[GO]	50	Hydrochloric acid	[HCl]	102	1	Xylene	[SMO]	0.2035	Sorbitan monooleate	[C₈H₁₀]	0.0058	/	[/]	0		0	0	0	0	0	0	0	0	0.035002	0.108059	0.2326	0.422262	0.557793	0.607447	0.564509	0.479853	0.426943	0.369556	0.396011	0.428164	0.41514	0.474562	0.673333	1.40944
141	PANI	Training	Aniline	[Ani]	0.0055	Ammonium persulfate	[APS]	0.0025	/	[/]	0	Hydrochloric acid	[HCl]	102	1	Xylene	[SMO]	0.2035	Sorbitan monooleate	[C₈H₁₀]	0.0058	/	[/]	0		0	0	0	0	0	0	0	0	0.035002	0.108059	0.2326	0.422262	0.557793	0.607447	0.564509	0.479853	0.426943	0.369556	0.396011	0.428164	0.41514	0.474562	0.673333	1.40944
142	PANI	Training	Aniline	[Ani]	0.0055	Ammonium persulfate	[APS]	0.0025	/	[/]	0	Hydrochloric acid	[HCl]	102	1	Xylene	[SMO]	0.2035	Sorbitan monooleate	[C₈H₁₀]	0.0058	/	[/]	0		0	0	0	0	0	0	0	0	0.035002	0.108059	0.2326	0.422262	0.557793	0.607447	0.564509	0.479853	0.426943	0.369556	0.396011	0.428164	0.41514	0.474562	0.673333	1.40944
143	PANI	Training	Aniline	[Ani]	0.0055	Ammonium persulfate	[APS]	0.0025	/	[/]	0	Hydrochloric acid	[HCl]	102	1	Xylene	[SMO]	0.2035	Sorbitan monooleate	[C₈H₁₀]	0.0058	/	[/]	0		0	0	0	0	0	0	0	0	0.035002	0.108059	0.2326	0.422262	0.557793	0.607447	0.564509	0.479853	0.426943	0.369556	0.396011	0.428164	0.41514	0.474562	0.673333	1.40944
144	PANI	Test	Aniline	[Ani]	0.0055	Ammonium persulfate	[APS]	0.0025	/	[/]	0	Hydrochloric acid	[HCl]	102	1	Xylene	[SMO]	0.2035	Sorbitan monooleate	[C₈H₁₀]	0.0058	/	[/]	0		0	0	0	0	0	0	0	0	0.035002	0.108059	0.2326	0.422262	0.557793	0.607447	0.564509	0.479853	0.426943	0.369556	0.396011	0.428164	0.41514	0.474562	0.673333	1.40944
145	PANI	Training	Aniline	[Ani]	0.0055	Ammonium persulfate	[APS]	0.0025	/	[/]	0	Hydrochloric acid	[HCl]	102	1	Xylene	[SMO]	0.2035	Sorbitan monooleate	[C₈H₁₀]	0.0058	/	[/]	0		0	0	0	0	0	0	0	0	0.035002	0.108059	0.2326	0.422262	0.557793	0.607447	0.564509	0.479853	0.426943	0.369556	0.396011	0.428164	0.41514	0.474562	0.673333	1.40944
146	PANI	Training	Aniline	[Ani]	0.0055	Ammonium persulfate	[APS]	0.0025	/	[/]	0	Hydrochloric acid	[HCl]	102	1	Xylene	[SMO]	0.2035	Sorbitan monooleate	[C₈H₁₀]	0.0058	/	[/]	0		0	0	0	0	0	0	0	0	0.035002	0.108059	0.2326	0.422262	0.557793	0.607447	0.564509	0.479853	0.426943	0.369556	0.396011	0.428164	0.41514	0.474562	0.673333	1.40944
147	PANI	Training	Aniline	[Ani]	0.0055	Ammonium persulfate	[APS]	0.0025	/	[/]	0	Hydrochloric acid	[HCl]	102	1	Xylene	[SMO]	0.2035	Sorbitan monooleate	[C₈H₁₀]	0.0058	/	[/]	0		0	0	0	0	0	0	0	0	0.035002	0.108059	0.2326	0.422262	0.557793	0.607447	0.564509	0.479853	0.426943	0.369556	0.396011	0.428164	0.41514	0.474562	0.673333	1.40944
148	PANI	Training	Aniline	[Ani]	0.0055	Ammonium persulfate	[APS]	0.0025	/	[/]	0	Hydrochloric acid	[HCl]	102	1	Xylene	[SMO]	0.2035	Sorbitan monooleate	[C₈H₁₀]	0.0058	/	[/]	0		0	0	0	0	0	0	0	0	0.035002	0.108059	0.2326	0.422262	0.557793	0.607447	0.564509	0.479853	0.426943	0.369556	0.396011	0.428164	0.41514	0.474562	0.673333	1.40944
149	PANI	Training	Aniline	[Ani]	0.0055	Ammonium persulfate	[APS]	0.0025	/	[/]	0	Hydrochloric acid	[HCl]	102	1	Xylene	[SMO]	0.2035	Sorbitan monooleate	[C₈H₁₀]	0.0058	/	[/]	0		0	0	0	0	0	0	0	0	0.035002	0.108059	0.2326	0.422262	0.557793	0.607447	0.564509	0.479853	0.426943	0.369556	0.396011	0.428164	0.41514	0.474562	0.673333	1.40944
150	PANI	Test	Aniline	[Ani]	0.0055	Ammonium persulfate	[APS]	0.0025	/	[/]	0	Hydrochloric acid	[HCl]	102	1	Xylene	[SMO]	0.2035	Sorbitan monooleate	[C₈H₁₀]	0.0058	/	[/]	0		0	0	0	0	0	0	0	0	0.035002	0.108059	0.2326	0.422262	0.557793	0.607447	0.564509	0.479853	0.426943	0.369556	0.396011	0.428164	0.41514	0.474562	0.673333	1.40944
151	PANI	Test	Aniline	[Ani]	0.1	Ammonium persulfate	[APS]	0.1	/	[/]	0	Hydrochloric acid	[HCl]	100	1	/	[/]	0	/	[/]	0	/	[/]	0		0	0	0	0	0	0	0	0	0	0	0	0	0	0	0	0	0	0	0	0	0	0	0	0
152	PANI	Test	Aniline	[Ani]	0.1	Ammonium persulfate	[APS]	0.1	/	[/]	0	Hydrochloric acid	[HCl]	100	1	/	[/]	0	/	[/]	0	/	[/]	0		0	0	0	0	0	0	0	0	0	0	0	0	0	0	0	0	0	0	0	0	0	0	0	0
153	PANI	Training	Aniline	[Ani]	0.1	Ammonium persulfate	[APS]	0.1	/	[/]	0	Hydrochloric acid	[HCl]	100	1	/	[/]	0	/	[/]	0	/	[/]	0		0	0	0	0	0	0	0	0	0	0	0	0	0	0	0	0	0	0	0	0	0	0	0	0
154	PANI	Training	Aniline	[Ani]	0.1	Ammonium persulfate	[APS]	0.1	/	[/]	0	Hydrochloric acid	[HCl]	100	1	/	[/]	0	/	[/]	0	/	[/]	0		0	0	0	0	0	0	0	0	0	0	0	0	0	0	0	0	0	0	0	0	0	0	0	0
155	PANI	Training	Aniline	[Ani]	0.1	Ammonium persulfate	[APS]	0.1	/	[/]	0	Hydrochloric acid	[HCl]	100	1	/	[/]	0	/	[/]	0	/	[/]	0		0	0	0	0	0	0	0	0	0	0	0	0	0	0	0	0	0	0	0	0	0	0	0	0
156	PANI	Training	Aniline	[Ani]	0.1	Ammonium persulfate	[APS]	0.1	/	[/]	0	Hydrochloric acid	[HCl]	100	1	/	[/]	0	/	[/]	0	/	[/]	0		0	0	0	0	0	0	0	0	0	0	0	0	0	0	0	0	0	0	0	0	0	0	0	0
157	PANI	Training	Aniline	[Ani]	0.1	Ammonium persulfate	[APS]	0.1	/	[/]	0	Hydrochloric acid	[HCl]	100	1	/	[/]	0	/	[/]	0	/	[/]	0		0	0	0	0	0	0	0	0	0	0	0	0	0	0	0	0	0	0	0	0	0	0	0	0
158	PANI	Training	Aniline	[Ani]	0.1	Ammonium persulfate	[APS]	0.1	/	[/]	0	Hydrochloric acid	[HCl]	100	1	/	[/]	0	/	[/]	0	/	[/]	0		0	0	0	0	0	0	0	0	0	0	0	0	0	0	0	0	0	0	0	0	0	0	0	0
159	PANI	Test	Aniline	[Ani]	0.1	Ammonium persulfate	[APS]	0.1	/	[/]	0	Hydrochloric acid	[HCl]	100	1	/	[/]	0	/	[/]	0	/	[/]	0		0	0	0	0	0	0	0	0	0	0	0	0	0	0	0	0	0	0	0	0	0	0	0	0
160	PANI	Training	Aniline	[Ani]	0.1	Ammonium persulfate	[APS]	0.1	/	[/]	0	Hydrochloric acid	[HCl]	100	1	/	[/]	0	/	[/]	0	/	[/]	0		0	0	0	0	0	0	0	0	0	0	0	0	0	0	0	0	0	0	0	0	0	0	0	0
161	PANI	Training	Aniline	[Ani]	0.1	Ammonium persulfate	[APS]	0.1	/	[/]	0	Hydrochloric acid	[HCl]	100	1	/	[/]	0	/	[/]	0	/	[/]	0		0	0	0	0	0	0	0	0	0	0	0	0	0	0	0	0	0	0	0	0	0	0	0	0
162	PANI	Training	Aniline	[Ani]	0.1	Ammonium persulfate	[APS]	0.1	/	[/]	0	Hydrochloric acid	[HCl]	100	1	/	[/]	0	/	[/]	0	/	[/]	0		0	0	0	0	0	0	0	0	0	0	0	0	0	0	0	0	0	0	0	0	0	0	0	0
163	PANI/In2O3	Training	Aniline	[Ani]	0.1	Ammonium persulfate	[APS]	0.1	/	[/]	0	Hydrochloric acid	[HCl]	250	1.2	Indium oxide	[In2O3]	0.2	/	[/]	0	/	[/]	0		0	0	0	0	0	0	0	0	0	0.0258	0.2288	0.4586	0.452	0.5482	1.3282	2.127	1.9532	1.5044	1.1628	0.8304	0.848	0.7834	0.4562	0.5616
164	PANI/In2O3	Training	Aniline	[Ani]	0.1	Ammonium persulfate	[APS]	0.1	/	[/]	0	Hydrochloric acid	[HCl]	250	1.2	Indium oxide	[In2O3]	0.2	/	[/]	0	/	[/]	0		0	0	0	0	0	0	0	0	0	0.0258	0.2288	0.4586	0.452	0.5482	1.3282	2.127	1.9532	1.5044	1.1628	0.8304	0.848	0.7834	0.4562	0.5616
165	PANI/In2O3	Training	Aniline	[Ani]	0.1	Ammonium persulfate	[APS]	0.1	/	[/]	0	Hydrochloric acid	[HCl]	250	1.2	Indium oxide	[In2O3]	0.2	/	[/]	0	/	[/]	0		0	0	0	0	0	0	0	0	0	0.0258	0.2288	0.4586	0.452	0.5482	1.3282	2.127	1.9532	1.5044	1.1628	0.8304	0.848	0.7834	0.4562	0.5616
166	PANI/In2O3	Training	Aniline	[Ani]	0.1	Ammonium persulfate	[APS]	0.1	/	[/]	0	Hydrochloric acid	[HCl]	250	1.2	Indium oxide	[In2O3]	0.2	/	[/]	0	/	[/]	0		0	0	0	0	0	0	0	0	0	0.0258	0.2288	0.4586	0.452	0.5482	1.3282	2.127	1.9532	1.5044	1.1628	0.8304	0.848	0.7834	0.4562	0.5616
167	PANI/GO	Training	Aniline	[Ani]	0.0009	Ammonium persulfate	[APS]	0.0006	Graphene oxide	[GO]	2	Perchloric acid	[HClO4]	45	1	Water	[H2O]	0.833	/	[/]	0	/	[/]	0		0	0	0	0	0	0	0	0	0	0	0	0	0.097461	0.503132	1.61602	2.60229	2.05251	1.41443	1.79428	1.49773	0.903805	1.06624	0.928795	0.445655
168	PANI/GO	Training	Aniline	[Ani]	0.0009	Ammonium persulfate	[APS]	0.0006	Graphene oxide	[GO]	2	Perchloric acid	[HClO4]	45	1	Water	[H2O]	0.833	/	[/]	0	/	[/]	0		0	0	0	0	0	0	0	0	0	0	0	0	0.097461	0.503132	1.61602	2.60229	2.05251	1.41443	1.79428	1.49773	0.903805	1.06624	0.928795	0.445655
169	PANI/GO	Training	Aniline	[Ani]	0.0009	Ammonium persulfate	[APS]	0.0006	Graphene oxide	[GO]	2	Perchloric acid	[HClO4]	45	1	Water	[H2O]	0.833	/	[/]	0	/	[/]	0		0	0	0	0	0	0	0	0	0	0	0	0	0.097461	0.503132	1.61602	2.60229	2.05251	1.41443	1.79428	1.49773	0.903805	1.06624	0.928795	0.445655
170	PANI/GO	Training	Aniline	[Ani]	0.0009	Ammonium persulfate	[APS]	0.0006	Graphene oxide	[GO]	2	Perchloric acid	[HClO4]	45	1	Water	[H2O]	0.833	/	[/]	0	/	[/]	0		0	0	0	0	0	0	0	0	0	0	0	0	0.097461	0.503132	1.61602	2.60229	2.05251	1.41443	1.79428	1.49773	0.903805	1.06624	0.928795	0.445655
171	PANI/GO	Test	Aniline	[Ani]	0.0009	Ammonium persulfate	[APS]	0.0006	Graphene oxide	[GO]	2	Perchloric acid	[HClO4]	45	1	Water	[H2O]	0.833	/	[/]	0	/	[/]	0		0	0	0	0	0	0	0	0	0	0	0	0	0.097461	0.503132	1.61602	2.60229	2.05251	1.41443	1.79428	1.49773	0.903805	1.06624	0.928795	0.445655
172	PANI/GO	Training	Aniline	[Ani]	0.0009	Ammonium persulfate	[APS]	0.0006	Graphene oxide	[GO]	2	Perchloric acid	[HClO4]	45	1	Water	[H2O]	0.833	/	[/]	0	/	[/]	0		0	0	0	0	0	0	0	0	0	0	0	0	0.097461	0.503132	1.61602	2.60229	2.05251	1.41443	1.79428	1.49773	0.903805	1.06624	0.928795	0.445655
173	PANI/GO	Training	Aniline	[Ani]	0.0009	Ammonium persulfate	[APS]	0.0006	Graphene oxide	[GO]	2	Perchloric acid	[HClO4]	45	1	Water	[H2O]	0.833	/	[/]	0	/	[/]	0		0	0	0	0	0	0	0	0	0	0	0	0	0.097461	0.503132	1.61602	2.60229	2.05251	1.41443	1.79428	1.49773	0.903805	1.06624	0.928795	0.445655
174	PANI/GO	Training	Aniline	[Ani]	0.0009	Ammonium persulfate	[APS]	0.0006	Graphene oxide	[GO]	2	Perchloric acid	[HClO4]	45	1	Water	[H2O]	0.833	/	[/]	0	/	[/]	0		0	0	0	0	0	0	0	0	0	0	0	0	0.097461	0.503132	1.61602	2.60229	2.05251	1.41443	1.79428	1.49773	0.903805	1.06624	0.928795	0.445655
175	PANI/GO	Training	Aniline	[Ani]	0.0009	Ammonium persulfate	[APS]	0.0006	Graphene oxide	[GO]	2	Perchloric acid	[HClO4]	45	1	Water	[H2O]	0.833	/	[/]	0	/	[/]	0		0	0	0	0	0	0	0	0	0	0	0	0	0.097461	0.503132	1.61602	2.60229	2.05251	1.41443	1.79428	1.49773	0.903805	1.06624	0.928795	0.445655
176	PANI/GO	Training	Aniline	[Ani]	0.0009	Ammonium persulfate	[APS]	0.0006	Graphene oxide	[GO]	2	Perchloric acid	[HClO4]	45	1	Water	[H2O]	0.833	/	[/]	0	/	[/]	0		0	0	0	0	0	0	0	0	0	0	0	0	0.097461	0.503132	1.61602	2.60229	2.05251	1.41443	1.79428	1.49773	0.903805	1.06624	0.928795	0.445655
177	PANI/GO	Training	Aniline	[Ani]	0.0009	Ammonium persulfate	[APS]	0.0006	Graphene oxide	[GO]	2	Perchloric acid	[HClO4]	45	1	Water	[H2O]	0.833	/	[/]	0	/	[/]	0		0	0	0	0	0	0	0	0	0	0	0	0	0.097461	0.503132	1.61602	2.60229	2.05251	1.41443	1.79428	1.49773	0.903805	1.06624	0.928795	0.445655
178	PANI/GO	Training	Aniline	[Ani]	0.0009	Ammonium persulfate	[APS]	0.0006	Graphene oxide	[GO]	2	Perchloric acid	[HClO4]	45	1	Water	[H2O]	0.833	/	[/]	0	/	[/]	0		0	0	0	0	0	0	0	0	0	0	0	0	0.097461	0.503132	1.61602	2.60229	2.05251	1.41443	1.79428	1.49773	0.903805	1.06624	0.928795	0.445655
179	PANI/GO	Training	Aniline	[Ani]	0.0009	Ammonium persulfate	[APS]	0.0006	Graphene oxide	[GO]	2	Perchloric acid	[HClO4]	45	1	Water	[H2O]	0.833	/	[/]	0	/	[/]	0		0	0	0	0	0	0	0	0	0	0	0	0	0.097461	0.503132	1.61602	2.60229	2.05251	1.41443	1.79428	1.49773	0.903805	1.06624	0.928795	0.445655
180	PANI/GO	Training	Aniline	[Ani]	0.0009	Ammonium persulfate	[APS]	0.0006	Graphene oxide	[GO]	2	Perchloric acid	[HClO4]	45	1	Water	[H2O]	0.833	/	[/]	0	/	[/]	0		0	0	0	0	0	0	0	0	0	0	0	0	0.097461	0.503132	1.61602	2.60229	2.05251	1.41443	1.79428	1.49773	0.903805	1.06624	0.928795	0.445655
181	PANI/GO	Training	Aniline	[Ani]	0.0009	Ammonium persulfate	[APS]	0.0006	Graphene oxide	[GO]	2	Perchloric acid	[HClO4]	45	1	Water	[H2O]	0.833	/	[/]	0	/	[/]	0		0	0	0	0	0	0	0	0	0	0	0	0	0.097461	0.503132	1.61602	2.60229	2.05251	1.41443	1.79428	1.49773	0.903805	1.06624	0.928795	0.445655
182	PANI/GO	Training	Aniline	[Ani]	0.0009	Ammonium persulfate	[APS]	0.0006	Graphene oxide	[GO]	2	Perchloric acid	[HClO4]	45	1	Water	[H2O]	0.833	/	[/]	0	/	[/]	0		0	0	0	0	0	0	0	0	0	0	0	0	0.097461	0.503132	1.61602	2.60229	2.05251	1.41443	1.79428	1.49773	0.903805	1.06624	0.928795	0.445655
183	PANI/GO	Training	Aniline	[Ani]	0.0009	Ammonium persulfate	[APS]	0.0006	Graphene oxide	[GO]	2	Perchloric acid	[HClO4]	45	1	Water	[H2O]	0.833	/	[/]	0	/	[/]	0		0	0	0	0	0	0	0	0	0	0	0	0	0.097461	0.503132	1.61602	2.60229	2.05251	1.41443	1.79428	1.49773	0.903805	1.06624	0.928795	0.445655
184	PANI/GO	Training	Aniline	[Ani]	0.0009	Ammonium persulfate	[APS]	0.0006	Graphene oxide	[GO]	2	Perchloric acid	[HClO4]	45	1	Water	[H2O]	0.833	/	[/]	0	/	[/]	0		0	0	0	0	0	0	0	0	0	0	0	0	0.097461	0.503132	1.61602	2.60229	2.05251	1.41443	1.79428	1.49773	0.903805	1.06624	0.928795	0.445655
185	PANI	Training	Aniline	[Ani]	0.0002	Ammonium persulfate	[APS]	0.0002	/	[/]	0	Hydrochloric acid	[HCl]	50	1	/	[/]	0	/	[/]	0	/	[/]	0		0	0	0	0	0	0	0	0	0	0	0	0	0	0	0	0	0	0	0	0	0	0	0	0
186	PANI	Training	Aniline	[Ani]	0.0002	Ammonium persulfate	[APS]	0.0002	/	[/]	0	Hydrochloric acid	[HCl]	50	1	/	[/]	0	/	[/]	0	/	[/]	0		0	0	0	0	0	0	0	0	0	0	0	0	0	0	0	0	0	0	0	0	0	0	0	0
187	PANI	Training	Aniline	[Ani]	0.0002	Ammonium persulfate	[APS]	0.0002	/	[/]	0	Hydrochloric acid	[HCl]	50	1	/	[/]	0	/	[/]	0	/	[/]	0		0	0	0	0	0	0	0	0	0	0	0	0	0	0	0	0	0	0	0	0	0	0	0	0
188	PANI	Training	Aniline	[Ani]	0.0002	Ammonium persulfate	[APS]	0.0002	/	[/]	0	Hydrochloric acid	[HCl]	50	1	/	[/]	0	/	[/]	0	/	[/]	0		0	0	0	0	0	0	0	0	0	0	0	0	0	0	0	0	0	0	0	0	0	0	0	0
189	PANI	Training	Aniline	[Ani]	0.0002	Ammonium persulfate	[APS]	0.0002	/	[/]	0	Hydrochloric acid	[HCl]	50	1	/	[/]	0	/	[/]	0	/	[/]	0		0	0	0	0	0	0	0	0	0	0	0	0	0	0	0	0	0	0	0	0	0	0	0	0
190	PANI	Training	Aniline	[Ani]	0.0002	Ammonium persulfate	[APS]	0.0002	/	[/]	0	Hydrochloric acid	[HCl]	50	1	/	[/]	0	/	[/]	0	/	[/]	0		0	0	0	0	0	0	0	0	0	0	0	0	0	0	0	0	0	0	0	0	0	0	0	0
191	PANI	Training	Aniline	[Ani]	0.0002	Ammonium persulfate	[APS]	0.0002	/	[/]	0	Hydrochloric acid	[HCl]	50	1	/	[/]	0	/	[/]	0	/	[/]	0		0	0	0	0	0	0	0	0	0	0	0	0	0	0	0	0	0	0	0	0	0	0	0	0
192	PANI	Training	Aniline	[Ani]	0.0002	Ammonium persulfate	[APS]	0.0002	/	[/]	0	Hydrochloric acid	[HCl]	50	1	/	[/]	0	/	[/]	0	/	[/]	0		0	0	0	0	0	0	0	0	0	0	0	0	0	0	0	0	0	0	0	0	0	0	0	0
193	PANI/In2O3	Training	Aniline	[Ani]	0.0002	Ammonium persulfate	[APS]	0.0002	/	[/]	0	Hydrochloric acid	[HCl]	50	1	/	[/]	0	/	[/]	0	/	[/]	0		0	0	0	0	0	0	0	0	0	0	0	0	0	0	0	0	0	0	0	0	0	0	0	0
194	PANI/CeO2	Training	Aniline	[Ani]	0.0011	Ammonium persulfate	[APS]	0.0004	/	[/]	0	Hydrochloric acid	[HCl]	30	1	Cerium dioxide	[CeO2]	0.0042	/	[/]	0	/	[/]	0		0	0	0	0	0	0	0	0	0	0	0.0009408	0.0079254	0.0278418	0.03696	0.0173964	0.0042126	0.0145908	0.0204162	0.012915	0.0100632	0.0076188	0.0017262	0.001344	0.0069174
195	PANI	Test	Aniline	[Ani]	0.0011	Ammonium persulfate	[APS]	0.0004	/	[/]	0	Hydrochloric acid	[HCl]	30	1	/	[/]	0	/	[/]	0	/	[/]	0		0	0	0	0	0	0	0	0	0	0	0	0	0	0	0	0	0	0	0	0	0	0	0	0
196	PANI	Training	Aniline	[Ani]	0.0011	Ammonium persulfate	[APS]	0.0004	/	[/]	0	Hydrochloric acid	[HCl]	30	1	/	[/]	0	/	[/]	0	/	[/]	0		0	0	0	0	0	0	0	0	0	0	0	0	0	0	0	0	0	0	0	0	0	0	0	0
197	PANI	Training	Aniline	[Ani]	0.0011	Ammonium persulfate	[APS]	0.0004	/	[/]	0	Hydrochloric acid	[HCl]	30	1	/	[/]	0	/	[/]	0	/	[/]	0		0	0	0	0	0	0	0	0	0	0	0	0	0	0	0	0	0	0	0	0	0	0	0	0
198	PANI	Training	Aniline	[Ani]	0.0011	Ammonium persulfate	[APS]	0.0004	/	[/]	0	Hydrochloric acid	[HCl]	30	1	/	[/]	0	/	[/]	0	/	[/]	0		0	0	0	0	0	0	0	0	0	0	0	0	0	0	0	0	0	0	0	0	0	0	0	0
199	PANI	Test	Aniline	[Ani]	0.0011	Ammonium persulfate	[APS]	0.0004	/	[/]	0	Hydrochloric acid	[HCl]	30	1	/	[/]	0	/	[/]	0	/	[/]	0		0	0	0	0	0	0	0	0	0	0	0	0	0	0	0	0	0	0	0	0	0	0	0	0
200	PANI/CeO2	Training	Aniline	[Ani]	0.0011	Ammonium persulfate	[APS]	0.0004	/	[/]	0	Hydrochloric acid	[HCl]	30	1	Cerium dioxide	[CeO2]	0.0042	/	[/]	0	/	[/]	0		0	0	0	0	0	0	0	0	0	0	0.0009408	0.0079254	0.0278418	0.03696	0.0173964	0.0042126	0.0145908	0.0204162	0.012915	0.0100632	0.0076188	0.0017262	0.001344	0.0069174
201	PANI/CeO2	Training	Aniline	[Ani]	0.0011	Ammonium persulfate	[APS]	0.0004	/	[/]	0	Hydrochloric acid	[HCl]	30	1	Cerium dioxide	[CeO2]	0.0042	/	[/]	0	/	[/]	0		0	0	0	0	0	0	0	0	0	0	0.0009408	0.0079254	0.0278418	0.03696	0.0173964	0.0042126	0.0145908	0.0204162	0.012915	0.0100632	0.0076188	0.0017262	0.001344	0.0069174
202	PANI/CeO2	Test	Aniline	[Ani]	0.0011	Ammonium persulfate	[APS]	0.0004	/	[/]	0	Hydrochloric acid	[HCl]	30	1	Cerium dioxide	[CeO2]	0.0042	/	[/]	0	/	[/]	0		0	0	0	0	0	0	0	0	0	0	0.0009408	0.0079254	0.0278418	0.03696	0.0173964	0.0042126	0.0145908	0.0204162	0.012915	0.0100632	0.0076188	0.0017262	0.001344	0.0069174
203	PANI/CeO2	Training	Aniline	[Ani]	0.0011	Ammonium persulfate	[APS]	0.0004	/	[/]	0	Hydrochloric acid	[HCl]	30	1	Cerium dioxide	[CeO2]	0.0042	/	[/]	0	/	[/]	0		0	0	0	0	0	0	0	0	0	0	0.0009408	0.0079254	0.0278418	0.03696	0.0173964	0.0042126	0.0145908	0.0204162	0.012915	0.0100632	0.0076188	0.0017262	0.001344	0.0069174
204	PANI/CeO2	Test	Aniline	[Ani]	0.0011	Ammonium persulfate	[APS]	0.0004	/	[/]	0	Hydrochloric acid	[HCl]	30	1	Cerium dioxide	[CeO2]	0.0042	/	[/]	0	/	[/]	0		0	0	0	0	0	0	0	0	0	0	0.0009408	0.0079254	0.0278418	0.03696	0.0173964	0.0042126	0.0145908	0.0204162	0.012915	0.0100632	0.0076188	0.0017262	0.001344	0.0069174
205	PANI	Test	Aniline	[Ani]	0.0002	Ammonium persulfate	[APS]	0.0002	/	[/]	0	Hydrochloric acid	[HCl]	30	1	/	[/]	0	/	[/]	0	/	[/]	0		0	0	0	0	0	0	0	0	0	0	0	0	0	0	0	0	0	0	0	0	0	0	0	0
206	PANI	Training	Aniline	[Ani]	0.0002	Ammonium persulfate	[APS]	0.0002	/	[/]	0	Hydrochloric acid	[HCl]	30	1	/	[/]	0	/	[/]	0	/	[/]	0		0	0	0	0	0	0	0	0	0	0	0	0	0	0	0	0	0	0	0	0	0	0	0	0
207	PANI	Training	Aniline	[Ani]	0.0002	Ammonium persulfate	[APS]	0.0002	/	[/]	0	Hydrochloric acid	[HCl]	30	1	/	[/]	0	/	[/]	0	/	[/]	0		0	0	0	0	0	0	0	0	0	0	0	0	0	0	0	0	0	0	0	0	0	0	0	0
208	PANI	Training	Aniline	[Ani]	0.0002	Ammonium persulfate	[APS]	0.0002	/	[/]	0	Hydrochloric acid	[HCl]	30	1	/	[/]	0	/	[/]	0	/	[/]	0		0	0	0	0	0	0	0	0	0	0	0	0	0	0	0	0	0	0	0	0	0	0	0	0
209	PANI	Training	Aniline	[Ani]	0.0002	Ammonium persulfate	[APS]	0.0002	/	[/]	0	Hydrochloric acid	[HCl]	30	1	/	[/]	0	/	[/]	0	/	[/]	0		0	0	0	0	0	0	0	0	0	0	0	0	0	0	0	0	0	0	0	0	0	0	0	0
210	PANI	Training	Aniline	[Ani]	0.0002	Ammonium persulfate	[APS]	0.0002	/	[/]	0	Hydrochloric acid	[HCl]	30	1	/	[/]	0	/	[/]	0	/	[/]	0		0	0	0	0	0	0	0	0	0	0	0	0	0	0	0	0	0	0	0	0	0	0	0	0
211	PANI	Training	Aniline	[Ani]	0.0002	Ammonium persulfate	[APS]	0.0002	/	[/]	0	Hydrochloric acid	[HCl]	30	1	/	[/]	0	/	[/]	0	/	[/]	0		0	0	0	0	0	0	0	0	0	0	0	0	0	0	0	0	0	0	0	0	0	0	0	0
212	PANI	Training	Aniline	[Ani]	0.0003	Ammonium persulfate	[APS]	0.001	/	[/]	0	phytic acid	[C6H18O24P6]	0.39	1	Water	[H2O]	0.25	/	[/]	0	/	[/]	0		0	0	0	0	0	0	0	0	0	0	0	0	0.02925	0.151	0.485	0.781	0.616	0.4245	0.5385	0.4495	0.27125	0.32	0.27875	0.13375
213	PANI	Training	Aniline	[Ani]	0.0003	Ammonium persulfate	[APS]	0.001	/	[/]	0	phytic acid	[C6H18O24P6]	0.39	1	Water	[H2O]	0.25	/	[/]	0	/	[/]	0		0	0	0	0	0	0	0	0	0	0	0	0	0.02925	0.151	0.485	0.781	0.616	0.4245	0.5385	0.4495	0.27125	0.32	0.27875	0.13375
214	PANI	Training	Aniline	[Ani]	0.0003	Ammonium persulfate	[APS]	0.001	/	[/]	0	phytic acid	[C6H18O24P6]	0.39	1	Water	[H2O]	0.25	/	[/]	0	/	[/]	0		0	0	0	0	0	0	0	0	0	0	0	0	0.02925	0.151	0.485	0.781	0.616	0.4245	0.5385	0.4495	0.27125	0.32	0.27875	0.13375
215	PANI	Training	Aniline	[Ani]	0.0003	Ammonium persulfate	[APS]	0.001	/	[/]	0	phytic acid	[C6H18O24P6]	0.39	1	Water	[H2O]	0.25	/	[/]	0	/	[/]	0		0	0	0	0	0	0	0	0	0	0	0	0	0.02925	0.151	0.485	0.781	0.616	0.4245	0.5385	0.4495	0.27125	0.32	0.27875	0.13375
216	PANI	Training	Aniline	[Ani]	0.0003	Ammonium persulfate	[APS]	0.001	/	[/]	0	phytic acid	[C6H18O24P6]	0.39	1	Water	[H2O]	0.25	/	[/]	0	/	[/]	0		0	0	0	0	0	0	0	0	0	0	0	0	0.02925	0.151	0.485	0.781	0.616	0.4245	0.5385	0.4495	0.27125	0.32	0.27875	0.13375
217	PANI	Training	Aniline	[Ani]	0.0003	Ammonium persulfate	[APS]	0.001	/	[/]	0	phytic acid	[C6H18O24P6]	0.39	1	Water	[H2O]	0.25	/	[/]	0	/	[/]	0		0	0	0	0	0	0	0	0	0	0	0	0	0.02925	0.151	0.485	0.781	0.616	0.4245	0.5385	0.4495	0.27125	0.32	0.27875	0.13375
218	PANI	Training	Aniline	[Ani]	0.0003	Ammonium persulfate	[APS]	0.001	/	[/]	0	phytic acid	[C6H18O24P6]	0.39	1	Water	[H2O]	0.25	/	[/]	0	/	[/]	0		0	0	0	0	0	0	0	0	0	0	0	0	0.02925	0.151	0.485	0.781	0.616	0.4245	0.5385	0.4495	0.27125	0.32	0.27875	0.13375
219	PANI	Test	Aniline	[Ani]	0.0003	Ammonium persulfate	[APS]	0.001	/	[/]	0	phytic acid	[C6H18O24P6]	0.39	1	Water	[H2O]	0.25	/	[/]	0	/	[/]	0		0	0	0	0	0	0	0	0	0	0	0	0	0.02925	0.151	0.485	0.781	0.616	0.4245	0.5385	0.4495	0.27125	0.32	0.27875	0.13375
220	PANI/rGO	Training	Aniline	[Ani]	0.0003	Ammonium persulfate	[APS]	0.001	reduced graphene oxide	[rGO]	0.5	phytic acid	[C6H18O24P6]	0.39	1	Water	[H2O]	0.25	/	[/]	0	/	[/]	0		0	0	0	0	0	0	0	0	0	0	0	0	0.02925	0.151	0.485	0.781	0.616	0.4245	0.5385	0.4495	0.27125	0.32	0.27875	0.13375
221	PANI/rGO	Training	Aniline	[Ani]	0.0003	Ammonium persulfate	[APS]	0.001	reduced graphene oxide	[rGO]	0.75	phytic acid	[C6H18O24P6]	0.39	1	Water	[H2O]	0.25	/	[/]	0	/	[/]	0		0	0	0	0	0	0	0	0	0	0	0	0	0.02925	0.151	0.485	0.781	0.616	0.4245	0.5385	0.4495	0.27125	0.32	0.27875	0.13375
222	PANI/rGO	Test	Aniline	[Ani]	0.0003	Ammonium persulfate	[APS]	0.001	reduced graphene oxide	[rGO]	1	phytic acid	[C6H18O24P6]	0.39	1	Water	[H2O]	0.25	/	[/]	0	/	[/]	0		0	0	0	0	0	0	0	0	0	0	0	0	0.02925	0.151	0.485	0.781	0.616	0.4245	0.5385	0.4495	0.27125	0.32	0.27875	0.13375
223	PANI/rGO	Training	Aniline	[Ani]	0.0003	Ammonium persulfate	[APS]	0.001	reduced graphene oxide	[rGO]	2	phytic acid	[C6H18O24P6]	0.39	1	Water	[H2O]	0.25	/	[/]	0	/	[/]	0		0	0	0	0	0	0	0	0	0	0	0	0	0.02925	0.151	0.485	0.781	0.616	0.4245	0.5385	0.4495	0.27125	0.32	0.27875	0.13375
224	PANI/rGO	Training	Aniline	[Ani]	0.0003	Ammonium persulfate	[APS]	0.001	reduced graphene oxide	[rGO]	5	phytic acid	[C6H18O24P6]	0.39	1	Water	[H2O]	0.25	/	[/]	0	/	[/]	0		0	0	0	0	0	0	0	0	0	0	0	0	0.02925	0.151	0.485	0.781	0.616	0.4245	0.5385	0.4495	0.27125	0.32	0.27875	0.13375
225	PANI/GO	Training	Aniline	[Ani]	0.0003	Ammonium persulfate	[APS]	0.001	Graphene oxide	[GO]	0.5	phytic acid	[C6H18O24P6]	0.39	1	Water	[H2O]	0.25	/	[/]	0	/	[/]	0		0	0	0	0	0	0	0	0	0	0	0	0	0.02925	0.151	0.485	0.781	0.616	0.4245	0.5385	0.4495	0.27125	0.32	0.27875	0.13375
226	PANI/GO	Test	Aniline	[Ani]	0.0003	Ammonium persulfate	[APS]	0.001	Graphene oxide	[GO]	0.75	phytic acid	[C6H18O24P6]	0.39	1	Water	[H2O]	0.25	/	[/]	0	/	[/]	0		0	0	0	0	0	0	0	0	0	0	0	0	0.02925	0.151	0.485	0.781	0.616	0.4245	0.5385	0.4495	0.27125	0.32	0.27875	0.13375
227	PANI/GO	Training	Aniline	[Ani]	0.0003	Ammonium persulfate	[APS]	0.001	Graphene oxide	[GO]	1	phytic acid	[C6H18O24P6]	0.39	1	Water	[H2O]	0.25	/	[/]	0	/	[/]	0		0	0	0	0	0	0	0	0	0	0	0	0	0.02925	0.151	0.485	0.781	0.616	0.4245	0.5385	0.4495	0.27125	0.32	0.27875	0.13375
228	PANI/GO	Test	Aniline	[Ani]	0.0003	Ammonium persulfate	[APS]	0.001	Graphene oxide	[GO]	2	phytic acid	[C6H18O24P6]	0.39	1	Water	[H2O]	0.25	/	[/]	0	/	[/]	0		0	0	0	0	0	0	0	0	0	0	0	0	0.02925	0.151	0.485	0.781	0.616	0.4245	0.5385	0.4495	0.27125	0.32	0.27875	0.13375
229	PANI/GO	Training	Aniline	[Ani]	0.0003	Ammonium persulfate	[APS]	0.001	Graphene oxide	[GO]	5	phytic acid	[C6H18O24P6]	0.39	1	Water	[H2O]	0.25	/	[/]	0	/	[/]	0		0	0	0	0	0	0	0	0	0	0	0	0	0.02925	0.151	0.485	0.781	0.616	0.4245	0.5385	0.4495	0.27125	0.32	0.27875	0.13375
230	Saravanan, K. K., Siva Karthik, P., Mirtha, P. R., Balaji, J., & Rajeshkanna, B. (2020). A one-pot hydrothermal-induced PANI/SnO2 and PANI/SnO2/rGO ternary composites for high-performance chemiresistive-based H2S and NH3 gas sensors. Journal of Materials Science: Materials in Electronics, 31(11), 8825-8836.	Training	Aniline	[Ani]	0.1	Ammonium persulfate	[APS]	0.1	Graphene oxide	[GO]	5	Hydrochloric acid	[HCl]	100	1	Water	[H2O]	2.7778	Chloroform	[CHCl3]	0.6241	Tin(IV) oxide	[SnO2]	0.0066		0	0	0	0	0	0	0	0	0	0	0	0	0.325003	1.67779	5.38893	8.67785	6.9927	5.6139	7.60372	6.25434	3.79638	4.41896	3.83814	2.28355
231	PANI/rGO-SnO2	Training	Aniline	[Ani]	0.1	Ammonium persulfate	[APS]	0.1	Graphene oxide	[GO]	5	Hydrochloric acid	[HCl]	100	1	Water	[H2O]	2.7778	Chloroform	[CHCl3]	0.6241	Tin(IV) oxide	[SnO2]	0.0066		0	0	0	0	0	0	0	0	0	0	0	0	0.325003	1.67779	5.38893	8.67785	6.9927	5.6139	7.60372	6.25434	3.79638	4.41896	3.83814	2.28355
232	PANI/rGO-SnO2	Training	Aniline	[Ani]	0.1	Ammonium persulfate	[APS]	0.1	Graphene oxide	[GO]	5	Hydrochloric acid	[HCl]	100	1	Water	[H2O]	2.7778	Chloroform	[CHCl3]	0.6241	Tin(IV) oxide	[SnO2]	0.0066		0	0	0	0	0	0	0	0	0	0	0	0	0.325003	1.67779	5.38893	8.67785	6.9927	5.6139	7.60372	6.25434	3.79638	4.41896	3.83814	2.28355
233	PANI/rGO-SnO2	Training	Aniline	[Ani]	0.1	Ammonium persulfate	[APS]	0.1	Graphene oxide	[GO]	5	Hydrochloric acid	[HCl]	100	1	Water	[H2O]	2.7778	Chloroform	[CHCl3]	0.6241	Tin(IV) oxide	[SnO2]	0.0066		0	0	0	0	0	0	0	0	0	0	0	0	0.325003	1.67779	5.38893	8.67785	6.9927	5.6139	7.60372	6.25434	3.79638	4.41896	3.83814	2.28355
234	PANI/rGO-SnO2	Training	Aniline	[Ani]	0.1	Ammonium persulfate	[APS]	0.1	Graphene oxide	[GO]	5	Hydrochloric acid	[HCl]	100	1	Water	[H2O]	2.7778	Chloroform	[CHCl3]	0.6241	Tin(IV) oxide	[SnO2]	0.0066		0	0	0	0	0	0	0	0	0	0	0	0	0.325003	1.67779	5.38893	8.67785	6.9927	5.6139	7.60372	6.25434	3.79638	4.41896	3.83814	2.28355
235	PANI	Training	Aniline	[Ani]	0.1	Ammonium persulfate	[APS]	0.1	/	[/]	0	Hydrochloric acid	[HCl]	100	1	Water	[H2O]	2.7778	/	[/]	0	/	[/]	0		0	0	0	0	0	0	0	0	0	0	0	0	0.325003	1.67779	5.38893	8.67785	6.8445	4.7167	5.98338	4.99448	3.01391	3.55558	3.09725	1.48612
236	PANI	Training	Aniline	[Ani]	0.1	Ammonium persulfate	[APS]	0.1	/	[/]	0	Hydrochloric acid	[HCl]	100	1	Water	[H2O]	2.7778	/	[/]	0	/	[/]	0		0	0	0	0	0	0	0	0	0	0	0	0	0.325003	1.67779	5.38893	8.67785	6.8445	4.7167	5.98338	4.99448	3.01391	3.55558	3.09725	1.48612
237	PANI	Training	Aniline	[Ani]	0.1	Ammonium persulfate	[APS]	0.1	/	[/]	0	Hydrochloric acid	[HCl]	100	1	Water	[H2O]	2.7778	/	[/]	0	/	[/]	0		0	0	0	0	0	0	0	0	0	0	0	0	0.325003	1.67779	5.38893	8.67785	6.8445	4.7167	5.98338	4.99448	3.01391	3.55558	3.09725	1.48612
238	PANI	Training	Aniline	[Ani]	0.1	Ammonium persulfate	[APS]	0.1	/	[/]	0	Hydrochloric acid	[HCl]	100	1	Water	[H2O]	2.7778	/	[/]	0	/	[/]	0		0	0	0	0	0	0	0	0	0	0	0	0	0.325003	1.67779	5.38893	8.67785	6.8445	4.7167	5.98338	4.99448	3.01391	3.55558	3.09725	1.48612
239	PANI	Test	Aniline	[Ani]	0.1	Ammonium persulfate	[APS]	0.1	/	[/]	0	Hydrochloric acid	[HCl]	100	1	Water	[H2O]	2.7778	/	[/]	0	/	[/]	0		0	0	0	0	0	0	0	0	0	0	0	0	0.325003	1.67779	5.38893	8.67785	6.8445	4.7167	5.98338	4.99448	3.01391	3.55558	3.09725	1.48612
240	PANI/rGO-SnO2	Training	Aniline	[Ani]	0.1	Ammonium persulfate	[APS]	0.1	Graphene oxide	[GO]	5	Hydrochloric acid	[HCl]	100	1	Water	[H2O]	2.7778	Chloroform	[CHCl3]	0.6241	Tin(IV) oxide	[SnO2]	0.0066		0	0	0	0	0	0	0	0	0	0	0	0	0.325003	1.67779	5.38893	8.67785	6.9927	5.6139	7.60372	6.25434	3.79638	4.41896	3.83814	2.28355
241	PANI	Training	Aniline	[Ani]	0.002	Ammonium persulfate	[APS]	0.002	/	[/]	0	Hydrochloric acid	[HCl]	70	1	/	[/]	0	/	[/]	0	/	[/]	0		0	0	0	0	0	0	0	0	0	0	0	0	0	0	0	0	0	0	0	0	0	0	0	0
242	PANI	Training	Aniline	[Ani]	0.002	Ammonium persulfate	[APS]	0.002	/	[/]	0	Hydrochloric acid	[HCl]	70	1	/	[/]	0	/	[/]	0	/	[/]	0		0	0	0	0	0	0	0	0	0	0	0	0	0	0	0	0	0	0	0	0	0	0	0	0
243	PANI	Test	Aniline	[Ani]	0.002	Ammonium persulfate	[APS]	0.002	/	[/]	0	Hydrochloric acid	[HCl]	70	1	/	[/]	0	/	[/]	0	/	[/]	0		0	0	0	0	0	0	0	0	0	0	0	0	0	0	0	0	0	0	0	0	0	0	0	0
244	PANI	Training	Aniline	[Ani]	0.002	Ammonium persulfate	[APS]	0.002	/	[/]	0	Hydrochloric acid	[HCl]	70	1	/	[/]	0	/	[/]	0	/	[/]	0		0	0	0	0	0	0	0	0	0	0	0	0	0	0	0	0	0	0	0	0	0	0	0	0
245	PANI	Training	Aniline	[Ani]	0.002	Ammonium persulfate	[APS]	0.002	/	[/]	0	Hydrochloric acid	[HCl]	70	1	/	[/]	0	/	[/]	0	/	[/]	0		0	0	0	0	0	0	0	0	0	0	0	0	0	0	0	0	0	0	0	0	0	0	0	0
246	PANI	Training	Aniline	[Ani]	0.002	Ammonium persulfate	[APS]	0.002	/	[/]	0	Hydrochloric acid	[HCl]	70	1	/	[/]	0	/	[/]	0	/	[/]	0		0	0	0	0	0	0	0	0	0	0	0	0	0	0	0	0	0	0	0	0	0	0	0	0
247	PANI	Training	Aniline	[Ani]	0.002	Ammonium persulfate	[APS]	0.002	/	[/]	0	Hydrochloric acid	[HCl]	70	1	/	[/]	0	/	[/]	0	/	[/]	0		0	0	0	0	0	0	0	0	0	0	0	0	0	0	0	0	0	0	0	0	0	0	0	0
248	PANI/Gr/In2O3	Training	Aniline	[Ani]	0.002	Ammonium persulfate	[APS]	0.002	Graphene	[Gr]	3	Hydrochloric acid	[HCl]	70	1	Isopropyl alcohol	[C3H8O]	0.7324	Glycerol	[C3H8O3]	0.0547	Indium oxide	[In2O3]	0.0003		0	0	0	0	0	0	0	0	0	3.87e-05	0.0029688	0.011792	0.0673946	0.379354	0.748765	0.774167	0.726467	0.772203	0.684884	0.427246	0.332908	0.46859	0.572367	0.807918
249	PANI/Gr/In2O3	Training	Aniline	[Ani]	0.002	Ammonium persulfate	[APS]	0.002	Graphene	[Gr]	3	Hydrochloric acid	[HCl]	70	1	Isopropyl alcohol	[C3H8O]	0.7324	Glycerol	[C3H8O3]	0.0547	Indium oxide	[In2O3]	0.0003		0	0	0	0	0	0	0	0	0	3.87e-05	0.0029688	0.011792	0.0673946	0.379354	0.748765	0.774167	0.726467	0.772203	0.684884	0.427246	0.332908	0.46859	0.572367	0.807918
250	PANI/Gr/In2O3	Test	Aniline	[Ani]	0.002	Ammonium persulfate	[APS]	0.002	Graphene	[Gr]	3	Hydrochloric acid	[HCl]	70	1	Isopropyl alcohol	[C3H8O]	0.7324	Glycerol	[C3H8O3]	0.0547	Indium oxide	[In2O3]	0.0003		0	0	0	0	0	0	0	0	0	3.87e-05	0.0029688	0.011792	0.0673946	0.379354	0.748765	0.774167	0.726467	0.772203	0.684884	0.427246	0.332908	0.46859	0.572367	0.807918
251	PANI/Gr/In2O3	Training	Aniline	[Ani]	0.002	Ammonium persulfate	[APS]	0.002	Graphene	[Gr]	3	Hydrochloric acid	[HCl]	70	1	Isopropyl alcohol	[C3H8O]	0.7324	Glycerol	[C3H8O3]	0.0547	Indium oxide	[In2O3]	0.0003		0	0	0	0	0	0	0	0	0	3.87e-05	0.0029688	0.011792	0.0673946	0.379354	0.748765	0.774167	0.726467	0.772203	0.684884	0.427246	0.332908	0.46859	0.572367	0.807918
252	PANI/Gr/In2O3	Training	Aniline	[Ani]	0.002	Ammonium persulfate	[APS]	0.002	Graphene	[Gr]	3	Hydrochloric acid	[HCl]	70	1	Isopropyl alcohol	[C3H8O]	0.7324	Glycerol	[C3H8O3]	0.0547	Indium oxide	[In2O3]	0.0003		0	0	0	0	0	0	0	0	0	3.87e-05	0.0029688	0.011792	0.0673946	0.379354	0.748765	0.774167	0.726467	0.772203	0.684884	0.427246	0.332908	0.46859	0.572367	0.807918
253	PANI/Gr/In2O3	Training	Aniline	[Ani]	0.002	Ammonium persulfate	[APS]	0.002	Graphene	[Gr]	3	Hydrochloric acid	[HCl]	70	1	Isopropyl alcohol	[C3H8O]	0.7324	Glycerol	[C3H8O3]	0.0547	Indium oxide	[In2O3]	0.0003		0	0	0	0	0	0	0	0	0	3.87e-05	0.0029688	0.011792	0.0673946	0.379354	0.748765	0.774167	0.726467	0.772203	0.684884	0.427246	0.332908	0.46859	0.572367	0.807918
254	PANI/Gr/In2O3	Training	Aniline	[Ani]	0.002	Ammonium persulfate	[APS]	0.002	Graphene	[Gr]	3	Hydrochloric acid	[HCl]	70	1	Isopropyl alcohol	[C3H8O]	0.7324	Glycerol	[C3H8O3]	0.0547	Indium oxide	[In2O3]	0.0003		0	0	0	0	0	0	0	0	0	3.87e-05	0.0029688	0.011792	0.0673946	0.379354	0.748765	0.774167	0.726467	0.772203	0.684884	0.427246	0.332908	0.46859	0.572367	0.807918
255	PANI/Gr/In2O3	Training	Aniline	[Ani]	0.002	Ammonium persulfate	[APS]	0.002	Graphene	[Gr]	10	Hydrochloric acid	[HCl]	70	1	Isopropyl alcohol	[C3H8O]	0.7324	Glycerol	[C3H8O3]	0.0547	Indium oxide	[In2O3]	0.0003		0	0	0	0	0	0	0	0	0	3.87e-05	0.0029688	0.011792	0.0673946	0.379354	0.748765	0.774167	0.726467	0.772203	0.684884	0.427246	0.332908	0.46859	0.572367	0.807918
256	PANI/Gr/In2O3	Training	Aniline	[Ani]	0.002	Ammonium persulfate	[APS]	0.002	Graphene	[Gr]	10	Hydrochloric acid	[HCl]	70	1	Isopropyl alcohol	[C3H8O]	0.7324	Glycerol	[C3H8O3]	0.0547	Indium oxide	[In2O3]	0.0003		0	0	0	0	0	0	0	0	0	3.87e-05	0.0029688	0.011792	0.0673946	0.379354	0.748765	0.774167	0.726467	0.772203	0.684884	0.427246	0.332908	0.46859	0.572367	0.807918
257	PANI/Gr/In2O3	Training	Aniline	[Ani]	0.002	Ammonium persulfate	[APS]	0.002	Graphene	[Gr]	10	Hydrochloric acid	[HCl]	70	1	Isopropyl alcohol	[C3H8O]	0.7324	Glycerol	[C3H8O3]	0.0547	Indium oxide	[In2O3]	0.0003		0	0	0	0	0	0	0	0	0	3.87e-05	0.0029688	0.011792	0.0673946	0.379354	0.748765	0.774167	0.726467	0.772203	0.684884	0.427246	0.332908	0.46859	0.572367	0.807918
258	PANI/Gr/In2O3	Training	Aniline	[Ani]	0.002	Ammonium persulfate	[APS]	0.002	Graphene	[Gr]	10	Hydrochloric acid	[HCl]	70	1	Isopropyl alcohol	[C3H8O]	0.7324	Glycerol	[C3H8O3]	0.0547	Indium oxide	[In2O3]	0.0003		0	0	0	0	0	0	0	0	0	3.87e-05	0.0029688	0.011792	0.0673946	0.379354	0.748765	0.774167	0.726467	0.772203	0.684884	0.427246	0.332908	0.46859	0.572367	0.807918
259	PANI/Gr/In2O3	Training	Aniline	[Ani]	0.002	Ammonium persulfate	[APS]	0.002	Graphene	[Gr]	10	Hydrochloric acid	[HCl]	70	1	Isopropyl alcohol	[C3H8O]	0.7324	Glycerol	[C3H8O3]	0.0547	Indium oxide	[In2O3]	0.0003		0	0	0	0	0	0	0	0	0	3.87e-05	0.0029688	0.011792	0.0673946	0.379354	0.748765	0.774167	0.726467	0.772203	0.684884	0.427246	0.332908	0.46859	0.572367	0.807918
260	PANI/Gr/In2O3	Training	Aniline	[Ani]	0.002	Ammonium persulfate	[APS]	0.002	Graphene	[Gr]	10	Hydrochloric acid	[HCl]	70	1	Isopropyl alcohol	[C3H8O]	0.7324	Glycerol	[C3H8O3]	0.0547	Indium oxide	[In2O3]	0.0003		0	0	0	0	0	0	0	0	0	3.87e-05	0.0029688	0.011792	0.0673946	0.379354	0.748765	0.774167	0.726467	0.772203	0.684884	0.427246	0.332908	0.46859	0.572367	0.807918
261	PANI/Gr/In2O3	Training	Aniline	[Ani]	0.002	Ammonium persulfate	[APS]	0.002	Graphene	[Gr]	10	Hydrochloric acid	[HCl]	70	1	Isopropyl alcohol	[C3H8O]	0.7324	Glycerol	[C3H8O3]	0.0547	Indium oxide	[In2O3]	0.0003		0	0	0	0	0	0	0	0	0	3.87e-05	0.0029688	0.011792	0.0673946	0.379354	0.748765	0.774167	0.726467	0.772203	0.684884	0.427246	0.332908	0.46859	0.572367	0.807918
262	PANI/GO	Training	Aniline	[Ani]	0.011	Ammonium persulfate	[APS]	0.011	Graphene oxide	[GO]	10	Hydrochloric acid	[HCl]	80	1	/	[/]	0	/	[/]	0	/	[/]	0		0	0	0	0	0	0	0	0	0	0	0	0	0	0	0	0	0	0	0	0	0	0	0	0
263	PANI/GO	Test	Aniline	[Ani]	0.011	Ammonium persulfate	[APS]	0.011	Graphene oxide	[GO]	10	Hydrochloric acid	[HCl]	80	1	/	[/]	0	/	[/]	0	/	[/]	0		0	0	0	0	0	0	0	0	0	0	0	0	0	0	0	0	0	0	0	0	0	0	0	0
264	PANI/GO	Training	Aniline	[Ani]	0.011	Ammonium persulfate	[APS]	0.011	Graphene oxide	[GO]	10	Hydrochloric acid	[HCl]	80	1	/	[/]	0	/	[/]	0	/	[/]	0		0	0	0	0	0	0	0	0	0	0	0	0	0	0	0	0	0	0	0	0	0	0	0	0
265	PANI/GO	Training	Aniline	[Ani]	0.011	Ammonium persulfate	[APS]	0.011	Graphene oxide	[GO]	10	Hydrochloric acid	[HCl]	80	1	/	[/]	0	/	[/]	0	/	[/]	0		0	0	0	0	0	0	0	0	0	0	0	0	0	0	0	0	0	0	0	0	0	0	0	0
266	PANI/GO	Training	Aniline	[Ani]	0.011	Ammonium persulfate	[APS]	0.011	Graphene oxide	[GO]	10	Hydrochloric acid	[HCl]	80	1	/	[/]	0	/	[/]	0	/	[/]	0		0	0	0	0	0	0	0	0	0	0	0	0	0	0	0	0	0	0	0	0	0	0	0	0
267	PANI/GO	Training	Aniline	[Ani]	0.011	Ammonium persulfate	[APS]	0.011	Graphene oxide	[GO]	10	Hydrochloric acid	[HCl]	80	1	/	[/]	0	/	[/]	0	/	[/]	0		0	0	0	0	0	0	0	0	0	0	0	0	0	0	0	0	0	0	0	0	0	0	0	0
268	PANI	Training	Aniline	[Ani]	0.011	Ammonium persulfate	[APS]	0.011	/	[/]	0	Hydrochloric acid	[HCl]	80	1	/	[/]	0	/	[/]	0	/	[/]	0		0	0	0	0	0	0	0	0	0	0	0	0	0	0	0	0	0	0	0	0	0	0	0	0
269	PANI	Training	Aniline	[Ani]	0.011	Ammonium persulfate	[APS]	0.011	/	[/]	0	Hydrochloric acid	[HCl]	80	1	/	[/]	0	/	[/]	0	/	[/]	0		0	0	0	0	0	0	0	0	0	0	0	0	0	0	0	0	0	0	0	0	0	0	0	0
270	PANI	Training	Aniline	[Ani]	0.011	Ammonium persulfate	[APS]	0.011	/	[/]	0	Hydrochloric acid	[HCl]	80	1	/	[/]	0	/	[/]	0	/	[/]	0		0	0	0	0	0	0	0	0	0	0	0	0	0	0	0	0	0	0	0	0	0	0	0	0
271	PANI	Training	Aniline	[Ani]	0.011	Ammonium persulfate	[APS]	0.011	/	[/]	0	Hydrochloric acid	[HCl]	80	1	/	[/]	0	/	[/]	0	/	[/]	0		0	0	0	0	0	0	0	0	0	0	0	0	0	0	0	0	0	0	0	0	0	0	0	0
272	PANI	Test	Aniline	[Ani]	0.011	Ammonium persulfate	[APS]	0.011	/	[/]	0	Hydrochloric acid	[HCl]	80	1	/	[/]	0	/	[/]	0	/	[/]	0		0	0	0	0	0	0	0	0	0	0	0	0	0	0	0	0	0	0	0	0	0	0	0	0
273	PANI	Training	Aniline	[Ani]	0.011	Ammonium persulfate	[APS]	0.011	/	[/]	0	Hydrochloric acid	[HCl]	80	1	/	[/]	0	/	[/]	0	/	[/]	0		0	0	0	0	0	0	0	0	0	0	0	0	0	0	0	0	0	0	0	0	0	0	0	0
274	PANI/GO	Training	Aniline	[Ani]	0.011	Ammonium persulfate	[APS]	0.011	Graphene oxide	[GO]	10	Hydrochloric acid	[HCl]	80	1	/	[/]	0	/	[/]	0	/	[/]	0		0	0	0	0	0	0	0	0	0	0	0	0	0	0	0	0	0	0	0	0	0	0	0	0
275	PANI/GO	Training	Aniline	[Ani]	0.011	Ammonium persulfate	[APS]	0.011	Graphene oxide	[GO]	10	Hydrochloric acid	[HCl]	80	1	/	[/]	0	/	[/]	0	/	[/]	0		0	0	0	0	0	0	0	0	0	0	0	0	0	0	0	0	0	0	0	0	0	0	0	0
276	PANI/GO	Test	Aniline	[Ani]	0.011	Ammonium persulfate	[APS]	0.011	Graphene oxide	[GO]	10	Hydrochloric acid	[HCl]	80	1	/	[/]	0	/	[/]	0	/	[/]	0		0	0	0	0	0	0	0	0	0	0	0	0	0	0	0	0	0	0	0	0	0	0	0	0
277	PANI/GO	Training	Aniline	[Ani]	0.011	Ammonium persulfate	[APS]	0.011	Graphene oxide	[GO]	10	Hydrochloric acid	[HCl]	80	1	/	[/]	0	/	[/]	0	/	[/]	0		0	0	0	0	0	0	0	0	0	0	0	0	0	0	0	0	0	0	0	0	0	0	0	0
278	PANI/GO	Test	Aniline	[Ani]	0.011	Ammonium persulfate	[APS]	0.011	Graphene oxide	[GO]	10	Hydrochloric acid	[HCl]	80	1	/	[/]	0	/	[/]	0	/	[/]	0		0	0	0	0	0	0	0	0	0	0	0	0	0	0	0	0	0	0	0	0	0	0	0	0
279	PANI/GO	Training	Aniline	[Ani]	0.011	Ammonium persulfate	[APS]	0.011	Graphene oxide	[GO]	10	Hydrochloric acid	[HCl]	80	1	/	[/]	0	/	[/]	0	/	[/]	0		0	0	0	0	0	0	0	0	0	0	0	0	0	0	0	0	0	0	0	0	0	0	0	0
280	PANI/Gr	Test	Aniline	[Ani]	0.0385	Ammonium persulfate	[APS]	0.0087	Graphene	[Gr]	0.1	Hydrochloric acid	[HCl]	80	1	Water	[H2O]	5.5556	Ethanol	[C2H5OH]	1.7126	/	[/]	0		0	0	0	0	0	0	0	0	0	0	0	0	0.82469	4.2547	12.6172	19.219	14.7885	10.5723	13.5835	11.2803	6.72828	7.55816	6.96516	4.57524
281	PANI	Training	Aniline	[Ani]	0.0385	Ammonium persulfate	[APS]	0.0087	/	[/]	0	Hydrochloric acid	[HCl]	390	1	Water	[H2O]	5.5556	Ethanol	[C2H5OH]	1.7126	/	[/]	0		0	0	0	0	0	0	0	0	0	0	0	0	0.82469	4.2547	12.6172	19.219	14.7885	10.5723	13.5835	11.2803	6.72828	7.55816	6.96516	4.57524
282	PANI	Training	Aniline	[Ani]	0.0385	Ammonium persulfate	[APS]	0.0087	/	[/]	0	Hydrochloric acid	[HCl]	390	1	Water	[H2O]	5.5556	Ethanol	[C2H5OH]	1.7126	/	[/]	0		0	0	0	0	0	0	0	0	0	0	0	0	0.82469	4.2547	12.6172	19.219	14.7885	10.5723	13.5835	11.2803	6.72828	7.55816	6.96516	4.57524
283	PANI	Training	Aniline	[Ani]	0.0385	Ammonium persulfate	[APS]	0.0087	/	[/]	0	Hydrochloric acid	[HCl]	390	1	Water	[H2O]	5.5556	Ethanol	[C2H5OH]	1.7126	/	[/]	0		0	0	0	0	0	0	0	0	0	0	0	0	0.82469	4.2547	12.6172	19.219	14.7885	10.5723	13.5835	11.2803	6.72828	7.55816	6.96516	4.57524
284	PANI/Gr	Test	Aniline	[Ani]	0.0385	Ammonium persulfate	[APS]	0.0087	Graphene	[Gr]	0.1	Hydrochloric acid	[HCl]	390	1	Water	[H2O]	5.5556	Ethanol	[C2H5OH]	1.7126	/	[/]	0		0	0	0	0	0	0	0	0	0	0	0	0	0.82469	4.2547	12.6172	19.219	14.7885	10.5723	13.5835	11.2803	6.72828	7.55816	6.96516	4.57524
285	PANI/Gr	Training	Aniline	[Ani]	0.0385	Ammonium persulfate	[APS]	0.0087	Graphene	[Gr]	0.1	Hydrochloric acid	[HCl]	390	1	Water	[H2O]	5.5556	Ethanol	[C2H5OH]	1.7126	/	[/]	0		0	0	0	0	0	0	0	0	0	0	0	0	0.82469	4.2547	12.6172	19.219	14.7885	10.5723	13.5835	11.2803	6.72828	7.55816	6.96516	4.57524
286	PANI/Gr	Test	Aniline	[Ani]	0.0385	Ammonium persulfate	[APS]	0.0087	Graphene	[Gr]	0.1	Hydrochloric acid	[HCl]	390	1	Water	[H2O]	5.5556	Ethanol	[C2H5OH]	1.7126	/	[/]	0		0	0	0	0	0	0	0	0	0	0	0	0	0.82469	4.2547	12.6172	19.219	14.7885	10.5723	13.5835	11.2803	6.72828	7.55816	6.96516	4.57524
287	PANI/Gr	Training	Aniline	[Ani]	0.0385	Ammonium persulfate	[APS]	0.0087	Graphene	[Gr]	0.1	Hydrochloric acid	[HCl]	390	1	Water	[H2O]	5.5556	Ethanol	[C2H5OH]	1.7126	/	[/]	0		0	0	0	0	0	0	0	0	0	0	0	0	0.82469	4.2547	12.6172	19.219	14.7885	10.5723	13.5835	11.2803	6.72828	7.55816	6.96516	4.57524
288	PANI/Gr	Training	Aniline	[Ani]	0.0385	Ammonium persulfate	[APS]	0.0087	Graphene	[Gr]	0.1	Hydrochloric acid	[HCl]	390	1	Water	[H2O]	5.5556	Ethanol	[C2H5OH]	1.7126	/	[/]	0		0	0	0	0	0	0	0	0	0	0	0	0	0.82469	4.2547	12.6172	19.219	14.7885	10.5723	13.5835	11.2803	6.72828	7.55816	6.96516	4.57524
289	PANI/Gr	Training	Aniline	[Ani]	0.0385	Ammonium persulfate	[APS]	0.0087	Graphene	[Gr]	0.1	Hydrochloric acid	[HCl]	390	1	Water	[H2O]	5.5556	Ethanol	[C2H5OH]	1.7126	/	[/]	0		0	0	0	0	0	0	0	0	0	0	0	0	0.82469	4.2547	12.6172	19.219	14.7885	10.5723	13.5835	11.2803	6.72828	7.55816	6.96516	4.57524
290	PANI/Gr	Training	Aniline	[Ani]	0.0385	Ammonium persulfate	[APS]	0.0087	Graphene	[Gr]	0.1	Hydrochloric acid	[HCl]	390	1	Water	[H2O]	5.5556	Ethanol	[C2H5OH]	1.7126	/	[/]	0		0	0	0	0	0	0	0	0	0	0	0	0	0.82469	4.2547	12.6172	19.219	14.7885	10.5723	13.5835	11.2803	6.72828	7.55816	6.96516	4.57524
291	PANI/Gr	Training	Aniline	[Ani]	0.0385	Ammonium persulfate	[APS]	0.0087	Graphene	[Gr]	0.1	Hydrochloric acid	[HCl]	390	1	Water	[H2O]	5.5556	Ethanol	[C2H5OH]	1.7126	/	[/]	0		0	0	0	0	0	0	0	0	0	0	0	0	0.82469	4.2547	12.6172	19.219	14.7885	10.5723	13.5835	11.2803	6.72828	7.55816	6.96516	4.57524
292	PANI/Gr	Test	Aniline	[Ani]	0.0385	Ammonium persulfate	[APS]	0.0087	Graphene	[Gr]	0.1	Hydrochloric acid	[HCl]	390	1	Water	[H2O]	5.5556	Ethanol	[C2H5OH]	1.7126	/	[/]	0		0	0	0	0	0	0	0	0	0	0	0	0	0.82469	4.2547	12.6172	19.219	14.7885	10.5723	13.5835	11.2803	6.72828	7.55816	6.96516	4.57524
293	PANI/Gr	Training	Aniline	[Ani]	0.0385	Ammonium persulfate	[APS]	0.0087	Graphene	[Gr]	0.1	Hydrochloric acid	[HCl]	390	1	Water	[H2O]	5.5556	Ethanol	[C2H5OH]	1.7126	/	[/]	0		0	0	0	0	0	0	0	0	0	0	0	0	0.82469	4.2547	12.6172	19.219	14.7885	10.5723	13.5835	11.2803	6.72828	7.55816	6.96516	4.57524
294	PANI/Gr	Training	Aniline	[Ani]	0.0385	Ammonium persulfate	[APS]	0.0087	Graphene	[Gr]	0.3	Hydrochloric acid	[HCl]	390	1	Water	[H2O]	5.5556	Ethanol	[C2H5OH]	1.7126	/	[/]	0		0	0	0	0	0	0	0	0	0	0	0	0	0.82469	4.2547	12.6172	19.219	14.7885	10.5723	13.5835	11.2803	6.72828	7.55816	6.96516	4.57524
295	PANI/Gr	Training	Aniline	[Ani]	0.0385	Ammonium persulfate	[APS]	0.0087	Graphene	[Gr]	0.3	Hydrochloric acid	[HCl]	390	1	Water	[H2O]	5.5556	Ethanol	[C2H5OH]	1.7126	/	[/]	0		0	0	0	0	0	0	0	0	0	0	0	0	0.82469	4.2547	12.6172	19.219	14.7885	10.5723	13.5835	11.2803	6.72828	7.55816	6.96516	4.57524
296	PANI/Gr	Training	Aniline	[Ani]	0.0385	Ammonium persulfate	[APS]	0.0087	Graphene	[Gr]	0.3	Hydrochloric acid	[HCl]	390	1	Water	[H2O]	5.5556	Ethanol	[C2H5OH]	1.7126	/	[/]	0		0	0	0	0	0	0	0	0	0	0	0	0	0.82469	4.2547	12.6172	19.219	14.7885	10.5723	13.5835	11.2803	6.72828	7.55816	6.96516	4.57524
297	PANI/Gr	Test	Aniline	[Ani]	0.0385	Ammonium persulfate	[APS]	0.0087	Graphene	[Gr]	0.3	Hydrochloric acid	[HCl]	390	1	Water	[H2O]	5.5556	Ethanol	[C2H5OH]	1.7126	/	[/]	0		0	0	0	0	0	0	0	0	0	0	0	0	0.82469	4.2547	12.6172	19.219	14.7885	10.5723	13.5835	11.2803	6.72828	7.55816	6.96516	4.57524
298	PANI/Gr	Training	Aniline	[Ani]	0.0385	Ammonium persulfate	[APS]	0.0087	Graphene	[Gr]	0.3	Hydrochloric acid	[HCl]	390	1	Water	[H2O]	5.5556	Ethanol	[C2H5OH]	1.7126	/	[/]	0		0	0	0	0	0	0	0	0	0	0	0	0	0.82469	4.2547	12.6172	19.219	14.7885	10.5723	13.5835	11.2803	6.72828	7.55816	6.96516	4.57524
299	PANI/Gr	Training	Aniline	[Ani]	0.0385	Ammonium persulfate	[APS]	0.0087	Graphene	[Gr]	0.3	Hydrochloric acid	[HCl]	390	1	Water	[H2O]	5.5556	Ethanol	[C2H5OH]	1.7126	/	[/]	0		0	0	0	0	0	0	0	0	0	0	0	0	0.82469	4.2547	12.6172	19.219	14.7885	10.5723	13.5835	11.2803	6.72828	7.55816	6.96516	4.57524
300	PANI/Gr	Training	Aniline	[Ani]	0.0385	Ammonium persulfate	[APS]	0.0087	Graphene	[Gr]	0.3	Hydrochloric acid	[HCl]	390	1	Water	[H2O]	5.5556	Ethanol	[C2H5OH]	1.7126	/	[/]	0		0	0	0	0	0	0	0	0	0	0	0	0	0.82469	4.2547	12.6172	19.219	14.7885	10.5723	13.5835	11.2803	6.72828	7.55816	6.96516	4.57524
301	PANI/Gr	Test	Aniline	[Ani]	0.0385	Ammonium persulfate	[APS]	0.0087	Graphene	[Gr]	0.3	Hydrochloric acid	[HCl]	390	1	Water	[H2O]	5.5556	Ethanol	[C2H5OH]	1.7126	/	[/]	0		0	0	0	0	0	0	0	0	0	0	0	0	0.82469	4.2547	12.6172	19.219	14.7885	10.5723	13.5835	11.2803	6.72828	7.55816	6.96516	4.57524
302	PANI/Gr	Training	Aniline	[Ani]	0.0385	Ammonium persulfate	[APS]	0.0087	Graphene	[Gr]	0.3	Hydrochloric acid	[HCl]	390	1	Water	[H2O]	5.5556	Ethanol	[C2H5OH]	1.7126	/	[/]	0		0	0	0	0	0	0	0	0	0	0	0	0	0.82469	4.2547	12.6172	19.219	14.7885	10.5723	13.5835	11.2803	6.72828	7.55816	6.96516	4.57524
303	PANI/Gr	Training	Aniline	[Ani]	0.0385	Ammonium persulfate	[APS]	0.0087	Graphene	[Gr]	0.5	Hydrochloric acid	[HCl]	390	1	Water	[H2O]	5.5556	Ethanol	[C2H5OH]	1.7126	/	[/]	0		0	0	0	0	0	0	0	0	0	0	0	0	0.82469	4.2547	12.6172	19.219	14.7885	10.5723	13.5835	11.2803	6.72828	7.55816	6.96516	4.57524
304	PANI/Gr	Test	Aniline	[Ani]	0.0385	Ammonium persulfate	[APS]	0.0087	Graphene	[Gr]	0.5	Hydrochloric acid	[HCl]	390	1	Water	[H2O]	5.5556	Ethanol	[C2H5OH]	1.7126	/	[/]	0		0	0	0	0	0	0	0	0	0	0	0	0	0.82469	4.2547	12.6172	19.219	14.7885	10.5723	13.5835	11.2803	6.72828	7.55816	6.96516	4.57524
305	PANI/Gr	Training	Aniline	[Ani]	0.0385	Ammonium persulfate	[APS]	0.0087	Graphene	[Gr]	0.5	Hydrochloric acid	[HCl]	390	1	Water	[H2O]	5.5556	Ethanol	[C2H5OH]	1.7126	/	[/]	0		0	0	0	0	0	0	0	0	0	0	0	0	0.82469	4.2547	12.6172	19.219	14.7885	10.5723	13.5835	11.2803	6.72828	7.55816	6.96516	4.57524
306	PANI/Gr	Training	Aniline	[Ani]	0.0385	Ammonium persulfate	[APS]	0.0087	Graphene	[Gr]	0.5	Hydrochloric acid	[HCl]	390	1	Water	[H2O]	5.5556	Ethanol	[C2H5OH]	1.7126	/	[/]	0		0	0	0	0	0	0	0	0	0	0	0	0	0.82469	4.2547	12.6172	19.219	14.7885	10.5723	13.5835	11.2803	6.72828	7.55816	6.96516	4.57524
307	PANI/Gr	Training	Aniline	[Ani]	0.0385	Ammonium persulfate	[APS]	0.0087	Graphene	[Gr]	0.5	Hydrochloric acid	[HCl]	390	1	Water	[H2O]	5.5556	Ethanol	[C2H5OH]	1.7126	/	[/]	0		0	0	0	0	0	0	0	0	0	0	0	0	0.82469	4.2547	12.6172	19.219	14.7885	10.5723	13.5835	11.2803	6.72828	7.55816	6.96516	4.57524
308	PANI/Gr	Training	Aniline	[Ani]	0.0385	Ammonium persulfate	[APS]	0.0087	Graphene	[Gr]	0.5	Hydrochloric acid	[HCl]	390	1	Water	[H2O]	5.5556	Ethanol	[C2H5OH]	1.7126	/	[/]	0		0	0	0	0	0	0	0	0	0	0	0	0	0.82469	4.2547	12.6172	19.219	14.7885	10.5723	13.5835	11.2803	6.72828	7.55816	6.96516	4.57524
309	PANI/Gr	Training	Aniline	[Ani]	0.0385	Ammonium persulfate	[APS]	0.0087	Graphene	[Gr]	0.3	Hydrochloric acid	[HCl]	390	1	Water	[H2O]	5.5556	Ethanol	[C2H5OH]	1.7126	/	[/]	0		0	0	0	0	0	0	0	0	0	0	0	0	0.82469	4.2547	12.6172	19.219	14.7885	10.5723	13.5835	11.2803	6.72828	7.55816	6.96516	4.57524
310	PANI/Gr	Training	Aniline	[Ani]	0.0385	Ammonium persulfate	[APS]	0.0087	Graphene	[Gr]	0.3	Hydrochloric acid	[HCl]	390	1	Water	[H2O]	5.5556	Ethanol	[C2H5OH]	1.7126	/	[/]	0		0	0	0	0	0	0	0	0	0	0	0	0	0.82469	4.2547	12.6172	19.219	14.7885	10.5723	13.5835	11.2803	6.72828	7.55816	6.96516	4.57524
311	PANI/Gr	Training	Aniline	[Ani]	0.0385	Ammonium persulfate	[APS]	0.0087	Graphene	[Gr]	0.3	Hydrochloric acid	[HCl]	390	1	Water	[H2O]	5.5556	Ethanol	[C2H5OH]	1.7126	/	[/]	0		0	0	0	0	0	0	0	0	0	0	0	0	0.82469	4.2547	12.6172	19.219	14.7885	10.5723	13.5835	11.2803	6.72828	7.55816	6.96516	4.57524
312	PANI/Gr	Training	Aniline	[Ani]	0.0385	Ammonium persulfate	[APS]	0.0087	Graphene	[Gr]	0.3	Hydrochloric acid	[HCl]	390	1	Water	[H2O]	5.5556	Ethanol	[C2H5OH]	1.7126	/	[/]	0		0	0	0	0	0	0	0	0	0	0	0	0	0.82469	4.2547	12.6172	19.219	14.7885	10.5723	13.5835	11.2803	6.72828	7.55816	6.96516	4.57524
313	PANI/Gr	Training	Aniline	[Ani]	0.0385	Ammonium persulfate	[APS]	0.0087	Graphene	[Gr]	0.3	Hydrochloric acid	[HCl]	390	1	Water	[H2O]	5.5556	Ethanol	[C2H5OH]	1.7126	/	[/]	0		0	0	0	0	0	0	0	0	0	0	0	0	0.82469	4.2547	12.6172	19.219	14.7885	10.5723	13.5835	11.2803	6.72828	7.55816	6.96516	4.57524
314	PANI/Gr	Test	Aniline	[Ani]	0.0385	Ammonium persulfate	[APS]	0.0087	Graphene	[Gr]	0.3	Hydrochloric acid	[HCl]	390	1	Water	[H2O]	5.5556	Ethanol	[C2H5OH]	1.7126	/	[/]	0		0	0	0	0	0	0	0	0	0	0	0	0	0.82469	4.2547	12.6172	19.219	14.7885	10.5723	13.5835	11.2803	6.72828	7.55816	6.96516	4.57524
315	PANI/Gr	Training	Aniline	[Ani]	0.0385	Ammonium persulfate	[APS]	0.0087	Graphene	[Gr]	0.3	Hydrochloric acid	[HCl]	390	1	Water	[H2O]	5.5556	Ethanol	[C2H5OH]	1.7126	/	[/]	0		0	0	0	0	0	0	0	0	0	0	0	0	0.82469	4.2547	12.6172	19.219	14.7885	10.5723	13.5835	11.2803	6.72828	7.55816	6.96516	4.57524
316	PANI/V2O2	Test	Aniline	[Ani]	0.0044	Ammonium persulfate	[APS]	0.0004	/	[/]	0	Hydrochloric acid	[HCl]	10	1	Water	[H2O]	2.2	Vanadium oxide	[V2O5]	0.7389	/	[/]	0		0	0	0	0	0	0	0	0.0458118	0.753678	1.58937	1.797	2.11104	2.76966	3.69254	6.6576	9.93628	8.11187	5.75723	6.92816	5.74817	3.77392	4.49921	4.22414	2.48042
317	PANI/GO/V2O2	Test	Aniline	[Ani]	0.0044	Ammonium persulfate	[APS]	0.0004	Graphene oxide	[GO]	0.5	Hydrochloric acid	[HCl]	10	1	Water	[H2O]	2.2	Vanadium oxide	[V2O5]	0.7389	/	[/]	0		0	0	0	0	0	0	0	0.0458118	0.753678	1.58937	1.797	2.11104	2.76966	3.69254	6.6576	9.93628	8.11187	5.75723	6.92816	5.74817	3.77392	4.49921	4.22414	2.48042
318	PANI/GO/V2O2	Test	Aniline	[Ani]	0.0044	Ammonium persulfate	[APS]	0.0004	Graphene oxide	[GO]	1	Hydrochloric acid	[HCl]	10	1	Water	[H2O]	2.2	Vanadium oxide	[V2O5]	0.7389	/	[/]	0		0	0	0	0	0	0	0	0.0458118	0.753678	1.58937	1.797	2.11104	2.76966	3.69254	6.6576	9.93628	8.11187	5.75723	6.92816	5.74817	3.77392	4.49921	4.22414	2.48042
319	PANI/GO/V2O2	Training	Aniline	[Ani]	0.0044	Ammonium persulfate	[APS]	0.0004	Graphene oxide	[GO]	2	Hydrochloric acid	[HCl]	10	1	Water	[H2O]	2.2	Vanadium oxide	[V2O5]	0.7389	/	[/]	0		0	0	0	0	0	0	0	0.0458118	0.753678	1.58937	1.797	2.11104	2.76966	3.69254	6.6576	9.93628	8.11187	5.75723	6.92816	5.74817	3.77392	4.49921	4.22414	2.48042
320	PANI/GO/V2O2	Training	Aniline	[Ani]	0.0044	Ammonium persulfate	[APS]	0.0004	Graphene oxide	[GO]	4	Hydrochloric acid	[HCl]	10	1	Water	[H2O]	2.2	Vanadium oxide	[V2O5]	0.7389	/	[/]	0		0	0	0	0	0	0	0	0.0458118	0.753678	1.58937	1.797	2.11104	2.76966	3.69254	6.6576	9.93628	8.11187	5.75723	6.92816	5.74817	3.77392	4.49921	4.22414	2.48042
321	PANI/V2O2	Test	Aniline	[Ani]	0.0044	Ammonium persulfate	[APS]	0.0004	/	[/]	0	Hydrochloric acid	[HCl]	10	1	Water	[H2O]	2.2	Vanadium oxide	[V2O5]	0.7389	/	[/]	0		0	0	0	0	0	0	0	0.0458118	0.753678	1.58937	1.797	2.11104	2.76966	3.69254	6.6576	9.93628	8.11187	5.75723	6.92816	5.74817	3.77392	4.49921	4.22414	2.48042
322	PANI/GO/V2O2	Training	Aniline	[Ani]	0.0044	Ammonium persulfate	[APS]	0.0004	Graphene oxide	[GO]	1	Hydrochloric acid	[HCl]	10	1	Water	[H2O]	2.2	Vanadium oxide	[V2O5]	0.7389	/	[/]	0		0	0	0	0	0	0	0	0.0458118	0.753678	1.58937	1.797	2.11104	2.76966	3.69254	6.6576	9.93628	8.11187	5.75723	6.92816	5.74817	3.77392	4.49921	4.22414	2.48042
323	PANI/V2O2	Training	Aniline	[Ani]	0.0044	Ammonium persulfate	[APS]	0.0004	/	[/]	0	Hydrochloric acid	[HCl]	10	1	Water	[H2O]	2.2	Vanadium oxide	[V2O5]	0.7389	/	[/]	0		0	0	0	0	0	0	0	0.0458118	0.753678	1.58937	1.797	2.11104	2.76966	3.69254	6.6576	9.93628	8.11187	5.75723	6.92816	5.74817	3.77392	4.49921	4.22414	2.48042
324	PANI/V2O2	Training	Aniline	[Ani]	0.0044	Ammonium persulfate	[APS]	0.0004	/	[/]	0	Hydrochloric acid	[HCl]	10	1	Water	[H2O]	2.2	Vanadium oxide	[V2O5]	0.7389	/	[/]	0		0	0	0	0	0	0	0	0.0458118	0.753678	1.58937	1.797	2.11104	2.76966	3.69254	6.6576	9.93628	8.11187	5.75723	6.92816	5.74817	3.77392	4.49921	4.22414	2.48042
325	PANI/V2O2	Training	Aniline	[Ani]	0.0044	Ammonium persulfate	[APS]	0.0004	/	[/]	0	Hydrochloric acid	[HCl]	10	1	Water	[H2O]	2.2	Vanadium oxide	[V2O5]	0.7389	/	[/]	0		0	0	0	0	0	0	0	0.0458118	0.753678	1.58937	1.797	2.11104	2.76966	3.69254	6.6576	9.93628	8.11187	5.75723	6.92816	5.74817	3.77392	4.49921	4.22414	2.48042
326	PANI/V2O2	Training	Aniline	[Ani]	0.0044	Ammonium persulfate	[APS]	0.0004	/	[/]	0	Hydrochloric acid	[HCl]	10	1	Water	[H2O]	2.2	Vanadium oxide	[V2O5]	0.7389	/	[/]	0		0	0	0	0	0	0	0	0.0458118	0.753678	1.58937	1.797	2.11104	2.76966	3.69254	6.6576	9.93628	8.11187	5.75723	6.92816	5.74817	3.77392	4.49921	4.22414	2.48042
327	PANI/V2O2	Test	Aniline	[Ani]	0.0044	Ammonium persulfate	[APS]	0.0004	/	[/]	0	Hydrochloric acid	[HCl]	10	1	Water	[H2O]	2.2	Vanadium oxide	[V2O5]	0.7389	/	[/]	0		0	0	0	0	0	0	0	0.0458118	0.753678	1.58937	1.797	2.11104	2.76966	3.69254	6.6576	9.93628	8.11187	5.75723	6.92816	5.74817	3.77392	4.49921	4.22414	2.48042
328	PANI/V2O2	Test	Aniline	[Ani]	0.0044	Ammonium persulfate	[APS]	0.0004	/	[/]	0	Hydrochloric acid	[HCl]	10	1	Water	[H2O]	2.2	Vanadium oxide	[V2O5]	0.7389	/	[/]	0		0	0	0	0	0	0	0	0.0458118	0.753678	1.58937	1.797	2.11104	2.76966	3.69254	6.6576	9.93628	8.11187	5.75723	6.92816	5.74817	3.77392	4.49921	4.22414	2.48042
329	PANI/V2O2	Training	Aniline	[Ani]	0.0044	Ammonium persulfate	[APS]	0.0004	/	[/]	0	Hydrochloric acid	[HCl]	10	1	Water	[H2O]	2.2	Vanadium oxide	[V2O5]	0.7389	/	[/]	0		0	0	0	0	0	0	0	0.0458118	0.753678	1.58937	1.797	2.11104	2.76966	3.69254	6.6576	9.93628	8.11187	5.75723	6.92816	5.74817	3.77392	4.49921	4.22414	2.48042
330	PANI/V2O2	Training	Aniline	[Ani]	0.0044	Ammonium persulfate	[APS]	0.0004	/	[/]	0	Hydrochloric acid	[HCl]	10	1	Water	[H2O]	2.2	Vanadium oxide	[V2O5]	0.7389	/	[/]	0		0	0	0	0	0	0	0	0.0458118	0.753678	1.58937	1.797	2.11104	2.76966	3.69254	6.6576	9.93628	8.11187	5.75723	6.92816	5.74817	3.77392	4.49921	4.22414	2.48042
331	PANI/GO/V2O2	Test	Aniline	[Ani]	0.0044	Ammonium persulfate	[APS]	0.0004	Graphene oxide	[GO]	1	Hydrochloric acid	[HCl]	10	1	Water	[H2O]	2.2	Vanadium oxide	[V2O5]	0.7389	/	[/]	0		0	0	0	0	0	0	0	0.0458118	0.753678	1.58937	1.797	2.11104	2.76966	3.69254	6.6576	9.93628	8.11187	5.75723	6.92816	5.74817	3.77392	4.49921	4.22414	2.48042
332	PANI/GO/V2O2	Training	Aniline	[Ani]	0.0044	Ammonium persulfate	[APS]	0.0004	Graphene oxide	[GO]	1	Hydrochloric acid	[HCl]	10	1	Water	[H2O]	2.2	Vanadium oxide	[V2O5]	0.7389	/	[/]	0		0	0	0	0	0	0	0	0.0458118	0.753678	1.58937	1.797	2.11104	2.76966	3.69254	6.6576	9.93628	8.11187	5.75723	6.92816	5.74817	3.77392	4.49921	4.22414	2.48042
333	PANI/GO/V2O2	Training	Aniline	[Ani]	0.0044	Ammonium persulfate	[APS]	0.0004	Graphene oxide	[GO]	1	Hydrochloric acid	[HCl]	10	1	Water	[H2O]	2.2	Vanadium oxide	[V2O5]	0.7389	/	[/]	0		0	0	0	0	0	0	0	0.0458118	0.753678	1.58937	1.797	2.11104	2.76966	3.69254	6.6576	9.93628	8.11187	5.75723	6.92816	5.74817	3.77392	4.49921	4.22414	2.48042
334	PANI/GO/V2O2	Test	Aniline	[Ani]	0.0044	Ammonium persulfate	[APS]	0.0004	Graphene oxide	[GO]	1	Hydrochloric acid	[HCl]	10	1	Water	[H2O]	2.2	Vanadium oxide	[V2O5]	0.7389	/	[/]	0		0	0	0	0	0	0	0	0.0458118	0.753678	1.58937	1.797	2.11104	2.76966	3.69254	6.6576	9.93628	8.11187	5.75723	6.92816	5.74817	3.77392	4.49921	4.22414	2.48042
335	PANI/GO/V2O2	Training	Aniline	[Ani]	0.0044	Ammonium persulfate	[APS]	0.0004	Graphene oxide	[GO]	1	Hydrochloric acid	[HCl]	10	1	Water	[H2O]	2.2	Vanadium oxide	[V2O5]	0.7389	/	[/]	0		0	0	0	0	0	0	0	0.0458118	0.753678	1.58937	1.797	2.11104	2.76966	3.69254	6.6576	9.93628	8.11187	5.75723	6.92816	5.74817	3.77392	4.49921	4.22414	2.48042
336	PANI/GO/V2O2	Training	Aniline	[Ani]	0.0044	Ammonium persulfate	[APS]	0.0004	Graphene oxide	[GO]	1	Hydrochloric acid	[HCl]	10	1	Water	[H2O]	2.2	Vanadium oxide	[V2O5]	0.7389	/	[/]	0		0	0	0	0	0	0	0	0.0458118	0.753678	1.58937	1.797	2.11104	2.76966	3.69254	6.6576	9.93628	8.11187	5.75723	6.92816	5.74817	3.77392	4.49921	4.22414	2.48042
337	PANI/GO/V2O2	Training	Aniline	[Ani]	0.0044	Ammonium persulfate	[APS]	0.0004	Graphene oxide	[GO]	1	Hydrochloric acid	[HCl]	10	1	Water	[H2O]	2.2	Vanadium oxide	[V2O5]	0.7389	/	[/]	0		0	0	0	0	0	0	0	0.0458118	0.753678	1.58937	1.797	2.11104	2.76966	3.69254	6.6576	9.93628	8.11187	5.75723	6.92816	5.74817	3.77392	4.49921	4.22414	2.48042
338	PANI/GO/V2O2	Training	Aniline	[Ani]	0.0044	Ammonium persulfate	[APS]	0.0004	Graphene oxide	[GO]	1	Hydrochloric acid	[HCl]	10	1	Water	[H2O]	2.2	Vanadium oxide	[V2O5]	0.7389	/	[/]	0		0	0	0	0	0	0	0	0.0458118	0.753678	1.58937	1.797	2.11104	2.76966	3.69254	6.6576	9.93628	8.11187	5.75723	6.92816	5.74817	3.77392	4.49921	4.22414	2.48042
339	PANI	Test	Aniline	[Ani]	0.5	Ammonium persulfate	[APS]	0.5	/	[/]	0	Hydrochloric acid	[HCl]	40	1	/	[/]	0	/	[/]	0	/	[/]	0		0	0	0	0	0	0	0	0	0	0	0	0	0	0	0	0	0	0	0	0	0	0	0	0
340	PANI	Test	Aniline	[Ani]	0.5	Ammonium persulfate	[APS]	0.5	/	[/]	0	Hydrochloric acid	[HCl]	40	1	/	[/]	0	/	[/]	0	/	[/]	0		0	0	0	0	0	0	0	0	0	0	0	0	0	0	0	0	0	0	0	0	0	0	0	0
341	PANI	Training	Aniline	[Ani]	0.5	Ammonium persulfate	[APS]	0.5	/	[/]	0	Hydrochloric acid	[HCl]	40	1	/	[/]	0	/	[/]	0	/	[/]	0		0	0	0	0	0	0	0	0	0	0	0	0	0	0	0	0	0	0	0	0	0	0	0	0
342	PANI	Training	Aniline	[Ani]	0.5	Ammonium persulfate	[APS]	0.5	/	[/]	0	Hydrochloric acid	[HCl]	40	1	/	[/]	0	/	[/]	0	/	[/]	0		0	0	0	0	0	0	0	0	0	0	0	0	0	0	0	0	0	0	0	0	0	0	0	0
343	PANI	Training	Aniline	[Ani]	0.5	Ammonium persulfate	[APS]	0.5	/	[/]	0	Hydrochloric acid	[HCl]	40	1	/	[/]	0	/	[/]	0	/	[/]	0		0	0	0	0	0	0	0	0	0	0	0	0	0	0	0	0	0	0	0	0	0	0	0	0
344	PANI	Training	Aniline	[Ani]	0.5	Ammonium persulfate	[APS]	0.5	/	[/]	0	Hydrochloric acid	[HCl]	40	1	/	[/]	0	/	[/]	0	/	[/]	0		0	0	0	0	0	0	0	0	0	0	0	0	0	0	0	0	0	0	0	0	0	0	0	0
345	PANI	Training	Aniline	[Ani]	0.5	Ammonium persulfate	[APS]	0.5	/	[/]	0	Hydrochloric acid	[HCl]	40	1	/	[/]	0	/	[/]	0	/	[/]	0		0	0	0	0	0	0	0	0	0	0	0	0	0	0	0	0	0	0	0	0	0	0	0	0
346	PANI	Training	Aniline	[Ani]	0.5	Ammonium persulfate	[APS]	0.5	/	[/]	0	Hydrochloric acid	[HCl]	40	1	/	[/]	0	/	[/]	0	/	[/]	0		0	0	0	0	0	0	0	0	0	0	0	0	0	0	0	0	0	0	0	0	0	0	0	0
347	PANI	Test	Aniline	[Ani]	0.5	Ammonium persulfate	[APS]	0.5	/	[/]	0	Hydrochloric acid	[HCl]	40	1	/	[/]	0	/	[/]	0	/	[/]	0		0	0	0	0	0	0	0	0	0	0	0	0	0	0	0	0	0	0	0	0	0	0	0	0
348	PANI	Training	Aniline	[Ani]	0.5	Ammonium persulfate	[APS]	0.5	/	[/]	0	Hydrochloric acid	[HCl]	40	1	/	[/]	0	/	[/]	0	/	[/]	0		0	0	0	0	0	0	0	0	0	0	0	0	0	0	0	0	0	0	0	0	0	0	0	0
349	PANI	Training	Aniline	[Ani]	0.5	Ammonium persulfate	[APS]	0.5	/	[/]	0	Hydrochloric acid	[HCl]	40	1	/	[/]	0	/	[/]	0	/	[/]	0		0	0	0	0	0	0	0	0	0	0	0	0	0	0	0	0	0	0	0	0	0	0	0	0
350	PANI	Training	Aniline	[Ani]	0.5	Ammonium persulfate	[APS]	0.5	/	[/]	0	Hydrochloric acid	[HCl]	40	1	/	[/]	0	/	[/]	0	/	[/]	0		0	0	0	0	0	0	0	0	0	0	0	0	0	0	0	0	0	0	0	0	0	0	0	0
351	PANI	Training	Aniline	[Ani]	0.5	Ammonium persulfate	[APS]	0.5	/	[/]	0	Hydrochloric acid	[HCl]	40	1	/	[/]	0	/	[/]	0	/	[/]	0		0	0	0	0	0	0	0	0	0	0	0	0	0	0	0	0	0	0	0	0	0	0	0	0
352	PANI	Test	Aniline	[Ani]	0.5	Ammonium persulfate	[APS]	0.5	/	[/]	0	Hydrochloric acid	[HCl]	40	1	/	[/]	0	/	[/]	0	/	[/]	0		0	0	0	0	0	0	0	0	0	0	0	0	0	0	0	0	0	0	0	0	0	0	0	0
353	PANI	Training	Aniline	[Ani]	0.5	Ammonium persulfate	[APS]	0.5	/	[/]	0	Hydrochloric acid	[HCl]	40	1	/	[/]	0	/	[/]	0	/	[/]	0		0	0	0	0	0	0	0	0	0	0	0	0	0	0	0	0	0	0	0	0	0	0	0	0
354	PANI	Training	Aniline	[Ani]	0.5	Ammonium persulfate	[APS]	0.5	/	[/]	0	Hydrochloric acid	[HCl]	40	1	/	[/]	0	/	[/]	0	/	[/]	0		0	0	0	0	0	0	0	0	0	0	0	0	0	0	0	0	0	0	0	0	0	0	0	0
355	PANI	Training	Aniline	[Ani]	0.5	Ammonium persulfate	[APS]	0.5	/	[/]	0	Hydrochloric acid	[HCl]	40	1	/	[/]	0	/	[/]	0	/	[/]	0		0	0	0	0	0	0	0	0	0	0	0	0	0	0	0	0	0	0	0	0	0	0	0	0
356	PANI	Training	Aniline	[Ani]	0.5	Ammonium persulfate	[APS]	0.5	/	[/]	0	Hydrochloric acid	[HCl]	40	1	/	[/]	0	/	[/]	0	/	[/]	0		0	0	0	0	0	0	0	0	0	0	0	0	0	0	0	0	0	0	0	0	0	0	0	0
357	PANI	Training	Aniline	[Ani]	0.5	Ammonium persulfate	[APS]	0.5	/	[/]	0	Hydrochloric acid	[HCl]	40	1	/	[/]	0	/	[/]	0	/	[/]	0		0	0	0	0	0	0	0	0	0	0	0	0	0	0	0	0	0	0	0	0	0	0	0	0
358	PANI	Training	Aniline	[Ani]	0.5	Ammonium persulfate	[APS]	0.5	/	[/]	0	Hydrochloric acid	[HCl]	40	1	/	[/]	0	/	[/]	0	/	[/]	0		0	0	0	0	0	0	0	0	0	0	0	0	0	0	0	0	0	0	0	0	0	0	0	0
359	PANI	Test	Aniline	[Ani]	0.5	Ammonium persulfate	[APS]	0.5	/	[/]	0	Hydrochloric acid	[HCl]	40	1	/	[/]	0	/	[/]	0	/	[/]	0		0	0	0	0	0	0	0	0	0	0	0	0	0	0	0	0	0	0	0	0	0	0	0	0
360	PANI	Training	Aniline	[Ani]	0.5	Ammonium persulfate	[APS]	0.5	/	[/]	0	Hydrochloric acid	[HCl]	40	1	/	[/]	0	/	[/]	0	/	[/]	0		0	0	0	0	0	0	0	0	0	0	0	0	0	0	0	0	0	0	0	0	0	0	0	0
361	PANI	Training	Aniline	[Ani]	0.5	Ammonium persulfate	[APS]	0.5	/	[/]	0	Hydrochloric acid	[HCl]	40	1	/	[/]	0	/	[/]	0	/	[/]	0		0	0	0	0	0	0	0	0	0	0	0	0	0	0	0	0	0	0	0	0	0	0	0	0
362	PANI	Test	Aniline	[Ani]	0.5	Ammonium persulfate	[APS]	0.5	/	[/]	0	Hydrochloric acid	[HCl]	40	1	/	[/]	0	/	[/]	0	/	[/]	0		0	0	0	0	0	0	0	0	0	0	0	0	0	0	0	0	0	0	0	0	0	0	0	0
363	PANI	Training	Aniline	[Ani]	0.5	Ammonium persulfate	[APS]	0.5	/	[/]	0	Hydrochloric acid	[HCl]	40	1	/	[/]	0	/	[/]	0	/	[/]	0		0	0	0	0	0	0	0	0	0	0	0	0	0	0	0	0	0	0	0	0	0	0	0	0
364	PANI/Gr	Training	Aniline	[Ani]	0.5	Ammonium persulfate	[APS]	0.5	Graphene	[Gr]	2	Hydrochloric acid	[HCl]	40	1	Dimethyl propylene urea	[C6H12N2O]	0.332	/	[/]	0	/	[/]	0		0	0	0	0	0	0	0	0	0	0	0	0	0	0	0	0	0	0	0	0	0	0	0.137116	1.25396
365	PANI/Gr	Training	Aniline	[Ani]	0.5	Ammonium persulfate	[APS]	0.5	Graphene	[Gr]	2	Hydrochloric acid	[HCl]	40	1	Dimethyl propylene urea	[C6H12N2O]	0.332	/	[/]	0	/	[/]	0		0	0	0	0	0	0	0	0	0	0	0	0	0	0	0	0	0	0	0	0	0	0	0.137116	1.25396
366	PANI/Gr	Training	Aniline	[Ani]	0.5	Ammonium persulfate	[APS]	0.5	Graphene	[Gr]	2	Hydrochloric acid	[HCl]	40	1	Dimethyl propylene urea	[C6H12N2O]	0.332	/	[/]	0	/	[/]	0		0	0	0	0	0	0	0	0	0	0	0	0	0	0	0	0	0	0	0	0	0	0	0.137116	1.25396
367	PANI/Gr	Test	Aniline	[Ani]	0.5	Ammonium persulfate	[APS]	0.5	Graphene	[Gr]	2	Hydrochloric acid	[HCl]	40	1	Dimethyl propylene urea	[C6H12N2O]	0.332	/	[/]	0	/	[/]	0		0	0	0	0	0	0	0	0	0	0	0	0	0	0	0	0	0	0	0	0	0	0	0.137116	1.25396
368	PANI/Gr	Training	Aniline	[Ani]	0.5	Ammonium persulfate	[APS]	0.5	Graphene	[Gr]	2	Hydrochloric acid	[HCl]	40	1	Dimethyl propylene urea	[C6H12N2O]	0.332	/	[/]	0	/	[/]	0		0	0	0	0	0	0	0	0	0	0	0	0	0	0	0	0	0	0	0	0	0	0	0.137116	1.25396
369	PANI/Gr	Training	Aniline	[Ani]	0.5	Ammonium persulfate	[APS]	0.5	Graphene	[Gr]	2	Hydrochloric acid	[HCl]	40	1	Dimethyl propylene urea	[C6H12N2O]	0.332	/	[/]	0	/	[/]	0		0	0	0	0	0	0	0	0	0	0	0	0	0	0	0	0	0	0	0	0	0	0	0.137116	1.25396
370	PANI/Gr	Training	Aniline	[Ani]	0.5	Ammonium persulfate	[APS]	0.5	Graphene	[Gr]	2	Hydrochloric acid	[HCl]	40	1	Dimethyl propylene urea	[C6H12N2O]	0.332	/	[/]	0	/	[/]	0		0	0	0	0	0	0	0	0	0	0	0	0	0	0	0	0	0	0	0	0	0	0	0.137116	1.25396
371	PANI/Gr	Training	Aniline	[Ani]	0.5	Ammonium persulfate	[APS]	0.5	Graphene	[Gr]	2	Hydrochloric acid	[HCl]	40	1	Dimethyl propylene urea	[C6H12N2O]	0.332	/	[/]	0	/	[/]	0		0	0	0	0	0	0	0	0	0	0	0	0	0	0	0	0	0	0	0	0	0	0	0.137116	1.25396
372	PANI/Gr	Training	Aniline	[Ani]	0.5	Ammonium persulfate	[APS]	0.5	Graphene	[Gr]	2	Hydrochloric acid	[HCl]	40	1	Dimethyl propylene urea	[C6H12N2O]	0.332	/	[/]	0	/	[/]	0		0	0	0	0	0	0	0	0	0	0	0	0	0	0	0	0	0	0	0	0	0	0	0.137116	1.25396
373	PANI/Gr	Test	Aniline	[Ani]	0.5	Ammonium persulfate	[APS]	0.5	Graphene	[Gr]	2	Hydrochloric acid	[HCl]	40	1	Dimethyl propylene urea	[C6H12N2O]	0.332	/	[/]	0	/	[/]	0		0	0	0	0	0	0	0	0	0	0	0	0	0	0	0	0	0	0	0	0	0	0	0.137116	1.25396
374	PANI/Gr	Training	Aniline	[Ani]	0.5	Ammonium persulfate	[APS]	0.5	Graphene	[Gr]	2	Hydrochloric acid	[HCl]	40	1	Dimethyl propylene urea	[C6H12N2O]	0.332	/	[/]	0	/	[/]	0		0	0	0	0	0	0	0	0	0	0	0	0	0	0	0	0	0	0	0	0	0	0	0.137116	1.25396
375	PANI/Gr	Test	Aniline	[Ani]	0.5	Ammonium persulfate	[APS]	0.5	Graphene	[Gr]	2	Hydrochloric acid	[HCl]	40	1	Dimethyl propylene urea	[C6H12N2O]	0.332	/	[/]	0	/	[/]	0		0	0	0	0	0	0	0	0	0	0	0	0	0	0	0	0	0	0	0	0	0	0	0.137116	1.25396
376	PANI/Gr	Training	Aniline	[Ani]	0.5	Ammonium persulfate	[APS]	0.5	Graphene	[Gr]	2	Hydrochloric acid	[HCl]	40	1	Dimethyl propylene urea	[C6H12N2O]	0.332	/	[/]	0	/	[/]	0		0	0	0	0	0	0	0	0	0	0	0	0	0	0	0	0	0	0	0	0	0	0	0.137116	1.25396
377	PANI/Gr	Training	Aniline	[Ani]	0.5	Ammonium persulfate	[APS]	0.5	Graphene	[Gr]	2	Hydrochloric acid	[HCl]	40	1	Dimethyl propylene urea	[C6H12N2O]	0.332	/	[/]	0	/	[/]	0		0	0	0	0	0	0	0	0	0	0	0	0	0	0	0	0	0	0	0	0	0	0	0.137116	1.25396
378	PANI/Gr	Training	Aniline	[Ani]	0.5	Ammonium persulfate	[APS]	0.5	Graphene	[Gr]	2	Hydrochloric acid	[HCl]	40	1	Dimethyl propylene urea	[C6H12N2O]	0.332	/	[/]	0	/	[/]	0		0	0	0	0	0	0	0	0	0	0	0	0	0	0	0	0	0	0	0	0	0	0	0.137116	1.25396
379	PANI/Gr	Training	Aniline	[Ani]	0.5	Ammonium persulfate	[APS]	0.5	Graphene	[Gr]	2	Hydrochloric acid	[HCl]	40	1	Dimethyl propylene urea	[C6H12N2O]	0.332	/	[/]	0	/	[/]	0		0	0	0	0	0	0	0	0	0	0	0	0	0	0	0	0	0	0	0	0	0	0	0.137116	1.25396
380	PANI/Gr	Training	Aniline	[Ani]	0.5	Ammonium persulfate	[APS]	0.5	Graphene	[Gr]	2	Hydrochloric acid	[HCl]	40	1	Dimethyl propylene urea	[C6H12N2O]	0.332	/	[/]	0	/	[/]	0		0	0	0	0	0	0	0	0	0	0	0	0	0	0	0	0	0	0	0	0	0	0	0.137116	1.25396
381	PANI/Gr	Training	Aniline	[Ani]	0.5	Ammonium persulfate	[APS]	0.5	Graphene	[Gr]	2	Hydrochloric acid	[HCl]	40	1	Dimethyl propylene urea	[C6H12N2O]	0.332	/	[/]	0	/	[/]	0		0	0	0	0	0	0	0	0	0	0	0	0	0	0	0	0	0	0	0	0	0	0	0.137116	1.25396
382	PANI/Gr	Test	Aniline	[Ani]	0.5	Ammonium persulfate	[APS]	0.5	Graphene	[Gr]	2	Hydrochloric acid	[HCl]	40	1	Dimethyl propylene urea	[C6H12N2O]	0.332	/	[/]	0	/	[/]	0		0	0	0	0	0	0	0	0	0	0	0	0	0	0	0	0	0	0	0	0	0	0	0.137116	1.25396
383	PANI/Gr	Training	Aniline	[Ani]	0.5	Ammonium persulfate	[APS]	0.5	Graphene	[Gr]	2	Hydrochloric acid	[HCl]	40	1	Dimethyl propylene urea	[C6H12N2O]	0.332	/	[/]	0	/	[/]	0		0	0	0	0	0	0	0	0	0	0	0	0	0	0	0	0	0	0	0	0	0	0	0.137116	1.25396
384	PANI/Gr	Test	Aniline	[Ani]	0.5	Ammonium persulfate	[APS]	0.5	Graphene	[Gr]	2	Hydrochloric acid	[HCl]	40	1	Dimethyl propylene urea	[C6H12N2O]	0.332	/	[/]	0	/	[/]	0		0	0	0	0	0	0	0	0	0	0	0	0	0	0	0	0	0	0	0	0	0	0	0.137116	1.25396
385	PANI/Gr	Training	Aniline	[Ani]	0.5	Ammonium persulfate	[APS]	0.5	Graphene	[Gr]	2	Hydrochloric acid	[HCl]	40	1	Dimethyl propylene urea	[C6H12N2O]	0.332	/	[/]	0	/	[/]	0		0	0	0	0	0	0	0	0	0	0	0	0	0	0	0	0	0	0	0	0	0	0	0.137116	1.25396
386	PANI/Gr	Test	Aniline	[Ani]	0.5	Ammonium persulfate	[APS]	0.5	Graphene	[Gr]	2	Hydrochloric acid	[HCl]	40	1	Dimethyl propylene urea	[C6H12N2O]	0.332	/	[/]	0	/	[/]	0		0	0	0	0	0	0	0	0	0	0	0	0	0	0	0	0	0	0	0	0	0	0	0.137116	1.25396
387	PANI/Gr	Training	Aniline	[Ani]	0.5	Ammonium persulfate	[APS]	0.5	Graphene	[Gr]	2	Hydrochloric acid	[HCl]	40	1	Dimethyl propylene urea	[C6H12N2O]	0.332	/	[/]	0	/	[/]	0		0	0	0	0	0	0	0	0	0	0	0	0	0	0	0	0	0	0	0	0	0	0	0.137116	1.25396
388	PANI/Gr	Training	Aniline	[Ani]	0.5	Ammonium persulfate	[APS]	0.5	Graphene	[Gr]	2	Hydrochloric acid	[HCl]	40	1	Dimethyl propylene urea	[C6H12N2O]	0.332	/	[/]	0	/	[/]	0		0	0	0	0	0	0	0	0	0	0	0	0	0	0	0	0	0	0	0	0	0	0	0.137116	1.25396
389	PANI/Gr	Training	Aniline	[Ani]	0.5	Ammonium persulfate	[APS]	0.5	Graphene	[Gr]	2	Hydrochloric acid	[HCl]	40	1	Dimethyl propylene urea	[C6H12N2O]	0.332	/	[/]	0	/	[/]	0		0	0	0	0	0	0	0	0	0	0	0	0	0	0	0	0	0	0	0	0	0	0	0.137116	1.25396
390	PANI/Gr	Training	Aniline	[Ani]	0.5	Ammonium persulfate	[APS]	0.5	Graphene	[Gr]	2	Hydrochloric acid	[HCl]	40	1	Dimethyl propylene urea	[C6H12N2O]	0.332	/	[/]	0	/	[/]	0		0	0	0	0	0	0	0	0	0	0	0	0	0	0	0	0	0	0	0	0	0	0	0.137116	1.25396
391	PANI/Gr	Training	Aniline	[Ani]	0.5	Ammonium persulfate	[APS]	0.5	Graphene	[Gr]	2	Hydrochloric acid	[HCl]	40	1	Dimethyl propylene urea	[C6H12N2O]	0.332	/	[/]	0	/	[/]	0		0	0	0	0	0	0	0	0	0	0	0	0	0	0	0	0	0	0	0	0	0	0	0.137116	1.25396
392	PANI/Gr	Training	Aniline	[Ani]	0.5	Ammonium persulfate	[APS]	0.5	Graphene	[Gr]	2	Hydrochloric acid	[HCl]	40	1	Dimethyl propylene urea	[C6H12N2O]	0.332	/	[/]	0	/	[/]	0		0	0	0	0	0	0	0	0	0	0	0	0	0	0	0	0	0	0	0	0	0	0	0.137116	1.25396
393	PANI/Gr	Training	Aniline	[Ani]	0.5	Ammonium persulfate	[APS]	0.5	Graphene	[Gr]	4	Hydrochloric acid	[HCl]	40	1	Dimethyl propylene urea	[C6H12N2O]	0.332	/	[/]	0	/	[/]	0		0	0	0	0	0	0	0	0	0	0	0	0	0	0	0	0	0	0	0	0	0	0	0.137116	1.25396
394	PANI/Gr	Training	Aniline	[Ani]	0.5	Ammonium persulfate	[APS]	0.5	Graphene	[Gr]	4	Hydrochloric acid	[HCl]	40	1	Dimethyl propylene urea	[C6H12N2O]	0.332	/	[/]	0	/	[/]	0		0	0	0	0	0	0	0	0	0	0	0	0	0	0	0	0	0	0	0	0	0	0	0.137116	1.25396
395	PANI/Gr	Training	Aniline	[Ani]	0.5	Ammonium persulfate	[APS]	0.5	Graphene	[Gr]	4	Hydrochloric acid	[HCl]	40	1	Dimethyl propylene urea	[C6H12N2O]	0.332	/	[/]	0	/	[/]	0		0	0	0	0	0	0	0	0	0	0	0	0	0	0	0	0	0	0	0	0	0	0	0.137116	1.25396
396	PANI/Gr	Training	Aniline	[Ani]	0.5	Ammonium persulfate	[APS]	0.5	Graphene	[Gr]	4	Hydrochloric acid	[HCl]	40	1	Dimethyl propylene urea	[C6H12N2O]	0.332	/	[/]	0	/	[/]	0		0	0	0	0	0	0	0	0	0	0	0	0	0	0	0	0	0	0	0	0	0	0	0.137116	1.25396
397	PANI/Gr	Training	Aniline	[Ani]	0.5	Ammonium persulfate	[APS]	0.5	Graphene	[Gr]	4	Hydrochloric acid	[HCl]	40	1	Dimethyl propylene urea	[C6H12N2O]	0.332	/	[/]	0	/	[/]	0		0	0	0	0	0	0	0	0	0	0	0	0	0	0	0	0	0	0	0	0	0	0	0.137116	1.25396
398	PANI/Gr	Training	Aniline	[Ani]	0.5	Ammonium persulfate	[APS]	0.5	Graphene	[Gr]	4	Hydrochloric acid	[HCl]	40	1	Dimethyl propylene urea	[C6H12N2O]	0.332	/	[/]	0	/	[/]	0		0	0	0	0	0	0	0	0	0	0	0	0	0	0	0	0	0	0	0	0	0	0	0.137116	1.25396
399	PANI/Gr	Training	Aniline	[Ani]	0.5	Ammonium persulfate	[APS]	0.5	Graphene	[Gr]	4	Hydrochloric acid	[HCl]	40	1	Dimethyl propylene urea	[C6H12N2O]	0.332	/	[/]	0	/	[/]	0		0	0	0	0	0	0	0	0	0	0	0	0	0	0	0	0	0	0	0	0	0	0	0.137116	1.25396
400	PANI/Gr	Training	Aniline	[Ani]	0.5	Ammonium persulfate	[APS]	0.5	Graphene	[Gr]	4	Hydrochloric acid	[HCl]	40	1	Dimethyl propylene urea	[C6H12N2O]	0.332	/	[/]	0	/	[/]	0		0	0	0	0	0	0	0	0	0	0	0	0	0	0	0	0	0	0	0	0	0	0	0.137116	1.25396
401	PANI/Gr	Training	Aniline	[Ani]	0.5	Ammonium persulfate	[APS]	0.5	Graphene	[Gr]	4	Hydrochloric acid	[HCl]	40	1	Dimethyl propylene urea	[C6H12N2O]	0.332	/	[/]	0	/	[/]	0		0	0	0	0	0	0	0	0	0	0	0	0	0	0	0	0	0	0	0	0	0	0	0.137116	1.25396
402	PANI/Gr	Training	Aniline	[Ani]	0.5	Ammonium persulfate	[APS]	0.5	Graphene	[Gr]	4	Hydrochloric acid	[HCl]	40	1	Dimethyl propylene urea	[C6H12N2O]	0.332	/	[/]	0	/	[/]	0		0	0	0	0	0	0	0	0	0	0	0	0	0	0	0	0	0	0	0	0	0	0	0.137116	1.25396
403	PANI/Gr	Training	Aniline	[Ani]	0.5	Ammonium persulfate	[APS]	0.5	Graphene	[Gr]	4	Hydrochloric acid	[HCl]	40	1	Dimethyl propylene urea	[C6H12N2O]	0.332	/	[/]	0	/	[/]	0		0	0	0	0	0	0	0	0	0	0	0	0	0	0	0	0	0	0	0	0	0	0	0.137116	1.25396
404	PANI/Gr	Test	Aniline	[Ani]	0.5	Ammonium persulfate	[APS]	0.5	Graphene	[Gr]	4	Hydrochloric acid	[HCl]	40	1	Dimethyl propylene urea	[C6H12N2O]	0.332	/	[/]	0	/	[/]	0		0	0	0	0	0	0	0	0	0	0	0	0	0	0	0	0	0	0	0	0	0	0	0.137116	1.25396
405	PANI/Gr	Training	Aniline	[Ani]	0.5	Ammonium persulfate	[APS]	0.5	Graphene	[Gr]	4	Hydrochloric acid	[HCl]	40	1	Dimethyl propylene urea	[C6H12N2O]	0.332	/	[/]	0	/	[/]	0		0	0	0	0	0	0	0	0	0	0	0	0	0	0	0	0	0	0	0	0	0	0	0.137116	1.25396
406	PANI/Gr	Training	Aniline	[Ani]	0.5	Ammonium persulfate	[APS]	0.5	Graphene	[Gr]	4	Hydrochloric acid	[HCl]	40	1	Dimethyl propylene urea	[C6H12N2O]	0.332	/	[/]	0	/	[/]	0		0	0	0	0	0	0	0	0	0	0	0	0	0	0	0	0	0	0	0	0	0	0	0.137116	1.25396
407	PANI/Gr	Training	Aniline	[Ani]	0.5	Ammonium persulfate	[APS]	0.5	Graphene	[Gr]	4	Hydrochloric acid	[HCl]	40	1	Dimethyl propylene urea	[C6H12N2O]	0.332	/	[/]	0	/	[/]	0		0	0	0	0	0	0	0	0	0	0	0	0	0	0	0	0	0	0	0	0	0	0	0.137116	1.25396
408	PANI/Gr	Training	Aniline	[Ani]	0.5	Ammonium persulfate	[APS]	0.5	Graphene	[Gr]	4	Hydrochloric acid	[HCl]	40	1	Dimethyl propylene urea	[C6H12N2O]	0.332	/	[/]	0	/	[/]	0		0	0	0	0	0	0	0	0	0	0	0	0	0	0	0	0	0	0	0	0	0	0	0.137116	1.25396
409	PANI/Gr	Training	Aniline	[Ani]	0.5	Ammonium persulfate	[APS]	0.5	Graphene	[Gr]	4	Hydrochloric acid	[HCl]	40	1	Dimethyl propylene urea	[C6H12N2O]	0.332	/	[/]	0	/	[/]	0		0	0	0	0	0	0	0	0	0	0	0	0	0	0	0	0	0	0	0	0	0	0	0.137116	1.25396
410	PANI/Gr	Training	Aniline	[Ani]	0.5	Ammonium persulfate	[APS]	0.5	Graphene	[Gr]	4	Hydrochloric acid	[HCl]	40	1	Dimethyl propylene urea	[C6H12N2O]	0.332	/	[/]	0	/	[/]	0		0	0	0	0	0	0	0	0	0	0	0	0	0	0	0	0	0	0	0	0	0	0	0.137116	1.25396
411	PANI/Gr	Training	Aniline	[Ani]	0.5	Ammonium persulfate	[APS]	0.5	Graphene	[Gr]	4	Hydrochloric acid	[HCl]	40	1	Dimethyl propylene urea	[C6H12N2O]	0.332	/	[/]	0	/	[/]	0		0	0	0	0	0	0	0	0	0	0	0	0	0	0	0	0	0	0	0	0	0	0	0.137116	1.25396
412	PANI/Gr	Training	Aniline	[Ani]	0.5	Ammonium persulfate	[APS]	0.5	Graphene	[Gr]	4	Hydrochloric acid	[HCl]	40	1	Dimethyl propylene urea	[C6H12N2O]	0.332	/	[/]	0	/	[/]	0		0	0	0	0	0	0	0	0	0	0	0	0	0	0	0	0	0	0	0	0	0	0	0.137116	1.25396
413	PANI/Gr	Training	Aniline	[Ani]	0.5	Ammonium persulfate	[APS]	0.5	Graphene	[Gr]	4	Hydrochloric acid	[HCl]	40	1	Dimethyl propylene urea	[C6H12N2O]	0.332	/	[/]	0	/	[/]	0		0	0	0	0	0	0	0	0	0	0	0	0	0	0	0	0	0	0	0	0	0	0	0.137116	1.25396
414	PANI/Gr	Training	Aniline	[Ani]	0.5	Ammonium persulfate	[APS]	0.5	Graphene	[Gr]	4	Hydrochloric acid	[HCl]	40	1	Dimethyl propylene urea	[C6H12N2O]	0.332	/	[/]	0	/	[/]	0		0	0	0	0	0	0	0	0	0	0	0	0	0	0	0	0	0	0	0	0	0	0	0.137116	1.25396
415	PANI/Gr	Training	Aniline	[Ani]	0.5	Ammonium persulfate	[APS]	0.5	Graphene	[Gr]	4	Hydrochloric acid	[HCl]	40	1	Dimethyl propylene urea	[C6H12N2O]	0.332	/	[/]	0	/	[/]	0		0	0	0	0	0	0	0	0	0	0	0	0	0	0	0	0	0	0	0	0	0	0	0.137116	1.25396
416	PANI/Gr	Test	Aniline	[Ani]	0.5	Ammonium persulfate	[APS]	0.5	Graphene	[Gr]	4	Hydrochloric acid	[HCl]	40	1	Dimethyl propylene urea	[C6H12N2O]	0.332	/	[/]	0	/	[/]	0		0	0	0	0	0	0	0	0	0	0	0	0	0	0	0	0	0	0	0	0	0	0	0.137116	1.25396
417	PANI/Gr	Training	Aniline	[Ani]	0.5	Ammonium persulfate	[APS]	0.5	Graphene	[Gr]	4	Hydrochloric acid	[HCl]	40	1	Dimethyl propylene urea	[C6H12N2O]	0.332	/	[/]	0	/	[/]	0		0	0	0	0	0	0	0	0	0	0	0	0	0	0	0	0	0	0	0	0	0	0	0.137116	1.25396
418	PANI/Gr	Test	Aniline	[Ani]	0.5	Ammonium persulfate	[APS]	0.5	Graphene	[Gr]	4	Hydrochloric acid	[HCl]	40	1	Dimethyl propylene urea	[C6H12N2O]	0.332	/	[/]	0	/	[/]	0		0	0	0	0	0	0	0	0	0	0	0	0	0	0	0	0	0	0	0	0	0	0	0.137116	1.25396
419	PANI/Gr	Training	Aniline	[Ani]	0.5	Ammonium persulfate	[APS]	0.5	Graphene	[Gr]	4	Hydrochloric acid	[HCl]	40	1	Dimethyl propylene urea	[C6H12N2O]	0.332	/	[/]	0	/	[/]	0		0	0	0	0	0	0	0	0	0	0	0	0	0	0	0	0	0	0	0	0	0	0	0.137116	1.25396
420	PANI/Gr	Training	Aniline	[Ani]	0.5	Ammonium persulfate	[APS]	0.5	Graphene	[Gr]	4	Hydrochloric acid	[HCl]	40	1	Dimethyl propylene urea	[C6H12N2O]	0.332	/	[/]	0	/	[/]	0		0	0	0	0	0	0	0	0	0	0	0	0	0	0	0	0	0	0	0	0	0	0	0.137116	1.25396
481	PANI/Gr	Test	Aniline	[Ani]	0.5	Ammonium persulfate	[APS]	0.5	Graphene	[Gr]	8	Hydrochloric acid	[HCl]	40	1	Dimethyl propylene urea	[C6H12N2O]	0.332	/	[/]	0	/	[/]	0		0	0	0	0	0	0	0	0	0	0	0	0	0	0	0	0	0	0	0	0	0	0	0.137116	1.25396
482	PANI/Gr	Training	Aniline	[Ani]	0.5	Ammonium persulfate	[APS]	0.5	Graphene	[Gr]	8	Hydrochloric acid	[HCl]	40	1	Dimethyl propylene urea	[C6H12N2O]	0.332	/	[/]	0	/	[/]	0		0	0	0	0	0	0	0	0	0	0	0	0	0	0	0	0	0	0	0	0	0	0	0.137116	1.25396
483	PANI/Gr	Training	Aniline	[Ani]	0.5	Ammonium persulfate	[APS]	0.5	Graphene	[Gr]	8	Hydrochloric acid	[HCl]	40	1	Dimethyl propylene urea	[C6H12N2O]	0.332	/	[/]	0	/	[/]	0		0	0	0	0	0	0	0	0	0	0	0	0	0	0	0	0	0	0	0	0	0	0	0.137116	1.25396
484	PANI/Gr	Test	Aniline	[Ani]	0.5	Ammonium persulfate	[APS]	0.5	Graphene	[Gr]	8	Hydrochloric acid	[HCl]	40	1	Dimethyl propylene urea	[C6H12N2O]	0.332	/	[/]	0	/	[/]	0		0	0	0	0	0	0	0	0	0	0	0	0	0	0	0	0	0	0	0	0	0	0	0.137116	1.25396
485	PANI/Gr	Training	Aniline	[Ani]	0.5	Ammonium persulfate	[APS]	0.5	Graphene	[Gr]	8	Hydrochloric acid	[HCl]	40	1	Dimethyl propylene urea	[C6H12N2O]	0.332	/	[/]	0	/	[/]	0		0	0	0	0	0	0	0	0	0	0	0	0	0	0	0	0	0	0	0	0	0	0	0.137116	1.25396
486	PANI/Gr	Training	Aniline	[Ani]	0.5	Ammonium persulfate	[APS]	0.5	Graphene	[Gr]	8	Hydrochloric acid	[HCl]	40	1	Dimethyl propylene urea	[C6H12N2O]	0.332	/	[/]	0	/	[/]	0		0	0	0	0	0	0	0	0	0	0	0	0	0	0	0	0	0	0	0	0	0	0	0.137116	1.25396
487	PANI/Gr	Training	Aniline	[Ani]	0.5	Ammonium persulfate	[APS]	0.5	Graphene	[Gr]	8	Hydrochloric acid	[HCl]	40	1	Dimethyl propylene urea	[C6H12N2O]	0.332	/	[/]	0	/	[/]	0		0	0	0	0	0	0	0	0	0	0	0	0	0	0	0	0	0	0	0	0	0	0	0.137116	1.25396
488	PANI/Gr	Test	Aniline	[Ani]	0.5	Ammonium persulfate	[APS]	0.5	Graphene	[Gr]	8	Hydrochloric acid	[HCl]	40	1	Dimethyl propylene urea	[C6H12N2O]	0.332	/	[/]	0	/	[/]	0		0	0	0	0	0	0	0	0	0	0	0	0	0	0	0	0	0	0	0	0	0	0	0.137116	1.25396
489	PANI/Gr	Training	Aniline	[Ani]	0.5	Ammonium persulfate	[APS]	0.5	Graphene	[Gr]	8	Hydrochloric acid	[HCl]	40	1	Dimethyl propylene urea	[C6H12N2O]	0.332	/	[/]	0	/	[/]	0		0	0	0	0	0	0	0	0	0	0	0	0	0	0	0	0	0	0	0	0	0	0	0.137116	1.25396
490	PANI/Gr	Training	Aniline	[Ani]	0.5	Ammonium persulfate	[APS]	0.5	Graphene	[Gr]	8	Hydrochloric acid	[HCl]	40	1	Dimethyl propylene urea	[C6H12N2O]	0.332	/	[/]	0	/	[/]	0		0	0	0	0	0	0	0	0	0	0	0	0	0	0	0	0	0	0	0	0	0	0	0.137116	1.25396
491	PANI/Gr	Test	Aniline	[Ani]	0.5	Ammonium persulfate	[APS]	0.5	Graphene	[Gr]	8	Hydrochloric acid	[HCl]	40	1	Dimethyl propylene urea	[C6H12N2O]	0.332	/	[/]	0	/	[/]	0		0	0	0	0	0	0	0	0	0	0	0	0	0	0	0	0	0	0	0	0	0	0	0.137116	1.25396
492	PANI/Gr	Test	Aniline	[Ani]	0.5	Ammonium persulfate	[APS]	0.5	Graphene	[Gr]	8	Hydrochloric acid	[HCl]	40	1	Dimethyl propylene urea	[C6H12N2O]	0.332	/	[/]	0	/	[/]	0		0	0	0	0	0	0	0	0	0	0	0	0	0	0	0	0	0	0	0	0	0	0	0.137116	1.25396
493	PANI/Gr	Training	Aniline	[Ani]	0.5	Ammonium persulfate	[APS]	0.5	Graphene	[Gr]	8	Hydrochloric acid	[HCl]	40	1	Dimethyl propylene urea	[C6H12N2O]	0.332	/	[/]	0	/	[/]	0		0	0	0	0	0	0	0	0	0	0	0	0	0	0	0	0	0	0	0	0	0	0	0.137116	1.25396
494	PANI/Gr	Training	Aniline	[Ani]	0.5	Ammonium persulfate	[APS]	0.5	Graphene	[Gr]	8	Hydrochloric acid	[HCl]	40	1	Dimethyl propylene urea	[C6H12N2O]	0.332	/	[/]	0	/	[/]	0		0	0	0	0	0	0	0	0	0	0	0	0	0	0	0	0	0	0	0	0	0	0	0.137116	1.25396
495	PANI/Gr	Training	Aniline	[Ani]	0.5	Ammonium persulfate	[APS]	0.5	Graphene	[Gr]	8	Hydrochloric acid	[HCl]	40	1	Dimethyl propylene urea	[C6H12N2O]	0.332	/	[/]	0	/	[/]	0		0	0	0	0	0	0	0	0	0	0	0	0	0	0	0	0	0	0	0	0	0	0	0.137116	1.25396
496	PANI/Gr	Training	Aniline	[Ani]	0.5	Ammonium persulfate	[APS]	0.5	Graphene	[Gr]	8	Hydrochloric acid	[HCl]	40	1	Dimethyl propylene urea	[C6H12N2O]	0.332	/	[/]	0	/	[/]	0		0	0	0	0	0	0	0	0	0	0	0	0	0	0	0	0	0	0	0	0	0	0	0.137116	1.25396
497	PANI/Gr	Training	Aniline	[Ani]	0.5	Ammonium persulfate	[APS]	0.5	Graphene	[Gr]	8	Hydrochloric acid	[HCl]	40	1	Dimethyl propylene urea	[C6H12N2O]	0.332	/	[/]	0	/	[/]	0		0	0	0	0	0	0	0	0	0	0	0	0	0	0	0	0	0	0	0	0	0	0	0.137116	1.25396
498	PANI/Gr	Training	Aniline	[Ani]	0.5	Ammonium persulfate	[APS]	0.5	Graphene	[Gr]	8	Hydrochloric acid	[HCl]	40	1	Dimethyl propylene urea	[C6H12N2O]	0.332	/	[/]	0	/	[/]	0		0	0	0	0	0	0	0	0	0	0	0	0	0	0	0	0	0	0	0	0	0	0	0.137116	1.25396
499	PANI/Gr	Training	Aniline	[Ani]	0.5	Ammonium persulfate	[APS]	0.5	Graphene	[Gr]	8	Hydrochloric acid	[HCl]	40	1	Dimethyl propylene urea	[C6H12N2O]	0.332	/	[/]	0	/	[/]	0		0	0	0	0	0	0	0	0	0	0	0	0	0	0	0	0	0	0	0	0	0	0	0.137116	1.25396
500	PANI/Gr	Training	Aniline	[Ani]	0.5	Ammonium persulfate	[APS]	0.5	Graphene	[Gr]	8	Hydrochloric acid	[HCl]	40	1	Dimethyl propylene urea	[C6H12N2O]	0.332	/	[/]	0	/	[/]	0		0	0	0	0	0	0	0	0	0	0	0	0	0	0	0	0	0	0	0	0	0	0	0.137116	1.25396
501	PANI/Gr	Training	Aniline	[Ani]	0.5	Ammonium persulfate	[APS]	0.5	Graphene	[Gr]	8	Hydrochloric acid	[HCl]	40	1	Dimethyl propylene urea	[C6H12N2O]	0.332	/	[/]	0	/	[/]	0		0	0	0	0	0	0	0	0	0	0	0	0	0	0	0	0	0	0	0	0	0	0	0.137116	1.25396
502	PANI/Gr	Training	Aniline	[Ani]	0.5	Ammonium persulfate	[APS]	0.5	Graphene	[Gr]	8	Hydrochloric acid	[HCl]	40	1	Dimethyl propylene urea	[C6H12N2O]	0.332	/	[/]	0	/	[/]	0		0	0	0	0	0	0	0	0	0	0	0	0	0	0	0	0	0	0	0	0	0	0	0.137116	1.25396
503	PANI/Gr	Training	Aniline	[Ani]	0.5	Ammonium persulfate	[APS]	0.5	Graphene	[Gr]	8	Hydrochloric acid	[HCl]	40	1	Dimethyl propylene urea	[C6H12N2O]	0.332	/	[/]	0	/	[/]	0		0	0	0	0	0	0	0	0	0	0	0	0	0	0	0	0	0	0	0	0	0	0	0.137116	1.25396
504	PANI/Gr	Training	Aniline	[Ani]	0.5	Ammonium persulfate	[APS]	0.5	Graphene	[Gr]	8	Hydrochloric acid	[HCl]	40	1	Dimethyl propylene urea	[C6H12N2O]	0.332	/	[/]	0	/	[/]	0		0	0	0	0	0	0	0	0	0	0	0	0	0	0	0	0	0	0	0	0	0	0	0.137116	1.25396
505	PANI/Gr	Test	Aniline	[Ani]	0.5	Ammonium persulfate	[APS]	0.5	Graphene	[Gr]	8	Hydrochloric acid	[HCl]	40	1	Dimethyl propylene urea	[C6H12N2O]	0.332	/	[/]	0	/	[/]	0		0	0	0	0	0	0	0	0	0	0	0	0	0	0	0	0	0	0	0	0	0	0	0.137116	1.25396
506	PANI/Gr	Training	Aniline	[Ani]	0.5	Ammonium persulfate	[APS]	0.5	Graphene	[Gr]	8	Hydrochloric acid	[HCl]	40	1	Dimethyl propylene urea	[C6H12N2O]	0.332	/	[/]	0	/	[/]	0		0	0	0	0	0	0	0	0	0	0	0	0	0	0	0	0	0	0	0	0	0	0	0.137116	1.25396
507	PANI/Gr	Test	Aniline	[Ani]	0.5	Ammonium persulfate	[APS]	0.5	Graphene	[Gr]	8	Hydrochloric acid	[HCl]	40	1	Dimethyl propylene urea	[C6H12N2O]	0.332	/	[/]	0	/	[/]	0		0	0	0	0	0	0	0	0	0	0	0	0	0	0	0	0	0	0	0	0	0	0	0.137116	1.25396
508	PANI/Gr	Training	Aniline	[Ani]	0.5	Ammonium persulfate	[APS]	0.5	Graphene	[Gr]	8	Hydrochloric acid	[HCl]	40	1	Dimethyl propylene urea	[C6H12N2O]	0.332	/	[/]	0	/	[/]	0		0	0	0	0	0	0	0	0	0	0	0	0	0	0	0	0	0	0	0	0	0	0	0.137116	1.25396
509	PANI/Gr	Training	Aniline	[Ani]	0.5	Ammonium persulfate	[APS]	0.5	Graphene	[Gr]	8	Hydrochloric acid	[HCl]	40	1	Dimethyl propylene urea	[C6H12N2O]	0.332	/	[/]	0	/	[/]	0		0	0	0	0	0	0	0	0	0	0	0	0	0	0	0	0	0	0	0	0	0	0	0.137116	1.25396
510	PANI	Training	Aniline	[Ani]	0.0002	Ammonium persulfate	[APS]	0.0002	/	[/]	0	Hydrochloric acid	[HCl]	30	1	/	[/]	0	/	[/]	0	/	[/]	0		0	0	0	0	0	0	0	0	0	0	0	0	0	0	0	0	0	0	0	0	0	0	0	0
511	PANI/GO	Training	Aniline	[Ani]	0.011	Ammonium persulfate	[APS]	0.011	Graphene oxide	[GO]	10	Hydrochloric acid	[HCl]	80	1	/	[/]	0	/	[/]	0	/	[/]	0		0	0	0	0	0	0	0	0	0	0	0	0	0	0	0	0	0	0	0	0	0	0	0	0
512	PANI/V2O2	Training	Aniline	[Ani]	0.0044	Ammonium persulfate	[APS]	0.0004	/	[/]	0	Hydrochloric acid	[HCl]	10	1	Water	[H2O]	2.2	Vanadium oxide	[V2O5]	0.7389	/	[/]	0		0	0	0	0	0	0	0	0.0458118	0.753678	1.58937	1.797	2.11104	2.76966	3.69254	6.6576	9.93628	8.11187	5.75723	6.92816	5.74817	3.77392	4.49921	4.22414	2.48042
513	PANI/GO/V2O2	Test	Aniline	[Ani]	0.0044	Ammonium persulfate	[APS]	0.0004	Graphene oxide	[GO]	1	Hydrochloric acid	[HCl]	10	1	Water	[H2O]	2.2	Vanadium oxide	[V2O5]	0.7389	/	[/]	0		0	0	0	0	0	0	0	0.0458118	0.753678	1.58937	1.797	2.11104	2.76966	3.69254	6.6576	9.93628	8.11187	5.75723	6.92816	5.74817	3.77392	4.49921	4.22414	2.48042
660	PANI	Test	Aniline	[Ani]	0.1	Ammonium persulfate	[APS]	0.1	/	[/]	0	Hydrochloric acid	[HCl]	100	1	Water	[H2O]	11.11	Acetone	[C3H6O]	2.6997	Dimethylformamide	[C3H7NO]	2.5831		0	0	0	0	0	0	0	0	0	0	0	0	1.29987	6.71044	21.5534	34.7076	27.375	18.8648	23.9309	19.9939	12.447	17.6838	27.7844	44.3396
661	PANI	Training	Aniline	[Ani]	0.1	Ammonium persulfate	[APS]	0.1	/	[/]	0	Hydrochloric acid	[HCl]	100	1	Water	[H2O]	11.11	Acetone	[C3H6O]	2.6997	Dimethylformamide	[C3H7NO]	2.5831		0	0	0	0	0	0	0	0	0	0	0	0	1.29987	6.71044	21.5534	34.7076	27.375	18.8648	23.9309	19.9939	12.447	17.6838	27.7844	44.3396
662	PANI	Training	Aniline	[Ani]	0.1	Ammonium persulfate	[APS]	0.1	/	[/]	0	Hydrochloric acid	[HCl]	100	1	Water	[H2O]	11.11	Acetone	[C3H6O]	2.6997	Dimethylformamide	[C3H7NO]	2.5831		0	0	0	0	0	0	0	0	0	0	0	0	1.29987	6.71044	21.5534	34.7076	27.375	18.8648	23.9309	19.9939	12.447	17.6838	27.7844	44.3396
663	PANI	Training	Aniline	[Ani]	0.1	Ammonium persulfate	[APS]	0.1	/	[/]	0	Hydrochloric acid	[HCl]	100	1	Water	[H2O]	11.11	Acetone	[C3H6O]	2.6997	Dimethylformamide	[C3H7NO]	2.5831		0	0	0	0	0	0	0	0	0	0	0	0	1.29987	6.71044	21.5534	34.7076	27.375	18.8648	23.9309	19.9939	12.447	17.6838	27.7844	44.3396
664	PANI	Test	Aniline	[Ani]	0.1	Ammonium persulfate	[APS]	0.1	/	[/]	0	Hydrochloric acid	[HCl]	100	1	Water	[H2O]	11.11	Acetone	[C3H6O]	2.6997	Dimethylformamide	[C3H7NO]	2.5831		0	0	0	0	0	0	0	0	0	0	0	0	1.29987	6.71044	21.5534	34.7076	27.375	18.8648	23.9309	19.9939	12.447	17.6838	27.7844	44.3396
665	PANI	Training	Aniline	[Ani]	0.1	Ammonium persulfate	[APS]	0.1	/	[/]	0	Hydrochloric acid	[HCl]	100	1	Water	[H2O]	11.11	Acetone	[C3H6O]	2.6997	Dimethylformamide	[C3H7NO]	2.5831		0	0	0	0	0	0	0	0	0	0	0	0	1.29987	6.71044	21.5534	34.7076	27.375	18.8648	23.9309	19.9939	12.447	17.6838	27.7844	44.3396
668	PANI	Training	Aniline	[Ani]	0.1	Ammonium persulfate	[APS]	0.1	/	[/]	0	Hydrochloric acid	[HCl]	100	1	Water	[H2O]	11.11	Acetone	[C3H6O]	2.6997	Dimethylformamide	[C3H7NO]	2.5831		0	0	0	0	0	0	0	0	0	0	0	0	1.29987	6.71044	21.5534	34.7076	27.375	18.8648	23.9309	19.9939	12.447	17.6838	27.7844	44.3396
514	PANI	Test	Aniline	[Ani]	0.5	Ammonium persulfate	[APS]	0.5	/	[/]	0	Hydrochloric acid	[HCl]	40	1	/	[/]	0	/	[/]	0	/	[/]	0		0	0	0	0	0	0	0	0	0	0	0	0	0	0	0	0	0	0	0	0	0	0	0	0
515	PANI	Test	Aniline	[Ani]	0.5	Ammonium persulfate	[APS]	0.5	/	[/]	0	Hydrochloric acid	[HCl]	40	1	/	[/]	0	/	[/]	0	/	[/]	0		0	0	0	0	0	0	0	0	0	0	0	0	0	0	0	0	0	0	0	0	0	0	0	0
516	PANI	Training	Aniline	[Ani]	0.5	Ammonium persulfate	[APS]	0.5	/	[/]	0	Hydrochloric acid	[HCl]	40	1	/	[/]	0	/	[/]	0	/	[/]	0		0	0	0	0	0	0	0	0	0	0	0	0	0	0	0	0	0	0	0	0	0	0	0	0
517	PANI	Training	Aniline	[Ani]	0.5	Ammonium persulfate	[APS]	0.5	/	[/]	0	Hydrochloric acid	[HCl]	40	1	/	[/]	0	/	[/]	0	/	[/]	0		0	0	0	0	0	0	0	0	0	0	0	0	0	0	0	0	0	0	0	0	0	0	0	0
518	PANI	Training	Aniline	[Ani]	0.5	Ammonium persulfate	[APS]	0.5	/	[/]	0	Hydrochloric acid	[HCl]	40	1	/	[/]	0	/	[/]	0	/	[/]	0		0	0	0	0	0	0	0	0	0	0	0	0	0	0	0	0	0	0	0	0	0	0	0	0
519	PANI	Training	Aniline	[Ani]	0.5	Ammonium persulfate	[APS]	0.5	/	[/]	0	Hydrochloric acid	[HCl]	40	1	/	[/]	0	/	[/]	0	/	[/]	0		0	0	0	0	0	0	0	0	0	0	0	0	0	0	0	0	0	0	0	0	0	0	0	0
520	PANI	Training	Aniline	[Ani]	0.5	Ammonium persulfate	[APS]	0.5	/	[/]	0	Hydrochloric acid	[HCl]	40	1	/	[/]	0	/	[/]	0	/	[/]	0		0	0	0	0	0	0	0	0	0	0	0	0	0	0	0	0	0	0	0	0	0	0	0	0
521	PANI	Training	Aniline	[Ani]	0.5	Ammonium persulfate	[APS]	0.5	/	[/]	0	Hydrochloric acid	[HCl]	40	1	/	[/]	0	/	[/]	0	/	[/]	0		0	0	0	0	0	0	0	0	0	0	0	0	0	0	0	0	0	0	0	0	0	0	0	0
522	PANI	Test	Aniline	[Ani]	0.5	Ammonium persulfate	[APS]	0.5	/	[/]	0	Hydrochloric acid	[HCl]	40	1	/	[/]	0	/	[/]	0	/	[/]	0		0	0	0	0	0	0	0	0	0	0	0	0	0	0	0	0	0	0	0	0	0	0	0	0
523	PANI	Training	Aniline	[Ani]	0.5	Ammonium persulfate	[APS]	0.5	/	[/]	0	Hydrochloric acid	[HCl]	40	1	/	[/]	0	/	[/]	0	/	[/]	0		0	0	0	0	0	0	0	0	0	0	0	0	0	0	0	0	0	0	0	0	0	0	0	0
524	PANI	Training	Aniline	[Ani]	0.5	Ammonium persulfate	[APS]	0.5	/	[/]	0	Hydrochloric acid	[HCl]	40	1	/	[/]	0	/	[/]	0	/	[/]	0		0	0	0	0	0	0	0	0	0	0	0	0	0	0	0	0	0	0	0	0	0	0	0	0
525	PANI	Training	Aniline	[Ani]	0.5	Ammonium persulfate	[APS]	0.5	/	[/]	0	Hydrochloric acid	[HCl]	40	1	/	[/]	0	/	[/]	0	/	[/]	0		0	0	0	0	0	0	0	0	0	0	0	0	0	0	0	0	0	0	0	0	0	0	0	0
526	PANI	Training	Aniline	[Ani]	0.5	Ammonium persulfate	[APS]	0.5	/	[/]	0	Hydrochloric acid	[HCl]	40	1	/	[/]	0	/	[/]	0	/	[/]	0		0	0	0	0	0	0	0	0	0	0	0	0	0	0	0	0	0	0	0	0	0	0	0	0
527	PANI	Test	Aniline	[Ani]	0.5	Ammonium persulfate	[APS]	0.5	/	[/]	0	Hydrochloric acid	[HCl]	40	1	/	[/]	0	/	[/]	0	/	[/]	0		0	0	0	0	0	0	0	0	0	0	0	0	0	0	0	0	0	0	0	0	0	0	0	0
528	PANI	Training	Aniline	[Ani]	0.5	Ammonium persulfate	[APS]	0.5	/	[/]	0	Hydrochloric acid	[HCl]	40	1	/	[/]	0	/	[/]	0	/	[/]	0		0	0	0	0	0	0	0	0	0	0	0	0	0	0	0	0	0	0	0	0	0	0	0	0
529	PANI	Training	Aniline	[Ani]	0.5	Ammonium persulfate	[APS]	0.5	/	[/]	0	Hydrochloric acid	[HCl]	40	1	/	[/]	0	/	[/]	0	/	[/]	0		0	0	0	0	0	0	0	0	0	0	0	0	0	0	0	0	0	0	0	0	0	0	0	0
530	PANI	Training	Aniline	[Ani]	0.5	Ammonium persulfate	[APS]	0.5	/	[/]	0	Hydrochloric acid	[HCl]	40	1	/	[/]	0	/	[/]	0	/	[/]	0		0	0	0	0	0	0	0	0	0	0	0	0	0	0	0	0	0	0	0	0	0	0	0	0
531	PANI	Training	Aniline	[Ani]	0.5	Ammonium persulfate	[APS]	0.5	/	[/]	0	Hydrochloric acid	[HCl]	40	1	/	[/]	0	/	[/]	0	/	[/]	0		0	0	0	0	0	0	0	0	0	0	0	0	0	0	0	0	0	0	0	0	0	0	0	0
532	PANI	Training	Aniline	[Ani]	0.5	Ammonium persulfate	[APS]	0.5	/	[/]	0	Hydrochloric acid	[HCl]	40	1	/	[/]	0	/	[/]	0	/	[/]	0		0	0	0	0	0	0	0	0	0	0	0	0	0	0	0	0	0	0	0	0	0	0	0	0
533	PANI	Training	Aniline	[Ani]	0.5	Ammonium persulfate	[APS]	0.5	/	[/]	0	Hydrochloric acid	[HCl]	40	1	/	[/]	0	/	[/]	0	/	[/]	0		0	0	0	0	0	0	0	0	0	0	0	0	0	0	0	0	0	0	0	0	0	0	0	0
534	PANI	Test	Aniline	[Ani]	0.5	Ammonium persulfate	[APS]	0.5	/	[/]	0	Hydrochloric acid	[HCl]	40	1	/	[/]	0	/	[/]	0	/	[/]	0		0	0	0	0	0	0	0	0	0	0	0	0	0	0	0	0	0	0	0	0	0	0	0	0
535	PANI	Training	Aniline	[Ani]	0.5	Ammonium persulfate	[APS]	0.5	/	[/]	0	Hydrochloric acid	[HCl]	40	1	/	[/]	0	/	[/]	0	/	[/]	0		0	0	0	0	0	0	0	0	0	0	0	0	0	0	0	0	0	0	0	0	0	0	0	0
536	PANI	Training	Aniline	[Ani]	0.5	Ammonium persulfate	[APS]	0.5	/	[/]	0	Hydrochloric acid	[HCl]	40	1	/	[/]	0	/	[/]	0	/	[/]	0		0	0	0	0	0	0	0	0	0	0	0	0	0	0	0	0	0	0	0	0	0	0	0	0
537	PANI	Test	Aniline	[Ani]	0.5	Ammonium persulfate	[APS]	0.5	/	[/]	0	Hydrochloric acid	[HCl]	40	1	/	[/]	0	/	[/]	0	/	[/]	0		0	0	0	0	0	0	0	0	0	0	0	0	0	0	0	0	0	0	0	0	0	0	0	0
538	PANI	Training	Aniline	[Ani]	0.5	Ammonium persulfate	[APS]	0.5	/	[/]	0	Hydrochloric acid	[HCl]	40	1	/	[/]	0	/	[/]	0	/	[/]	0		0	0	0	0	0	0	0	0	0	0	0	0	0	0	0	0	0	0	0	0	0	0	0	0
539	PANI	Training	Aniline	[Ani]	0.5	Ammonium persulfate	[APS]	0.5	/	[/]	0	Hydrochloric acid	[HCl]	40	1	/	[/]	0	/	[/]	0	/	[/]	0		0	0	0	0	0	0	0	0	0	0	0	0	0	0	0	0	0	0	0	0	0	0	0	0
540	PANI	Training	Aniline	[Ani]	0.5	Ammonium persulfate	[APS]	0.5	/	[/]	0	Hydrochloric acid	[HCl]	40	1	/	[/]	0	/	[/]	0	/	[/]	0		0	0	0	0	0	0	0	0	0	0	0	0	0	0	0	0	0	0	0	0	0	0	0	0
541	PANI/Gr	Training	Aniline	[Ani]	0.5	Ammonium persulfate	[APS]	0.5	Graphene	[Gr]	2	Hydrochloric acid	[HCl]	40	1	Dimethyl propylene urea	[C6H12N2O]	0.332	/	[/]	0	/	[/]	0		0	0	0	0	0	0	0	0	0	0	0	0	0	0	0	0	0	0	0	0	0	0	0.137116	1.25396
542	PANI/Gr	Test	Aniline	[Ani]	0.5	Ammonium persulfate	[APS]	0.5	Graphene	[Gr]	2	Hydrochloric acid	[HCl]	40	1	Dimethyl propylene urea	[C6H12N2O]	0.332	/	[/]	0	/	[/]	0		0	0	0	0	0	0	0	0	0	0	0	0	0	0	0	0	0	0	0	0	0	0	0.137116	1.25396
543	PANI/Gr	Training	Aniline	[Ani]	0.5	Ammonium persulfate	[APS]	0.5	Graphene	[Gr]	2	Hydrochloric acid	[HCl]	40	1	Dimethyl propylene urea	[C6H12N2O]	0.332	/	[/]	0	/	[/]	0		0	0	0	0	0	0	0	0	0	0	0	0	0	0	0	0	0	0	0	0	0	0	0.137116	1.25396
544	PANI/Gr	Training	Aniline	[Ani]	0.5	Ammonium persulfate	[APS]	0.5	Graphene	[Gr]	2	Hydrochloric acid	[HCl]	40	1	Dimethyl propylene urea	[C6H12N2O]	0.332	/	[/]	0	/	[/]	0		0	0	0	0	0	0	0	0	0	0	0	0	0	0	0	0	0	0	0	0	0	0	0.137116	1.25396
545	PANI/Gr	Training	Aniline	[Ani]	0.5	Ammonium persulfate	[APS]	0.5	Graphene	[Gr]	2	Hydrochloric acid	[HCl]	40	1	Dimethyl propylene urea	[C6H12N2O]	0.332	/	[/]	0	/	[/]	0		0	0	0	0	0	0	0	0	0	0	0	0	0	0	0	0	0	0	0	0	0	0	0.137116	1.25396
546	PANI/Gr	Training	Aniline	[Ani]	0.5	Ammonium persulfate	[APS]	0.5	Graphene	[Gr]	2	Hydrochloric acid	[HCl]	40	1	Dimethyl propylene urea	[C6H12N2O]	0.332	/	[/]	0	/	[/]	0		0	0	0	0	0	0	0	0	0	0	0	0	0	0	0	0	0	0	0	0	0	0	0.137116	1.25396
547	PANI/Gr	Training	Aniline	[Ani]	0.5	Ammonium persulfate	[APS]	0.5	Graphene	[Gr]	2	Hydrochloric acid	[HCl]	40	1	Dimethyl propylene urea	[C6H12N2O]	0.332	/	[/]	0	/	[/]	0		0	0	0	0	0	0	0	0	0	0	0	0	0	0	0	0	0	0	0	0	0	0	0.137116	1.25396
548	PANI/Gr	Test	Aniline	[Ani]	0.5	Ammonium persulfate	[APS]	0.5	Graphene	[Gr]	2	Hydrochloric acid	[HCl]	40	1	Dimethyl propylene urea	[C6H12N2O]	0.332	/	[/]	0	/	[/]	0		0	0	0	0	0	0	0	0	0	0	0	0	0	0	0	0	0	0	0	0	0	0	0.137116	1.25396
549	PANI/Gr	Training	Aniline	[Ani]	0.5	Ammonium persulfate	[APS]	0.5	Graphene	[Gr]	2	Hydrochloric acid	[HCl]	40	1	Dimethyl propylene urea	[C6H12N2O]	0.332	/	[/]	0	/	[/]	0		0	0	0	0	0	0	0	0	0	0	0	0	0	0	0	0	0	0	0	0	0	0	0.137116	1.25396
550	PANI/Gr	Test	Aniline	[Ani]	0.5	Ammonium persulfate	[APS]	0.5	Graphene	[Gr]	2	Hydrochloric acid	[HCl]	40	1	Dimethyl propylene urea	[C6H12N2O]	0.332	/	[/]	0	/	[/]	0		0	0	0	0	0	0	0	0	0	0	0	0	0	0	0	0	0	0	0	0	0	0	0.137116	1.25396
551	PANI/Gr	Training	Aniline	[Ani]	0.5	Ammonium persulfate	[APS]	0.5	Graphene	[Gr]	2	Hydrochloric acid	[HCl]	40	1	Dimethyl propylene urea	[C6H12N2O]	0.332	/	[/]	0	/	[/]	0		0	0	0	0	0	0	0	0	0	0	0	0	0	0	0	0	0	0	0	0	0	0	0.137116	1.25396
552	PANI/Gr	Training	Aniline	[Ani]	0.5	Ammonium persulfate	[APS]	0.5	Graphene	[Gr]	2	Hydrochloric acid	[HCl]	40	1	Dimethyl propylene urea	[C6H12N2O]	0.332	/	[/]	0	/	[/]	0		0	0	0	0	0	0	0	0	0	0	0	0	0	0	0	0	0	0	0	0	0	0	0.137116	1.25396
553	PANI/Gr	Training	Aniline	[Ani]	0.5	Ammonium persulfate	[APS]	0.5	Graphene	[Gr]	2	Hydrochloric acid	[HCl]	40	1	Dimethyl propylene urea	[C6H12N2O]	0.332	/	[/]	0	/	[/]	0		0	0	0	0	0	0	0	0	0	0	0	0	0	0	0	0	0	0	0	0	0	0	0.137116	1.25396
554	PANI/Gr	Training	Aniline	[Ani]	0.5	Ammonium persulfate	[APS]	0.5	Graphene	[Gr]	2	Hydrochloric acid	[HCl]	40	1	Dimethyl propylene urea	[C6H12N2O]	0.332	/	[/]	0	/	[/]	0		0	0	0	0	0	0	0	0	0	0	0	0	0	0	0	0	0	0	0	0	0	0	0.137116	1.25396
555	PANI/Gr	Training	Aniline	[Ani]	0.5	Ammonium persulfate	[APS]	0.5	Graphene	[Gr]	2	Hydrochloric acid	[HCl]	40	1	Dimethyl propylene urea	[C6H12N2O]	0.332	/	[/]	0	/	[/]	0		0	0	0	0	0	0	0	0	0	0	0	0	0	0	0	0	0	0	0	0	0	0	0.137116	1.25396
556	PANI/Gr	Training	Aniline	[Ani]	0.5	Ammonium persulfate	[APS]	0.5	Graphene	[Gr]	2	Hydrochloric acid	[HCl]	40	1	Dimethyl propylene urea	[C6H12N2O]	0.332	/	[/]	0	/	[/]	0		0	0	0	0	0	0	0	0	0	0	0	0	0	0	0	0	0	0	0	0	0	0	0.137116	1.25396
557	PANI/Gr	Test	Aniline	[Ani]	0.5	Ammonium persulfate	[APS]	0.5	Graphene	[Gr]	2	Hydrochloric acid	[HCl]	40	1	Dimethyl propylene urea	[C6H12N2O]	0.332	/	[/]	0	/	[/]	0		0	0	0	0	0	0	0	0	0	0	0	0	0	0	0	0	0	0	0	0	0	0	0.137116	1.25396
558	PANI/Gr	Training	Aniline	[Ani]	0.5	Ammonium persulfate	[APS]	0.5	Graphene	[Gr]	2	Hydrochloric acid	[HCl]	40	1	Dimethyl propylene urea	[C6H12N2O]	0.332	/	[/]	0	/	[/]	0		0	0	0	0	0	0	0	0	0	0	0	0	0	0	0	0	0	0	0	0	0	0	0.137116	1.25396
559	PANI/Gr	Test	Aniline	[Ani]	0.5	Ammonium persulfate	[APS]	0.5	Graphene	[Gr]	2	Hydrochloric acid	[HCl]	40	1	Dimethyl propylene urea	[C6H12N2O]	0.332	/	[/]	0	/	[/]	0		0	0	0	0	0	0	0	0	0	0	0	0	0	0	0	0	0	0	0	0	0	0	0.137116	1.25396
560	PANI/Gr	Training	Aniline	[Ani]	0.5	Ammonium persulfate	[APS]	0.5	Graphene	[Gr]	2	Hydrochloric acid	[HCl]	40	1	Dimethyl propylene urea	[C6H12N2O]	0.332	/	[/]	0	/	[/]	0		0	0	0	0	0	0	0	0	0	0	0	0	0	0	0	0	0	0	0	0	0	0	0.137116	1.25396
561	PANI/Gr	Test	Aniline	[Ani]	0.5	Ammonium persulfate	[APS]	0.5	Graphene	[Gr]	2	Hydrochloric acid	[HCl]	40	1	Dimethyl propylene urea	[C6H12N2O]	0.332	/	[/]	0	/	[/]	0		0	0	0	0	0	0	0	0	0	0	0	0	0	0	0	0	0	0	0	0	0	0	0.137116	1.25396
562	PANI/Gr	Training	Aniline	[Ani]	0.5	Ammonium persulfate	[APS]	0.5	Graphene	[Gr]	2	Hydrochloric acid	[HCl]	40	1	Dimethyl propylene urea	[C6H12N2O]	0.332	/	[/]	0	/	[/]	0		0	0	0	0	0	0	0	0	0	0	0	0	0	0	0	0	0	0	0	0	0	0	0.137116	1.25396
563	PANI/Gr	Training	Aniline	[Ani]	0.5	Ammonium persulfate	[APS]	0.5	Graphene	[Gr]	2	Hydrochloric acid	[HCl]	40	1	Dimethyl propylene urea	[C6H12N2O]	0.332	/	[/]	0	/	[/]	0		0	0	0	0	0	0	0	0	0	0	0	0	0	0	0	0	0	0	0	0	0	0	0.137116	1.25396
564	PANI/Gr	Training	Aniline	[Ani]	0.5	Ammonium persulfate	[APS]	0.5	Graphene	[Gr]	2	Hydrochloric acid	[HCl]	40	1	Dimethyl propylene urea	[C6H12N2O]	0.332	/	[/]	0	/	[/]	0		0	0	0	0	0	0	0	0	0	0	0	0	0	0	0	0	0	0	0	0	0	0	0.137116	1.25396
565	PANI/Gr	Training	Aniline	[Ani]	0.5	Ammonium persulfate	[APS]	0.5	Graphene	[Gr]	2	Hydrochloric acid	[HCl]	40	1	Dimethyl propylene urea	[C6H12N2O]	0.332	/	[/]	0	/	[/]	0		0	0	0	0	0	0	0	0	0	0	0	0	0	0	0	0	0	0	0	0	0	0	0.137116	1.25396
566	PANI/Gr	Training	Aniline	[Ani]	0.5	Ammonium persulfate	[APS]	0.5	Graphene	[Gr]	2	Hydrochloric acid	[HCl]	40	1	Dimethyl propylene urea	[C6H12N2O]	0.332	/	[/]	0	/	[/]	0		0	0	0	0	0	0	0	0	0	0	0	0	0	0	0	0	0	0	0	0	0	0	0.137116	1.25396
567	PANI/Gr	Training	Aniline	[Ani]	0.5	Ammonium persulfate	[APS]	0.5	Graphene	[Gr]	2	Hydrochloric acid	[HCl]	40	1	Dimethyl propylene urea	[C6H12N2O]	0.332	/	[/]	0	/	[/]	0		0	0	0	0	0	0	0	0	0	0	0	0	0	0	0	0	0	0	0	0	0	0	0.137116	1.25396
568	PANI/Gr	Training	Aniline	[Ani]	0.5	Ammonium persulfate	[APS]	0.5	Graphene	[Gr]	2	Hydrochloric acid	[HCl]	40	1	Dimethyl propylene urea	[C6H12N2O]	0.332	/	[/]	0	/	[/]	0		0	0	0	0	0	0	0	0	0	0	0	0	0	0	0	0	0	0	0	0	0	0	0.137116	1.25396
569	PANI/Gr	Training	Aniline	[Ani]	0.5	Ammonium persulfate	[APS]	0.5	Graphene	[Gr]	4	Hydrochloric acid	[HCl]	40	1	Dimethyl propylene urea	[C6H12N2O]	0.332	/	[/]	0	/	[/]	0		0	0	0	0	0	0	0	0	0	0	0	0	0	0	0	0	0	0	0	0	0	0	0.137116	1.25396
570	PANI/Gr	Training	Aniline	[Ani]	0.5	Ammonium persulfate	[APS]	0.5	Graphene	[Gr]	4	Hydrochloric acid	[HCl]	40	1	Dimethyl propylene urea	[C6H12N2O]	0.332	/	[/]	0	/	[/]	0		0	0	0	0	0	0	0	0	0	0	0	0	0	0	0	0	0	0	0	0	0	0	0.137116	1.25396
571	PANI/Gr	Training	Aniline	[Ani]	0.5	Ammonium persulfate	[APS]	0.5	Graphene	[Gr]	4	Hydrochloric acid	[HCl]	40	1	Dimethyl propylene urea	[C6H12N2O]	0.332	/	[/]	0	/	[/]	0		0	0	0	0	0	0	0	0	0	0	0	0	0	0	0	0	0	0	0	0	0	0	0.137116	1.25396
572	PANI/Gr	Training	Aniline	[Ani]	0.5	Ammonium persulfate	[APS]	0.5	Graphene	[Gr]	4	Hydrochloric acid	[HCl]	40	1	Dimethyl propylene urea	[C6H12N2O]	0.332	/	[/]	0	/	[/]	0		0	0	0	0	0	0	0	0	0	0	0	0	0	0	0	0	0	0	0	0	0	0	0.137116	1.25396
573	PANI/Gr	Training	Aniline	[Ani]	0.5	Ammonium persulfate	[APS]	0.5	Graphene	[Gr]	4	Hydrochloric acid	[HCl]	40	1	Dimethyl propylene urea	[C6H12N2O]	0.332	/	[/]	0	/	[/]	0		0	0	0	0	0	0	0	0	0	0	0	0	0	0	0	0	0	0	0	0	0	0	0.137116	1.25396
574	PANI/Gr	Training	Aniline	[Ani]	0.5	Ammonium persulfate	[APS]	0.5	Graphene	[Gr]	4	Hydrochloric acid	[HCl]	40	1	Dimethyl propylene urea	[C6H12N2O]	0.332	/	[/]	0	/	[/]	0		0	0	0	0	0	0	0	0	0	0	0	0	0	0	0	0	0	0	0	0	0	0	0.137116	1.25396
575	PANI/Gr	Training	Aniline	[Ani]	0.5	Ammonium persulfate	[APS]	0.5	Graphene	[Gr]	4	Hydrochloric acid	[HCl]	40	1	Dimethyl propylene urea	[C6H12N2O]	0.332	/	[/]	0	/	[/]	0		0	0	0	0	0	0	0	0	0	0	0	0	0	0	0	0	0	0	0	0	0	0	0.137116	1.25396
576	PANI/Gr	Training	Aniline	[Ani]	0.5	Ammonium persulfate	[APS]	0.5	Graphene	[Gr]	4	Hydrochloric acid	[HCl]	40	1	Dimethyl propylene urea	[C6H12N2O]	0.332	/	[/]	0	/	[/]	0		0	0	0	0	0	0	0	0	0	0	0	0	0	0	0	0	0	0	0	0	0	0	0.137116	1.25396
577	PANI/Gr	Training	Aniline	[Ani]	0.5	Ammonium persulfate	[APS]	0.5	Graphene	[Gr]	4	Hydrochloric acid	[HCl]	40	1	Dimethyl propylene urea	[C6H12N2O]	0.332	/	[/]	0	/	[/]	0		0	0	0	0	0	0	0	0	0	0	0	0	0	0	0	0	0	0	0	0	0	0	0.137116	1.25396
578	PANI/Gr	Training	Aniline	[Ani]	0.5	Ammonium persulfate	[APS]	0.5	Graphene	[Gr]	4	Hydrochloric acid	[HCl]	40	1	Dimethyl propylene urea	[C6H12N2O]	0.332	/	[/]	0	/	[/]	0		0	0	0	0	0	0	0	0	0	0	0	0	0	0	0	0	0	0	0	0	0	0	0.137116	1.25396
579	PANI/Gr	Test	Aniline	[Ani]	0.5	Ammonium persulfate	[APS]	0.5	Graphene	[Gr]	4	Hydrochloric acid	[HCl]	40	1	Dimethyl propylene urea	[C6H12N2O]	0.332	/	[/]	0	/	[/]	0		0	0	0	0	0	0	0	0	0	0	0	0	0	0	0	0	0	0	0	0	0	0	0.137116	1.25396
580	PANI/Gr	Training	Aniline	[Ani]	0.5	Ammonium persulfate	[APS]	0.5	Graphene	[Gr]	4	Hydrochloric acid	[HCl]	40	1	Dimethyl propylene urea	[C6H12N2O]	0.332	/	[/]	0	/	[/]	0		0	0	0	0	0	0	0	0	0	0	0	0	0	0	0	0	0	0	0	0	0	0	0.137116	1.25396
581	PANI/Gr	Training	Aniline	[Ani]	0.5	Ammonium persulfate	[APS]	0.5	Graphene	[Gr]	4	Hydrochloric acid	[HCl]	40	1	Dimethyl propylene urea	[C6H12N2O]	0.332	/	[/]	0	/	[/]	0		0	0	0	0	0	0	0	0	0	0	0	0	0	0	0	0	0	0	0	0	0	0	0.137116	1.25396
582	PANI/Gr	Training	Aniline	[Ani]	0.5	Ammonium persulfate	[APS]	0.5	Graphene	[Gr]	4	Hydrochloric acid	[HCl]	40	1	Dimethyl propylene urea	[C6H12N2O]	0.332	/	[/]	0	/	[/]	0		0	0	0	0	0	0	0	0	0	0	0	0	0	0	0	0	0	0	0	0	0	0	0.137116	1.25396
583	PANI/Gr	Training	Aniline	[Ani]	0.5	Ammonium persulfate	[APS]	0.5	Graphene	[Gr]	4	Hydrochloric acid	[HCl]	40	1	Dimethyl propylene urea	[C6H12N2O]	0.332	/	[/]	0	/	[/]	0		0	0	0	0	0	0	0	0	0	0	0	0	0	0	0	0	0	0	0	0	0	0	0.137116	1.25396
584	PANI/Gr	Training	Aniline	[Ani]	0.5	Ammonium persulfate	[APS]	0.5	Graphene	[Gr]	4	Hydrochloric acid	[HCl]	40	1	Dimethyl propylene urea	[C6H12N2O]	0.332	/	[/]	0	/	[/]	0		0	0	0	0	0	0	0	0	0	0	0	0	0	0	0	0	0	0	0	0	0	0	0.137116	1.25396
585	PANI/Gr	Training	Aniline	[Ani]	0.5	Ammonium persulfate	[APS]	0.5	Graphene	[Gr]	4	Hydrochloric acid	[HCl]	40	1	Dimethyl propylene urea	[C6H12N2O]	0.332	/	[/]	0	/	[/]	0		0	0	0	0	0	0	0	0	0	0	0	0	0	0	0	0	0	0	0	0	0	0	0.137116	1.25396
586	PANI/Gr	Training	Aniline	[Ani]	0.5	Ammonium persulfate	[APS]	0.5	Graphene	[Gr]	4	Hydrochloric acid	[HCl]	40	1	Dimethyl propylene urea	[C6H12N2O]	0.332	/	[/]	0	/	[/]	0		0	0	0	0	0	0	0	0	0	0	0	0	0	0	0	0	0	0	0	0	0	0	0.137116	1.25396
587	PANI/Gr	Training	Aniline	[Ani]	0.5	Ammonium persulfate	[APS]	0.5	Graphene	[Gr]	4	Hydrochloric acid	[HCl]	40	1	Dimethyl propylene urea	[C6H12N2O]	0.332	/	[/]	0	/	[/]	0		0	0	0	0	0	0	0	0	0	0	0	0	0	0	0	0	0	0	0	0	0	0	0.137116	1.25396
588	PANI/Gr	Training	Aniline	[Ani]	0.5	Ammonium persulfate	[APS]	0.5	Graphene	[Gr]	4	Hydrochloric acid	[HCl]	40	1	Dimethyl propylene urea	[C6H12N2O]	0.332	/	[/]	0	/	[/]	0		0	0	0	0	0	0	0	0	0	0	0	0	0	0	0	0	0	0	0	0	0	0	0.137116	1.25396
589	PANI/Gr	Training	Aniline	[Ani]	0.5	Ammonium persulfate	[APS]	0.5	Graphene	[Gr]	4	Hydrochloric acid	[HCl]	40	1	Dimethyl propylene urea	[C6H12N2O]	0.332	/	[/]	0	/	[/]	0		0	0	0	0	0	0	0	0	0	0	0	0	0	0	0	0	0	0	0	0	0	0	0.137116	1.25396
590	PANI/Gr	Training	Aniline	[Ani]	0.5	Ammonium persulfate	[APS]	0.5	Graphene	[Gr]	4	Hydrochloric acid	[HCl]	40	1	Dimethyl propylene urea	[C6H12N2O]	0.332	/	[/]	0	/	[/]	0		0	0	0	0	0	0	0	0	0	0	0	0	0	0	0	0	0	0	0	0	0	0	0.137116	1.25396
591	PANI/Gr	Test	Aniline	[Ani]	0.5	Ammonium persulfate	[APS]	0.5	Graphene	[Gr]	4	Hydrochloric acid	[HCl]	40	1	Dimethyl propylene urea	[C6H12N2O]	0.332	/	[/]	0	/	[/]	0		0	0	0	0	0	0	0	0	0	0	0	0	0	0	0	0	0	0	0	0	0	0	0.137116	1.25396
592	PANI/Gr	Training	Aniline	[Ani]	0.5	Ammonium persulfate	[APS]	0.5	Graphene	[Gr]	4	Hydrochloric acid	[HCl]	40	1	Dimethyl propylene urea	[C6H12N2O]	0.332	/	[/]	0	/	[/]	0		0	0	0	0	0	0	0	0	0	0	0	0	0	0	0	0	0	0	0	0	0	0	0.137116	1.25396
593	PANI/Gr	Test	Aniline	[Ani]	0.5	Ammonium persulfate	[APS]	0.5	Graphene	[Gr]	4	Hydrochloric acid	[HCl]	40	1	Dimethyl propylene urea	[C6H12N2O]	0.332	/	[/]	0	/	[/]	0		0	0	0	0	0	0	0	0	0	0	0	0	0	0	0	0	0	0	0	0	0	0	0.137116	1.25396
594	PANI/Gr	Training	Aniline	[Ani]	0.5	Ammonium persulfate	[APS]	0.5	Graphene	[Gr]	4	Hydrochloric acid	[HCl]	40	1	Dimethyl propylene urea	[C6H12N2O]	0.332	/	[/]	0	/	[/]	0		0	0	0	0	0	0	0	0	0	0	0	0	0	0	0	0	0	0	0	0	0	0	0.137116	1.25396
595	PANI/Gr	Training	Aniline	[Ani]	0.5	Ammonium persulfate	[APS]	0.5	Graphene	[Gr]	4	Hydrochloric acid	[HCl]	40	1	Dimethyl propylene urea	[C6H12N2O]	0.332	/	[/]	0	/	[/]	0		0	0	0	0	0	0	0	0	0	0	0	0	0	0	0	0	0	0	0	0	0	0	0.137116	1.25396
596	PANI/Gr	Test	Aniline	[Ani]	0.5	Ammonium persulfate	[APS]	0.5	Graphene	[Gr]	4	Hydrochloric acid	[HCl]	40	1	Dimethyl propylene urea	[C6H12N2O]	0.332	/	[/]	0	/	[/]	0		0	0	0	0	0	0	0	0	0	0	0	0	0	0	0	0	0	0	0	0	0	0	0.137116	1.25396
597	PANI/Gr	Training	Aniline	[Ani]	0.5	Ammonium persulfate	[APS]	0.5	Graphene	[Gr]	4	Hydrochloric acid	[HCl]	40	1	Dimethyl propylene urea	[C6H12N2O]	0.332	/	[/]	0	/	[/]	0		0	0	0	0	0	0	0	0	0	0	0	0	0	0	0	0	0	0	0	0	0	0	0.137116	1.25396
598	PANI/Gr	Training	Aniline	[Ani]	0.5	Ammonium persulfate	[APS]	0.5	Graphene	[Gr]	6	Hydrochloric acid	[HCl]	40	1	Dimethyl propylene urea	[C6H12N2O]	0.332	/	[/]	0	/	[/]	0		0	0	0	0	0	0	0	0	0	0	0	0	0	0	0	0	0	0	0	0	0	0	0.137116	1.25396
599	PANI/Gr	Test	Aniline	[Ani]	0.5	Ammonium persulfate	[APS]	0.5	Graphene	[Gr]	6	Hydrochloric acid	[HCl]	40	1	Dimethyl propylene urea	[C6H12N2O]	0.332	/	[/]	0	/	[/]	0		0	0	0	0	0	0	0	0	0	0	0	0	0	0	0	0	0	0	0	0	0	0	0.137116	1.25396
600	PANI/Gr	Training	Aniline	[Ani]	0.5	Ammonium persulfate	[APS]	0.5	Graphene	[Gr]	6	Hydrochloric acid	[HCl]	40	1	Dimethyl propylene urea	[C6H12N2O]	0.332	/	[/]	0	/	[/]	0		0	0	0	0	0	0	0	0	0	0	0	0	0	0	0	0	0	0	0	0	0	0	0.137116	1.25396
601	PANI/Gr	Training	Aniline	[Ani]	0.5	Ammonium persulfate	[APS]	0.5	Graphene	[Gr]	6	Hydrochloric acid	[HCl]	40	1	Dimethyl propylene urea	[C6H12N2O]	0.332	/	[/]	0	/	[/]	0		0	0	0	0	0	0	0	0	0	0	0	0	0	0	0	0	0	0	0	0	0	0	0.137116	1.25396
602	PANI/Gr	Training	Aniline	[Ani]	0.5	Ammonium persulfate	[APS]	0.5	Graphene	[Gr]	6	Hydrochloric acid	[HCl]	40	1	Dimethyl propylene urea	[C6H12N2O]	0.332	/	[/]	0	/	[/]	0		0	0	0	0	0	0	0	0	0	0	0	0	0	0	0	0	0	0	0	0	0	0	0.137116	1.25396
603	PANI/Gr	Test	Aniline	[Ani]	0.5	Ammonium persulfate	[APS]	0.5	Graphene	[Gr]	6	Hydrochloric acid	[HCl]	40	1	Dimethyl propylene urea	[C6H12N2O]	0.332	/	[/]	0	/	[/]	0		0	0	0	0	0	0	0	0	0	0	0	0	0	0	0	0	0	0	0	0	0	0	0.137116	1.25396
604	PANI/Gr	Training	Aniline	[Ani]	0.5	Ammonium persulfate	[APS]	0.5	Graphene	[Gr]	6	Hydrochloric acid	[HCl]	40	1	Dimethyl propylene urea	[C6H12N2O]	0.332	/	[/]	0	/	[/]	0		0	0	0	0	0	0	0	0	0	0	0	0	0	0	0	0	0	0	0	0	0	0	0.137116	1.25396
605	PANI/Gr	Training	Aniline	[Ani]	0.5	Ammonium persulfate	[APS]	0.5	Graphene	[Gr]	6	Hydrochloric acid	[HCl]	40	1	Dimethyl propylene urea	[C6H12N2O]	0.332	/	[/]	0	/	[/]	0		0	0	0	0	0	0	0	0	0	0	0	0	0	0	0	0	0	0	0	0	0	0	0.137116	1.25396
606	PANI/Gr	Test	Aniline	[Ani]	0.5	Ammonium persulfate	[APS]	0.5	Graphene	[Gr]	6	Hydrochloric acid	[HCl]	40	1	Dimethyl propylene urea	[C6H12N2O]	0.332	/	[/]	0	/	[/]	0		0	0	0	0	0	0	0	0	0	0	0	0	0	0	0	0	0	0	0	0	0	0	0.137116	1.25396
607	PANI/Gr	Test	Aniline	[Ani]	0.5	Ammonium persulfate	[APS]	0.5	Graphene	[Gr]	6	Hydrochloric acid	[HCl]	40	1	Dimethyl propylene urea	[C6H12N2O]	0.332	/	[/]	0	/	[/]	0		0	0	0	0	0	0	0	0	0	0	0	0	0	0	0	0	0	0	0	0	0	0	0.137116	1.25396
608	PANI/Gr	Training	Aniline	[Ani]	0.5	Ammonium persulfate	[APS]	0.5	Graphene	[Gr]	6	Hydrochloric acid	[HCl]	40	1	Dimethyl propylene urea	[C6H12N2O]	0.332	/	[/]	0	/	[/]	0		0	0	0	0	0	0	0	0	0	0	0	0	0	0	0	0	0	0	0	0	0	0	0.137116	1.25396
609	PANI/Gr	Training	Aniline	[Ani]	0.5	Ammonium persulfate	[APS]	0.5	Graphene	[Gr]	6	Hydrochloric acid	[HCl]	40	1	Dimethyl propylene urea	[C6H12N2O]	0.332	/	[/]	0	/	[/]	0		0	0	0	0	0	0	0	0	0	0	0	0	0	0	0	0	0	0	0	0	0	0	0.137116	1.25396
610	PANI/Gr	Training	Aniline	[Ani]	0.5	Ammonium persulfate	[APS]	0.5	Graphene	[Gr]	6	Hydrochloric acid	[HCl]	40	1	Dimethyl propylene urea	[C6H12N2O]	0.332	/	[/]	0	/	[/]	0		0	0	0	0	0	0	0	0	0	0	0	0	0	0	0	0	0	0	0	0	0	0	0.137116	1.25396
611	PANI/Gr	Training	Aniline	[Ani]	0.5	Ammonium persulfate	[APS]	0.5	Graphene	[Gr]	6	Hydrochloric acid	[HCl]	40	1	Dimethyl propylene urea	[C6H12N2O]	0.332	/	[/]	0	/	[/]	0		0	0	0	0	0	0	0	0	0	0	0	0	0	0	0	0	0	0	0	0	0	0	0.137116	1.25396
612	PANI/Gr	Training	Aniline	[Ani]	0.5	Ammonium persulfate	[APS]	0.5	Graphene	[Gr]	6	Hydrochloric acid	[HCl]	40	1	Dimethyl propylene urea	[C6H12N2O]	0.332	/	[/]	0	/	[/]	0		0	0	0	0	0	0	0	0	0	0	0	0	0	0	0	0	0	0	0	0	0	0	0.137116	1.25396
613	PANI/Gr	Training	Aniline	[Ani]	0.5	Ammonium persulfate	[APS]	0.5	Graphene	[Gr]	6	Hydrochloric acid	[HCl]	40	1	Dimethyl propylene urea	[C6H12N2O]	0.332	/	[/]	0	/	[/]	0		0	0	0	0	0	0	0	0	0	0	0	0	0	0	0	0	0	0	0	0	0	0	0.137116	1.25396
614	PANI/Gr	Training	Aniline	[Ani]	0.5	Ammonium persulfate	[APS]	0.5	Graphene	[Gr]	6	Hydrochloric acid	[HCl]	40	1	Dimethyl propylene urea	[C6H12N2O]	0.332	/	[/]	0	/	[/]	0		0	0	0	0	0	0	0	0	0	0	0	0	0	0	0	0	0	0	0	0	0	0	0.137116	1.25396
615	PANI/Gr	Training	Aniline	[Ani]	0.5	Ammonium persulfate	[APS]	0.5	Graphene	[Gr]	6	Hydrochloric acid	[HCl]	40	1	Dimethyl propylene urea	[C6H12N2O]	0.332	/	[/]	0	/	[/]	0		0	0	0	0	0	0	0	0	0	0	0	0	0	0	0	0	0	0	0	0	0	0	0.137116	1.25396
616	PANI/Gr	Training	Aniline	[Ani]	0.5	Ammonium persulfate	[APS]	0.5	Graphene	[Gr]	6	Hydrochloric acid	[HCl]	40	1	Dimethyl propylene urea	[C6H12N2O]	0.332	/	[/]	0	/	[/]	0		0	0	0	0	0	0	0	0	0	0	0	0	0	0	0	0	0	0	0	0	0	0	0.137116	1.25396
617	PANI/Gr	Training	Aniline	[Ani]	0.5	Ammonium persulfate	[APS]	0.5	Graphene	[Gr]	6	Hydrochloric acid	[HCl]	40	1	Dimethyl propylene urea	[C6H12N2O]	0.332	/	[/]	0	/	[/]	0		0	0	0	0	0	0	0	0	0	0	0	0	0	0	0	0	0	0	0	0	0	0	0.137116	1.25396
618	PANI/Gr	Training	Aniline	[Ani]	0.5	Ammonium persulfate	[APS]	0.5	Graphene	[Gr]	6	Hydrochloric acid	[HCl]	40	1	Dimethyl propylene urea	[C6H12N2O]	0.332	/	[/]	0	/	[/]	0		0	0	0	0	0	0	0	0	0	0	0	0	0	0	0	0	0	0	0	0	0	0	0.137116	1.25396
619	PANI/Gr	Training	Aniline	[Ani]	0.5	Ammonium persulfate	[APS]	0.5	Graphene	[Gr]	6	Hydrochloric acid	[HCl]	40	1	Dimethyl propylene urea	[C6H12N2O]	0.332	/	[/]	0	/	[/]	0		0	0	0	0	0	0	0	0	0	0	0	0	0	0	0	0	0	0	0	0	0	0	0.137116	1.25396
620	PANI/Gr	Test	Aniline	[Ani]	0.5	Ammonium persulfate	[APS]	0.5	Graphene	[Gr]	6	Hydrochloric acid	[HCl]	40	1	Dimethyl propylene urea	[C6H12N2O]	0.332	/	[/]	0	/	[/]	0		0	0	0	0	0	0	0	0	0	0	0	0	0	0	0	0	0	0	0	0	0	0	0.137116	1.25396
621	PANI/Gr	Training	Aniline	[Ani]	0.5	Ammonium persulfate	[APS]	0.5	Graphene	[Gr]	6	Hydrochloric acid	[HCl]	40	1	Dimethyl propylene urea	[C6H12N2O]	0.332	/	[/]	0	/	[/]	0		0	0	0	0	0	0	0	0	0	0	0	0	0	0	0	0	0	0	0	0	0	0	0.137116	1.25396
622	PANI/Gr	Test	Aniline	[Ani]	0.5	Ammonium persulfate	[APS]	0.5	Graphene	[Gr]	6	Hydrochloric acid	[HCl]	40	1	Dimethyl propylene urea	[C6H12N2O]	0.332	/	[/]	0	/	[/]	0		0	0	0	0	0	0	0	0	0	0	0	0	0	0	0	0	0	0	0	0	0	0	0.137116	1.25396
623	PANI/Gr	Training	Aniline	[Ani]	0.5	Ammonium persulfate	[APS]	0.5	Graphene	[Gr]	6	Hydrochloric acid	[HCl]	40	1	Dimethyl propylene urea	[C6H12N2O]	0.332	/	[/]	0	/	[/]	0		0	0	0	0	0	0	0	0	0	0	0	0	0	0	0	0	0	0	0	0	0	0	0.137116	1.25396
624	PANI/Gr	Training	Aniline	[Ani]	0.5	Ammonium persulfate	[APS]	0.5	Graphene	[Gr]	6	Hydrochloric acid	[HCl]	40	1	Dimethyl propylene urea	[C6H12N2O]	0.332	/	[/]	0	/	[/]	0		0	0	0	0	0	0	0	0	0	0	0	0	0	0	0	0	0	0	0	0	0	0	0.137116	1.25396
625	PANI/Gr	Training	Aniline	[Ani]	0.5	Ammonium persulfate	[APS]	0.5	Graphene	[Gr]	6	Hydrochloric acid	[HCl]	40	1	Dimethyl propylene urea	[C6H12N2O]	0.332	/	[/]	0	/	[/]	0		0	0	0	0	0	0	0	0	0	0	0	0	0	0	0	0	0	0	0	0	0	0	0.137116	1.25396
626	PANI/Gr	Training	Aniline	[Ani]	0.5	Ammonium persulfate	[APS]	0.5	Graphene	[Gr]	6	Hydrochloric acid	[HCl]	40	1	Dimethyl propylene urea	[C6H12N2O]	0.332	/	[/]	0	/	[/]	0		0	0	0	0	0	0	0	0	0	0	0	0	0	0	0	0	0	0	0	0	0	0	0.137116	1.25396
627	PANI/Gr	Training	Aniline	[Ani]	0.5	Ammonium persulfate	[APS]	0.5	Graphene	[Gr]	6	Hydrochloric acid	[HCl]	40	1	Dimethyl propylene urea	[C6H12N2O]	0.332	/	[/]	0	/	[/]	0		0	0	0	0	0	0	0	0	0	0	0	0	0	0	0	0	0	0	0	0	0	0	0.137116	1.25396
628	PANI/Gr	Test	Aniline	[Ani]	0.5	Ammonium persulfate	[APS]	0.5	Graphene	[Gr]	8	Hydrochloric acid	[HCl]	40	1	Dimethyl propylene urea	[C6H12N2O]	0.332	/	[/]	0	/	[/]	0		0	0	0	0	0	0	0	0	0	0	0	0	0	0	0	0	0	0	0	0	0	0	0.137116	1.25396
629	PANI/Gr	Test	Aniline	[Ani]	0.5	Ammonium persulfate	[APS]	0.5	Graphene	[Gr]	8	Hydrochloric acid	[HCl]	40	1	Dimethyl propylene urea	[C6H12N2O]	0.332	/	[/]	0	/	[/]	0		0	0	0	0	0	0	0	0	0	0	0	0	0	0	0	0	0	0	0	0	0	0	0.137116	1.25396
630	PANI/Gr	Training	Aniline	[Ani]	0.5	Ammonium persulfate	[APS]	0.5	Graphene	[Gr]	8	Hydrochloric acid	[HCl]	40	1	Dimethyl propylene urea	[C6H12N2O]	0.332	/	[/]	0	/	[/]	0		0	0	0	0	0	0	0	0	0	0	0	0	0	0	0	0	0	0	0	0	0	0	0.137116	1.25396
631	PANI/Gr	Training	Aniline	[Ani]	0.5	Ammonium persulfate	[APS]	0.5	Graphene	[Gr]	8	Hydrochloric acid	[HCl]	40	1	Dimethyl propylene urea	[C6H12N2O]	0.332	/	[/]	0	/	[/]	0		0	0	0	0	0	0	0	0	0	0	0	0	0	0	0	0	0	0	0	0	0	0	0.137116	1.25396
632	PANI/Gr	Training	Aniline	[Ani]	0.5	Ammonium persulfate	[APS]	0.5	Graphene	[Gr]	8	Hydrochloric acid	[HCl]	40	1	Dimethyl propylene urea	[C6H12N2O]	0.332	/	[/]	0	/	[/]	0		0	0	0	0	0	0	0	0	0	0	0	0	0	0	0	0	0	0	0	0	0	0	0.137116	1.25396
633	PANI/Gr	Test	Aniline	[Ani]	0.5	Ammonium persulfate	[APS]	0.5	Graphene	[Gr]	8	Hydrochloric acid	[HCl]	40	1	Dimethyl propylene urea	[C6H12N2O]	0.332	/	[/]	0	/	[/]	0		0	0	0	0	0	0	0	0	0	0	0	0	0	0	0	0	0	0	0	0	0	0	0.137116	1.25396
634	PANI/Gr	Training	Aniline	[Ani]	0.5	Ammonium persulfate	[APS]	0.5	Graphene	[Gr]	8	Hydrochloric acid	[HCl]	40	1	Dimethyl propylene urea	[C6H12N2O]	0.332	/	[/]	0	/	[/]	0		0	0	0	0	0	0	0	0	0	0	0	0	0	0	0	0	0	0	0	0	0	0	0.137116	1.25396
635	PANI/Gr	Training	Aniline	[Ani]	0.5	Ammonium persulfate	[APS]	0.5	Graphene	[Gr]	8	Hydrochloric acid	[HCl]	40	1	Dimethyl propylene urea	[C6H12N2O]	0.332	/	[/]	0	/	[/]	0		0	0	0	0	0	0	0	0	0	0	0	0	0	0	0	0	0	0	0	0	0	0	0.137116	1.25396
636	PANI/Gr	Test	Aniline	[Ani]	0.5	Ammonium persulfate	[APS]	0.5	Graphene	[Gr]	8	Hydrochloric acid	[HCl]	40	1	Dimethyl propylene urea	[C6H12N2O]	0.332	/	[/]	0	/	[/]	0		0	0	0	0	0	0	0	0	0	0	0	0	0	0	0	0	0	0	0	0	0	0	0.137116	1.25396
637	PANI/Gr	Training	Aniline	[Ani]	0.5	Ammonium persulfate	[APS]	0.5	Graphene	[Gr]	8	Hydrochloric acid	[HCl]	40	1	Dimethyl propylene urea	[C6H12N2O]	0.332	/	[/]	0	/	[/]	0		0	0	0	0	0	0	0	0	0	0	0	0	0	0	0	0	0	0	0	0	0	0	0.137116	1.25396
638	PANI/Gr	Training	Aniline	[Ani]	0.5	Ammonium persulfate	[APS]	0.5	Graphene	[Gr]	8	Hydrochloric acid	[HCl]	40	1	Dimethyl propylene urea	[C6H12N2O]	0.332	/	[/]	0	/	[/]	0		0	0	0	0	0	0	0	0	0	0	0	0	0	0	0	0	0	0	0	0	0	0	0.137116	1.25396
639	PANI/Gr	Training	Aniline	[Ani]	0.5	Ammonium persulfate	[APS]	0.5	Graphene	[Gr]	8	Hydrochloric acid	[HCl]	40	1	Dimethyl propylene urea	[C6H12N2O]	0.332	/	[/]	0	/	[/]	0		0	0	0	0	0	0	0	0	0	0	0	0	0	0	0	0	0	0	0	0	0	0	0.137116	1.25396
640	PANI/Gr	Training	Aniline	[Ani]	0.5	Ammonium persulfate	[APS]	0.5	Graphene	[Gr]	8	Hydrochloric acid	[HCl]	40	1	Dimethyl propylene urea	[C6H12N2O]	0.332	/	[/]	0	/	[/]	0		0	0	0	0	0	0	0	0	0	0	0	0	0	0	0	0	0	0	0	0	0	0	0.137116	1.25396
641	PANI/Gr	Training	Aniline	[Ani]	0.5	Ammonium persulfate	[APS]	0.5	Graphene	[Gr]	8	Hydrochloric acid	[HCl]	40	1	Dimethyl propylene urea	[C6H12N2O]	0.332	/	[/]	0	/	[/]	0		0	0	0	0	0	0	0	0	0	0	0	0	0	0	0	0	0	0	0	0	0	0	0.137116	1.25396
642	PANI/Gr	Training	Aniline	[Ani]	0.5	Ammonium persulfate	[APS]	0.5	Graphene	[Gr]	8	Hydrochloric acid	[HCl]	40	1	Dimethyl propylene urea	[C6H12N2O]	0.332	/	[/]	0	/	[/]	0		0	0	0	0	0	0	0	0	0	0	0	0	0	0	0	0	0	0	0	0	0	0	0.137116	1.25396
643	PANI/Gr	Training	Aniline	[Ani]	0.5	Ammonium persulfate	[APS]	0.5	Graphene	[Gr]	8	Hydrochloric acid	[HCl]	40	1	Dimethyl propylene urea	[C6H12N2O]	0.332	/	[/]	0	/	[/]	0		0	0	0	0	0	0	0	0	0	0	0	0	0	0	0	0	0	0	0	0	0	0	0.137116	1.25396
644	PANI/Gr	Training	Aniline	[Ani]	0.5	Ammonium persulfate	[APS]	0.5	Graphene	[Gr]	8	Hydrochloric acid	[HCl]	40	1	Dimethyl propylene urea	[C6H12N2O]	0.332	/	[/]	0	/	[/]	0		0	0	0	0	0	0	0	0	0	0	0	0	0	0	0	0	0	0	0	0	0	0	0.137116	1.25396
645	PANI/Gr	Training	Aniline	[Ani]	0.5	Ammonium persulfate	[APS]	0.5	Graphene	[Gr]	8	Hydrochloric acid	[HCl]	40	1	Dimethyl propylene urea	[C6H12N2O]	0.332	/	[/]	0	/	[/]	0		0	0	0	0	0	0	0	0	0	0	0	0	0	0	0	0	0	0	0	0	0	0	0.137116	1.25396
646	PANI/Gr	Training	Aniline	[Ani]	0.5	Ammonium persulfate	[APS]	0.5	Graphene	[Gr]	8	Hydrochloric acid	[HCl]	40	1	Dimethyl propylene urea	[C6H12N2O]	0.332	/	[/]	0	/	[/]	0		0	0	0	0	0	0	0	0	0	0	0	0	0	0	0	0	0	0	0	0	0	0	0.137116	1.25396
647	PANI/Gr	Training	Aniline	[Ani]	0.5	Ammonium persulfate	[APS]	0.5	Graphene	[Gr]	8	Hydrochloric acid	[HCl]	40	1	Dimethyl propylene urea	[C6H12N2O]	0.332	/	[/]	0	/	[/]	0		0	0	0	0	0	0	0	0	0	0	0	0	0	0	0	0	0	0	0	0	0	0	0.137116	1.25396
648	PANI/Gr	Training	Aniline	[Ani]	0.5	Ammonium persulfate	[APS]	0.5	Graphene	[Gr]	8	Hydrochloric acid	[HCl]	40	1	Dimethyl propylene urea	[C6H12N2O]	0.332	/	[/]	0	/	[/]	0		0	0	0	0	0	0	0	0	0	0	0	0	0	0	0	0	0	0	0	0	0	0	0.137116	1.25396
649	PANI/Gr	Training	Aniline	[Ani]	0.5	Ammonium persulfate	[APS]	0.5	Graphene	[Gr]	8	Hydrochloric acid	[HCl]	40	1	Dimethyl propylene urea	[C6H12N2O]	0.332	/	[/]	0	/	[/]	0		0	0	0	0	0	0	0	0	0	0	0	0	0	0	0	0	0	0	0	0	0	0	0.137116	1.25396
650	PANI/Gr	Training	Aniline	[Ani]	0.5	Ammonium persulfate	[APS]	0.5	Graphene	[Gr]	8	Hydrochloric acid	[HCl]	40	1	Dimethyl propylene urea	[C6H12N2O]	0.332	/	[/]	0	/	[/]	0		0	0	0	0	0	0	0	0	0	0	0	0	0	0	0	0	0	0	0	0	0	0	0.137116	1.25396
651	PANI/Gr	Training	Aniline	[Ani]	0.5	Ammonium persulfate	[APS]	0.5	Graphene	[Gr]	8	Hydrochloric acid	[HCl]	40	1	Dimethyl propylene urea	[C6H12N2O]	0.332	/	[/]	0	/	[/]	0		0	0	0	0	0	0	0	0	0	0	0	0	0	0	0	0	0	0	0	0	0	0	0.137116	1.25396
652	PANI/Gr	Test	Aniline	[Ani]	0.5	Ammonium persulfate	[APS]	0.5	Graphene	[Gr]	8	Hydrochloric acid	[HCl]	40	1	Dimethyl propylene urea	[C6H12N2O]	0.332	/	[/]	0	/	[/]	0		0	0	0	0	0	0	0	0	0	0	0	0	0	0	0	0	0	0	0	0	0	0	0.137116	1.25396
653	PANI/Gr	Test	Aniline	[Ani]	0.5	Ammonium persulfate	[APS]	0.5	Graphene	[Gr]	8	Hydrochloric acid	[HCl]	40	1	Dimethyl propylene urea	[C6H12N2O]	0.332	/	[/]	0	/	[/]	0		0	0	0	0	0	0	0	0	0	0	0	0	0	0	0	0	0	0	0	0	0	0	0.137116	1.25396
654	PANI/Gr	Test	Aniline	[Ani]	0.5	Ammonium persulfate	[APS]	0.5	Graphene	[Gr]	8	Hydrochloric acid	[HCl]	40	1	Dimethyl propylene urea	[C6H12N2O]	0.332	/	[/]	0	/	[/]	0		0	0	0	0	0	0	0	0	0	0	0	0	0	0	0	0	0	0	0	0	0	0	0.137116	1.25396
655	PANI/Gr	Training	Aniline	[Ani]	0.5	Ammonium persulfate	[APS]	0.5	Graphene	[Gr]	8	Hydrochloric acid	[HCl]	40	1	Dimethyl propylene urea	[C6H12N2O]	0.332	/	[/]	0	/	[/]	0		0	0	0	0	0	0	0	0	0	0	0	0	0	0	0	0	0	0	0	0	0	0	0.137116	1.25396
656	PANI/Gr	Test	Aniline	[Ani]	0.5	Ammonium persulfate	[APS]	0.5	Graphene	[Gr]	8	Hydrochloric acid	[HCl]	40	1	Dimethyl propylene urea	[C6H12N2O]	0.332	/	[/]	0	/	[/]	0		0	0	0	0	0	0	0	0	0	0	0	0	0	0	0	0	0	0	0	0	0	0	0.137116	1.25396
657	PANI	Training	Aniline	[Ani]	0.0002	Ammonium persulfate	[APS]	0.0002	/	[/]	0	Hydrochloric acid	[HCl]	30	1	/	[/]	0	/	[/]	0	/	[/]	0		0	0	0	0	0	0	0	0	0	0	0	0	0	0	0	0	0	0	0	0	0	0	0	0
658	PANI/rGO-SnO2	Training	Aniline	[Ani]	0.001	Ammonium persulfate	[APS]	0.001	reduced graphene oxide	[rGO]	0.5	Hydrochloric acid	[HCl]	2.5	1	Water	[H2O]	2.7778	Sodium hydroxide	[NaOH]	0.1	Tin(IV) oxide	[SnO2]	0.0066		0	0	0	0	0	0	0	0.1167	0.4469	0.6356	0.4576	0.2732	0.528603	1.79379	5.47673	8.81895	6.98295	4.79766	6.04659	5.04585	3.08033	3.66754	3.25579	1.68062
659	PANI/rGO-SnO2	Training	Aniline	[Ani]	0.001	Ammonium persulfate	[APS]	0.001	reduced graphene oxide	[rGO]	0.5	Hydrochloric acid	[HCl]	2.5	1	Water	[H2O]	2.7778	Sodium hydroxide	[NaOH]	0.1	Tin(IV) oxide	[SnO2]	0.0066		0	0	0	0	0	0	0	0.1167	0.4469	0.6356	0.4576	0.2732	0.528603	1.79379	5.47673	8.81895	6.98295	4.79766	6.04659	5.04585	3.08033	3.66754	3.25579	1.68062
[truncated: 46 more columns]

## Sheet: Table S3
		Table S3. Types of input variables used in data mining for machine learning modeling of polyaniline/graphene nanocomposites.
			Inputs	Abbreviation	Type
		Matrix	Aniline amount (mmol)	Cani	Numerical
			Amount of oxidant (mmol)	COxi	Numerical
			Doping agent	TypeDop	Categorical
			Volume of doping agent (mL)	VDop	Numerical
			Concentration of doping agent (M)	CDop	Numerical
			Additives (σ-profiles)	σ-profiles	Numerical
		Filler	Graphene type	TypeGr	Categorical
			Graphene loading	CGr	Numerical
		Synthesis conditions	Temperature (K)	TSyn	Numerical
			Time (h)	tSyn	Numerical
		Operating conditions	Temperature (K)	TOp	Numerical
			Gas concentration (ppm)	CGas	Numerical

## Sheet: Table S4
	Table S4. Numerical values of σProfile for additives.
	Additives		-0.03	-0.029	-0.028	-0.027	-0.026	-0.025	-0.024	-0.023	-0.022	-0.021	-0.02	-0.019	-0.018	-0.017	-0.016	-0.015	-0.014	-0.013	-0.012	-0.011	-0.01	-0.009	-0.008	-0.007	-0.006	-0.005	-0.004	-0.003	-0.002	-0.001	0	0.001	0.002	0.003	0.004	0.005	0.006	0.007	0.008	0.009	0.01	0.011	0.012	0.013	0.014	0.015	0.016
1	Acetone	[C3H6O]	0	0	0	0	0	0	0	0	0	0	0	0	0	0	0	0	0	0	0	0	0	0.346	2.915	7.67	9.641	8.847	8.254	6.727	6.85	9.711	9.574	5.264	2.167	1.214	0.379	0.125	0.352	0.583	0.966	1.126	1.637	2.951	3.675	3.184	2.339	1.841	1.113
2	Ammonia solution	[NH4OH]	0	0	0	0	0	0	0	0	0	0	0	0	0	0	0.063	0.391	0.9	1.954	4.033	5.364	5.157	4.649	4.336	4.029	2.939	1.926	1.806	1.666	1.517	1.708	1.876	1.83	1.793	1.765	1.882	2.039	1.57	0.863	0.673	0.769	1.081	1.727	1.923	1.383	1.161	1.36	1.509
3	Ammonium persulfate	[APS]	0	0	0	0	0	0	0	0	0.305	3.529	14.629	22.004	14.168	6.266	5.043	4.357	3.484	2.399	1.394	0.798	0.78	0.734	0.437	0.329	0.314	0.308	0.414	0.556	0.578	0.865	1.608	2.081	1.988	1.737	1.75	2.131	3.086	4.878	7.518	12.215	18.995	24.884	25.534	18.062	8.273	2.951	0.917
4	Cerium dioxide	[CeO2]	0	0	0	0	0	0	0	0	0	0	0.224	1.887	6.629	8.8	4.142	1.003	3.474	4.861	3.075	2.396	1.814	0.411	0.32	1.647	2.333	1.007	0.832	2.438	2.379	0.773	0	0	0	0	0	0	0	0	0.219	1.545	2.578	1.393	0.143	0	0.967	3.777	5.995
5	Cetyltrimethylammonium bromide	[CTAB]	0	0	0	0	0	0	0	0	0	0	0	0	0	0	0.05	0.184	0.585	1.212	2.163	4.136	7.093	10.143	11.38	9.872	9.939	14.92	27.039	45.883	54.933	47.343	38.055	33.773	32.489	26.193	11.763	1.948	0.269	0.301	0.208	0.058	0.001	0.003	0.146	1.187	8.542	18.058	14.686
6	Chloroform	[CHCl3]	0	0	0	0	0	0	0	0	0	0	0	0	0	0	0	0	0.226	1.379	2.495	1.946	1.218	1.333	1.131	1.238	2.542	3.671	4.663	5.647	5.861	6.827	8.128	9.195	14.183	21.071	17.597	5.94	0.201	0	0	0	0	0	0	0	0	0	0
7	Dimethyl propylene urea	[C6H12N2O]	0	0	0	0	0	0	0	0	0	0	0	0	0	0	0	0	0	0	0	0	0	0	0.413	3.777	11.808	19.163	19.401	15.488	14.064	14.017	10.947	6.11	3.018	2.285	2.414	2.278	2.037	1.953	1.801	1.434	1.007	0.765	0.805	1.858	4.13	4.988	3.347
8	Dimethylformamide	[C3H7NO]	0	0	0	0	0	0	0	0	0	0	0	0	0	0	0	0	0	0	0	0.007	0.152	0.979	2.914	6.848	11.435	11.83	8.566	8.28	11.372	11.31	7.922	5.243	3.388	1.791	0.734	0.64	1.043	1.008	0.537	0.343	0.683	1.037	1.649	3.209	4.355	3.818	2.453
9	Ethanol	[C2H5OH]	0	0	0	0	0	0	0	0	0	0	0	0	0.102	0.525	1.074	1.088	0.642	0.665	0.944	0.754	0.409	0.261	0.45	0.936	2.359	5.647	8.58	9.15	8.199	6.472	5.786	6.789	6.221	3.266	1.234	0.82	1.006	1.231	1.03	0.731	0.563	0.728	1.263	1.636	1.673	1.917	1.915
10	Ethyl ether	[(C2H5)2O]	0	0	0	0	0	0	0	0	0	0	0	0	0	0	0	0	0	0	0	0	0	0	0	0.057	1.375	7.216	15.043	18.831	17.793	14.188	12.437	13.347	11.424	5.406	1.498	0.727	0.714	1.121	0.767	0.225	0.187	0.512	1.236	1.611	1.094	1.161	1.78
11	Ethylene glycol	[C2H6O2]	0	0	0	0	0	0	0	0	0	0	0	0.022	0.415	0.943	1.087	1.355	1.576	1.339	1.282	1.418	1.313	1.193	1.404	3.23	7.174	9.52	8.273	6.039	4.256	3.553	3.537	3.098	2.778	2.617	2.113	1.395	0.998	1.286	1.692	1.691	1.83	2.294	2.578	2.893	3.408	3.473	2.465
12	Glycerol	[C3H8O3]	0	0	0	0	0	0	0	0	0	0	0.048	0.203	0.818	1.792	2.231	2.004	1.833	1.945	1.938	1.91	2.287	2.56	2.672	5.382	10.069	11.349	8.817	5.914	4.148	3.467	3.005	2.741	2.715	2.289	2.338	2.703	2.208	1.743	2.045	2.353	2.287	2.783	3.552	3.973	4.736	4.938	3.563
13	Hexane	[C6H14]	0	0	0	0	0	0	0	0	0	0	0	0	0	0	0	0	0	0	0	0	0	0	0	0	0.037	1.366	7.638	16.525	21.52	22.023	19.339	19.381	22.948	18.397	6.98	0.772	0	0	0	0	0	0	0	0	0	0	0
14	Hydrazine monohydrate	[N2H4.H2O]	0	0	0	0	0	0	0	0	0	0	0	0	0	0	0.133	0.538	0.961	2.318	5.359	7.602	7.385	6.043	4.727	3.917	3.552	3.033	2.254	1.542	1.242	1.196	1.249	1.814	2.304	2.143	1.877	1.636	1.347	1.164	1.124	1.317	2.054	2.51	1.884	1.221	1.47	2.368	2.712
15	Hydrochloric acid	[HCl]	0	0	0	0	0	0	0	0	0	0	0	0.002	0.363	1.227	1.86	1.548	0.751	0.734	0.946	0.409	0.053	0.213	0.269	0.108	0.414	1.437	2.037	1.607	1.851	2.61	2.059	2.27	4.032	4.454	4.894	7.928	7.838	2.884	0.065	0	0	0	0	0	0	0	0
16	Indium oxide	[In2O3]	0	0	0	0	0	0	0	0	0	0.129	1.144	2.293	2.26	2.741	6.641	10.635	9.766	7.522	5.814	4.152	4.24	3.917	2.281	2.808	3.967	2.323	0.79	1.567	2.041	1.009	0.425	1.021	1.339	1.513	2.27	2.166	1.539	1.077	0.365	0.009	0.333	0.86	1.044	1.105	1.711	3.269	4.89
17	Iodine	[I2]	0	0	0	0	0	0	0	0	0	0	0	0	0	0	0	0	0	0	0.117	1.21	2.217	1.832	2.17	3.509	3.196	1.318	2.86	5.21	3.775	3.691	8.892	15.222	19.813	19.758	9.868	1.156	0	0	0	0	0	0	0	0	0	0	0
18	Isopropyl alcohol	[C3H8O]	0	0	0	0	0	0	0	0	0	0	0	0	0.03	0.383	0.853	0.903	0.851	0.906	0.788	0.439	0.282	0.447	0.581	0.7	2.547	7.066	11.05	11.274	9.301	7.706	6.99	9.133	9.866	5.484	2.345	1.543	0.698	0.443	0.769	0.922	0.524	0.604	1.487	1.892	1.435	1.551	2.03
19	m-cresol	[C7H8O]	0	0	0	0	0	0	0	0	0	0.035	0.154	0.591	1.154	1.039	0.785	0.891	0.847	0.885	0.929	0.723	0.472	0.566	1.499	4.14	8.118	10.532	10.688	9.473	6.526	5.6	9.154	10.85	8.984	8.465	8.624	7.99	7.34	6.484	4.878	2.835	1.764	1.742	1.822	1.302	0.402	0	0
20	Methanol	[CH3OH]	0	0	0	0	0	0	0	0	0	0	0	0	0.018	0.476	1.121	1.125	1.086	1.108	0.683	0.335	0.205	0.359	1.019	1.466	2.457	5.252	6.944	5.64	4.607	4.98	4.44	3.381	2.588	1.389	0.634	0.918	1.337	1.132	0.788	0.762	0.822	0.921	1.182	1.682	2.025	2.038	1.741
21	N-Methyl-2-pyrrolidone	[C5H9NO]	0	0	0	0	0	0	0	0	0	0	0	0	0	0	0	0	0	0	0	0	0	0	0.222	3.35	10.53	16.795	17.342	14.756	13.773	13.165	10.598	6.277	2.872	2.299	2.577	1.987	1.031	0.508	0.332	0.194	0.334	1.043	1.622	2.201	3.632	4.373	3.304
22	sodium 4-dodecylbenzenesulfonic acid	[SDBS]	0	0	0	0	0	0	0.352	2.886	5.771	5.098	2.854	1.452	1.053	1.071	0.774	0.768	1.131	1.244	1.041	1.143	1.442	1.444	2.755	5.753	7.852	9.742	18.593	34.538	43.753	41.763	38.308	36.599	34.243	29.361	20.844	14.435	10.622	5.219	2.231	2.341	2.765	4.166	6.266	7.468	6.457	3.457	1.283
23	sodium dodecylsulfate	[SDS]	0	0	0	0	0.013	1.278	6.266	9.791	6.266	2.004	0.731	0.338	0.382	0.803	1.117	0.9	0.53	0.361	0.319	0.266	0.196	0.12	0.081	0.172	1.172	4.974	15.682	32.07	42.017	39.64	33.631	30.096	27.152	21.462	11.692	3.635	1.088	1.261	2.45	3.471	4.555	6.874	9.936	13.213	12.882	6.875	1.455
24	Sodium hydroxide	[NaOH]	0	0	0	0	0	0	0	1.167	4.469	6.356	4.576	2.732	2.036	1.16	0.878	1.411	1.313	0.444	0	0.06	0.441	0.805	1.235	1.697	1.107	0.502	0.693	1.019	1.27	1.124	0.824	0.548	0.243	0.252	0.647	0.875	0.684	0.452	0.478	0.478	0.239	0.143	0.25	0.329	0.298	0.248	0.344
25	Sorbitan monooleate	[SMO]	0	0	0	0	0	0	0	0	0.172	0.531	1.143	2.075	2.741	2.985	2.774	2.358	2.098	1.816	1.946	2.104	2.04	2.332	3.305	6.852	12.505	18.62	31.396	49.611	57.275	51.112	43.065	40.877	41.64	33.78	18.082	9.128	7.996	7.663	7.405	7.936	8.655	9.252	8.629	6.337	4.447	2.807	1.081
26	Sulferic acid	[H2SO4]	0	0	0	0	0	0	0.186	0.977	2.311	3.104	2.549	1.499	1.198	1.478	1.461	0.924	0.404	0.316	0.417	0.707	1.186	1.345	1.206	0.95	0.681	0.703	0.988	1.832	2.675	2.888	3.46	3.508	3.036	3.827	4.146	4.393	8.782	14.515	13.534	6.565	1.314	0	0	0	0	0	0
27	Tetrachloromethane	[CCl4]	0	0	0	0	0	0	0	0	0	0	0	0	0	0	0	0	0	0	0	0	0	0.251	0.874	3.608	5.975	3.611	4.936	9.596	8.288	7.515	13.026	23.276	28.999	19.532	5.29	0	0	0	0	0	0	0	0	0	0	0	0
28	Tin(IV) oxide	[SnO2]	0	0	0	0	0	0	0	0	0	0	0	0	0	0	0	0	1.084	5.539	9.577	6.873	3.381	4.766	5.309	3.757	2.503	0.918	1.296	2.897	1.904	0.304	0	2.194	4.493	2.403	0.105	0	0	0.01	0.54	2.433	5.285	7.404	8.454	7.866	4.455	1.022	0
29	Titanium dioxide	[TiO2]	0	0	0	0	0	0	0.745	2.183	4.917	6.745	3.746	0.48	0	0.779	3.157	3.975	1.598	0	0.954	2.152	1.441	0.243	0.369	1.294	1.483	1.38	1.707	0.946	0.062	0	0	0	0	0.399	1.336	1.495	0.577	1.07	2.745	2.337	0.643	0	0.323	2.073	3.387	2.521	4.002
30	Vanadium oxide	[V2O5]	0	0	0	0	0	0	0	0.062	1.02	2.151	2.432	2.857	3.4	3.199	3.234	4.146	3.642	2.736	2.963	2.426	1.877	2.278	2.397	1.764	1.243	1.64	2.026	2.603	3.532	3.407	2.744	2.585	2.721	2.81	4.068	5.46	4.799	5.029	11.575	19.331	16.907	7.671	1.58	0.007	0	0	0
31	Water	[H2O]	0	0	0	0	0	0	0	0	0	0	0	0	0.117	0.604	1.94	3.124	2.464	1.698	2.154	1.798	1.085	1.28	1.115	0.535	0.294	0.292	0.377	0.581	0.833	0.751	0.414	0.3	0.328	0.748	1.321	1.046	0.798	0.984	0.65	0.881	1.398	1.242	1.394	1.379	1.573	2.44	2.505
32	Xylene	[C₈H₁₀]	0	0	0	0	0	0	0	0	0	0	0	0	0	0	0	0	0	0	0	0	0	0	0.132	2.596	8.917	14.904	15.361	12.245	9.202	7.579	11.593	15.715	12.034	8.335	8.139	7.019	5.856	5.468	4.534	2.546	0.638	0	0	0	0	0	0
33	Zinc oxide	[ZnO]	0	0	0	0	0	0	0	0	0	0	0.14	0.99	2.473	3.483	3.532	3.148	3.433	3.308	2.778	2.909	2.304	2.259	2.262	0.869	1.333	2.875	1.933	0.345	0	0	0.593	1.782	1.784	0.595	0.082	0.681	1.115	0.517	0.163	0.626	0.762	0.55	0.693	0.785	0.705	1.046	1.428
[truncated: 14 more columns]

## Sheet: Table S5
	Table S5. Detailed mathematical description of the equations used.
	Electrical Conductivity
	Eq. A1	tanh(.5*(3.86678105047668*MonoMol + -0.516118471716677*((OxiType="[(NH4)2S2O8]")-(OxiType="[K2S2O8]")) + 3.34794223183082*OxiMol + 0.84059509553092*((NFType="[/]")-(NFType="[rGO]")) + -1.33391577178391*((NFType="[GO]")-(NFType="[rGO]")) + -1.94390498813791*((NFType="[Gr]")-(NFType="[rGO]")) + 0.161914086023856*NFwt + -11.3241745107598*((DopType="[/]")-(DopType="[HCOOH]")) + 4.80876044780526*((Dop…
	Eq. A2	H2 = tanh(.5*(2.13448121272957*MonoMol + -0.309447433767678*((OxiType="[(NH4)2S2O8]")-(OxiType="[K2S2O8]")) + -0.861237827054675*OxiMol + 1.98346185477904*((NFType="[/]")-(NFType="[rGO]")) + 2.50932671329729*((NFType="[GO]")-(NFType="[rGO]")) + 1.17799098306273*((NFType="[Gr]")-(NFType="[rGO]")) + 0.120254259490577*NFwt + -0.332110530646893*((DopType="[/]")-(DopType="[HCOOH]")) + 3.67040542266894…
	Eq. A3	H3 = tanh(.5*(0.231525277415127*MonoMol + 1.3925745221748*((OxiType="[(NH4)2S2O8]")-(OxiType="[K2S2O8]")) + -3.31971889257053*OxiMol + 0.938393127531644*((NFType="[/]")-(NFType="[rGO]")) + -2.41025740708354*((NFType="[GO]")-(NFType="[rGO]")) + 3.93151818947851*((NFType="[Gr]")-(NFType="[rGO]")) + -0.00986001984706273*NFwt + -1.02443909143592*((DopType="[/]")-(DopType="[HCOOH]")) + 6.4062108141986…
	Eq. A4	H4 = tanh(.5*(-0.359339754755648*MonoMol + -0.297105694172933*((OxiType="[(NH4)2S2O8]")-(OxiType="[K2S2O8]")) + -2.08153166516743*OxiMol + -2.04286062348428*((NFType="[/]")-(NFType="[rGO]")) + -0.7090814089165*((NFType="[GO]")-(NFType="[rGO]")) + -1.51713404923419*((NFType="[Gr]")-(NFType="[rGO]")) + -0.363934954126699*NFwt + -4.38104890314632*((DopType="[/]")-(DopType="[HCOOH]")) + 6.42527643874…
	Eq. A5	H5 = tanh(.5*(0.310799158305573*MonoMol + 0.526115817478622*((OxiType="[(NH4)2S2O8]")-(OxiType="[K2S2O8]")) + -2.79957844810078*OxiMol + 4.15647767326866*((NFType="[/]")-(NFType="[rGO]")) + 0.302544456476845*((NFType="[GO]")-(NFType="[rGO]")) + -1.45994612147069*((NFType="[Gr]")-(NFType="[rGO]")) + 0.271909045087628*NFwt + 6.35152961914662*((DopType="[/]")-(DopType="[HCOOH]")) + -0.70456573344954…
	Eq. A6	H6 = tanh(.5*(1.1043379683942*MonoMol + 0.199389732713405*((OxiType="[(NH4)2S2O8]")-(OxiType="[K2S2O8]")) + 9.70663444704286*OxiMol + -4.51596690854259*((NFType="[/]")-(NFType="[rGO]")) + 5.93007460283305*((NFType="[GO]")-(NFType="[rGO]")) + 0.111318666495327*((NFType="[Gr]")-(NFType="[rGO]")) + 0.166907877912692*NFwt + 1.83322313100166*((DopType="[/]")-(DopType="[HCOOH]")) + 3.10171894428482*((D…
	Eq. A7	H7 = tanh(.5*(-1.00074836771561*MonoMol + -1.31238565529654*((OxiType="[(NH4)2S2O8]")-(OxiType="[K2S2O8]")) + 1.03646681788229*OxiMol + -1.77889542940267*((NFType="[/]")-(NFType="[rGO]")) + -1.58160603626004*((NFType="[GO]")-(NFType="[rGO]")) + -0.879157548978747*((NFType="[Gr]")-(NFType="[rGO]")) + -0.402475207990728*NFwt + -8.61951487525408*((DopType="[/]")-(DopType="[HCOOH]")) + -6.51439788504…
	Eq. A8	H8 = tanh(.5*(1.22675659398631*MonoMol + -2.86893088872929*((OxiType="[(NH4)2S2O8]")-(OxiType="[K2S2O8]")) + -3.38508903438491*OxiMol + 0.24416799142605*((NFType="[/]")-(NFType="[rGO]")) + 0.380684411155499*((NFType="[GO]")-(NFType="[rGO]")) + -0.0976262007955411*((NFType="[Gr]")-(NFType="[rGO]")) + 0.239735315410193*NFwt + -6.226897413229*((DopType="[/]")-(DopType="[HCOOH]")) + 2.16692904324814*…
	Eq. A9	H9 = tanh(.5*(0.435847367679935*MonoMol + -0.0274326259576108*((OxiType="[(NH4)2S2O8]")-(OxiType="[K2S2O8]")) + 4.51799758233497*OxiMol + 1.10905062545671*((NFType="[/]")-(NFType="[rGO]")) + 2.05357345161589*((NFType="[GO]")-(NFType="[rGO]")) + -1.22226111074841*((NFType="[Gr]")-(NFType="[rGO]")) + -0.0630795095239396*NFwt + -2.70225382362256*((DopType="[/]")-(DopType="[HCOOH]")) + -3.04659415770…
	Eq. A10	H10 = tanh(.5*(-2.03938646237713*MonoMol + 1.19001202386744*((OxiType="[(NH4)2S2O8]")-(OxiType="[K2S2O8]")) + -7.14058526912782*OxiMol + 2.7650579943401*((NFType="[/]")-(NFType="[rGO]")) + 2.72623696815421*((NFType="[GO]")-(NFType="[rGO]")) + -2.31530862867115*((NFType="[Gr]")-(NFType="[rGO]")) + -0.182396247668769*NFwt + 12.616083150537*((DopType="[/]")-(DopType="[HCOOH]")) + -7.15672216404253*(…
	Eq. A11	H11 = tanh(.5*(1.0768903480084*MonoMol + -0.439941148935667*((OxiType="[(NH4)2S2O8]")-(OxiType="[K2S2O8]")) + -3.64057523167792*OxiMol + 0.887243412562242*((NFType="[/]")-(NFType="[rGO]")) + 0.706796775949233*((NFType="[GO]")-(NFType="[rGO]")) + -2.12145678741548*((NFType="[Gr]")-(NFType="[rGO]")) + -0.000344791755397457*NFwt + 5.4974781286435*((DopType="[/]")-(DopType="[HCOOH]")) + 0.63979840483…
	Eq. A12	H12 = tanh(.5*(-0.239750628955038*MonoMol + -3.51217450239466*((OxiType="[(NH4)2S2O8]")-(OxiType="[K2S2O8]")) + -3.2821186294888*OxiMol + -0.0712699598540088*((NFType="[/]")-(NFType="[rGO]")) + 2.10716818305268*((NFType="[GO]")-(NFType="[rGO]")) + 0.326569338051197*((NFType="[Gr]")-(NFType="[rGO]")) + 0.289436789555181*NFwt + 7.36821488641602*((DopType="[/]")-(DopType="[HCOOH]")) + 7.634995098961…
	Eq. A13	H13 = tanh(.5*(-1.20547489545878*MonoMol + 1.2325135067751*((OxiType="[(NH4)2S2O8]")-(OxiType="[K2S2O8]")) + 1.67463056865428*OxiMol + -2.17654311053295*((NFType="[/]")-(NFType="[rGO]")) + -1.21215977086627*((NFType="[GO]")-(NFType="[rGO]")) + 2.63496021926259*((NFType="[Gr]")-(NFType="[rGO]")) + -0.262859356096944*NFwt + -1.63781617997125*((DopType="[/]")-(DopType="[HCOOH]")) + 1.85251908476219*…
	Eq. A14	H14 = tanh(.5*(0.752654106929759*MonoMol + -2.35776227100802*((OxiType="[(NH4)2S2O8]")-(OxiType="[K2S2O8]")) + -4.98337401279564*OxiMol + -1.95817676120478*((NFType="[/]")-(NFType="[rGO]")) + 2.13145618961594*((NFType="[GO]")-(NFType="[rGO]")) + 1.87188235414654*((NFType="[Gr]")-(NFType="[rGO]")) + -0.138935284159785*NFwt + -4.70225899051053*((DopType="[/]")-(DopType="[HCOOH]")) + -0.382564046511…
	Eq. A15	H15 = tanh(.5*(0.955479206029771*MonoMol + -0.221572720326524*((OxiType="[(NH4)2S2O8]")-(OxiType="[K2S2O8]")) + -0.638028384683694*OxiMol + 1.0147856602361*((NFType="[/]")-(NFType="[rGO]")) + -0.0568276572853905*((NFType="[GO]")-(NFType="[rGO]")) + -0.883050194955361*((NFType="[Gr]")-(NFType="[rGO]")) + -0.110242650561119*NFwt + 3.62497679786014*((DopType="[/]")-(DopType="[HCOOH]")) + -5.32989097…
	Eq. A16	H16 = tanh(.5*(-1.89947235563967*MonoMol + 0.608582089940406*((OxiType="[(NH4)2S2O8]")-(OxiType="[K2S2O8]")) + 3.7823300874537*OxiMol + 0.5827510769195*((NFType="[/]")-(NFType="[rGO]")) + 0.790336253896152*((NFType="[GO]")-(NFType="[rGO]")) + -2.93032618806704*((NFType="[Gr]")-(NFType="[rGO]")) + -0.107146601681785*NFwt + -0.791545419246614*((DopType="[/]")-(DopType="[HCOOH]")) + -3.5031116952365…
	Eq. A17	H17 = tanh(.5*(-0.351016621308957*MonoMol + -1.10434032822195*((OxiType="[(NH4)2S2O8]")-(OxiType="[K2S2O8]")) + -0.18734364160996*OxiMol + -1.90347623613623*((NFType="[/]")-(NFType="[rGO]")) + -0.765575434096544*((NFType="[GO]")-(NFType="[rGO]")) + 0.853891758471044*((NFType="[Gr]")-(NFType="[rGO]")) + 0.0898427584158349*NFwt + 8.52700891554978*((DopType="[/]")-(DopType="[HCOOH]")) + 3.7725351998…
	Eq. A18	H18 = tanh(.5*(-1.76971190787816*MonoMol + 1.56170477272416*((OxiType="[(NH4)2S2O8]")-(OxiType="[K2S2O8]")) + -4.4536768916177*OxiMol + 1.36592609997347*((NFType="[/]")-(NFType="[rGO]")) + 3.32603402913504*((NFType="[GO]")-(NFType="[rGO]")) + -1.01883500819178*((NFType="[Gr]")-(NFType="[rGO]")) + 0.0672131797324699*NFwt + 2.12982420105087*((DopType="[/]")-(DopType="[HCOOH]")) + -2.36516201828005*…
	Eq. A19	H19 = tanh(.5*(-3.42350992232677*MonoMol + 1.07658910982703*((OxiType="[(NH4)2S2O8]")-(OxiType="[K2S2O8]")) + -3.17546458874706*OxiMol + -0.0616445904183828*((NFType="[/]")-(NFType="[rGO]")) + 0.806057282667407*((NFType="[GO]")-(NFType="[rGO]")) + -1.26507782945426*((NFType="[Gr]")-(NFType="[rGO]")) + 0.0537890383968431*NFwt + -9.52957832655143*((DopType="[/]")-(DopType="[HCOOH]")) + -2.695642023…
	Eq. A20	H20 = tanh(.5*(-2.40983291735841*MonoMol + -0.322494760532803*((OxiType="[(NH4)2S2O8]")-(OxiType="[K2S2O8]")) + -6.70978366236403*OxiMol + -1.15108329325433*((NFType="[/]")-(NFType="[rGO]")) + -3.27342430874784*((NFType="[GO]")-(NFType="[rGO]")) + -2.34005478695562*((NFType="[Gr]")-(NFType="[rGO]")) + 0.0454820622602292*NFwt + 7.45824181220899*((DopType="[/]")-(DopType="[HCOOH]")) + 1.08052955058…
	Eq. A21	HH1 = tanh(.5*(2.38559209307237*H1 + -0.50993240527703*H2 + -1.46064128967838*H3 + 1.44682300190568*H4 + -0.147976336519878*H5 + -0.299752388913606*H6 + 0.0388863138903935*H7 + 1.3370713268691*H8 + -0.00522324297160343*H9 + 1.37521927765145*H10 + -0.483089663138358*H11 + 0.785557878480029*H12 + -0.165439439425205*H13 + 1.63790471462491*H14 + -0.47814114198602*H15 + 1.19500852951423*H16 + -0.41190…
	Eq. A22	HH2 = tanh(.5*(0.993064416751893*H1 + 0.101195147952116*H2 + -0.438961418425496*H3 + 0.232459075184564*H4 + -2.31528415116058*H5 + 0.766488201699772*H6 + 0.104649049109656*H7 + 2.20312597768358*H8 + -1.87582284349917*H9 + 0.484902476870454*H10 + 0.23422268934261*H11 + 0.496262792850115*H12 + 1.29095502913483*H13 + 0.457742624598586*H14 + -0.312632600140543*H15 + 0.377683390400835*H16 + -1.8052243…
	Eq. A23	HH3 = tanh(.5*(0.507393826216953*H1 + -0.0174586115447879*H2 + 0.343850010738626*H3 + -0.538652832924067*H4 + 1.53998378166823*H5 + 0.0394532063443176*H6 + -0.00076667008395776*H7 + -0.461278665048155*H8 + 0.438136043603817*H9 + 0.687253262362125*H10 + 0.816502644986452*H11 + -1.5625195025179*H12 + 2.17772484765965*H13 + -1.88336781059723*H14 + 1.30153575666783*H15 + -2.27920825178833*H16 + 1.263…
	Eq. A24	HH4 = tanh(.5*(-1.67794664653736*H1 + 2.26656864168516*H2 + 0.311736305504261*H3 + 0.530562672962785*H4 + 0.912307277968067*H5 + -0.101228035247853*H6 + 0.0475793040120418*H7 + 0.475112212462971*H8 + 1.65103074310859*H9 + -0.601796329992902*H10 + 0.153498949936815*H11 + -0.482798288544017*H12 + -0.00868260891453668*H13 + -1.05631385584893*H14 + 1.31941557789911*H15 + -1.38956438849434*H16 + 0.560…
	Eq. A25	HH5 = tanh(.5*(-0.241899352741186*H1 + 0.129542494213171*H2 + -3.69916974645376*H3 + -1.22148986081826*H4 + -1.11402279788758*H5 + 1.09417059249405*H6 + 2.0786110902868*H7 + 0.6478474291036*H8 + 1.08551462598433*H9 + 0.0316458947040124*H10 + 0.808460135030888*H11 + -0.655302181552501*H12 + 0.856762098765707*H13 + 0.135371542455088*H14 + -1.5687115057191*H15 + 1.03922158464929*H16 + -1.24979829321…
	Eq. A26	HH6 = tanh(.5*(2.63046523050876*H1 + 2.70935825889567*H2 + -0.0972942222662729*H3 + -0.818636740490758*H4 + 0.116132530012285*H5 + 1.49477021562186*H6 + 0.664348964779583*H7 + -0.0504127854362886*H8 + 1.75810920785017*H9 + -0.464930431488747*H10 + 3.39639898332936*H11 + 0.0457862298954508*H12 + -2.22747324505255*H13 + 1.07273873718803*H14 + 0.870784883335595*H15 + -0.129945322773155*H16 + 0.95982…
	Eq. A27	HH7 = tanh(.5*(-1.09355407232643*H1 + 0.48998441516029*H2 + 0.0742227086496267*H3 + 2.34408520752869*H4 + 0.681580907579188*H5 + -0.634293990490189*H6 + 1.18940565843791*H7 + -1.15150150080107*H8 + 1.70698629644911*H9 + 2.22852243070721*H10 + 0.955982090104774*H11 + -1.9773512520977*H12 + -0.152166495580666*H13 + -1.86854772916367*H14 + 1.26812353679699*H15 + 1.23587454915042*H16 + 0.133661142838…
	Eq. A28	HH8 = tanh(.5*(-0.0875327804809587*H1 + 0.296823026101852*H2 + 0.530611528570361*H3 + -0.957501279102078*H4 + 2.35239485546817*H5 + -1.95485348409461*H6 + -1.02008973403109*H7 + -0.331124948114504*H8 + 1.19703177875088*H9 + 0.994519598103751*H10 + -0.565398436305866*H11 + -0.890275470787236*H12 + -1.18431480982308*H13 + 1.02728759570829*H14 + -1.99801226164086*H15 + -1.19236903541841*H16 + 1.0116…
	Eq. A29	HH9 = tanh(.5*(-0.504361308618681*H1 + -0.994221370635234*H2 + -0.163374862732183*H3 + 1.34339088797276*H4 + -2.8786104265952*H5 + -0.733252808902736*H6 + -0.620510840517846*H7 + 2.80121490503027*H8 + 1.43854201707598*H9 + -0.03391170171703*H10 + -0.551963643503279*H11 + -0.351483438577572*H12 + 0.766366441789462*H13 + 1.42437119830702*H14 + 0.249073169997581*H15 + 0.587552957365605*H16 + 1.29936…
	Eq. A30	HH10 = tanh(.5*(-2.15148222830615*H1 + 1.08503735590009*H2 + 0.32499274843317*H3 + 0.579479680219253*H4 + -0.445472518402536*H5 + 1.44391677224718*H6 + 0.257983211811362*H7 + 0.2561645900728*H8 + 0.678891724374505*H9 + -0.178197187608597*H10 + 0.833341687953585*H11 + 1.18631182625821*H12 + -1.29407761703954*H13 + -3.37854261181773*H14 + -0.689752104015848*H15 + 0.148612090243198*H16 + 0.198220175…
	Eq. A31	HH11 = tanh(.5*(1.29989878892333*H1 + -0.872778644900043*H2 + 2.13693889578362*H3 + -1.08196567100104*H4 + 0.0861270712278032*H5 + 0.187437742616504*H6 + -0.688437414068651*H7 + 0.775821590770841*H8 + -2.0003597009017*H9 + -1.12909184242931*H10 + -1.13015564896306*H11 + 0.477182507560208*H12 + -0.50647816153178*H13 + -2.15787241519516*H14 + -2.19603090998418*H15 + 0.619803952995395*H16 + -0.15147…
	Eq. A32	HH12 = tanh(.5*(-2.56195648143023*H1 + 0.793027220385746*H2 + 0.275033630660929*H3 + -0.356979800736668*H4 + 1.79166880280163*H5 + 2.24204312129101*H6 + 1.56707519576785*H7 + -0.971893406931413*H8 + -1.07448035592131*H9 + 1.23267153154935*H10 + -2.41619830854977*H11 + -1.6896687450656*H12 + 2.19777052371686*H13 + -0.234376574424733*H14 + -1.7554297762706*H15 + 1.14529348430113*H16 + 0.44895589604…
	Eq. A33	HH13 = tanh(.5*(-2.5528151660586*H1 + 0.487908140202262*H2 + -0.796085689787124*H3 + 0.521578272241299*H4 + 1.38450622708396*H5 + -0.0968285186208099*H6 + 0.214724104975856*H7 + 2.33840699233284*H8 + 0.383914211296093*H9 + 1.38732664142893*H10 + -1.29893640030525*H11 + -0.032048337603167*H12 + 0.134439367438834*H13 + 1.25042075318534*H14 + -2.50662030470815*H15 + -0.144627225702753*H16 + 1.119570…
	Eq. A34	HH14 = tanh(.5*(0.768180360855966*H1 + -0.241175731024281*H2 + 2.90367549296098*H3 + -1.53187789923622*H4 + 1.54761591456523*H5 + -0.553128331267339*H6 + -0.648498142174091*H7 + 0.704692133784119*H8 + -0.97547663433655*H9 + -1.50850595706666*H10 + 0.80906975959792*H11 + 1.19943147493415*H12 + 0.565439054854396*H13 + -0.374595785736405*H14 + -0.932059961349288*H15 + 2.24832743338693*H16 + -1.01226…
	Eq. A35	HH15 = tanh(.5*(1.91907925886719*H1 + 0.109864202576051*H2 + -0.671552664769476*H3 + 1.39269031585756*H4 + -1.88289225463114*H5 + -0.985024880193778*H6 + 0.345719208472778*H7 + -0.925704821583365*H8 + 0.0723204201770119*H9 + -2.2951078058448*H10 + -1.35382311989608*H11 + -0.0503561865639999*H12 + -0.726696083513879*H13 + 1.20176145251198*H14 + 0.192089366889044*H15 + 0.158138378997372*H16 + 1.448…
	Eq. A36	HH16 = tanh(.5*(-0.626157978680053*H1 + -0.275303791089506*H2 + -0.115483212698698*H3 + 1.25736412844281*H4 + 1.79919849647648*H5 + 1.40095249444246*H6 + 1.92021823671331*H7 + -1.35752400032398*H8 + 1.758042913877*H9 + -0.112247283471519*H10 + 0.797219639957704*H11 + 1.25339469631866*H12 + 1.36911166788467*H13 + 0.652445970472831*H14 + 0.592671246804455*H15 + 0.526337087655268*H16 + -0.7483956553…
	Eq. A37	HH17 = tanh(.5*(-1.85884456555977*H1 + 1.58305262587916*H2 + -0.269421967185386*H3 + -1.68274467804533*H4 + -1.213361467281*H5 + 1.6629619623974*H6 + -3.28874763965236*H7 + 1.19764192345336*H8 + -0.315863706454233*H9 + 1.55328295414956*H10 + 0.699511204391928*H11 + -1.41068561857898*H12 + -2.85060105824274*H13 + -0.690101874278802*H14 + 0.075015427266611*H15 + 1.54640257600021*H16 + 0.95868418901…
	Eq. A38	HH18 = tanh(.5*(0.176689905336405*H1 + 2.40721461061103*H2 + 0.289131780189197*H3 + 0.506310722727522*H4 + -0.22090139238998*H5 + -0.836440237504012*H6 + -1.55180607997348*H7 + 1.19795893349034*H8 + 0.296309421531692*H9 + 0.227709271698601*H10 + 2.26907223790295*H11 + 1.33850854557134*H12 + -0.0528784357119188*H13 + -0.754259283528755*H14 + 1.37711654245116*H15 + -0.516094784148084*H16 + -0.13315…
	Eq. A39	HH19 = tanh(.5*(-0.369885238475868*H1 + -0.77328436222042*H2 + -3.39264533639239*H3 + -0.600377520490843*H4 + -0.932300311311465*H5 + 0.773043835187558*H6 + 0.956096818680111*H7 + 1.95286183226458*H8 + -0.67294357268067*H9 + 3.80471259202774*H10 + 2.16060121180621*H11 + -0.438045595584608*H12 + 1.275571538156*H13 + -1.76557760304795*H14 + 0.97766581856197*H15 + 0.667671965989897*H16 + -0.82106929…
	Eq. A40	HH20 = tanh(.5*(0.459205862808561*H1 + 0.366883008464563*H2 + -0.999856574664506*H3 + -2.68832538263687*H4 + 0.0868838589907369*H5 + 0.26082084000688*H6 + -0.514055609691547*H7 + 2.19703683831975*H8 + -3.33171030656112*H9 + 0.498873423789482*H10 + 1.63320117348591*H11 + -0.420472927523422*H12 + -1.41355741800702*H13 + -0.84955002988949*H14 + 0.281045153913108*H15 + -0.374689676442687*H16 + -0.039…
	Eq. A41	Ln k= 2.91770533844837*HH1 + -1.85463491478037*HH2 + -2.00359267757612*HH3 + -3.82202625989661*HH4 + -6.62495921865217*HH5 + 3.19494439375198*HH6 + -3.22201613062164*HH7 + -3.00743891673287*HH8 + -2.73199237677227*HH9 + -0.510370679010243*HH10 + 2.58301376652176*HH11 + 4.1671141763491*HH12 + 1.05757347934437*HH13 + -2.84624889485215*HH14 + 0.0153202483827103*HH15 + 0.596658974530362*HH16 + 2.6949…
	NH3 Sensing Response
	Eq. A1	H1 = tanh(.5*(-610.615717237177*MonoMol + 2.72754168083856*((OxiType="[(NH4)2S2O8]")-(OxiType="[/]")) + -40.6621507885094*OxiMol + -4.58061418858045*((NFType="[/]")-(NFType="[rGO]")) + -1.05845818441953*((NFType="[GO]")-(NFType="[rGO]")) + -8.2849538787106*((NFType="[Gr]")-(NFType="[rGO]")) + -0.0152293236659365*NFwt + 7.99083352246257*((DopType="[C6H18O24P6]")-(DopType="[I2]")) + -5.959169843435…
	Eq. A2	H2 = tanh(.5*(67.0134174832855*MonoMol + -1.98332728982345*((OxiType="[(NH4)2S2O8]")-(OxiType="[/]")) + 5.402597704472*OxiMol + 6.52851973881923*((NFType="[/]")-(NFType="[rGO]")) + 8.98266009728389*((NFType="[GO]")-(NFType="[rGO]")) + 3.34332960813554*((NFType="[Gr]")-(NFType="[rGO]")) + 0.143265342725637*NFwt + -3.95331790791807*((DopType="[C6H18O24P6]")-(DopType="[I2]")) + 4.85723440530758*((Do…
	Eq. A3	H3 = tanh(.5*(11.343440960142*MonoMol + -8.79625348154902*((OxiType="[(NH4)2S2O8]")-(OxiType="[/]")) + -136.410683875312*OxiMol + 1.42855784057183*((NFType="[/]")-(NFType="[rGO]")) + 2.93064342049725*((NFType="[GO]")-(NFType="[rGO]")) + 3.66526566671197*((NFType="[Gr]")-(NFType="[rGO]")) + 0.0238223525427195*NFwt + -5.03947411855096*((DopType="[C6H18O24P6]")-(DopType="[I2]")) + 1.7065031872812*((…
	Eq. A4	H4 = tanh(.5*(65.2120918115426*MonoMol + 1.60754694148487*((OxiType="[(NH4)2S2O8]")-(OxiType="[/]")) + 20.5182216187635*OxiMol + 4.99723321784306*((NFType="[/]")-(NFType="[rGO]")) + 0.089773113732761*((NFType="[GO]")-(NFType="[rGO]")) + 0.916842369789701*((NFType="[Gr]")-(NFType="[rGO]")) + -0.12895241520658*NFwt + -5.36396480597725*((DopType="[C6H18O24P6]")-(DopType="[I2]")) + -0.905436777340234…
	Eq. A5	H5 = tanh(.5*(-78.250032611235*MonoMol + 5.61631482884987*((OxiType="[(NH4)2S2O8]")-(OxiType="[/]")) + -34.7020553554764*OxiMol + 4.7689956072062*((NFType="[/]")-(NFType="[rGO]")) + -4.37023407163633*((NFType="[GO]")-(NFType="[rGO]")) + 5.68922502254243*((NFType="[Gr]")-(NFType="[rGO]")) + 0.19134321669267*NFwt + 4.24531531776752*((DopType="[C6H18O24P6]")-(DopType="[I2]")) + -4.06301212995779*((D…
	Eq. A6	H6 = tanh(.5*(4.41898796951613*MonoMol + 2.84209063228288*((OxiType="[(NH4)2S2O8]")-(OxiType="[/]")) + 38.3480103237736*OxiMol + -1.79322016893478*((NFType="[/]")-(NFType="[rGO]")) + -1.58404260168728*((NFType="[GO]")-(NFType="[rGO]")) + -1.18013326810286*((NFType="[Gr]")-(NFType="[rGO]")) + -0.0983136151995317*NFwt + 5.4060021940968*((DopType="[C6H18O24P6]")-(DopType="[I2]")) + 3.37546648315902*…
	Eq. A7	H7 = tanh(.5*(-113.961264729753*MonoMol + -1.34527855939092*((OxiType="[(NH4)2S2O8]")-(OxiType="[/]")) + 44.6377714989388*OxiMol + 1.31793853850103*((NFType="[/]")-(NFType="[rGO]")) + -6.26834698412933*((NFType="[GO]")-(NFType="[rGO]")) + 1.90574474483618*((NFType="[Gr]")-(NFType="[rGO]")) + 0.139073078398893*NFwt + -4.04191568587727*((DopType="[C6H18O24P6]")-(DopType="[I2]")) + 0.607186085318705…
	Eq. A8	H8 = tanh(.5*(76.9884529352172*MonoMol + -3.63429266119492*((OxiType="[(NH4)2S2O8]")-(OxiType="[/]")) + 67.4634063902859*OxiMol + 1.56008871914522*((NFType="[/]")-(NFType="[rGO]")) + -0.051133250765056*((NFType="[GO]")-(NFType="[rGO]")) + -0.453180562075694*((NFType="[Gr]")-(NFType="[rGO]")) + 0.0711833024058613*NFwt + -13.73415391346*((DopType="[C6H18O24P6]")-(DopType="[I2]")) + 1.83464634053035…
	Eq. A9	H9 = tanh(.5*(29.7193590076108*MonoMol + 5.63197811854052*((OxiType="[(NH4)2S2O8]")-(OxiType="[/]")) + -35.2674476083281*OxiMol + -0.0993065428940128*((NFType="[/]")-(NFType="[rGO]")) + 1.13988913336259*((NFType="[GO]")-(NFType="[rGO]")) + -0.0841935284050164*((NFType="[Gr]")-(NFType="[rGO]")) + 0.0139263279779496*NFwt + 8.62070265215338*((DopType="[C6H18O24P6]")-(DopType="[I2]")) + 7.23188104757…
	Eq. A10	H10 = tanh(.5*(1.77453726689125*MonoMol + -0.030461336555111*((OxiType="[(NH4)2S2O8]")-(OxiType="[/]")) + 11.8844478626547*OxiMol + -1.79648863890944*((NFType="[/]")-(NFType="[rGO]")) + -5.98958078633221*((NFType="[GO]")-(NFType="[rGO]")) + 2.06882459610776*((NFType="[Gr]")-(NFType="[rGO]")) + 0.168629000385347*NFwt + 4.98762174571232*((DopType="[C6H18O24P6]")-(DopType="[I2]")) + 3.96983469243875…
	Eq. A11	H11 = tanh(.5*(-33.6448194474743*MonoMol + -9.09771255018795*((OxiType="[(NH4)2S2O8]")-(OxiType="[/]")) + -16.9269830908115*OxiMol + -0.403282226613793*((NFType="[/]")-(NFType="[rGO]")) + 1.30966125304462*((NFType="[GO]")-(NFType="[rGO]")) + -5.11381915970523*((NFType="[Gr]")-(NFType="[rGO]")) + 0.179451247177374*NFwt + 2.5147980473075*((DopType="[C6H18O24P6]")-(DopType="[I2]")) + 1.7680407562794…
	Eq. A12	H12 = tanh(.5*(39.3516047467928*MonoMol + 0.0516503822618035*((OxiType="[(NH4)2S2O8]")-(OxiType="[/]")) + -22.3718475909095*OxiMol + -1.87037660070659*((NFType="[/]")-(NFType="[rGO]")) + -2.28344098865475*((NFType="[GO]")-(NFType="[rGO]")) + 3.96737168276146*((NFType="[Gr]")-(NFType="[rGO]")) + 0.0566918997921254*NFwt + -4.26944695779385*((DopType="[C6H18O24P6]")-(DopType="[I2]")) + 2.47272251684…
	Eq. A13	H13 = tanh(.5*(29.1535443542453*MonoMol + 4.64914437882017*((OxiType="[(NH4)2S2O8]")-(OxiType="[/]")) + -14.8561258847728*OxiMol + 6.32528666478251*((NFType="[/]")-(NFType="[rGO]")) + -2.21965176831898*((NFType="[GO]")-(NFType="[rGO]")) + 0.164031573109969*((NFType="[Gr]")-(NFType="[rGO]")) + -0.0276670267639493*NFwt + -4.32365627015282*((DopType="[C6H18O24P6]")-(DopType="[I2]")) + 5.149881566389…
	Eq. A14	H14 = tanh(.5*(-27.841401852916*MonoMol + 8.77068510453627*((OxiType="[(NH4)2S2O8]")-(OxiType="[/]")) + -99.2584187832269*OxiMol + -1.68979284889933*((NFType="[/]")-(NFType="[rGO]")) + -0.524449253323101*((NFType="[GO]")-(NFType="[rGO]")) + 1.41418691411247*((NFType="[Gr]")-(NFType="[rGO]")) + -0.0536916318036141*NFwt + -11.7239148577355*((DopType="[C6H18O24P6]")-(DopType="[I2]")) + -0.2665586507…
	Eq. A15	H15 = tanh(.5*(6.46072019037469*MonoMol + 6.56709660357349*((OxiType="[(NH4)2S2O8]")-(OxiType="[/]")) + 2.76275965912551*OxiMol + -0.218033037222912*((NFType="[/]")-(NFType="[rGO]")) + -1.31458102818205*((NFType="[GO]")-(NFType="[rGO]")) + 0.617722861219392*((NFType="[Gr]")-(NFType="[rGO]")) + 0.0319921126683002*NFwt + 1.65308612341297*((DopType="[C6H18O24P6]")-(DopType="[I2]")) + 2.8037721323463…
	Eq. A16	H16 = tanh(.5*(-96.8009896502304*MonoMol + 5.15777060766846*((OxiType="[(NH4)2S2O8]")-(OxiType="[/]")) + -78.5347573486786*OxiMol + 5.72581071885017*((NFType="[/]")-(NFType="[rGO]")) + -2.21496617044461*((NFType="[GO]")-(NFType="[rGO]")) + 1.30982610785593*((NFType="[Gr]")-(NFType="[rGO]")) + -0.238954864187577*NFwt + -8.19805534292349*((DopType="[C6H18O24P6]")-(DopType="[I2]")) + 0.5581574652628…
	Eq. A17	H17 = tanh(.5*(-50.169583628779*MonoMol + 2.70071261014291*((OxiType="[(NH4)2S2O8]")-(OxiType="[/]")) + -47.9791093533795*OxiMol + 3.87661110449472*((NFType="[/]")-(NFType="[rGO]")) + -5.06811299679321*((NFType="[GO]")-(NFType="[rGO]")) + 5.6070322618125*((NFType="[Gr]")-(NFType="[rGO]")) + -0.0309371055712617*NFwt + -0.625220694509693*((DopType="[C6H18O24P6]")-(DopType="[I2]")) + 3.0855600940358…
	Eq. A18	H18 = tanh(.5*(-66.3406013258468*MonoMol + 1.61553038690906*((OxiType="[(NH4)2S2O8]")-(OxiType="[/]")) + -1.97033140809359*OxiMol + -3.67150652259657*((NFType="[/]")-(NFType="[rGO]")) + -4.37851543919893*((NFType="[GO]")-(NFType="[rGO]")) + -4.66538660693922*((NFType="[Gr]")-(NFType="[rGO]")) + 0.282243793181921*NFwt + -7.06192966805854*((DopType="[C6H18O24P6]")-(DopType="[I2]")) + 3.957564735811…
	Eq. A19	H19 = tanh(.5*(55.2553123383199*MonoMol + -0.552059172390186*((OxiType="[(NH4)2S2O8]")-(OxiType="[/]")) + 5.42325870484486*OxiMol + -7.96317352807033*((NFType="[/]")-(NFType="[rGO]")) + 7.53846848757477*((NFType="[GO]")-(NFType="[rGO]")) + -0.491650560447773*((NFType="[Gr]")-(NFType="[rGO]")) + 0.0428173879052739*NFwt + -4.20817292797965*((DopType="[C6H18O24P6]")-(DopType="[I2]")) + -3.1851369674…
	Eq. A20	H20 = tanh(.5*(48.4496804231659*MonoMol + 2.27705229116118*((OxiType="[(NH4)2S2O8]")-(OxiType="[/]")) + 20.0865658679707*OxiMol + 0.216473664561426*((NFType="[/]")-(NFType="[rGO]")) + 0.120423640226417*((NFType="[GO]")-(NFType="[rGO]")) + -2.51883142269795*((NFType="[Gr]")-(NFType="[rGO]")) + -0.0122953513894813*NFwt + 2.15721183063169*((DopType="[C6H18O24P6]")-(DopType="[I2]")) + -1.755803626255…
	Eq. A21	HH1 = tanh(.5*(0.00967215526261759*H1 + 0.873435278865394*H2 + -0.114829929937866*H3 + -1.0866307842855*H4 + 1.32505621422316*H5 + 0.604939867769667*H6 + -0.381791407113996*H7 + -2.19879387118064*H8 + -0.985186782333696*H9 + 2.8282526069294*H10 + 1.89671617476517*H11 + 1.1384544581293*H12 + 0.617335738054026*H13 + 0.0596876025104694*H14 + -1.84597918823691*H15 + -1.28230632303671*H16 + -0.7936235…
	Eq. A22	HH2 = tanh(.5*(-1.60766986264653*H1 + 0.0630613246192909*H2 + 0.809894374052884*H3 + 5.47967255333878*H4 + 4.35789742236827*H5 + 0.664859299307522*H6 + -0.361392495701859*H7 + -1.04008694084443*H8 + -0.0892680940192159*H9 + -1.50372264924546*H10 + 2.09958909408413*H11 + -0.325379641047572*H12 + -3.10561576344239*H13 + -0.959056943684325*H14 + 0.290167613467443*H15 + -1.41973432109889*H16 + 2.2220…
	Eq. A23	HH3 = tanh(.5*(3.58566450059386*H1 + -2.37057607195477*H2 + 3.76112358091045*H3 + 1.04128742692651*H4 + 0.148223496547037*H5 + -1.8198108668994*H6 + 0.889420858507193*H7 + 3.72993729104346*H8 + -1.42236866324241*H9 + -2.05025171690288*H10 + 0.236358962979622*H11 + -1.65610712604545*H12 + 4.9312582490358*H13 + -0.42765614141179*H14 + 0.922923987795634*H15 + 2.5871495812973*H16 + 0.724350211311588*…
	Eq. A24	HH4 = tanh(.5*(-1.96913170601368*H1 + -0.555815926230887*H2 + -0.115805223334837*H3 + -1.0283155257211*H4 + -0.763320557452185*H5 + -1.39838737113894*H6 + 1.75404630610849*H7 + -2.963026853323*H8 + 1.00104523822737*H9 + 0.0875083490072353*H10 + 2.12208645913763*H11 + 2.27305849981095*H12 + -2.73291843095917*H13 + 0.0350249936949554*H14 + 1.05694430361278*H15 + 5.400102506109*H16 + 0.8047750584096…
	Eq. A25	HH5 = tanh(.5*(-2.24764372617891*H1 + 0.562854813470885*H2 + -1.55350417437862*H3 + 1.17080739151844*H4 + -0.543893245953577*H5 + 1.02135698141657*H6 + -0.599273879274797*H7 + -0.847295798811225*H8 + -0.519058368899823*H9 + 1.69409267745644*H10 + -0.303172803686656*H11 + 1.72956619169705*H12 + 1.19685541977244*H13 + -1.58458435031537*H14 + 0.855223000707125*H15 + -1.64122792434379*H16 + -0.950482…
	Eq. A26	HH6 = tanh(.5*(1.37349334057354*H1 + 0.0274500938138393*H2 + 0.390178642029415*H3 + 0.199637809615993*H4 + -1.45887376083157*H5 + 0.45740266437878*H6 + -2.77908319987966*H7 + -2.9446350680758*H8 + 2.30994648642131*H9 + 2.18796224450916*H10 + -2.64823028830513*H11 + -1.09997855983899*H12 + -3.87124296523817*H13 + 0.0336906625200265*H14 + -0.584708931661937*H15 + -2.06932117327022*H16 + 0.142640149…
	Eq. A27	HH7 = tanh(.5*(-3.08396489598376*H1 + 1.53237968688609*H2 + 2.20980952159521*H3 + 1.33724505532727*H4 + -0.630406516860593*H5 + 0.905051350127067*H6 + -0.586881179321516*H7 + 0.0783159474899662*H8 + -0.513494065199842*H9 + 0.851998094204044*H10 + 0.710867037279599*H11 + -2.27012661809934*H12 + 0.0161006177651041*H13 + -2.4532315469783*H14 + 3.59248151813696*H15 + 0.631810835424522*H16 + 2.2366699…
	Eq. A28	HH8 = tanh(.5*(-2.86246003712791*H1 + 1.07070383555352*H2 + 2.09822689516325*H3 + 1.00023703451075*H4 + 7.34133011558457*H5 + 3.19714825165926*H6 + 8.17704230979318*H7 + 2.48940691494825*H8 + 15.9872329547032*H9 + -0.00703485963943646*H10 + -1.2860843895755*H11 + -2.34555999788835*H12 + -1.09738161502389*H13 + 4.78664023099921*H14 + 0.445708208720984*H15 + -5.33962938510728*H16 + -1.0771427811314…
	Eq. A29	HH9 = tanh(.5*(-1.37505597798967*H1 + 3.22067835679508*H2 + -0.0781347464113414*H3 + 0.0793691936386169*H4 + -2.6954099151001*H5 + -1.50768685677178*H6 + -5.2382738492896*H7 + -1.3248061191105*H8 + 0.324653614077367*H9 + 1.78308086015345*H10 + -2.46526733422021*H11 + -0.00494612515560525*H12 + -1.63196735998674*H13 + -1.10920302596296*H14 + 0.833829777211674*H15 + -3.08808816685796*H16 + 1.065565…
	Eq. A30	HH10 = tanh(.5*(0.426596939908654*H1 + -0.405790566749282*H2 + 0.0839273845464829*H3 + 1.20598737646958*H4 + 0.431053022412642*H5 + -2.57747148716171*H6 + -1.18722126214154*H7 + 0.022892404099979*H8 + -1.72982295590097*H9 + 2.28051373157601*H10 + 1.62681460487421*H11 + 0.800100189886153*H12 + 3.53121179963002*H13 + -2.59891775384775*H14 + 0.373399668028425*H15 + -1.15884594740427*H16 + 0.08827740…
	Eq. A31	Ln SR NH3= 0.852742716970478*HH1 + 2.81818529140599*HH2 + -9.49687825700415*HH3 + 6.28804450772143*HH4 + 1.96835173626014*HH5 + 0.744294388150213*HH6 + 3.3577112066989*HH7 + 10.8313308119119*HH8 + -7.71703788499882*HH9 + -4.32282475729459*HH10 + -0.234054472093511
	C7H8 Sensing Response
	Eq. A1	H1 = tanh(.5*(-68.001444496231*MonoMol + + -10.4248927543891*OxiMol + -0.0189668167475462*((NFType="[/]")-(NFType="[Gr]")) + -0.116878930895162*((NFType="[GO]")-(NFType="[Gr]")) + 0.147836630046726*NFwt + + 0.136192539963564*DopV + -0.23631425205905*DopC + 0.197060116297021*SynTemp + -0.309000676915854*SynTime + 2482341832119.2*OTemp + -0.000607201926130081*GConc + 0.917726009261574*__25 + 2.3785…
	Eq. A2	H2 = tanh(.5*(18.5389315641839*MonoMol + + -1.55656301446157*OxiMol + 0.116682479028285*((NFType="[/]")-(NFType="[Gr]")) + -2.78266596004052*((NFType="[GO]")-(NFType="[Gr]")) + 0.208846799272723*NFwt + + -0.128770437340995*DopV + 0.867223834169419*DopC + -1.23279679287589*SynTemp + -0.187135977109719*SynTime + 1780898765931.56*OTemp + 0.0000468981760543447*GConc + -1.56756074711577*__25 + -0.6217…
	Eq. A3	H3 = tanh(.5*(11.2793559866434*MonoMol + + -12.1721443955121*OxiMol + -0.566611175266333*((NFType="[/]")-(NFType="[Gr]")) + 1.45453281726754*((NFType="[GO]")-(NFType="[Gr]")) + 0.493433757950718*NFwt + + -0.0893249960899113*DopV + 0.923367322887475*DopC + -2.36507341767508*SynTemp + -0.65089874717634*SynTime + -910704902192.078*OTemp + 0.000584086062623536*GConc + 1.3141806764406*__25 + 0.5343533…
	Eq. A4	H4 = tanh(.5*(0.141574154478151*MonoMol + + 2.14454630358781*OxiMol + -0.648394210458819*((NFType="[/]")-(NFType="[Gr]")) + -0.791604505836072*((NFType="[GO]")-(NFType="[Gr]")) + 0.152643083585576*NFwt + + -0.134036062444628*DopV + -1.27225192111379*DopC + 0.849378441026461*SynTemp + 0.326152229797022*SynTime + -3257710303770.32*OTemp + -0.0000302634371363574*GConc + -0.363528675742202*__25 + -1.…
	Eq. A5	H5 = tanh(.5*(-16.2427554633528*MonoMol + + -3.00458731009376*OxiMol + -1.39718923192372*((NFType="[/]")-(NFType="[Gr]")) + -0.702297020542095*((NFType="[GO]")-(NFType="[Gr]")) + 0.861005016399832*NFwt + + -0.0237839074247232*DopV + 0.29520277645667*DopC + 0.47296229231152*SynTemp + -0.152879109182884*SynTime + -678297054226.323*OTemp + 0.000188382042442455*GConc + 1.21618417189625*__25 + 0.35444…
	Eq. A6	H6 = tanh(.5*(-7.29979499450474*MonoMol + + -7.84381438152722*OxiMol + -0.720636330557916*((NFType="[/]")-(NFType="[Gr]")) + 0.449461193702306*((NFType="[GO]")-(NFType="[Gr]")) + 0.684207351897926*NFwt + + -0.0142259403348804*DopV + -0.874996189461666*DopC + 0.322901407849241*SynTemp + -0.413052032311825*SynTime + -1986926757522.82*OTemp + -0.000534235393801782*GConc + 2.67381344501698*__25 + -0.…
	Eq. A7	H7 = tanh(.5*(-3.44379713596509*MonoMol + + 7.54408711979847*OxiMol + -0.968395491322551*((NFType="[/]")-(NFType="[Gr]")) + -1.27047199669592*((NFType="[GO]")-(NFType="[Gr]")) + -0.429071403258398*NFwt + + -0.0844597782446067*DopV + -2.58617050738704*DopC + -1.15129628593168*SynTemp + 0.767768730132558*SynTime + -454967076391.63*OTemp + -0.000218174633228936*GConc + -1.95878799691911*__25 + 0.353…
	Eq. A8	H8 = tanh(.5*(20.7600246906208*MonoMol + + 5.36909486870263*OxiMol + -0.131818860736993*((NFType="[/]")-(NFType="[Gr]")) + 1.09897097825324*((NFType="[GO]")-(NFType="[Gr]")) + 0.0885136983079248*NFwt + + 0.0300407812593872*DopV + 1.46181095456911*DopC + -1.20260053914292*SynTemp + -0.3644346516619*SynTime + -1084844339575.65*OTemp + -0.0000207226000527394*GConc + -0.32951343564709*__25 + -0.03592…
	Eq. A9	H9 = tanh(.5*(-0.527697705877614*MonoMol + + -9.69669154616415*OxiMol + 0.633875428189695*((NFType="[/]")-(NFType="[Gr]")) + 4.84472601430651*((NFType="[GO]")-(NFType="[Gr]")) + 0.15209910979863*NFwt + + 0.0251981173090437*DopV + 2.05572175203631*DopC + -1.92935545112799*SynTemp + 0.418246296031563*SynTime + -454209678341.226*OTemp + 0.000141968851334424*GConc + -1.08570949803599*__25 + 0.1675134…
	Eq. A10	H10 = tanh(.5*(-2.62643154465133*MonoMol + + -20.1133212180795*OxiMol + 0.0571924422611291*((NFType="[/]")-(NFType="[Gr]")) + -0.197250265603301*((NFType="[GO]")-(NFType="[Gr]")) + -0.333248881291154*NFwt + + 0.0546608100240465*DopV + 0.171876457633524*DopC + 1.39419359640411*SynTemp + 0.134084844732937*SynTime + -3093651268410.12*OTemp + 0.000586675679818451*GConc + -1.82966364833998*__25 + 0.36…
	Eq. A11	HH1 = tanh(.5*(2.59802882291997*H1 + 0.441449172180782*H2 + 0.75025190352156*H3 + 1.24385018152674*H4 + 2.4049243918009*H5 + 0.330056793143972*H6 + 0.31477077038002*H7 + 0.731478262324942*H8 + 0.542200837233958*H9 + -1.2958729711359*H10 + 0.131198793691412;));
	Eq. A12	HH2 = tanh(.5*(0.840984297457375*H1 + -1.09565560181021*H2 + 0.812548664831689*H3 + -0.502122730429088*H4 + -1.15798917694188*H5 + 1.62556135585129*H6 + -0.87908211946291*H7 + 2.41864700625689*H8 + 2.87887142338787*H9 + 0.639625595358773*H10 + 1.30799890480471;));
	Eq. A13	HH3 = tanh(.5*(0.0762730981504427*H1 + -1.51945281921852*H2 + 0.237440177707642*H3 + 0.62404663230538*H4 + -1.4143751229348*H5 + 0.484250247194542*H6 + -0.558568344897912*H7 + 0.994356282752084*H8 + -0.221603616528763*H9 + -1.39497105628079*H10 + 0.633273992793129;))
	Eq. A14	HH4 = tanh(.5*(2.4650268945768*H1 + 0.515962841723377*H2 + -3.68006793338077*H3 + -1.97057695072381*H4 + -1.1159883296986*H5 + -1.06035527177379*H6 + 1.18952586024402*H7 + 1.57819185597941*H8 + -0.515134341362131*H9 + -0.692620972773856*H10 + -0.141528480957769;));
	Eq. A15	HH5 = tanh(.5*(0.563165114478301*H1 + 1.53930143759833*H2 + -0.684126929673272*H3 + 1.8444291842481*H4 + -1.52692894699268*H5 + 0.183753034518665*H6 + 0.294428613990564*H7 + 0.479135797555432*H8 + -2.84975472668634*H9 + 0.633841069133491*H10 + 1.0792242271832;));
	Eq. A16	HH6 = tanh(.5*(-0.0526285402482591*H1 + 1.3836581525063*H2 + -1.09260764423046*H3 + -1.11080595150467*H4 + -1.85000106357395*H5 + -3.5594789478241*H6 + -0.746319733551948*H7 + -0.853087970552328*H8 + -0.0565424910645399*H9 + -0.507438263188082*H10 + -0.256956375320452;));
	Eq. A17	HH7 = tanh(.5*(2.8290595529015*H1 + -2.05253194745008*H2 + 0.693543393043317*H3 + -1.9185233097772*H4 + -1.1528973700235*H5 + -0.838741680203916*H6 + 0.798478542802*H7 + 0.860256779130184*H8 + 0.0395904655310784*H9 + 1.17842306770876*H10 + -1.62752604435705;));
	Eq. A18	HH8 = tanh(.5*(-0.850399477999586*H1 + -0.0928544443882526*H2 + 4.07476793652166*H3 + 1.23541092472457*H4 + 0.135016228970706*H5 + -1.02824613323835*H6 + 1.75763764349203*H7 + -3.25071716088667*H8 + 1.08043215349619*H9 + 2.22776982499695*H10 + -0.745481818919428;));
	Eq. A19	HH9 = tanh(.5*(-1.21218115104589*H1 + -0.690103897768297*H2 + 1.06914698384873*H3 + -0.518065794819228*H4 + 1.48833379702354*H5 + 1.45601083810029*H6 + 0.464262601176694*H7 + -0.281469192612417*H8 + -0.250381213315571*H9 + 3.56903776003361*H10 + 0.20647349749939;));
	Eq. A20	HH10 = tanh(.5*(-1.0295795208444*H1 + -0.0229577739230115*H2 + 0.325594122935527*H3 + -1.65414412252739*H4 + -0.886624029930327*H5 + 0.635344514532083*H6 + 1.0432046987336*H7 + 0.216565081708806*H8 + 2.15645067002255*H9 + 1.67024716186576*H10 + 0.259292095743629;));
	Eq. A21	Ln SR C6H7=- 1.09739314667196*HH1 + -1.4053982417646*HH2 + -1.68525895225532*HH3 + -2.60385655137914*HH4 + -1.90984946593321*HH5 + 2.25225335114487*HH6 + -3.03344776859527*HH7 + -1.82793029210288*HH8 + 3.526860352955*HH9 + 1.14745138069271*HH10 + -1.0535133772666;
	C6H6 Sensing Response
	Eq. A1	H1 = tanh(.5*(119.422744963749*MonoMol + + 1.1507670448982*OxiMol + 3.47341260691719*((NFType="[/]")-(NFType="[rGO]")) + 2.00178738546214*((NFType="[Gr]")-(NFType="[rGO]")) + 1.26164431291604*NFwt + + -0.0895383663364866*DopV + 0.486735924637724*DopC + 0.363953803542988*SynTemp + -1.99270661378283*SynTime + 906782946002.227*OTemp + 0.000304325916944164*GConc + -0.0966084772427338*__25 + 0.5970280…
	Eq. A2	H2 = tanh(.5*(-11.3984117364578*MonoMol + + 14.3562260995525*OxiMol + 1.09993773530284*((NFType="[/]")-(NFType="[rGO]")) + -1.29840104980311*((NFType="[Gr]")-(NFType="[rGO]")) + -0.804837752715478*NFwt + + 0.134109847085422*DopV + 0.260596380320677*DopC + -1.08518482911128*SynTemp + -4.14224975913078*SynTime + -1972245007444.18*OTemp + 0.000347479772217443*GConc + 0.991459202610308*__25 + -0.2285…
	Eq. A3	H3 = tanh(.5*(-47.7704065428023*MonoMol + + -2.53199160316781*OxiMol + 7.42655585961488*((NFType="[/]")-(NFType="[rGO]")) + -3.83756683501097*((NFType="[Gr]")-(NFType="[rGO]")) + 1.18182501437838*NFwt + + -0.310013370424309*DopV + 1.62757097827452*DopC + 3.7597521798567*SynTemp + 1.59137252528202*SynTime + 481373312089.742*OTemp + -0.000383024418118261*GConc + 0.254057825264643*__25 + -0.86910272…
	Eq. A4	H4 = tanh(.5*(-7.28897164479916*MonoMol + + -34.5240873696372*OxiMol + -2.15527113892699*((NFType="[/]")-(NFType="[rGO]")) + 2.66431957469638*((NFType="[Gr]")-(NFType="[rGO]")) + 0.353163829590674*NFwt + + 0.0432332930545286*DopV + -0.756495124095082*DopC + 1.91504779616416*SynTemp + -0.758344274777955*SynTime + 3138219213697.21*OTemp + -0.000725760563116389*GConc + -0.235651749531524*__25 + -0.5…
	Eq. A5	H5 = tanh(.5*(21.4914961668998*MonoMol + + -1.92613116831067*OxiMol + -2.75847315865577*((NFType="[/]")-(NFType="[rGO]")) + -3.58377370728013*((NFType="[Gr]")-(NFType="[rGO]")) + 0.157418394554736*NFwt + + 0.0519077391125815*DopV + 0.934958915365984*DopC + -3.97718051067187*SynTemp + -2.21495174304074*SynTime + 719534550371.384*OTemp + 0.000261127252423598*GConc + -0.763772927947566*__25 + 0.3938…
	Eq. A6	H6 = tanh(.5*(12.119691046788*MonoMol + + -13.8306601765252*OxiMol + -4.12087521253687*((NFType="[/]")-(NFType="[rGO]")) + -0.829538384488213*((NFType="[Gr]")-(NFType="[rGO]")) + 0.883553829271779*NFwt + + -0.0423951522690392*DopV + 0.321393263899849*DopC + 4.0329124058272*SynTemp + 3.7368382002197*SynTime + 1642920499015.75*OTemp + -0.000315776466228413*GConc + 0.390137675584874*__25 + 0.4275109…
	Eq. A7	H7 = tanh(.5*(31.1212842436105*MonoMol + + -12.093060168627*OxiMol + 1.55444744099143*((NFType="[/]")-(NFType="[rGO]")) + -1.03694657164733*((NFType="[Gr]")-(NFType="[rGO]")) + -0.749583853166507*NFwt + + 0.175220361934683*DopV + -0.108964410973662*DopC + -0.469639371257799*SynTemp + -1.47754559173969*SynTime + 3228656899529.83*OTemp + 0.000147549376890675*GConc + -1.41540477490746*__25 + -1.2150…
	Eq. A8	H8 = tanh(.5*(-6.37500390408319*MonoMol + + -13.7560595352425*OxiMol + 6.26595085188194*((NFType="[/]")-(NFType="[rGO]")) + -2.78715980158432*((NFType="[Gr]")-(NFType="[rGO]")) + -0.347574350042535*NFwt + + -0.0402659851068396*DopV + -0.691143682003346*DopC + 3.75637672373404*SynTemp + -0.976648736448397*SynTime + 1460464644406.12*OTemp + 0.00188675454791818*GConc + 1.3006797512236*__25 + 1.82794…
	Eq. A9	H9 = tanh(.5*(-9.26559471103239*MonoMol + + 13.4190339279906*OxiMol + -0.564029063408312*((NFType="[/]")-(NFType="[rGO]")) + 1.5802900609284*((NFType="[Gr]")-(NFType="[rGO]")) + -0.342894161108548*NFwt + + -0.000146392317097397*DopV + 0.811357267660893*DopC + 1.33759961935569*SynTemp + 5.91845796530451*SynTime + 1286781743738.14*OTemp + -0.000277425601535735*GConc + -1.38693677826142*__25 + 0.735…
	Eq. A10	H10 = tanh(.5*(-7.52934882477437*MonoMol + + 4.49369877067219*OxiMol + -1.67338007446608*((NFType="[/]")-(NFType="[rGO]")) + 0.191448685641864*((NFType="[Gr]")-(NFType="[rGO]")) + -0.110674702094299*NFwt + + 0.25323135375105*DopV + 0.0619445954825841*DopC + 0.797591820046742*SynTemp + 3.70505922477082*SynTime + -2012314010990.29*OTemp + -0.0000012453003216805*GConc + 1.12567381487736*__25 + 0.925…
	Eq. A11	H11 = tanh(.5*(-5.08822563680432*MonoMol + + 4.29507455358383*OxiMol + -2.68620202713235*((NFType="[/]")-(NFType="[rGO]")) + 2.7141270915587*((NFType="[Gr]")-(NFType="[rGO]")) + -0.0444807037316534*NFwt + + -0.226633156035678*DopV + -0.715054208829218*DopC + 2.16221169017226*SynTemp + 0.300371603745839*SynTime + -1176037066092.2*OTemp + 0.000163435344091517*GConc + 1.27492422963486*__25 + -2.0012…
	Eq. A12	H12 = tanh(.5*(-14.7429049116163*MonoMol + + -12.709499151582*OxiMol + -6.67062802133119*((NFType="[/]")-(NFType="[rGO]")) + 2.29458467483081*((NFType="[Gr]")-(NFType="[rGO]")) + -1.07041180393301*NFwt + + 0.261724723205657*DopV + 0.313579834931305*DopC + 0.10167961053146*SynTemp + -1.27961857099331*SynTime + -916459712614.983*OTemp + -0.000159281591019998*GConc + -0.780264879159316*__25 + 1.0385…
	Eq. A13	H13 = tanh(.5*(-20.2685474271002*MonoMol + + -14.2807225727498*OxiMol + -0.630518323708166*((NFType="[/]")-(NFType="[rGO]")) + 0.358088563453396*((NFType="[Gr]")-(NFType="[rGO]")) + -0.0445394409928053*NFwt + + -0.414116511895482*DopV + -2.2964404348288*DopC + -3.08964267913564*SynTemp + -5.23132729543291*SynTime + -1906235203963.8*OTemp + 0.0000747431674042932*GConc + -1.59263452347061*__25 + -1…
	Eq. A14	H14 = tanh(.5*(-7.70757722590665*MonoMol + + 0.479764734808317*OxiMol + 1.95842324491728*((NFType="[/]")-(NFType="[rGO]")) + 2.98417847810828*((NFType="[Gr]")-(NFType="[rGO]")) + 0.233901020254244*NFwt + + 0.35640735323312*DopV + -1.68647304908624*DopC + -1.47236762803497*SynTemp + -1.96501325789066*SynTime + -2301165121384.51*OTemp + -0.000153043281485634*GConc + 0.78708121461574*__25 + -1.59972…
	Eq. A15	H15 = tanh(.5*(-4.59521162061852*MonoMol + + -9.65321625661835*OxiMol + -1.74026855647397*((NFType="[/]")-(NFType="[rGO]")) + -1.14748399571512*((NFType="[Gr]")-(NFType="[rGO]")) + 0.187214967032912*NFwt + + -0.0335689502174284*DopV + 0.146345915178522*DopC + -2.1142199849503*SynTemp + 1.30550000231335*SynTime + -682244858211.567*OTemp + 0.00005658198942914*GConc + 2.79964720514653*__25 + 0.53654…
	Eq. A16	HH1 = tanh(.5*(-2.43609733002868*H1 + 0.857664140268063*H2 + 1.27014721157529*H3 + 0.00854274638257437*H4 + -2.42873353463*H5 + 0.162221830121044*H6 + -1.83189999061272*H7 + -0.0146303813452477*H8 + -0.521113081318558*H9 + -0.266927374921898*H10 + -1.75459938211758*H11 + -2.55890029102241*H12 + -0.70524672898342*H13 + -0.0742409351337517*H14 + 1.10109080467141*H15 + 0.723622769405505;));
	Eq. A17	HH2 = tanh(.5*(0.502854809965044*H1 + 1.13658789387175*H2 + -2.30719894061294*H3 + 0.155751724914892*H4 + 0.889330756907813*H5 + 0.66682933458135*H6 + 0.572906466736187*H7 + -0.321659961836918*H8 + -1.49060197266379*H9 + 0.400203263192666*H10 + 0.260455463547848*H11 + 1.61441802517129*H12 + -1.62727752209409*H13 + 0.283011598952177*H14 + 0.0590692984859962*H15 + -1.50801768588033;));
	Eq. A18	HH3 = tanh(.5*(1.66278941050854*H1 + 1.36836667842123*H2 + -0.146506479168699*H3 + 2.603894471434*H4 + -0.573188736931002*H5 + -0.856214740784225*H6 + -0.649797801193223*H7 + -0.305539174722246*H8 + 0.448926641211034*H9 + -0.26627485849906*H10 + -0.116213635221744*H11 + -1.13720109123814*H12 + 0.495047976507576*H13 + 0.254587322054749*H14 + 0.486465139515989*H15 + 2.79047773763709;));
	Eq. A19	HH4 = tanh(.5*(-2.33036039627114*H1 + 0.0552371893523306*H2 + -0.36002547271665*H3 + 7.92329966781914*H4 + -3.85991790343028*H5 + 0.8187744477551*H6 + 2.11231956010578*H7 + -4.77136284364643*H8 + -2.13091145699179*H9 + -0.408064979904826*H10 + -1.59689534328761*H11 + 0.263880433115424*H12 + 1.3808668327279*H13 + -0.732229202706096*H14 + -0.0153347492511788*H15 + -2.37448132281289;));
	Eq. A20	HH5 = tanh(.5*(-0.987985615925*H1 + -2.53324670264795*H2 + -1.76411854962888*H3 + 0.660742586919907*H4 + -1.63809754578603*H5 + -4.46055331236871*H6 + 0.00196514629643648*H7 + -0.997904988399855*H8 + 2.97206303472281*H9 + 1.35131302293558*H10 + 0.866445726150101*H11 + 2.07040703449646*H12 + -1.71691064894691*H13 + 0.562053766963288*H14 + 1.68925369569909*H15 + 0.57431018386865;));
	Eq. A21	Ln SR C6H6=- 1.43111072829815*HH1 + -0.128745341907939*HH2 + 0.899739424920537*HH3 + -0.792064193887442*HH4 + -0.340994414099832*HH5 + 1.17177879957369;
